# Supplementary material for: Decoys provide a scalable platform for the identification of plant E3 ubiquitin ligases that regulate circadian function
Source: eLife. 2019 Apr 5;8:e44558. doi: 10.7554/eLife.44558 (PMC6483598; doi:10.7554/eLife.44558)
Supplement: Supplementary file 1. [file elife-44558-supp1.xlsx]

## Sheet: Table S1 - All Data
AT #	Main Gene Name	All Gene Names	Description	References	PMID	Period Mean	Period Stdev	Period All	RAE Mean	RAE Stdev	RAE All	Phase Mean	Phase Stdev	Phase All
AT1G01670	PUB56	PUB56	RING/U-box superfamily protein;(source:Araport11)	501721539,501739720	17521414,20736450	0.0151857	0.530331	-0.5065, -0.2465, -0.5865, -0.2465, 0.4135, -0.9765, -1.2565, 1.2035, -0.6365, -0.3865, -0.1765, -0.3565, 0.6835, 0.1535, -0.1465, 0.4935, -0.2365, -0.4265, 0.1135, -0.2965, 0.7535, -0.4065, -0.6565, 0.3435, 0.3035, 0.9135, 0.7035, 0.2535, 0.2935, 1.2735, -0.34103, -0.01103, -0.19103, -0.15103, -0.21103, 0.508974, -0.35103, 0.438974, 0.418974, -0.05103, -0.10103, 0.338974, 0.538974, -0.19103, -0.…	0.151587	0.0403879	0.14, 0.15, 0.08, 0.11, 0.09, 0.16, 0.17, 0.13, 0.18, 0.1, 0.15, 0.11, 0.16, 0.14, 0.1, 0.13, 0.12, 0.15, 0.12, 0.14, 0.18, 0.13, 0.12, 0.19, 0.14, 0.16, 0.18, 0.1, 0.19, 0.22, 0.151, 0.124, 0.204, 0.162, 0.141, 0.156, 0.182, 0.132, 0.225, 0.152, 0.113, 0.288, 0.199, 0.219, 0.142, 0.143,	1.70772	1.1929	2.03625, 2.71625, 2.26625, 2.73625, 2.98625, -0.98375, -1.19375, 3.71625, 0.19625, 2.30625, 2.54625, 1.08625, 1.79625, 3.39625, 2.74625, 1.10625, 1.47625, 2.55625, 1.58625, 2.05625, 2.48625, 0.80625, 1.93625, 1.91625, 2.07625, 2.21625, 2.46625, 2.98625, 0.73625, 2.31625, -1.7059, 1.398103, 1.215103, 2.683103, 1.476103, 3.001103, 2.590103, 2.372103, 1.469103, 1.074103, 1.619103, 0.391103, 2.633103…
AT1G01680	PLANT U-BOX 54 PUB54	PLANT U-BOX 54 ATPUB54;PLANT U-BOX 54 PUB54	plant U-box 54;(source:Araport11)	501711916,501732478,501739720,501778926	14966217,18393940,20736450,29490615	-0.262454	0.668645	1.7135, 0.5635, 0.2135, -0.5865, -1.2265, -0.3765, -0.7765, -0.7365, -1.3365, -0.1565, 0.7835, 0.5435, -0.2165, -1.3965, -0.3465, -0.3965, -0.5065, -0.2965, -1.02103, -0.16103, -0.25103, -0.26103, -0.23103, -0.35103, 0.328974, -0.15103, -0.45103,	0.17163	0.0457049	0.17, 0.2, 0.22, 0.24, 0.13, 0.13, 0.18, 0.21, 0.21, 0.27, 0.14, 0.13, 0.15, 0.14, 0.13, 0.2, 0.1, 0.14, 0.186, 0.172, 0.184, 0.121, 0.139, 0.18, 0.147, 0.136, 0.279,	0.827868	1.26587	2.40625, 0.20625, 0.68625, 0.18625, 0.64625, -0.45375, -0.34375, -0.37375, -1.04375, 1.38625, 0.64625, 1.98625, 0.53625, 0.35625, -0.23375, -0.43375, -0.86375, 2.30625, -1.1109, 1.262103, 3.621103, 2.814103, 1.080103, 1.657103, 2.268103, 0.890103, 2.268103,
AT1G04510	MOS4-ASSOCIATED COMPLEX 3A MAC3A	MOS4-ASSOCIATED COMPLEX 3A MAC3A, PUB59	Encodes MAC3A, a U-box proteins with homology to the yeast and human E3 ubiquitin ligase Prp19. Associated with the MOS4-Associated Complex (MAC). Involved in plant innate immunity.	501713126,501714224,501714224,501714224,501718481,501718481,501718481,501725142,501725142,501727266,501733455,501739803,501739720,501777081,501778778,501727982,501727982	15452276,15496452,15496452,15496452,16502469,16502469,16502469,18552200,18552200,18650403,19629177,20687615,20736450,28947490,29437988,,	0.728603	1.31302	-0.4945, 0.7955, 0.8055, -0.8745, 3.4255, 1.3755, 2.5255, -0.0345, 1.7055, -0.2545, 1.5555, 1.5855, -0.0745, 2.5055, -0.5845, -0.3045, -0.2145, -0.4845, -0.6045, 2.1655, 1.1155, -0.0845, -0.5045, 0.7955, -0.5245, 0.4655, 1.1955, -0.0145, 4.1655,	0.169552	0.0629788	0.242, 0.132, 0.233, 0.124, 0.233, 0.079, 0.092, 0.122, 0.136, 0.154, 0.17, 0.188, 0.076, 0.168, 0.274, 0.148, 0.223, 0.117, 0.113, 0.161, 0.219, 0.079, 0.102, 0.188, 0.176, 0.313, 0.172, 0.258, 0.225,	0.263848	1.5372	0.2624, 0.1474, -0.8456, 1.7624, 1.6564, -0.2576, 0.9954, 1.6294, 0.1054, 0.2354, 0.6224, -0.2336, 2.4414, 0.5204, -1.9826, 0.6364, -1.1566, 1.8124, 0.6884, -0.7846, -2.6196, 2.1624, 1.3124, 3.4414, 1.0454, -3.1016, -1.1016, 0.2424, -1.9846,
AT1G09650			F-box and associated interaction domains-containing protein;(source:Araport11)	501722879,501722879,501735607,501739720	17722694,17722694,20032078,20736450	-0.0727232	0.732469	0.11075, -0.15925, -0.10925, -0.22925, -0.27925, 0.10075, 0.10075, -0.11925, -1.01925, -0.23925, 0.68075, 0.71075, 0.58075, 0.45075, 0.54075, 0.27075, 0.60075, 0.71075, -0.23925, 0.58075, 0.55075, 1.22075, 1.21075, 0.67075, 0.57075, 0.35075, 1.29075, 0.42075, 1.99075, 1.22075, 0.77075, 0.81075, 0.79075, 0.48075, 1.04075, 0.55075, -0.10925, 0.09075, 0.94075, -0.562105263, -1.152105263, -1.11210526…	0.169139	0.0700093	0.118, 0.135, 0.141, 0.113, 0.091, 0.133, 0.146, 0.167, 0.345, 0.114, 0.114, 0.203, 0.135, 0.142, 0.104, 0.093, 0.139, 0.151, 0.139, 0.171, 0.199, 0.29, 0.288, 0.081, 0.214, 0.21, 0.248, 0.213, 0.326, 0.187, 0.118, 0.081, 0.133, 0.102, 0.2, 0.409, 0.182, 0.156, 0.138, 0.189, 0.131, 0.198, 0.2, 0.112, 0.107, 0.139, 0.198, 0.142, 0.075, 0.186, 0.112, 0.228, 0.146, 0.271, 0.174, 0.16, 0.155, 0.159, …	1.67407	0.945255	1.702775, 2.208775, 2.303775, 2.127775, 1.723775, 1.859775, 1.710775, 1.712775, -1.069225, 2.177775, 1.029775, 0.494775, 0.742775, 0.914775, 0.548775, 1.010775, 1.602775, 0.993775, 1.011775, 1.483775, 1.779775, 1.323775, 1.345775, 0.763775, 0.095775, 0.789775, 1.281775, 1.643775, 1.258775, 1.884775, 1.257775, 1.377775, 0.884775, 1.036775, -1.014225, 2.565775, 1.784775, 1.011775, 1.854775, 3.11378…
AT1G10560	PLANT U-BOX 18 PUB18	PLANT U-BOX 18 PUB18;ARABIDOPSIS THALIANA PLANT U-BOX 18 ATPUB18	Encodes a protein containing a UND, a U-box, and an ARM domain. This protein has E3 ubiquitin ligase activity based on in vitro assays.	501682506,501710652,501711683,501736468,501739720,501744916,501750315,501773661,501737413	12432076,12946625,14657406,20219281,20736450,21815976,22829319,27956469,	-0.0915	0.441265	0.416, 0.196, 0.016, 0.516, -0.344, 0.116, 0.296, 0.846, 0.436, 0.276, 0.206, -0.244, -0.314, -0.474, -0.254, 0.256, -0.014, -0.234, -0.234, -0.344, 0.016, -0.234, 0.176, 0.926, -0.444, -0.424, -0.074, -0.364, 0.196, 0.696, -0.374, 0.006, 0.066, 0.076, -0.234, -0.494, -0.354, -0.464, -0.804, -0.064, -0.0445, -0.1745, -0.6545, -0.4745, -0.3845, 0.7955, -0.4645, -0.0745, -0.2645, 0.6455, -0.4545, -…	0.155	0.0654339	0.18, 0.13, 0.13, 0.11, 0.21, 0.23, 0.14, 0.1, 0.28, 0.14, 0.12, 0.21, 0.11, 0.11, 0.1, 0.08, 0.14, 0.13, 0.08, 0.15, 0.08, 0.13, 0.14, 0.11, 0.22, 0.13, 0.13, 0.13, 0.15, 0.14, 0.23, 0.14, 0.22, 0.14, 0.15, 0.3, 0.13, 0.13, 0.17, 0.22, 0.132, 0.169, 0.098, 0.101, 0.129, 0.295, 0.129, 0.108, 0.149, 0.457, 0.175, 0.17, 0.148, 0.132, 0.15, 0.142, 0.242, 0.048, 0.093, 0.163,	0.750183	0.981883	1.5535, 1.6235, 0.2335, 2.6635, -0.4965, -0.2165, 1.6435, 2.2835, 1.2035, 0.8335, 0.6735, 0.8835, 0.0735, 0.0635, 0.8235, 1.5535, 1.2435, 1.1135, -0.4465, 0.7435, 2.9735, 1.9035, 1.2535, 0.9235, -0.7365, 0.1635, 0.3335, 0.4335, 1.4335, -0.1065, -0.1865, 2.3335, 0.5735, 0.4535, 1.1935, -1.5965, 0.2135, -0.9165, -1.3265, 0.3335, 1.8704, 0.5314, 0.8434, 1.3664, 1.5114, 0.7054, 0.8024, 2.8404, -0.071…
AT1G10780			F-box/RNI-like superfamily protein;(source:Araport11)	501728802,501734189	18775970,	-0.232428	0.728173	1.621875, 1.051875, -0.396, 0.834, 0.524, -0.146, -0.446, -0.616, -0.796, -0.846, -0.116, -0.156, -0.186, -0.396, -0.206, -0.846, 1.604, 0.344, 1.504, -0.366, -0.486, -0.916, -1.256, -1.206, -0.766, -0.316, -0.756, 0.144, 0.104, -0.876, -0.796, -0.516, -0.476, -0.716, -0.576, -0.396, -0.506, -0.486,	0.165974	0.0521414	0.217, 0.24, 0.17, 0.12, 0.16, 0.16, 0.15, 0.16, 0.19, 0.15, 0.21, 0.17, 0.24, 0.27, 0.08, 0.16, 0.25, 0.16, 0.15, 0.17, 0.11, 0.11, 0.12, 0.21, 0.09, 0.19, 0.09, 0.1, 0.23, 0.2, 0.19, 0.15, 0.08, 0.13, 0.25, 0.13, 0.12, 0.23,	2.00444	1.04927	1.5513125, 1.1713125, -0.174, 2.916, -0.134, 0.786, 2.896, 2.436, 2.126, 1.706, 1.596, 2.616, 2.126, 0.716, 2.476, 1.776, 4.776, 2.566, 4.226, 3.026, 0.546, 2.436, 1.046, 0.846, 2.386, 1.036, 2.596, 3.016, 1.676, 1.016, 1.796, 3.416, 2.376, 2.056, 2.006, 2.406, 2.436, 1.896,
AT1G11620			F-box and associated interaction domains-containing protein;(source:Araport11)	501727972		0.474374	0.753853	0.871875, 0.241875, 1.251875, -0.468125,	0.249	0.0753083	0.329, 0.212, 0.292, 0.163,	0.574313	1.1719	0.6793125, 0.5103125, 1.9863125, -0.8786875,
AT1G12710	PHLOEM PROTEIN 2-A12 PP2-A12	PHLOEM PROTEIN 2-A12 AtPP2-A12;PHLOEM PROTEIN 2-A12 PP2-A12	This gene is predicted to encode a protein with a PP2 domain. This domain in present in lectins found in squash and cucumber, suggesting that this protein could potentially have carbohydrate binding capabilities.	501682998,501721538,501739720,501776308	12529520,17521445,20736450,28724081	0.138445	0.913546	-0.642105263, -0.062105263, -0.182105263, -0.432105263, -0.542105263, 0.157894737, 0.3635, 1.0335, -0.716, -0.486, -0.606, -1.206, -0.566, -0.716, 0.404, -0.866, 2.109166667, 1.349166667, 0.589166667, 0.129166667, -0.980833333, 1.219166667, 1.249166667, 0.279166667, -0.500833333, 1.769166667, 2.339166667, 0.509166667, -0.940833333, 0.969166667, 2.749166667, 0.369166667, -0.960833333, -2.000833333…	0.205392	0.108997	0.127, 0.136, 0.119, 0.104, 0.235, 0.162, 0.163, 0.163, 0.16, 0.12, 0.25, 0.11, 0.19, 0.17, 0.29, 0.18, 0.498, 0.296, 0.331, 0.316, 0.191, 0.275, 0.245, 0.443, 0.464, 0.329, 0.327, 0.277, 0.204, 0.508, 0.375, 0.276, 0.242, 0.287, 0.429, 0.286, 0.261, 0.376, 0.308, 0.305, 0.31, 0.142, 0.148, 0.094, 0.068, 0.197, 0.074, 0.089, 0.119, 0.119, 0.127, 0.152, 0.086, 0.185, 0.131, 0.108, 0.133, 0.172, 0.…	1.80377	1.55448	1.628789474, 2.080789474, 2.166789474, 2.687789474, 2.376789474, 2.533789474, 0.4584, 0.6444, 3.136, 3.606, 1.256, 1.566, 3.756, 2.776, 0.946, 2.416, 2.325016667, 2.349016667, 1.205016667, 1.464016667, 2.122016667, 1.907016667, 4.962016667, 1.434016667, 0.367016667, 3.728016667, 6.335016667, 4.329016667, 5.012016667, 3.059016667, 4.623016667, 3.776016667, 3.178016667, 2.707016667, 1.921016667, 3.…
AT1G12820	AUXIN SIGNALING F-BOX 3 AFB3	AUXIN SIGNALING F-BOX 3 AFB3	Auxin receptor involved in primary and lateral root growth inhibition in response to nitrate. Target of miR393. Induced by nitrate in primary roots.	501712283,501712847,501713273,501714558,501719531,501718824,501718506,501718864,501721100,501721491,501721388,501721538,501723955,501724097,501727337,501729269,501735661,501736206,501738371,501742141,501742500,501746890,501750224,501756181,501759366,501761656,501768454,501768909,501771854,501737349,501727741,501727846	15078335,15258262,15345049,15632092,15917797,15992545,16489130,16627744,17360645,17400893,17435085,17521445,18192068,18287490,18628351,19106375,20018756,20142497,20661628,21408147,21482761,22042293,22658222,23847199,24642706,25329496,26942722,27040841,27696021,,,	0.318276	0.640022	-0.358125, -0.368125, 0.201875, -0.168125, -0.468125, -0.718125, -0.048125, -0.588125, 0.211875, 1.341875, 0.3735, 1.6535, 0.5335, 0.6835, 1.0335, 1.7235, 0.2635, 0.3235, 1.4135, -0.1465, 0.2235, 0.5335, -0.1065, 0.2335, 0.3335, 0.1735, 0.4535, 0.1735,	0.149321	0.0569041	0.162, 0.075, 0.14, 0.158, 0.145, 0.161, 0.126, 0.205, 0.347, 0.233, 0.158, 0.134, 0.125, 0.107, 0.105, 0.139, 0.115, 0.262, 0.111, 0.071, 0.146, 0.146, 0.113, 0.148, 0.099, 0.139, 0.182, 0.129,	0.366404	0.853857	0.8483125, -0.1176875, 0.0853125, 1.7123125, -0.1686875, 0.1903125, 0.0173125, -0.3326875, -0.9386875, 1.1013125, 0.0574, -0.3936, 1.4414, 0.0634, 1.6264, 0.6534, 1.5644, 0.1924, -0.2816, 1.4534, -0.9736, -0.5436, 0.3124, -0.0826, 0.0954, 1.2404, -0.6206, 2.0574,
AT1G13570			F-box/RNI-like superfamily protein;(source:Araport11)	501728802,501753994	18775970,23517122	0.2245	0.439993	0.3035, 0.1935, 0.2535, 1.0835, 0.2235, -0.1165, -0.3565, 1.1335, 0.8935, 0.7235, -0.0465, 0.1535, -0.7065, -0.2365, -0.1065, 0.0535, -0.2765, 0.3335, 0.3535, 0.3135, 0.3535, 0.4435, 0.3935, 0.8635, 0.5035, 0.9735, 0.6535, 0.3435, 0.1235, 0.4135, 0.4835, 0.0535, 0.2335, -0.0265, -0.4765, -0.4365, 0.3735, -0.5965, 0.1835, -0.0465,	0.17595	0.0601971	0.246, 0.168, 0.183, 0.233, 0.146, 0.097, 0.185, 0.405, 0.219, 0.132, 0.204, 0.188, 0.267, 0.241, 0.214, 0.129, 0.271, 0.159, 0.12, 0.189, 0.148, 0.114, 0.203, 0.12, 0.187, 0.187, 0.169, 0.17, 0.201, 0.105, 0.114, 0.217, 0.151, 0.135, 0.097, 0.094, 0.195, 0.156, 0.115, 0.164,	1.0357	1.52561	-1.1796, 2.2324, 0.8184, 1.2534, 2.6634, -0.5626, -0.6176, -1.0486, 2.0644, 1.7514, -1.5246, 0.5104, -0.4076, 0.6054, 0.0374, -0.7996, 0.0754, 4.5534, 3.9604, -0.0526, 0.8074, 1.5924, -0.1656, 3.3954, 0.8844, 1.4064, 3.6234, 0.0534, -0.4106, 2.1894, 1.6524, -0.2546, 3.5584, 1.0664, 1.4004, 2.0674, -0.8696, 2.4294, 1.2624, 1.4064,
AT1G14330			Galactose oxidase/kelch repeat superfamily protein;(source:Araport11)	501727266,501741056	18650403,21119043	0.425643	0.984389	3.828421053, 0.158421053, 1.068421053, 0.188421053, 0.948421053, 0.958421053, 0.418421053, 1.168421053, -0.151578947, -0.421578947, 0.238421053, 0.238421053, -0.231578947, -0.091578947, -0.111578947, -0.071578947, -0.161578947, -0.311578947,	0.182222	0.075785	0.3, 0.088, 0.245, 0.261, 0.319, 0.135, 0.185, 0.213, 0.109, 0.188, 0.133, 0.242, 0.148, 0.269, 0.142, 0.13, 0.08, 0.093,	2.75308	0.771077	3.914473684, 3.338473684, 3.023473684, 1.952473684, 1.459473684, 3.962473684, 3.208473684, 3.156473684, 2.500473684, 1.908473684, 2.854473684, 3.598473684, 3.301473684, 2.178473684, 2.763473684, 2.161473684, 1.446473684, 2.826473684,
AT1G15670	KISS ME DEADLY 2 KMD2	KELCH REPEAT F-BOX 1 KFB01;KISS ME DEADLY 2 KMD2	Encodes a member of a family of F-box proteins, called the KISS ME DEADLY (KMD) family, that targets type-B ARR proteins for degradation and is involved in the negative regulation of the cytokinin response. Also named as KFB1, a member of a group of Kelch repeat F-box proteins that negatively regulate phenylpropanoid biosynthesis by targeting the phenypropanoid biosynthesis enzyme phenylalanine a…	501713273,501718506,501719433,501727266,501728685,501754943,501757837	15345049,16489130,16766691,18650403,18805951,23720308,24363316	-0.212912	0.700952	0.629333333, 0.189333333, 0.369333333, 2.119333333, 0.289333333, 0.269333333, 0.379333333, 0.819333333, 0.549333333, 1.289333333, 2.719333333, -0.280666667, -0.010666667, 0.359333333, -0.280666667, 1.089333333, -0.020666667, -0.360666667, 0.029333333, -0.350666667, 0.139333333, -0.620666667, 0.359333333, -0.260666667, -0.742105263, -0.972105263, -0.652105263, -0.702105263, -0.872105263, -0.912105…	0.176456	0.0633845	0.078, 0.175, 0.146, 0.119, 0.253, 0.14, 0.171, 0.119, 0.178, 0.236, 0.271, 0.436, 0.159, 0.245, 0.24, 0.357, 0.106, 0.11, 0.145, 0.239, 0.122, 0.097, 0.156, 0.194, 0.198, 0.151, 0.128, 0.143, 0.184, 0.091, 0.116, 0.124, 0.189, 0.238, 0.111, 0.14, 0.096, 0.134, 0.129, 0.12, 0.126, 0.098, 0.171, 0.222, 0.229, 0.152, 0.075, 0.147, 0.085, 0.111, 0.244, 0.127, 0.133, 0.194, 0.236, 0.184, 0.251, 0.212…	0.802382	1.49064	1.320066667, 0.955066667, 1.466066667, 6.224466667, -0.717933333, 1.288066667, 0.245066667, 3.040066667, 0.061066667, -0.980933333, 1.292066667, -1.618933333, -1.097933333, 0.251066667, -0.697933333, 0.826066667, 2.396066667, 0.541066667, -0.251933333, -0.730933333, 0.759066667, -0.384933333, 0.270066667, 1.116066667, 1.076789474, 0.355789474, 2.725789474, 1.938789474, 0.590789474, 1.883789474, 0…
AT1G15680	PUB13	PUB13	F-box family protein;(source:Araport11)	501712830,501727972	15266052,	0.541055	0.473488	0.13825, 0.83825, 0.88825, -0.00175, 0.32825, 0.73825, 0.21825, 1.29825, 1.26825, 1.17825, 0.33825, 0.40825, -0.03175, 0.11825, 1.53825, 0.00825, -0.18175, 1.30825, 0.91825, 0.27825, 1.15825, 0.99825, 0.45825, 0.19825, 0.97825, 0.08825, 0.50825, 0.18825, 0.91825, 0.12825, 0.25825, 2.09825, 0.97825, 0.69825, 0.08825, 0.54825, -0.26175, 0.17825, 1.26225, 0.09225, 1.20225, -0.08775, 0.02225, -0.0577…	0.201299	0.075418	0.138, 0.168, 0.13, 0.107, 0.196, 0.139, 0.193, 0.191, 0.265, 0.167, 0.181, 0.079, 0.128, 0.086, 0.333, 0.296, 0.263, 0.172, 0.173, 0.141, 0.273, 0.243, 0.18, 0.233, 0.289, 0.262, 0.225, 0.227, 0.081, 0.135, 0.251, 0.171, 0.275, 0.151, 0.154, 0.265, 0.129, 0.157, 0.275, 0.17, 0.407, 0.153, 0.12, 0.101, 0.178, 0.165, 0.228, 0.134, 0.157, 0.204, 0.23, 0.143, 0.133, 0.195, 0.181, 0.216, 0.115, 0.129…	0.462823	1.27781	-0.727925, -1.076925, -0.374925, -0.725925, 0.959075, -1.447925, -0.813925, 0.161075, -2.860925, 0.669075, 1.115075, -1.307925, 0.148075, -0.508925, -0.329925, -1.068925, -2.706925, 0.049075, 0.169075, 2.042075, 0.416075, 2.352075, 1.318075, 1.686075, 2.045075, 0.707075, 1.913075, 1.576075, 2.952075, -0.034925, -1.265925, -0.747925, -0.015925, 1.114075, -0.506925, -0.696925, 0.690075, 0.423075, 0…
AT1G16250			Galactose oxidase/kelch repeat superfamily protein;(source:Araport11)	501711234	14576160	0.475167	0.250872	0.8435, 0.3535, 0.0835, 0.5535, 0.4735, 0.5435,	0.164	0.0179444	0.185, 0.159, 0.136, 0.178, 0.172, 0.154,	0.448733	0.543739	1.0804, 0.4304, 0.9664, -0.2536, 0.5704, -0.1016,
AT1G19070			F-box family protein;(source:Araport11)	501724502	18426585	0.522125	0.675033	0.73825, 0.05825, 0.56825, 0.18825, 0.52825, 0.39825, -0.16175, 0.16825, 0.50825, 0.63825, 0.07825, -0.13175, -0.03175, 1.16825, 0.09825, 0.04825, -0.16175, -0.28175, 0.09825, 0.66825, 1.81825, 2.39825, 2.42825, 2.11825, 0.95825, 3.17825, 1.39825, 1.26825, 0.75825, 2.44825, 0.82825, -0.15175, 0.38825, 0.63825, -0.39175, 0.66825, 0.54825, 0.59825, 0.82825, 1.04825, -0.20775, 0.28225, -0.15775, 0.1…	0.189513	0.0554058	0.186, 0.242, 0.164, 0.144, 0.199, 0.161, 0.254, 0.279, 0.154, 0.281, 0.32, 0.151, 0.172, 0.115, 0.187, 0.23, 0.197, 0.276, 0.247, 0.217, 0.218, 0.301, 0.278, 0.218, 0.183, 0.272, 0.209, 0.216, 0.122, 0.276, 0.254, 0.247, 0.139, 0.137, 0.143, 0.266, 0.27, 0.19, 0.182, 0.263, 0.33, 0.157, 0.127, 0.069, 0.11, 0.151, 0.153, 0.183, 0.204, 0.157, 0.168, 0.196, 0.225, 0.153, 0.145, 0.162, 0.085, 0.196,…	1.12786	1.20105	1.407075, -0.488925, 1.684075, 1.076075, 0.876075, 0.807075, -0.148925, 1.478075, 1.268075, 2.447075, -1.166925, -0.445925, -1.317925, 2.200075, -0.287925, -1.449925, 0.280075, 0.284075, -1.659925, 1.009075, 2.655075, 4.123075, 2.938075, 1.822075, 2.808075, 1.780075, 2.666075, 1.425075, 2.628075, 2.140075, 0.544075, -1.565925, 0.430075, 1.327075, 0.885075, 2.380075, 1.260075, 1.701075, 1.990075, …
AT1G19160			F-box family protein;(source:Araport11)			0.0406874	0.0745327	0.055421053, 0.096421053, 0.060421053, -0.032578947, -0.080578947, 0.142421053, 0.118421053, -0.046578947, -0.077578947, 0.063421053, 0.004421053, 0.087421053, 0.064421053, 0.143421053, 0.011421053,	0.264267	0.0745323	0.279, 0.32, 0.284, 0.191, 0.143, 0.366, 0.342, 0.177, 0.146, 0.287, 0.228, 0.311, 0.288, 0.367, 0.235,	0.403839	0.974148	-0.452894737, -1.433894737, 1.221105263, 0.297105263, 2.310105263, 0.573105263, 1.660105263, 0.717105263, 0.770105263, -0.318894737, 0.407105263, -1.168894737, 0.458105263, 0.531105263, 0.487105263,
AT1G19460			Galactose oxidase/kelch repeat superfamily protein;(source:Araport11)			0.277825	0.593245	0.47075, -0.00925, 0.11075, -0.03925, 0.08075, 0.01075, 0.19075, -0.31925, 0.13075, 0.47075, 0.96075, 0.59075, 0.28075, 0.58075, 0.34075, -0.17925, 0.57075, 0.64075, 0.50075, 0.77075, 1.70075, 0.44075, 0.18075, -0.60925, 2.23075, 0.30075, 0.57075, 1.11075, 0.20075, 0.37075, 0.06075, 1.21075, 0.80075, 0.16075, 0.71075, 0.60075, -0.20925, 0.16075, 0.42075, 0.92075, 0.874102564, 0.624102564, 0.38410…	0.160276	0.0541463	0.131, 0.137, 0.075, 0.115, 0.08, 0.148, 0.108, 0.148, 0.144, 0.125, 0.154, 0.118, 0.098, 0.194, 0.093, 0.106, 0.142, 0.131, 0.161, 0.102, 0.194, 0.281, 0.292, 0.271, 0.265, 0.153, 0.158, 0.141, 0.223, 0.101, 0.16, 0.202, 0.244, 0.224, 0.147, 0.232, 0.119, 0.196, 0.241, 0.116, 0.127, 0.238, 0.19, 0.159, 0.136, 0.108, 0.222, 0.121, 0.197, 0.095, 0.104, 0.185, 0.138, 0.13, 0.222, 0.142, 0.133, 0.17…	1.20448	0.931623	2.545775, 2.185775, 1.364775, 1.554775, 1.311775, 2.408775, 1.651775, 1.324775, 2.049775, 2.459775, 1.066775, 1.381775, 1.253775, 1.926775, 1.339775, 0.894775, 2.319775, 2.323775, 0.524775, 2.586775, 2.134775, -0.284225, 0.394775, 0.830775, 2.467775, 1.039775, -0.524225, -0.341225, 0.731775, 0.413775, 0.286775, -0.916225, 1.249775, -0.345225, 0.870775, 1.377775, -0.601225, 1.359775, 1.451775, 0.9…
AT1G20780	SENESCENCE-ASSOCIATED E3 UBIQUITIN LIGASE 1 SAUL1	PLANT U-BOX 44 PUB44;ARABIDOPSIS THALIANA PLANT U-BOX 44 ATPUB44;SENESCENCE-ASSOCIATED E3 UBIQUITIN LIGASE 1 SAUL1	Encodes a protein containing a U-box and an ARM domain. Homozygous mutant seedlings have a seedling lethal phenotype with widespread cell death lesions throughout the cotyledons and roots.	501682506,501710652,501711683,501722708,501725140,501729985,501742924,501743540,501750086,501759504,501766630,501768379,501734387,501734535	12432076,12946625,14657406,17644812,18552232,19309463,20956359,21738636,22706448,24600457,26505534,26910207,,	-0.157	0.269059	0.0155, -0.3045, -0.2345, -0.5545, -0.3645, -0.0645, -0.0745, 0.3255,	0.152	0.0526009	0.113, 0.154, 0.09, 0.243, 0.109, 0.174, 0.205, 0.128,	1.48078	0.858444	1.1344, 1.6854, 2.7754, 0.3224, 1.1904, 1.7734, 2.4334, 0.5314,
AT1G20800			F-box family protein	501736447	20226671	1.01647	1.43615	0.02825, 6.60825, 0.41825, 5.24825, 0.61825, 0.37825, 0.02825, 0.40825, 0.07825, 0.70825, 5.68825, 0.44825, 0.75825, 1.24825, 0.29825, -0.31175, 0.32825, 0.85825, 2.00825, 3.60825, 2.18825, 1.05825, 0.20825, 1.15825, 1.34825, 2.11825, 3.17825, 1.84825, 0.03825, 0.09825, 1.03825, 0.00825, 0.13825, 0.17825, 1.31825, 0.54825, 0.49825, 0.68225, 0.58225, 0.06225, 1.04225, 0.23225, -0.13775, 0.10225, -…	0.218582	0.100153	0.346, 0.603, 0.223, 0.579, 0.242, 0.291, 0.151, 0.258, 0.366, 0.167, 0.474, 0.276, 0.194, 0.281, 0.192, 0.098, 0.283, 0.153, 0.251, 0.23, 0.152, 0.274, 0.225, 0.196, 0.212, 0.156, 0.238, 0.117, 0.156, 0.253, 0.232, 0.174, 0.192, 0.082, 0.185, 0.14, 0.214, 0.182, 0.171, 0.207, 0.218, 0.1, 0.186, 0.144, 0.162, 0.218, 0.17, 0.137, 0.23, 0.218, 0.191, 0.144, 0.194, 0.185, 0.109,	-0.112176	1.14091	1.174075, -0.330925, -1.986925, 1.434075, -3.185925, -0.015925, 0.931075, -0.426925, -0.792925, 1.790075, 1.160075, -1.323925, -0.222925, -0.490925, 0.547075, -0.229925, 1.010075, -0.526925, 0.921075, 0.605075, 0.238075, -0.333925, 0.458075, -0.174925, 1.240075, 2.424075, 2.262075, -0.484925, -0.514925, -2.267925, -0.192925, 0.195075, -0.026925, -1.133925, 0.190075, -0.892925, 0.954075, -0.136525…
AT1G20940			F-box family protein;(source:Araport11)	501739720	20736450	0.25075	0.505999	0.18075, 0.28075, -0.11925, 0.29075, -0.02925, -0.43925, -0.39925, 0.49075, 0.29075, -0.88925, 1.36075, 0.89075, 0.09075, -0.13925, 0.29075, 1.21075, 0.21075, 0.47075, 1.23075, 0.61075, 0.40075, 0.42075, 0.67075, -0.10925, -0.30925, 0.03075, -0.30925, 0.27075, 0.17075, 0.40075,	0.162433	0.0466319	0.187, 0.148, 0.199, 0.179, 0.219, 0.17, 0.13, 0.109, 0.193, 0.144, 0.085, 0.097, 0.126, 0.13, 0.234, 0.203, 0.126, 0.096, 0.165, 0.199, 0.118, 0.107, 0.159, 0.134, 0.228, 0.234, 0.184, 0.258, 0.137, 0.175,	1.16861	0.844963	1.690775, 1.418775, -0.037225, 1.388775, 1.697775, 1.024775, 0.816775, 1.118775, 0.129775, 1.684775, 2.769775, 2.238775, 2.096775, 1.437775, 0.219775, 1.566775, 0.877775, 0.957775, 1.782775, 0.269775, 1.311775, 1.005775, 3.407775, 0.078775, 1.557775, 1.402775, 0.486775, 0.381775, 0.589775, -0.316225,
AT1G21410	SKP2A	SKP2A	AtSKP2;1 is a homolog of human SKP2, the human F-box protein that recruits E2F1. Contains an F-box motif at the N-terminal region and a C-terminal Leu-rich repeat domain. Forms part of an E3-ubiquitin-ligase SCF (Skp1, cullin, F-box) complex and recruits phosphorylated AtE2Fc, a transcriptional factor that might play a role in cell division and during the transition from skotomorphogenesis to pho…	501682926,501682926,501718506,501719703,501732250,501727266,501733781,501753008,501734508,501722103	12468727,12468727,16489130,16920782,18036202,18650403,19704565,23226441,,	-0.1995	0.327197	-0.1645, -0.0845, -0.5145, -0.3345, -0.1745, -0.2345, -0.4245, -0.9145, -0.7445, -0.3445, 0.4555, -0.4445, 0.3755, 0.0055, 0.0155, -0.2545, -0.1645, 0.0255, -0.0745, 0.0055,	0.1758	0.0593966	0.19, 0.192, 0.323, 0.199, 0.132, 0.212, 0.214, 0.247, 0.244, 0.237, 0.116, 0.113, 0.089, 0.177, 0.109, 0.157, 0.126, 0.147, 0.171, 0.121,	1.74555	0.913033	1.6021, 1.8061, 0.7731, 1.5041, 2.2761, 0.8271, 1.3231, -1.0129, 0.7541, 2.0491, 2.3981, 1.9721, 3.4091, 2.2561, 1.7371, 2.0691, 2.3161, 2.2931, 2.1831, 2.3751,
AT1G21760	F-BOX PROTEIN 7 FBP7	F-BOX PROTEIN 7 ATFBP7;F-BOX PROTEIN 7 FBP7	This gene is predicted to encode an F-box protein that is evolutionarily conserved between Arabidopsis and other eukaryotes including S.cerevisiae and humans. It may play a role in regulating translation under conditions of temperature stress. FBP7 transcript levels are increased at high and low temperatures. The mRNA is cell-to-cell mobile.	501681833,501707007,501720728,501723106,501728802,501739720,501766236	12169696,12795696,17240087,17885809,18775970,20736450,27247031	0.0715815	0.431121	-0.030666667, -0.200666667, 0.669333333, 0.669333333, 0.099333333, -0.230666667, -0.240666667, -0.140666667, -0.290666667, 0.209333333, 0.179333333, 0.859333333, 0.269333333, 0.219333333, 0.699333333, 0.699333333, 0.299333333, -0.060666667, 1.269333333, -0.240666667, -0.880666667, -0.240666667, -0.610666667, 0.099333333, -0.210666667, -0.040666667, -0.280666667, -0.270666667, 0.009333333, 0.14933…	0.184375	0.0656352	0.152, 0.312, 0.296, 0.266, 0.167, 0.149, 0.243, 0.183, 0.177, 0.099, 0.19, 0.348, 0.316, 0.168, 0.138, 0.148, 0.165, 0.15, 0.303, 0.173, 0.128, 0.106, 0.132, 0.089, 0.097, 0.183, 0.133, 0.181, 0.197, 0.18, 0.128, 0.217, 0.179, 0.155, 0.268, 0.163, 0.238, 0.191, 0.093, 0.174,	0.0255167	0.930149	0.795066667, -1.752933333, -0.267933333, -0.703933333, -0.252933333, -0.283933333, -2.051933333, 0.239066667, -0.617933333, 0.806066667, -0.610933333, -0.245933333, -1.066933333, -0.418933333, -0.143933333, 1.695066667, 0.412066667, 0.891066667, 0.403066667, 0.701066667, -0.531933333, 1.380066667, 0.529066667, -0.562933333, 0.049066667, 0.788066667, 0.027066667, -0.380933333, -0.429933333, 2.0480…
AT1G22040			Galactose oxidase/kelch repeat superfamily protein;(source:Araport11)	501710157,501710157,501711234,501727266,501739720	12912986,12912986,14576160,18650403,20736450	0.1245	0.465134	-0.337, -0.687, -0.417, -0.367, -0.597, -0.007, -0.357, -0.217, -0.427, 0.213, 0.413, 0.023, -0.047, -0.357, -0.187, -0.327, -0.157, -0.107, -0.147, -0.307, -0.027, 0.153, -0.137, -0.707, 0.113, 0.013, -0.137, -0.347, -0.497, 0.133, -0.297, -0.207, -0.357, -0.247, -0.037, -0.337, -0.147, -0.217, -0.137, -0.207, 0.26475, 1.07475, 0.48475, 0.15475, 0.05475, 0.01475, 0.45475, 1.15475, -0.33525, 0.45…	0.165392	0.0531545	0.135, 0.094, 0.151, 0.215, 0.21, 0.194, 0.255, 0.205, 0.155, 0.112, 0.189, 0.069, 0.102, 0.159, 0.191, 0.132, 0.129, 0.107, 0.052, 0.076, 0.154, 0.133, 0.161, 0.159, 0.184, 0.121, 0.131, 0.226, 0.127, 0.181, 0.164, 0.118, 0.184, 0.135, 0.1, 0.198, 0.099, 0.108, 0.111, 0.167, 0.197, 0.276, 0.105, 0.173, 0.229, 0.178, 0.101, 0.146, 0.137, 0.165, 0.257, 0.157, 0.149, 0.143, 0.15, 0.213, 0.188, 0.15…	0.993117	0.849821	1.167975, 1.149975, 1.234975, 1.963975, 0.558975, 1.944975, 1.064975, 2.752975, 1.469975, 1.296975, 1.806975, 0.622975, 0.555975, 1.129975, 0.881975, 0.536975, 1.453975, 1.774975, 1.658975, 2.141975, 1.557975, 0.603975, 1.411975, 1.171975, 0.092975, 1.793975, 1.626975, 0.802975, 1.300975, 1.771975, 1.253975, 2.469975, -0.047025, 2.445975, 0.845975, 1.275975, 1.853975, 1.829975, 1.512975, 2.697975…
AT1G22220	AUXIN UP-REGULATED F-BOX PROTEIN 2 AUF2	AUXIN UP-REGULATED F-BOX PROTEIN 2 AUF2	F-box family protein;(source:Araport11)	501718506,501744988	16489130,21653785	0.588276	0.705585	0.94825, 2.51825, 1.00825, -0.17175, 0.52825, -0.03175, 0.94825, -0.20175, 0.42825, 1.00825, 3.56825, 1.45825, 1.25825, 0.12825, 1.39825, 0.56825, 0.02825, 1.63825, 1.86825, 1.17825, 0.84825, 0.23825, 0.70825, 0.89825, 1.49825, 1.24825, -0.46175, 1.35825, 0.66825, 0.40825, 0.11825, 0.82825, -0.04175, 0.81825, 0.54825, 0.50825, 0.52825, 0.65825, 0.56825, 0.83825, 0.51225, 0.19225, 0.13225, 0.09225…	0.193769	0.0683957	0.234, 0.149, 0.298, 0.295, 0.235, 0.267, 0.148, 0.241, 0.171, 0.127, 0.132, 0.182, 0.122, 0.233, 0.211, 0.205, 0.109, 0.197, 0.106, 0.161, 0.176, 0.172, 0.174, 0.149, 0.132, 0.17, 0.143, 0.11, 0.092, 0.151, 0.152, 0.191, 0.166, 0.151, 0.112, 0.114, 0.104, 0.105, 0.161, 0.15, 0.259, 0.216, 0.158, 0.139, 0.204, 0.158, 0.19, 0.148, 0.143, 0.164, 0.303, 0.191, 0.256, 0.307, 0.279, 0.126, 0.197, 0.33…	0.733129	1.31236	-1.873925, -1.844925, 0.085075, -0.223925, 0.374075, -1.848925, -1.871925, 1.386075, 0.459075, 1.010075, 4.559075, -2.521925, 0.212075, -0.199925, -0.534925, -0.208925, -1.101925, 1.682075, 0.042075, 0.335075, 1.553075, 0.676075, 1.954075, 2.477075, 2.842075, 3.202075, 1.850075, 1.350075, 1.848075, 1.587075, -0.880925, 2.814075, 0.843075, 0.857075, 2.260075, 0.626075, -0.987925, 1.910075, -0.7009…
AT1G23030	PLANT U-BOX PROTEIN 11 PUB11	PLANT U-BOX PROTEIN 11 PUB11	Encodes a plant U-Box protein that is capable of binding and ubiquitinating MYC2 in vitro, acting as an E3 ligase. Unlike PUB10, its closest homolog in Arabidopsis, it does not appear to play a major role in the MeJA-mediated response.	501710652,501711697,501712377,501722879,501722879,501723106,501728802,501765557	12946625,14651343,15047898,17722694,17722694,17885809,18775970,26163577	-0.0452821	0.562046	0.306, 0.116, 0.156, 0.626, -0.184, 0.246, 0.276, 1.186, 1.706, 1.156, -0.294, -0.304, -0.394, -0.454, -0.134, -0.554, -0.314, 0.546, -0.544, 0.726, -0.514, -0.334, -0.344, -0.554, 0.776, -0.584, 0.026, -0.174, -0.324, -0.104, -0.454, -0.244, -0.324, -0.754, -0.514, -0.324, -0.064, -0.184, -0.644,	0.163462	0.0494745	0.12, 0.25, 0.24, 0.24, 0.17, 0.18, 0.21, 0.11, 0.24, 0.19, 0.14, 0.11, 0.12, 0.12, 0.08, 0.09, 0.18, 0.14, 0.14, 0.18, 0.147, 0.152, 0.202, 0.131, 0.173, 0.242, 0.225, 0.121, 0.162, 0.14, 0.17, 0.17, 0.07, 0.14, 0.21, 0.2, 0.11, 0.24, 0.12,	0.516577	0.958865	1.2735, -0.6165, 0.9635, 0.0235, 0.1335, 0.6435, 0.7835, 2.6835, 1.4635, 1.1335, -0.5665, 0.8035, -0.8565, 0.3635, 1.2335, 0.1935, 1.2635, 1.9235, -0.7565, 3.4735, 0.8435, -0.0465, 0.6635, 0.2035, 0.4335, 0.5035, 0.0035, 1.3135, 0.2935, 0.9435, -0.5765, -0.4165, 0.4635, 0.5635, -0.4865, 0.8735, 0.7135, -1.5865, -0.1165,
AT1G23780			F-box family protein;(source:Araport11)	501707007,501718506,501727266,501750540,501734209	12795696,16489130,18650403,22751308,	0.3815	0.387312	0.6315, 0.0015, 0.6715, 0.2115, 1.0915, 0.4615, 0.8915, -0.1485, 0.4015, 0.3215, 0.4315, 0.2115, 0.5615, -0.1585, -0.3985, 0.6315, 0.5615, 0.1315, 0.9415, 0.1815,	0.1512	0.0401335	0.091, 0.165, 0.114, 0.157, 0.162, 0.144, 0.17, 0.121, 0.184, 0.094, 0.252, 0.182, 0.13, 0.139, 0.199, 0.089, 0.174, 0.154, 0.176, 0.127,	2.36765	1.04877	1.9528, 0.6848, 1.3558, 2.1678, 2.0918, 1.8248, 1.7618, 1.9218, 4.1348, 2.1888, 2.9728, 1.8998, 2.7838, 1.4628, 3.6638, 3.4218, 3.6498, 1.4148, 4.5838, 1.4148,
AT1G26930			Galactose oxidase/kelch repeat superfamily protein;(source:Araport11)	501681862,501681862,501718506,501719365,501719736,501730034,501741056	12154131,12154131,16489130,16786307,16911220,19291320,21119043	0.86225	0.644637	1.24475, 1.22475, 0.14475, 1.39475, 0.71475, 0.59475, 2.20475, 0.83475, 2.01475, 1.02475, 0.20475, -0.20525, 0.29475, 0.42475, 0.30475, 1.08475, 0.92475, 0.75475, 0.30475, 1.75475,	0.1518	0.0513211	0.123, 0.081, 0.097, 0.115, 0.165, 0.098, 0.283, 0.132, 0.143, 0.169, 0.189, 0.087, 0.227, 0.19, 0.115, 0.117, 0.154, 0.179, 0.171, 0.201,	1.39282	1.10156	0.181525, 0.929525, 0.610525, 2.005525, 2.036525, 0.782525, 2.592525, 2.668525, 1.934525, 3.142525, 0.634525, 0.691525, 0.745525, -0.953475, 2.227525, -0.337475, 1.512525, 2.210525, 1.506525, 2.734525,
AT1G27340	LEAF CURLING RESPONSIVENESS LCR	LEAF CURLING RESPONSIVENESS LCR	Encodes a putative F-box protein that is involved in the regulation of leaf morphology.	501714558,501719931,501724037,501728802,501748898,501751081,501753286,501757923,501768978,501780598	15632092,16977334,18305205,18775970,22619471,23000164,23333352,24330668,27067051,30018624	0.160742	0.921035	1.5155, -0.4245, -0.9845, -0.3245, -0.4245, -0.7045, 0.3855, 0.141578947, 2.661578947, 0.411578947, 0.441578947, 0.251578947, 0.221578947, -0.278421053, -0.478421053,	0.1976	0.0611366	0.283, 0.16, 0.156, 0.162, 0.09, 0.159, 0.23, 0.184, 0.229, 0.294, 0.28, 0.147, 0.219, 0.24, 0.131,	1.74643	1.24899	0.720375, 0.711375, -0.045625, -0.032625, 1.480375, 1.000375, 2.451375, 3.031973684, 3.529973684, 1.996973684, 0.592973684, 2.196973684, 3.903973684, 1.853973684, 2.803973684,
AT1G27420			Galactose oxidase/kelch repeat superfamily protein;(source:Araport11)	501711234,501727972	14576160,	-0.107375	0.440713	-0.04175, -0.23175, -0.65175, -0.36175, -0.34175, -0.27175, 0.51825, -0.01175, -0.19175, -0.05175, -0.43175, -0.42175, -0.65175, -0.35175, -0.13175, -0.13175, -0.11175, -0.02175, -0.19175, -0.13175, -0.6305, -0.0605, -0.2505, -0.4605, -0.1505, -0.1505, -0.6505, -0.1205, -0.9405, -0.1405, 0.7895, 0.5895, 0.2095, 0.9595, 0.2395, 0.3295, -0.1205, -0.8805, 0.8095, 0.5495,	0.136775	0.0374778	0.115, 0.131, 0.139, 0.125, 0.148, 0.114, 0.309, 0.127, 0.13, 0.121, 0.122, 0.139, 0.162, 0.128, 0.146, 0.118, 0.152, 0.113, 0.095, 0.104, 0.133, 0.108, 0.147, 0.179, 0.108, 0.146, 0.122, 0.092, 0.116, 0.111, 0.148, 0.207, 0.093, 0.172, 0.15, 0.111, 0.124, 0.166, 0.173, 0.127,	1.40814	0.848346	2.037075, 1.692075, 1.960075, 1.058075, 0.136075, 1.650075, 0.800075, 1.781075, 1.127075, 1.201075, 0.234075, 0.999075, 0.812075, 2.003075, 0.502075, 0.726075, 0.776075, 2.472075, 2.030075, 2.225075, 1.4654, 1.4934, 2.5484, -0.3576, 1.2794, 1.8774, 2.2444, 1.3274, 1.1474, 1.7674, 2.4294, 2.1044, 1.3234, 2.2964, -0.8036, -0.1376, 1.7214, 1.1154, 3.0694, 2.1914,
AT1G27910	PLANT U-BOX 45 PUB45	PLANT U-BOX 45 PUB45;ARABIDOPSIS THALIANA PLANT U-BOX 45 ATPUB45	Encodes a protein containing a UND, a U-box, and an ARM domain. This protein has E3 ubiquitin ligase activity based on in vitro assays.	501710652,501711683,501712942,501725140	12946625,14657406,15231834,18552232	-0.218764	0.465269	-1.03103, -0.20103, -0.62103, 0.088974, -0.47103, 0.058974, 0.358974, -0.26103, -0.59103, -0.13103, -0.04103, 0.058974, -0.37103, 0.048974, -0.71103, -0.11103, -0.16103, 0.088974, 0.358974, -0.15103, -0.3265, -0.4965, -0.0865, -0.5665, -0.9965, 0.9835, 0.9535, -0.1465, 0.1935, -0.3865, -0.5065, -0.5365, -1.0165, -0.8665, 0.3335, -0.1765, -0.6465, 0.2535, -0.2565, -0.6665,	0.145325	0.0368604	0.189, 0.175, 0.184, 0.128, 0.191, 0.169, 0.099, 0.137, 0.131, 0.129, 0.147, 0.169, 0.132, 0.127, 0.125, 0.199, 0.138, 0.281, 0.103, 0.18, 0.15, 0.14, 0.11, 0.11, 0.17, 0.17, 0.12, 0.12, 0.13, 0.11, 0.12, 0.09, 0.11, 0.14, 0.14, 0.11, 0.11, 0.19, 0.17, 0.17,	1.20648	0.97661	-0.3019, -0.2189, -0.9899, 1.423103, -0.8689, 0.703103, 1.901103, 1.437103, 0.167103, 0.278103, 1.469103, 1.910103, 1.816103, 2.530103, 0.832103, 2.279103, 2.130103, 3.009103, 2.039103, 0.399103, -0.11375, 0.95625, 0.54625, 0.71625, 0.16625, 2.45625, 1.96625, 1.39625, 2.06625, 2.33625, 0.77625, 1.07625, 1.01625, 1.62625, 1.76625, 1.66625, 1.49625, 2.77625, 0.81625, 0.80625,
AT1G29340	PLANT U-BOX 17 PUB17	PLANT U-BOX 17 PUB17;ARABIDOPSIS THALIANA PLANT U-BOX 17 ATPUB17	Encodes a protein containing a UND, a U-box, and an ARM domain. This protein has E3 ubiquitin ligase activity. It is required for cell death and full resistance specified by Arabidopsis RPM1 and RPS4 resistance proteins against Pseudomonas syringae pv tomato. The mRNA is cell-to-cell mobile.	501710652,501711683,501712682,501716463,501718732,501721103,501721474,501721462,501727266,501728802,501766236	12946625,14657406,15181213,15894741,16531496,17360592,17408486,17412590,18650403,18775970,27247031	0.13935	0.541554	0.1765, -0.3035, 1.0565, -0.6035, -0.6835, -0.1435, 0.0165, 0.4665, 0.3365, 0.3665, 1.3265, -0.4735, 0.7365, 0.0765, 0.4465, 0.1965, 0.3365, -0.7045, 0.1555, 0.0055,	0.16925	0.0654771	0.21, 0.12, 0.14, 0.18, 0.14, 0.14, 0.18, 0.21, 0.12, 0.18, 0.33, 0.16, 0.24, 0.1, 0.09, 0.12, 0.11, 0.142, 0.316, 0.157,	0.866355	0.908938	0.1057, 2.5067, 0.8197, 0.2027, -0.2983, 1.6617, -0.2033, 0.0617, 0.2257, 1.9327, -0.6873, 0.4127, 0.4107, 1.6937, 1.9157, 1.9617, 1.6447, 0.8094, 0.8034, 1.3474,
AT1G30090			Galactose oxidase/kelch repeat superfamily protein;(source:Araport11)	501716537,501718506,501728685	15937229,16489130,18805951	-0.0896691	0.466381	-0.459666667, -0.279666667, -0.239666667, -0.189666667, -0.249666667, 0.800333333, -0.889666667, -0.429666667, -0.179666667, 0.030333333, 0.560333333, -0.069666667, -0.029666667, -1.169666667, -0.569666667, -0.499666667, -0.479666667, -0.279666667, -0.199666667, -0.059666667, 0.660333333, 0.390333333, 0.060333333, -0.049666667, -0.159666667, 0.180333333, 0.370333333, -0.219666667, -0.039666667, 1…	0.168967	0.0508246	0.199, 0.25, 0.196, 0.125, 0.173, 0.318, 0.244, 0.229, 0.152, 0.162, 0.158, 0.142, 0.155, 0.192, 0.131, 0.17, 0.148, 0.255, 0.116, 0.159, 0.193, 0.125, 0.155, 0.124, 0.149, 0.119, 0.156, 0.175, 0.07, 0.129,	1.21093	1.14009	0.528966667, 0.819966667, 0.354966667, 2.287966667, 1.700966667, 0.733966667, 1.102966667, -1.568033333, 1.505966667, 2.354966667, 2.536966667, 2.245966667, 1.123966667, -0.818033333, 0.677966667, 1.200966667, 1.333966667, 0.742966667, 2.504966667, 2.031966667, 1.560966667, 1.428966667, 1.011966667, 1.311966667, -0.721033333, 1.222966667, 2.151966667, -0.741033333, 1.911966667, 3.784966667,
AT1G30200			F-box family protein;(source:Araport11)	501753994	23517122	0.080875	0.398343	0.45575, 0.42575, 0.05575, 0.54575, 0.23575, 0.18575, 0.57575, 0.73575, 0.40575, 0.65575, 0.47575, -0.12425, -0.00425, -0.14425, 0.41575, -0.34425, -0.57425, -0.42425, -0.09425, -0.14425, 0.79575, 0.46575, 0.04575, 0.43575, 0.20575, 0.40575, 1.00575, 0.57575, -0.03425, 0.60575, 0.17575, -0.17425, -0.03425, -0.32425, 0.39575, -0.36425, 0.25575, -0.40425, 0.32575, 0.16575, 0.0855, -0.1545, -0.1245,…	0.149188	0.0470798	0.142, 0.093, 0.131, 0.11, 0.152, 0.115, 0.101, 0.118, 0.09, 0.125, 0.167, 0.183, 0.116, 0.107, 0.151, 0.103, 0.125, 0.133, 0.167, 0.301, 0.178, 0.133, 0.164, 0.1, 0.149, 0.192, 0.117, 0.083, 0.18, 0.158, 0.075, 0.11, 0.215, 0.148, 0.105, 0.147, 0.131, 0.187, 0.176, 0.189, 0.152, 0.164, 0.167, 0.184, 0.104, 0.172, 0.221, 0.174, 0.081, 0.227, 0.162, 0.161, 0.091, 0.077, 0.082, 0.192, 0.146, 0.144,…	1.11201	1.12725	1.6746, 1.2996, 2.0906, 1.6716, -0.2844, 1.7386, 0.1796, 0.5636, 2.0006, 1.1496, 1.9086, -0.6554, 1.2826, 0.9236, -0.3524, 0.9066, 0.5146, 0.0396, 1.0726, 0.8746, -0.0584, 2.7846, 0.0156, 1.2606, -1.1724, 0.4406, 1.2756, 1.2106, 0.1006, -0.6934, 2.0036, 0.2016, 1.9146, 0.8396, 1.3226, -0.6964, 0.3556, 1.1486, 1.1716, 2.3106, 3.153375, 1.921375, 2.883375, 1.608375, 2.084375, 1.571375, 1.355375, 1.…
AT1G30950	UNUSUAL FLORAL ORGANS UFO	UNUSUAL FLORAL ORGANS UFO	Required for the proper identity of the floral meristem. Involved in establishing the whorled pattern of floral organs, in the control of specification of the floral meristem, and in the activation of APETALA3 and PISTILLATA. UFO is found at the AP3 promoter in a LFY-dependent manner, suggesting that it works with LFY to regulate AP3 expression. UFO may also promote the ubiquitylation of LFY.	4420,4284,3449,2518,2536,2505,2364,1887,1074,893,893,854,516,501683127,501683127,501680320,501679484,501680157,1545999,501681955,501681590,501682184,501683076,501683635,501706031,501706888,501712375,501716340,501717847,501718399,501723026,501724101,501724356,501727472,501729340,501730184,501737971,501749001,501753008,501753289,501757767,501764409,501765428,501774049,501779771,501780496,1546353,15…	7780306,8589630,9016705,9521909,9611175,9628019,9671577,9878633,10528262,10607296,10607296,10624575,10769227,11019805,11019805,11158527,11283333,11526079,11714690,11828022,12050130,12242408,12506008,12609036,12724534,12826617,15047903,15918886,16244866,16412084,17666027,18287201,18332227,18713949,19082619,19386809,20452201,22577962,23226441,23331609,24376756,26106148,26220938,28098947,29743198,29…	-0.284331	0.335227	-0.803333333, -0.583333333, -0.283333333, -0.173333333, -0.143333333, -0.813333333, -0.133333333, -0.443333333, -0.213333333, -0.283333333, 0.306666667, 0.336666667, -0.823333333, -0.603333333, 0.126666667, 0.016666667, -0.303333333, -0.353333333, -0.163333333, -0.353333333,	0.11965	0.0311064	0.117, 0.094, 0.129, 0.179, 0.145, 0.106, 0.151, 0.118, 0.073, 0.071, 0.114, 0.077, 0.167, 0.137, 0.113, 0.107, 0.165, 0.102, 0.133, 0.095,	2.25798	0.574095	2.658277778, 3.092277778, 3.121277778, 2.437277778, 1.551277778, 1.597277778, 2.450277778, 2.103277778, 2.033277778, 1.927277778, 1.566277778, 2.534277778, 1.489277778, 1.358277778, 2.718277778, 2.503277778, 2.255277778, 1.875277778, 3.224277778, 2.663277778,
AT1G31000			F-box/associated interaction domain protein;(source:Araport11)	501739720	20736450	-0.033	0.635427	0.1895, -0.1505, 0.0295, 0.6495, 0.0395, -0.0705, -0.1005, -0.5805, -0.3505, -0.3205, -0.6805, -0.3305, 2.1495, -0.5605, -0.3905, -0.5205, 0.3995, -0.5905, 0.0995, 0.4295,	0.1692	0.0508326	0.215, 0.157, 0.162, 0.156, 0.126, 0.159, 0.186, 0.104, 0.111, 0.144, 0.178, 0.169, 0.342, 0.143, 0.162, 0.198, 0.217, 0.135, 0.182, 0.138,	1.73605	0.619583	1.0846, 1.7906, 2.0356, 2.6436, 1.7766, 2.2846, 1.9556, 2.5356, 1.3586, 2.1046, 0.4356, 1.7416, 2.9906, 1.7676, 0.6816, 1.4166, 1.6296, 1.5976, 1.4946, 1.3956,
AT1G31080			F-box family protein;(source:Araport11)	501711234,501727972	14576160,	-0.350434	0.66033	-0.090666667, 2.199333333, -0.130666667, 0.799333333, 1.009333333, -0.340666667, -0.530666667, -0.650666667, -0.110666667, 0.139333333, 0.419333333, -0.960666667, -0.360666667, -0.450666667, -0.070666667, 0.169333333, 0.949333333, -0.130666667, -0.030666667, 0.349333333, -0.232105263, -1.122105263, -0.632105263, -0.582105263, -0.702105263, -1.022105263, -0.902105263, -0.382105263, -0.732105263, -…	0.153962	0.0373007	0.134, 0.137, 0.225, 0.18, 0.198, 0.132, 0.179, 0.122, 0.117, 0.124, 0.159, 0.174, 0.141, 0.149, 0.152, 0.137, 0.162, 0.115, 0.111, 0.271, 0.112, 0.208, 0.163, 0.177, 0.124, 0.142, 0.109, 0.084, 0.191, 0.112, 0.11, 0.165, 0.093, 0.143, 0.15, 0.122, 0.178, 0.155, 0.168, 0.107, 0.17, 0.168, 0.156, 0.213, 0.176, 0.203, 0.138, 0.134, 0.227, 0.141, 0.165, 0.139, 0.198,	1.53114	1.47144	0.400066667, 5.058066667, 1.439066667, 2.192066667, 0.146066667, -1.174933333, -0.766933333, 0.383066667, -0.440933333, -0.509933333, 0.094066667, -2.216933333, 0.092066667, -0.783933333, 1.310066667, 0.101066667, 0.573066667, 1.989066667, -0.694933333, -1.758933333, 3.188789474, 2.120789474, 2.172789474, 1.013789474, 2.357789474, 1.938789474, 2.407789474, 2.654789474, 1.551789474, 2.863789474, 1…
AT1G31350	KAR-UP F-BOX 1 KUF1	KAR-UP F-BOX 1 KUF1	KAR-UP F-box 1;(source:Araport11)	501707007,501713039,501719406,501736304,501756323,501767804,501779671	12795696,15310832,16776300,20351290,23893171,26754282,29726620	-0.136748	0.469592	-0.475897436, -0.505897436, -0.605897436, -0.065897436, -1.125897436, -0.525897436, -0.685897436, -0.595897436, -0.455897436, -0.259666667, -0.079666667, -0.349666667, 0.060333333, -0.499666667, -0.549666667, -0.389666667, -0.149666667, -0.259666667, 0.140333333, -0.439666667, -0.449666667, -0.129666667, -0.419666667, 0.130333333, 0.210333333, -0.499666667, 0.480333333, 0.140333333, -0.289666667,…	0.154667	0.0522471	0.163, 0.191, 0.113, 0.107, 0.093, 0.119, 0.149, 0.158, 0.168, 0.157, 0.144, 0.153, 0.125, 0.14, 0.118, 0.215, 0.15, 0.184, 0.148, 0.113, 0.107, 0.082, 0.075, 0.158, 0.154, 0.13, 0.162, 0.141, 0.109, 0.245, 0.149, 0.306, 0.188, 0.17, 0.164, 0.116, 0.319, 0.227, 0.122,	1.06075	1.11218	1.130589744, 1.115589744, 2.054589744, 2.667589744, 0.608589744, 3.248589744, 2.298589744, 2.203589744, 2.518589744, 1.429966667, 1.387966667, 0.013966667, 1.859966667, 0.042966667, 0.961966667, 0.663966667, 2.934966667, 1.199966667, 1.940966667, -0.231033333, 0.995966667, 2.444966667, 1.889966667, -0.874033333, 0.608966667, 0.864966667, 1.072966667, 1.956966667, 1.707966667, 0.313966667, 0.81296…
AT1G32020			F-box family protein;(source:Araport11)	501717143	0	0.682579	0.587151	0.191578947, 0.571578947, 2.091578947, 0.971578947, 1.451578947, 0.091578947, -0.288421053, 0.531578947, 0.211578947, 0.911578947, 1.061578947, 0.831578947, 0.941578947, 0.421578947, 0.781578947, 0.291578947, -0.368421053, 0.841578947, 1.351578947, 0.761578947,	0.1839	0.0799512	0.209, 0.139, 0.208, 0.115, 0.17, 0.087, 0.083, 0.17, 0.268, 0.141, 0.175, 0.176, 0.142, 0.459, 0.242, 0.229, 0.163, 0.152, 0.177, 0.173,	2.73742	1.35668	2.175973684, 2.210973684, 0.931973684, 4.299973684, 4.757973684, 3.325973684, 2.163973684, 2.442973684, -0.525026316, 4.593973684, 2.893973684, 3.731973684, 2.387973684, 0.200973684, 3.125973684, 2.565973684, 3.058973684, 3.109973684, 3.427973684, 3.865973684,
AT1G32375			F-box/RNI-like/FBD-like domains-containing protein;(source:Araport11)			0.750968	0.910887	1.3395, -1.2205, 0.7295, 0.8495, 4.8595, -0.1605, 1.5795, 1.0395, 1.1295, 0.0095, 0.5695, 1.1895, -0.3805, 0.6595, 0.5295, 0.3295, 0.8695, 0.7495, 0.280789474, 0.700789474, 0.860789474, 0.090789474, 1.840789474, -0.159210526, 0.310789474, 0.350789474, 1.300789474, 1.090789474, 0.510789474, -0.099210526, 1.310789474, 1.330789474, 0.350789474, 1.010789474, 0.810789474, 0.980789474, 0.160789474, 0.8…	0.205895	0.0686002	0.263, 0.191, 0.259, 0.17, 0.493, 0.209, 0.247, 0.18, 0.216, 0.207, 0.166, 0.192, 0.291, 0.18, 0.218, 0.168, 0.267, 0.177, 0.09, 0.21, 0.17, 0.22, 0.17, 0.15, 0.29, 0.21, 0.17, 0.13, 0.07, 0.2, 0.17, 0.24, 0.19, 0.25, 0.21, 0.14, 0.27, 0.18,	1.31859	1.19482	-0.1179, 0.3751, 0.4971, 0.3781, 3.9711, 0.5981, 0.8761, 1.7471, 0.2721, 0.8251, 1.5151, 3.0041, 1.1701, 1.4521, 0.9401, 0.8561, 1.1351, 3.1881, 2.038684211, 0.168684211, 1.528684211, -0.721315789, 4.068684211, 1.588684211, 0.878684211, 1.248684211, 1.608684211, 3.028684211, 0.408684211, 0.628684211, 3.068684211, 3.008684211, -1.231315789, 1.468684211, 1.078684211, 1.868684211, 0.218684211, 1.468…
AT1G32430			F-box and associated interaction domains-containing protein;(source:Araport11)	501722650	17665211	-0.2995	0.53033	0.0755, -0.6745,	0.2265	0.0954594	0.294, 0.159,	-0.062625	1.33502	-1.006625, 0.881375,
AT1G47056	VIER F-BOX PROTEINE 1 VFB1	VIER F-BOX PROTEINE 1 VFB1	Encodes an F-box protein. Based on genetic analysis appears to be functionally redundant with VFB2,3, and 4. When expression of all 4 genes is reduced plants show defects in growth and reduced expression of auxin response genes.	501681836,501681836,501710157,501710157,501712682,501721388,501721388,501724643	12169662,12169662,12912986,12912986,15181213,17435085,17435085,18375657	0.01637	0.539681	0.508421053, 0.398421053, 0.418421053, -0.011578947, 0.198421053, -0.151578947, 0.168421053, 0.188421053, 0.308421053, 1.178421053, 0.218421053, 0.328421053, -0.041578947, 0.308421053, 0.458421053, -0.491578947, -0.611578947, -0.521578947, -0.731578947, -0.441578947, -0.312631579, -0.602631579, -0.342631579, -0.342631579, -0.282631579, -0.782631579, -0.602631579, -0.122631579, -0.632631579, 0.907…	0.189538	0.0649108	0.168, 0.257, 0.358, 0.193, 0.221, 0.349, 0.234, 0.155, 0.149, 0.226, 0.117, 0.132, 0.114, 0.126, 0.116, 0.122, 0.126, 0.095, 0.185, 0.161, 0.189, 0.232, 0.269, 0.183, 0.305, 0.217, 0.229, 0.219, 0.097, 0.277, 0.183, 0.137, 0.153, 0.203, 0.174, 0.153, 0.237, 0.196, 0.135,	1.6904	1.22555	3.214473684, 2.756473684, 1.958473684, 1.865473684, 2.043473684, 1.163473684, 1.580473684, 2.521473684, 4.042473684, 3.036473684, 2.587473684, 1.251473684, 3.275473684, 2.548473684, 3.129473684, 2.664473684, 2.044473684, 2.956473684, 2.113473684, 1.890473684, 0.190578947, -0.717421053, 0.496578947, -1.231421053, 0.553578947, 0.502578947, 0.528578947, 0.710578947, 1.622578947, 3.658578947, 0.96357…
AT1G47270	TUBBY LIKE PROTEIN 6 TLP6	TUBBY LIKE PROTEIN 6 TLP6;TUBBY LIKE PROTEIN 6 AtTLP6	Member of TLP family	1345963,1345963,501712329,501719114,501728802,501745730,501760944,501737215,501737216	11118137,11118137,15064372,16684236,18775970,22101548,25168737,,	0.1253	0.936275	-0.24925, 0.04075, 0.02075, 0.24075, 0.35075, -0.12925, 1.99075, -0.03925, 0.09075, 0.05075, 0.46075, -0.07925, 0.50075, 0.29075, 0.30075, 0.15075, -0.18925, 0.12075, 0.78075, -0.07925, 0.46075, 0.60075, 0.95075, 0.35075, 0.16075, 1.76075, 0.97075, 0.15075, 0.48075, 1.35075, 0.67075, 0.09075, 0.19075, 0.80075, 0.65075, 0.51075, 0.68075, 0.38075, 6.44075, 1.00075, 0.404102564, 0.264102564, -0.1258…	0.17155	0.0667083	0.151, 0.133, 0.169, 0.114, 0.078, 0.128, 0.193, 0.115, 0.063, 0.176, 0.121, 0.133, 0.19, 0.107, 0.118, 0.149, 0.135, 0.097, 0.1, 0.176, 0.076, 0.334, 0.199, 0.209, 0.371, 0.333, 0.236, 0.216, 0.185, 0.192, 0.196, 0.252, 0.155, 0.218, 0.228, 0.147, 0.244, 0.29, 0.443, 0.204, 0.195, 0.188, 0.153, 0.155, 0.132, 0.137, 0.059, 0.162, 0.227, 0.18, 0.088, 0.131, 0.13, 0.15, 0.157, 0.179, 0.101, 0.218, …	1.27172	0.891329	1.674775, 2.300775, 1.663775, 2.093775, 2.647775, 1.554775, 1.556775, 2.085775, 1.803775, 1.155775, 0.867775, 0.780775, 0.586775, 2.092775, 0.045775, 0.523775, 1.744775, 1.150775, 0.782775, 1.772775, 1.196775, 0.212775, 2.076775, 0.937775, 0.307775, 1.351775, 1.218775, 2.183775, -0.862225, 3.051775, 0.760775, -0.238225, 0.640775, 0.196775, 0.780775, -0.568225, 0.884775, 0.628775, 3.154775, 1.5177…
AT1G47730			F-box and associated interaction domains-containing protein;(source:Araport11)	501711234,501712377,501720518	14576160,15047898,17189341	-0.21475	0.493204	0.7295, -0.1005, -0.1105, 0.0495, 0.1895, 0.9295, -0.2505, -0.5705, -0.3205, 0.2295, -0.5605, -1.1505, -0.6705, -0.4105, -0.8405, -0.1005, -0.7305, -0.4205, -0.6405, -0.5405, 1.016, 0.446, 0.426, 0.156, -0.474, -0.854, -0.384, -0.034, 0.256, 1.326, 0.236, -0.174, 0.366, -0.664, -0.014, -0.264, -0.704, -0.694, -0.674, -0.534, -0.38075, -0.32075, -0.47075, 0.17925, -0.53075, -0.82075, -0.72075, -0.…	0.161217	0.0787728	0.198, 0.237, 0.151, 0.22, 0.177, 0.171, 0.162, 0.137, 0.11, 0.129, 0.147, 0.15, 0.129, 0.1, 0.185, 0.156, 0.158, 0.163, 0.203, 0.111, 0.565, 0.207, 0.216, 0.129, 0.113, 0.131, 0.272, 0.114, 0.28, 0.324, 0.11, 0.249, 0.203, 0.264, 0.199, 0.208, 0.212, 0.209, 0.232, 0.151, 0.127, 0.057, 0.137, 0.089, 0.107, 0.098, 0.105, 0.067, 0.113, 0.125, 0.084, 0.115, 0.156, 0.078, 0.082, 0.087, 0.126, 0.144, …	1.23695	1.64078	1.5966, 0.8196, 2.5756, 1.1376, 2.6516, 2.2646, 2.4556, 1.1876, 3.8386, 3.3136, 2.1786, 3.4636, 2.0166, 1.8816, 1.2656, 0.7896, 3.2666, 1.8316, 1.4556, 1.2506, 2.9985, -1.0055, -0.8015, -0.3825, -0.4685, -1.4785, -2.1355, -1.2325, -0.9025, 0.3295, 0.9125, -0.7495, 0.2165, -2.2825, -1.1775, -0.5785, -0.8705, -1.2275, -1.1525, -0.4685, 0.719, 1.748, 0.708, 1.995, 3.147, 1.621, 2.511, 3.012, 2.301, …
AT1G47790			F-box and associated interaction domains-containing protein;(source:Araport11)			-0.04375	0.37285	0.06825, -0.36175, -0.02175, -0.21175, -0.02175, -0.22175, -0.31175, -0.59175, -0.86175, -0.22175, 0.43825, 0.38825, 0.82825, -0.04175, -0.23175, 0.15825, 0.12825, 0.08825, 0.24825, -0.12175,	0.15395	0.037306	0.121, 0.174, 0.22, 0.181, 0.128, 0.082, 0.101, 0.16, 0.181, 0.119, 0.097, 0.173, 0.196, 0.201, 0.155, 0.144, 0.138, 0.184, 0.173, 0.151,	1.56102	0.798343	2.093075, 0.757075, 0.199075, 1.358075, 1.293075, 1.829075, 0.339075, 0.819075, 0.965075, 1.587075, 1.734075, 2.274075, 2.590075, 2.482075, 2.376075, 1.661075, 0.362075, 1.782075, 3.015075, 1.704075,
AT1G47810			F-box and associated interaction domains-containing protein;(source:Araport11)	501727972	0	0.028633	0.710318	0.8655, -0.509210526, -0.609210526, -0.349210526, 0.050789474, 1.500789474, -0.609210526, -0.389210526, -0.619210526, -0.159210526, 0.690789474, 0.230789474, -0.399210526, -0.199210526, -0.009210526, 2.070789474, -0.339210526, -0.269210526, -0.139210526, 0.190789474, -0.399210526,	0.26	0.0929516	0.17, 0.23, 0.43, 0.42, 0.2, 0.28, 0.4, 0.24, 0.34, 0.34, 0.2, 0.11, 0.29, 0.14, 0.18, 0.21, 0.35, 0.21, 0.22, 0.18, 0.32,	0.564669	1.51471	-1.295625, -0.411315789, -0.951315789, -0.111315789, 1.458684211, 4.608684211, -1.081315789, -1.131315789, 0.908684211, 0.748684211, 0.828684211, 0.588684211, 0.138684211, 3.098684211, 0.368684211, 2.268684211, 0.008684211, 1.818684211, 1.078684211, 0.358684211, -1.441315789,
AT1G49780	PLANT U-BOX 26 PUB26	PLANT U-BOX 26 PUB26	PUB25 and PUB26 are closely related paralogs that encode functional E3 ligases. They function in immune response pathway by targeting BIK1 for degradation.	501727236,501778533,501737483	18664614,29358080,	-0.02075	0.348665	-0.0545, -0.1545, 0.6355, -0.3845, -0.1445, -0.1845, -0.3945, 0.1155, -0.2545, -0.3945, 0.6155, -0.3645, 0.2455, -0.1545, 0.7455, 0.2555, -0.2445, -0.1445, -0.1745, -0.8745, 0.2555, 0.0255, -0.1745, -0.0845, -0.3345, 0.2955, -0.0045, 0.3355, 0.0955, 0.0355, -0.1445, -0.2345, -0.2645, -0.2645, -0.1345, 0.4755, 0.2055, 0.7955, -0.2345, -0.1645,	0.143775	0.0395588	0.199, 0.23, 0.227, 0.156, 0.182, 0.182, 0.165, 0.174, 0.215, 0.154, 0.125, 0.197, 0.179, 0.137, 0.14, 0.167, 0.091, 0.124, 0.134, 0.174, 0.109, 0.124, 0.142, 0.119, 0.126, 0.147, 0.128, 0.132, 0.174, 0.159, 0.069, 0.099, 0.122, 0.087, 0.1, 0.083, 0.091, 0.139, 0.113, 0.136,	0.951025	1.03172	0.0094, -0.2816, 0.3534, 1.3324, -0.0156, 1.3104, -0.1046, -0.3776, 0.1824, 1.2844, 1.5474, -0.7816, 0.9114, 0.0834, -0.2506, -0.2236, 2.6624, 2.0994, -0.8666, -0.8836, 1.9854, 1.6314, 1.9334, 2.5394, 0.8304, 2.3924, 1.5354, 2.4394, 1.5874, 0.7684, 1.2724, 0.7384, 1.6324, 1.5634, 1.9794, 2.7614, 0.2444, 0.7924, 0.8474, 0.5754,
AT1G50870			F-box and associated interaction domains-containing protein;(source:Araport11)			0.567759	0.782762	0.958, 0.008, -0.062, 0.818, 3.148, 3.248, 2.618, 2.258, 2.908, 0.758, 0.728, 0.348, 0.498, 0.558, 0.208, 0.208, 0.068, 0.758, 0.168, 0.368, 0.843888889, 0.443888889, 0.013888889, 0.173888889, 0.283888889, 0.483888889, 0.373888889, 0.603888889, 0.223888889, 0.763888889, 0.183888889, 0.463888889, 0.273888889, 1.343888889, 0.403888889, 0.833888889, 0.313888889, 0.483888889, 0.363888889, 0.333888889…	0.249433	0.0923878	0.373, 0.332, 0.421, 0.235, 0.32, 0.417, 0.194, 0.215, 0.41, 0.241, 0.17, 0.143, 0.044, 0.135, 0.178, 0.168, 0.19, 0.17, 0.137, 0.088, 0.224, 0.128, 0.15, 0.228, 0.275, 0.189, 0.294, 0.257, 0.235, 0.229, 0.322, 0.34, 0.264, 0.265, 0.227, 0.253, 0.233, 0.305, 0.258, 0.145, 0.285, 0.601, 0.331, 0.207, 0.387, 0.225, 0.297, 0.381, 0.177, 0.284, 0.249, 0.27, 0.234, 0.29, 0.25, 0.188, 0.264, 0.162, 0.2…	0.92773	1.28259	0.1651, 0.0411, -2.3639, 0.4441, 3.6931, 2.9851, 2.1361, 0.0931, 2.0441, 1.6151, 1.6321, 0.6151, 0.3741, 0.8481, 0.4501, 0.2511, -1.0709, 1.0581, 0.1251, -0.0779, 2.655444444, 1.702444444, 0.974444444, 1.231444444, 1.711444444, 1.225444444, 1.416444444, 2.116444444, 0.499444444, 0.906444444, 0.778444444, 2.431444444, 2.320444444, 0.438444444, 2.293444444, 4.218444444, 3.273444444, 0.029444444, 1.…
AT1G51320			F-box and associated interaction domains-containing protein;(source:Araport11)	501683127,501683127,5891,5891,501724486	11019805,11019805,11077244,11077244,18431481	-0.293778	0.387752	-0.0185, 0.0615, -0.1485, -0.2385, 0.1615, -0.7485, -0.6885, -0.2785, -0.6385, -0.3285, -0.5385, -0.5985, 0.0115, 0.4415, -0.6485, -0.2685, 0.0615, 0.3415, -0.6985, 0.1315, -1.1185, 0.0015, -0.3585, 0.1015, -0.6685, -0.8685, 0.2315, -0.5585, -0.2485, -0.4785, -0.2285, -1.0985, 0.0115, -0.1785, -0.3285, -0.1585,	0.169222	0.055217	0.198, 0.156, 0.17, 0.179, 0.196, 0.292, 0.088, 0.163, 0.128, 0.099, 0.178, 0.119, 0.16, 0.181, 0.149, 0.147, 0.133, 0.122, 0.125, 0.213, 0.169, 0.117, 0.174, 0.197, 0.248, 0.201, 0.192, 0.244, 0.086, 0.209, 0.134, 0.334, 0.215, 0.17, 0.123, 0.083,	0.936389	0.989049	1.89525, 1.87225, 1.18625, 1.87825, 2.43525, 0.28425, 2.30325, 0.89325, 0.96125, 2.17025, 0.99325, 1.26125, 1.40225, 1.41925, 0.38425, 0.36125, 1.42825, 2.12625, 0.94525, 1.27525, 0.96925, 1.05625, 0.76725, 0.33125, -0.75475, 1.02825, 2.71625, -0.89175, 0.88825, -0.57975, -0.10975, -1.92575, 0.06225, 1.32525, 0.80525, 0.54625,
AT1G51370			F-box/RNI-like/FBD-like domains-containing protein;(source:Araport11)			-0.125526	0.510756	0.893846154, -0.746153846, -0.736153846, 0.313846154, -0.146153846, -0.206153846, 0.043846154, 0.783846154, 0.513846154, -0.316153846, -0.386153846, -0.266153846, -0.326153846, -0.636153846, -0.596153846, -0.196153846,	0.13975	0.0352505	0.126, 0.222, 0.165, 0.128, 0.117, 0.166, 0.128, 0.122, 0.199, 0.149, 0.099, 0.121, 0.11, 0.142, 0.153, 0.089,	1.7161	0.872996	3.118846154, 0.757846154, 0.017846154, 2.672846154, 1.783846154, 1.830846154, 2.910846154, 2.647846154, 2.268846154, 1.109846154, 1.010846154, 1.998846154, 1.280846154, 1.114846154, 0.962846154, 1.969846154,
AT1G51550			Kelch repeat-containing F-box family protein;(source:Araport11)	501683127,501683127,501711234	11019805,11019805,14576160	-0.0827404	0.548785	0.0195, 0.6795, 0.3695, -0.0305, 0.1895, 0.3595, -0.2305, 0.9195, -0.1505, 0.3895, -0.4205, 0.2395, -0.7805, -0.7105, -0.7605, -0.1305, -0.8605, -0.6805, -0.7905, 1.3495, -0.3905, 0.2495, -0.2705, 0.3695, -0.5205, -0.0205, -0.0605, -0.2605, 0.8595, -0.7405, -0.8205, -0.3605, -0.4005, -0.6505, -1.1005, -0.6505, -0.0205, -0.6405, -0.4205, 0.126, 0.356, 0.316, 0.596, -0.054, 0.216, -0.384, -0.424, 1…	0.168782	0.0649838	0.238, 0.235, 0.189, 0.159, 0.28, 0.207, 0.183, 0.281, 0.252, 0.252, 0.151, 0.295, 0.175, 0.164, 0.456, 0.194, 0.25, 0.12, 0.124, 0.163, 0.163, 0.288, 0.126, 0.228, 0.149, 0.12, 0.142, 0.117, 0.094, 0.124, 0.213, 0.12, 0.136, 0.165, 0.111, 0.156, 0.14, 0.122, 0.124, 0.13, 0.156, 0.204, 0.134, 0.155, 0.122, 0.121, 0.154, 0.355, 0.146, 0.174, 0.192, 0.262, 0.133, 0.115, 0.143, 0.136, 0.104, 0.124, …	1.54694	1.5555	-0.0714, 0.9496, 1.1236, 1.9946, 0.7566, 2.6016, 1.8136, 1.8946, 0.4356, 0.3486, 1.3276, -0.5594, 0.4496, 0.2476, -2.0904, 1.0306, -0.1934, 1.1176, 1.6216, 2.3826, 2.8036, 3.0386, 1.6816, 2.9216, 1.1776, 3.1356, 1.9136, 3.5326, 3.7096, 3.9136, 0.1476, 2.3346, 1.9956, 1.9606, 1.5096, 3.4106, 3.8306, 1.7586, 2.2826, 0.5995, 0.2455, -1.4875, 0.6895, 0.0895, 0.1725, -0.8285, -1.0385, 0.1175, 0.7535, …
AT1G53320	TUBBY LIKE PROTEIN 7 TLP7	TUBBY LIKE PROTEIN 7 AtTLP7;TUBBY LIKE PROTEIN 7 TLP7	Member of TLP family	1345963,1345963,501712329,501720151,501721468,501728802,501745632,501745730,501750528,501760944	11118137,11118137,15064372,17028967,17409064,18775970,22037706,22101548,22751378,25168737	0.368	0.446335	0.7775, 0.2175, 0.2975, 2.1575, 0.0675, 0.0175, -0.3025, 0.1675, 0.0775, 1.0575, 0.4175, 1.2975, 0.2275, 0.5275, 0.5375, 0.1075, 0.1675, -0.0225, 0.0975, 0.7775, 0.3075, 0.3575, 0.0575, 0.0675, 0.3675, 0.2675, 0.0675, 0.1475, 0.1875, 0.2375, 0.6275, 0.9075, 0.5475, 0.2275, 0.4275, 0.2575, 0.7375, 0.1775, -0.4425, 0.5175,	0.158375	0.047661	0.124, 0.124, 0.116, 0.285, 0.137, 0.129, 0.116, 0.122, 0.106, 0.177, 0.232, 0.194, 0.172, 0.166, 0.157, 0.186, 0.142, 0.151, 0.141, 0.21, 0.1, 0.099, 0.181, 0.184, 0.126, 0.096, 0.17, 0.281, 0.149, 0.14, 0.145, 0.113, 0.199, 0.138, 0.106, 0.198, 0.235, 0.109, 0.155, 0.224,	0.978675	1.1361	2.25905, 2.70205, 0.00105, 1.47505, 1.81005, 2.17405, 1.63905, 0.79705, 1.29605, 2.36305, 1.16705, 0.14105, 2.86305, 1.31105, 2.46605, 1.33405, 1.82105, 0.71805, 0.38405, -0.17995, 1.19105, 1.58605, 1.24005, 0.18505, 1.41505, 1.31205, 0.79405, -1.13695, 1.30405, 1.10805, 0.38705, 1.55105, 0.00105, 0.31005, 0.39105, -1.27695, -1.76195, 0.87105, -1.58795, 2.72205,
AT1G53790			F-box and associated interaction domains-containing protein;(source:Araport11)			0.075	0.441963	0.1955, 1.6755, -0.2445, 0.3055, 0.1455, 0.0955, 0.2655, 0.3255, 0.0755, 0.1155, 0.0055, 0.0555, 0.0355, -0.3145, -0.4545, 0.0155, -0.2045, -0.4545, 0.0555, -0.1945,	0.1634	0.0679593	0.244, 0.325, 0.088, 0.171, 0.094, 0.135, 0.18, 0.306, 0.2, 0.08, 0.104, 0.154, 0.192, 0.192, 0.127, 0.176, 0.116, 0.094, 0.131, 0.159,	1.13303	0.679655	0.559375, 0.709375, 1.722375, 2.098375, 1.476375, 2.234375, 0.645375, 0.387375, 1.349375, 2.124375, 0.681375, 0.764375, 1.371375, 0.415375, 0.380375, 1.298375, 0.663375, 0.189375, 2.208375, 1.381375,
AT1G54550			F-box and associated interaction domains-containing protein;(source:Araport11)			-0.22225	0.341429	-0.08175, -0.40175, -0.57175, -0.46175, -0.53175, -0.24175, -0.66175, 0.25825, -0.32175, 0.01825, 0.73825, -0.32175, -0.28175, 0.00825, 0.12825, -0.26175, -0.43175, -0.14175, -0.18175, -0.70175,	0.15285	0.0412697	0.127, 0.206, 0.112, 0.114, 0.104, 0.141, 0.214, 0.093, 0.107, 0.191, 0.164, 0.131, 0.214, 0.11, 0.164, 0.182, 0.168, 0.142, 0.151, 0.222,	1.28443	0.942259	1.683075, 0.275075, 1.740075, 1.748075, 1.227075, 0.752075, -0.160925, 2.852075, 2.198075, 0.752075, 0.552075, 0.410075, 1.667075, 2.232075, 0.827075, 1.079075, 2.777075, 1.940075, 1.801075, -0.663925,
AT1G55000			peptidoglycan-binding LysM domain-containing protein;(source:Araport11)	501728802,501763406,501776308	18775970,25798143,28724081	0.501418	1.08627	1.789166667, -1.890833333, 0.759166667, 0.419166667, 1.449166667, 1.099166667, 0.039166667, 0.459166667, -0.710833333, 1.289166667, -0.550833333, -1.460833333, -0.620833333, -1.350833333, -0.870833333, 0.889166667, 1.179166667, -0.990833333, 0.329166667, -0.780833333, 1.679166667, 1.019166667, 1.209166667, 1.419166667, 1.779166667, 1.209166667, 1.979166667, 0.459166667, 1.789166667, 1.089166667, …	0.324075	0.0680258	0.381, 0.228, 0.295, 0.301, 0.322, 0.322, 0.298, 0.334, 0.322, 0.328, 0.203, 0.367, 0.31, 0.194, 0.319, 0.281, 0.258, 0.281, 0.229, 0.348, 0.31, 0.328, 0.329, 0.293, 0.338, 0.384, 0.294, 0.286, 0.475, 0.293, 0.346, 0.354, 0.323, 0.472, 0.296, 0.315, 0.555, 0.351, 0.394, 0.306,	2.32709	1.11217	2.274016667, 1.698016667, 2.077016667, 0.831016667, 2.049016667, 3.237016667, 0.834016667, 1.143016667, 2.557016667, 2.440016667, 1.620016667, 0.596016667, 1.642016667, 2.118016667, 1.645016667, 2.646016667, 2.966016667, 1.381016667, -0.036983333, 1.521016667, 2.261016667, 1.680016667, 2.559016667, 2.549016667, 2.919016667, 2.440016667, 4.640016667, 2.982016667, 3.149016667, 2.991016667, 3.927016…
AT1G55030			RNI-like superfamily protein;(source:Araport11)	501718869	16626458	-0.0814973	0.442244	0.011578947, -0.238421053, 0.101578947, 0.131578947, -0.118421053, 0.271578947, 0.121578947, -0.118421053, 0.431578947, 0.011578947, -0.558421053, 0.421578947, -1.038421053, -0.038421053, -0.148421053, -0.128421053, 0.421578947, 0.771578947, 0.921578947, -1.138421053, 0.571578947, -0.208421053, -0.118421053, -0.528421053, -0.778421053, -0.518421053, -0.628421053, -0.228421053, 0.321578947, -0.118…	0.289231	0.111958	0.189, 0.273, 0.266, 0.442, 0.304, 0.361, 0.28, 0.457, 0.523, 0.249, 0.451, 0.35, 0.203, 0.149, 0.261, 0.146, 0.296, 0.155, 0.352, 0.238, 0.309, 0.308, 0.553, 0.283, 0.286, 0.378, 0.378, 0.242, 0.128, 0.427, 0.389, 0.175, 0.218, 0.133, 0.25, 0.251, 0.373, 0.106, 0.148,	1.5242	1.10254	2.130973684, 1.776973684, 1.708973684, 1.480973684, 2.418973684, 2.198973684, 3.482973684, -0.434026316, 2.612973684, 1.905973684, 1.359973684, 0.870973684, 0.629973684, 2.041973684, 2.947973684, 1.555973684, 2.103973684, 4.229973684, 2.593973684, -1.118026316, 2.349973684, 0.853973684, -0.080026316, 0.790973684, 0.768973684, 0.409973684, 0.660973684, 1.011973684, 2.438973684, 2.548973684, -0.497…
AT1G55270			Galactose oxidase/kelch repeat superfamily protein;(source:Araport11)	501723886	18218973	0.24204	0.520272	0.8605, 0.3805, 0.6805, 0.6405, 0.8905, 1.1205, 0.3305, 0.4005, 0.3605, 0.2905, 1.2205, 0.0005, 0.3105, 0.5705, 0.2705, 0.1105, 0.3905, 0.8905, 0.7405, 1.2005, 0.421578947, -0.138421053, -0.118421053, -0.398421053, -0.118421053, -1.428421053, 0.011578947, -0.118421053, 0.061578947, 0.021578947, 0.121578947, -0.158421053, -0.258421053, 0.221578947, -0.028421053, -0.418421053, 0.041578947, -0.15842…	0.25665	0.0903933	0.328, 0.214, 0.144, 0.253, 0.104, 0.168, 0.27, 0.17, 0.162, 0.257, 0.208, 0.159, 0.165, 0.194, 0.233, 0.209, 0.514, 0.275, 0.163, 0.196, 0.375, 0.301, 0.395, 0.331, 0.323, 0.355, 0.161, 0.46, 0.153, 0.288, 0.373, 0.163, 0.298, 0.29, 0.292, 0.25, 0.267, 0.296, 0.263, 0.246,	0.706062	1.47325	1.8815, -0.3705, 1.7465, -1.5095, 1.9445, 0.7375, -0.8065, 1.0665, 1.8235, -0.2905, 1.0855, 1.3725, 1.4365, 1.7385, 0.8325, 0.6075, 0.1225, 1.6895, 2.6945, -0.5365, 4.263973684, -0.663026316, 1.842973684, -0.142026316, -0.839026316, -2.714026316, 0.837973684, -0.986026316, 2.391973684, 0.499973684, 2.135973684, 1.457973684, -0.850026316, 1.231973684, 1.960973684, 1.661973684, 1.411973684, 1.47197…
AT1G59680	EMBRYO SAC DEVELOPMENT ARREST 1 EDA1	EMBRYO SAC DEVELOPMENT ARREST 1 EDA1	F-box associated ubiquitination effector family protein;(source:Araport11)	501714637	15634699	-0.1285	0.410183	-1.3185, -0.6885, -0.1285, 0.0815, 0.1015, 0.2015, -0.3085, -0.0285, 0.1315, -0.4485, 0.2615, -0.1485, -0.2385, 0.0215, 0.3915, 0.1515, -0.2185,	0.155471	0.0347043	0.213, 0.165, 0.14, 0.174, 0.152, 0.127, 0.146, 0.153, 0.199, 0.187, 0.176, 0.201, 0.139, 0.097, 0.113, 0.164, 0.097,	1.77349	0.832913	0.65825, 0.49925, 1.89425, 1.96125, 2.71825, 2.86325, 1.09825, 2.61225, 2.18225, 1.73825, 0.31425, 1.54625, 1.09025, 2.62225, 1.96225, 2.90725, 1.48125,
AT1G60400			F-box/RNI-like superfamily protein;(source:Araport11)	501711234,501727972	14576160,	0.19925	0.387203	-0.05075, -0.06075, 0.22925, -0.21075, -0.41075, -0.02075, 0.28925, 0.52925, 0.47925, 0.39925, 0.15925, 0.74925, 0.17925, 0.20925, 0.00925, 0.77925, -0.20075, -0.29075, 0.11925, 1.09925,	0.1488	0.0363022	0.103, 0.124, 0.195, 0.13, 0.154, 0.177, 0.136, 0.136, 0.133, 0.067, 0.112, 0.153, 0.15, 0.153, 0.184, 0.185, 0.16, 0.236, 0.14, 0.148,	2.63475	1.33369	3.852, 4.559, 3.163, 3.59, 2.452, 1.625, 1.756, 3.269, 1.395, 4.607, 2.885, 3.983, 1.834, 2.32, 1.592, 0.308, -0.383, 3.681, 3.143, 3.064,
AT1G60570			Galactose oxidase/kelch repeat superfamily protein;(source:Araport11)	501718506,501722719,501739720	16489130,17640338,20736450	-0.0353823	0.349075	-0.006153846, 0.063846154, 0.263846154, 0.353846154, 0.343846154, 0.043846154, -0.506153846, -0.016153846, 0.613846154, -0.336153846, -0.116153846, 0.403846154, -0.056153846, -0.436153846, -0.106153846, -0.066153846, -0.286153846, -0.426153846, 0.163846154, 0.773846154, 0.163846154, -0.556153846, -0.226153846, -0.026153846, 0.283846154, -0.676153846, 0.183846154, -0.196153846, 0.553846154, 0.1638…	0.145359	0.0416764	0.148, 0.11, 0.098, 0.156, 0.106, 0.121, 0.09, 0.186, 0.127, 0.226, 0.15, 0.136, 0.144, 0.136, 0.123, 0.126, 0.164, 0.117, 0.141, 0.244, 0.178, 0.165, 0.109, 0.118, 0.152, 0.134, 0.242, 0.15, 0.186, 0.13, 0.124, 0.122, 0.081, 0.1, 0.145, 0.15, 0.097, 0.246, 0.191,	1.37197	0.970259	1.387846154, 1.013846154, 2.217846154, 0.347846154, 2.455846154, 2.603846154, 0.060846154, 1.179846154, 1.850846154, 0.495846154, 2.314846154, 2.911846154, 1.066846154, 1.021846154, 1.768846154, -0.030153846, 0.497846154, 2.058846154, 2.635846154, 4.274846154, 1.033846154, 0.722846154, 0.789846154, 1.212846154, 1.747846154, 0.491846154, 0.669846154, 1.437846154, 1.892846154, 1.226846154, -0.87915…
AT1G61330			FBD, F-box and Leucine Rich Repeat domains containing protein;(source:Araport11)			0.446246	0.655311	1.381578947, 2.181578947, 0.201578947, 1.311578947, -0.278421053, 0.781578947, 1.211578947, 0.531578947, 0.271578947, -0.118421053, 1.211578947, 0.771578947, 0.581578947, 1.591578947, -0.328421053, 0.361578947, 0.601578947, -0.028421053, 1.151578947, 0.221578947, -0.378421053, -0.258421053, 0.011578947, -0.118421053, 0.331578947, -0.088421053, 0.011578947, 0.041578947, 0.421578947, -0.198421053,	0.252167	0.078308	0.198, 0.167, 0.306, 0.135, 0.29, 0.28, 0.171, 0.266, 0.214, 0.399, 0.142, 0.152, 0.244, 0.122, 0.211, 0.301, 0.196, 0.234, 0.326, 0.302, 0.361, 0.378, 0.306, 0.22, 0.144, 0.334, 0.293, 0.319, 0.336, 0.218,	1.88054	1.70617	1.698973684, 1.984973684, -0.405026316, 1.647973684, -0.674026316, 2.826973684, 4.422973684, 1.181973684, 1.731973684, 2.992973684, 3.804973684, 1.795973684, 0.755973684, 3.327973684, -2.477026316, 1.566973684, 2.303973684, 2.900973684, 1.755973684, 0.236973684, 2.117973684, 3.561973684, 0.716973684, 4.547973684, 3.999973684, -0.078026316, 1.044973684, 0.225973684, 5.081973684, 1.813973684,
AT1G63090	PHLOEM PROTEIN 2-A11 PP2-A11	PHLOEM PROTEIN 2-A11 AtPP2-A11;PHLOEM PROTEIN 2-A11 PP2-A11	phloem protein 2-A11;(source:Araport11)	501682998,501707007,501710157,501710157,501713112,501714581,501716464,501719867,501721538,501727266,501728802,501776308	12529520,12795696,12912986,12912986,15287975,15688252,15960624,16998091,17521445,18650403,18775970,28724081	0.377042	0.885137	0.75575, 0.68575, 0.32575, 0.63575, 0.49575, 0.60575, 0.64575, 0.48575, 0.63575, 1.14575, 0.17575, 0.13575, -0.30425, 0.13575, 0.13575, 1.09575, -0.32425, 0.01575, -0.22425, 0.80575, 0.37575, 0.01575, 0.61575, 1.12575, 0.44575, 0.51575, 0.60575, 0.07575, 0.60575, 0.39575, 0.50575, -0.93425, 0.10575, -0.16425, -0.28425, 0.42575, -0.40425, -0.25425, 0.31575, 0.11575, 1.879166667, 0.319166667, 0.569…	0.1995	0.0982193	0.104, 0.08, 0.087, 0.123, 0.124, 0.096, 0.059, 0.141, 0.133, 0.139, 0.074, 0.117, 0.121, 0.14, 0.219, 0.135, 0.131, 0.091, 0.079, 0.111, 0.173, 0.13, 0.133, 0.073, 0.122, 0.162, 0.185, 0.133, 0.133, 0.181, 0.22, 0.143, 0.14, 0.123, 0.12, 0.082, 0.13, 0.117, 0.156, 0.141, 0.277, 0.198, 0.311, 0.35, 0.285, 0.34, 0.313, 0.494, 0.255, 0.354, 0.372, 0.408, 0.388, 0.304, 0.37, 0.32, 0.402, 0.243, 0.33…	1.51268	1.46036	2.9636, 2.5156, 1.8066, 0.8626, 0.5246, 2.7526, 2.5526, 2.2166, 1.9216, 1.2276, 1.4096, 1.4536, 0.5326, 1.0216, 1.6526, 0.5806, 1.1116, 2.1256, 0.6726, 2.5036, -0.2184, 1.2976, 1.6766, 2.1116, 0.6526, 1.0936, 1.1106, 2.7176, 1.6546, 0.4716, -0.0044, 0.9316, 0.4496, 0.9666, 1.4486, 0.7846, 0.3776, 1.9316, 1.6296, 1.3906, 3.232016667, 2.852016667, 3.578016667, 2.886016667, 2.841016667, 3.857016667,…
AT1G65740	UPWARD CURLY LEAF1 UCL1	UPWARD CURLY LEAF1 UCL1	ascorbic acid mannose pathway regulator (DUF295);(source:Araport11)	501718932,501742377,501763093,501727942	16608451,21518870,25689861,	0.955	0.860647	0.868, -0.582, 2.618, 0.808, 1.088, 0.368, 0.218, 0.708, 2.858, 1.248, 1.768, 1.008, 0.588, 0.508, 0.318, 0.308, 0.938, 1.378, 0.478, 0.528, 1.008, 1.568, 0.648, 0.168, 0.888, 2.548, 2.848, 1.078, 0.898, 3.368, 1.388, 0.438, 0.958, 0.588, 0.648, 0.308, 0.008, 0.208, -0.002, 0.618,	0.230425	0.0943773	0.211, 0.378, 0.287, 0.291, 0.268, 0.235, 0.12, 0.35, 0.383, 0.211, 0.196, 0.117, 0.203, 0.078, 0.111, 0.272, 0.136, 0.277, 0.123, 0.157, 0.312, 0.271, 0.327, 0.322, 0.324, 0.243, 0.367, 0.291, 0.338, 0.385, 0.087, 0.133, 0.152, 0.124, 0.318, 0.122, 0.145, 0.115, 0.264, 0.173,	0.795425	1.04162	2.6111, -2.0019, 0.5421, 1.9631, 1.4891, 1.7681, 2.0201, -0.1069, 1.3731, 1.3081, 2.2451, 1.3061, 0.2141, 1.5761, 2.2651, -0.0719, 1.1921, -0.1549, 0.4681, 0.6011, 1.1151, 2.2251, -0.1769, -0.1259, 0.3471, 1.9611, 0.7661, 0.0341, 0.1731, 2.4881, 1.4811, 0.4441, -0.6679, 0.5711, -0.7349, 1.1491, -0.2249, -0.0489, -0.4869, 0.9211,
AT1G66160	CYS, MET, PRO, AND GLY PROTEIN 1 CMPG1	ATCMPG1;"CYS, MET, PRO, AND GLY PROTEIN 1" CMPG1, PUB20	CYS, MET, PRO, and GLY protein 1;(source:Araport11)	501681503,501710652,501712682,501718042,501719431,501721149,501722879,501722879,501722879,501727236,501728802	12084942,12946625,15181213,16299171,16766693,17337630,17722694,17722694,17722694,18664614,18775970	0.01875	0.462679	0.966, 0.626, -0.224, -0.404, 0.286, 0.006, 0.326, 0.156, 0.246, 0.436, 1.076, -0.284, -0.274, -0.154, 0.016, -0.144, 0.096, 0.066, 1.136, 0.166, 0.506, -0.064, -0.094, -0.634, 0.286, -0.184, -0.794, -0.414, 0.326, -0.114, -0.474, -0.494, -0.564, 0.376, -0.264, -0.074, 0.616, -0.444, -0.374, -0.494,	0.16475	0.0551449	0.17, 0.17, 0.31, 0.19, 0.12, 0.17, 0.14, 0.16, 0.23, 0.17, 0.21, 0.1, 0.14, 0.13, 0.08, 0.1, 0.1, 0.13, 0.14, 0.21, 0.24, 0.26, 0.09, 0.16, 0.14, 0.14, 0.22, 0.12, 0.23, 0.18, 0.12, 0.12, 0.21, 0.13, 0.17, 0.15, 0.11, 0.12, 0.22, 0.29,	0.492	0.71078	1.0535, 0.8435, 0.4835, 1.2035, 0.1435, 1.3635, 1.3335, 1.1735, 1.7635, 1.2635, 0.5235, -0.2265, 1.0835, -0.3865, 0.2635, -0.1265, 0.6635, 0.7735, 0.9835, 1.4935, 0.3435, -0.7165, 0.8735, -0.5665, 1.7935, -0.5865, 0.2035, 0.6435, 0.4135, 0.3935, -0.2665, -0.7865, -0.0965, 0.7935, 0.5135, 0.1335, 1.3235, 0.0235, -0.7865, 0.3635,
AT1G67190			F-box/RNI-like superfamily protein;(source:Araport11)			-0.0541518	0.27746	-0.246153846, -0.296153846, -0.096153846, 0.103846154, -0.096153846, -0.226153846, -0.066153846, 0.323846154, 0.223846154, -0.196153846, 0.003846154, 0.163846154, 0.013846154, -0.246153846, 0.243846154, 0.343846154, 0.343846154, -0.366153846, -0.326153846, -0.686153846,	0.1688	0.0596204	0.12, 0.114, 0.126, 0.193, 0.128, 0.141, 0.17, 0.334, 0.271, 0.195, 0.099, 0.206, 0.211, 0.161, 0.132, 0.166, 0.098, 0.189, 0.205, 0.117,	1.8862	0.776698	2.172846154, 2.724846154, 2.478846154, 2.013846154, 2.552846154, 1.853846154, 1.406846154, 0.139846154, 1.670846154, 2.614846154, 2.316846154, 1.434846154, 1.434846154, 1.325846154, 2.971846154, 2.697846154, 2.845846154, 1.013846154, 0.800846154, 1.251846154,
AT1G67530	PUB7	PUB7	ARM repeat superfamily protein;(source:Araport11)	501710652,501728802	12946625,18775970	-0.148	0.330809	0.166, -0.244, -0.804, -0.494, 0.456, 0.166, 0.246, 0.916, -0.524, -0.214, -0.034, -0.274, 0.156, -0.224, -0.194, -0.274, 0.096, -0.674, -0.084, -0.544, 0.076, -0.214, 0.086, 0.206, -0.304, 0.276, -0.304, -0.344, -0.454, -0.194, -0.054, -0.314, 0.026, -0.164, -0.594, 0.136, -1.024, -0.484, -0.004, -0.084, -0.194, -0.294, -0.204, -0.154, -0.084, -0.024, -0.254, -0.314, -0.194, 0.516, -0.184, 0.486…	0.15465	0.0538642	0.123, 0.15, 0.148, 0.131, 0.163, 0.186, 0.272, 0.223, 0.106, 0.137, 0.17, 0.14, 0.25, 0.2, 0.12, 0.15, 0.12, 0.13, 0.09, 0.29, 0.12, 0.31, 0.23, 0.29, 0.19, 0.12, 0.12, 0.19, 0.16, 0.11, 0.09, 0.12, 0.17, 0.11, 0.12, 0.21, 0.08, 0.13, 0.13, 0.09, 0.09, 0.15, 0.13, 0.17, 0.17, 0.22, 0.19, 0.11, 0.22, 0.17, 0.13, 0.12, 0.12, 0.16, 0.16, 0.12, 0.12, 0.15, 0.12, 0.07,	0.829333	0.728254	1.2235, 1.2335, -0.5365, 0.5735, 1.0935, 0.5235, 0.9435, 0.8535, 0.3035, 1.6035, 0.8335, 0.4335, 0.8635, 2.5535, 1.3035, 0.5635, 1.4835, 1.5535, 1.1835, 0.1435, -0.0165, 0.6435, 1.2635, -0.1265, -0.0765, 1.5535, 1.6235, 0.8035, 1.1535, 2.4235, 1.0335, 0.7535, 1.8235, 1.9435, 0.9635, 0.1135, 0.8835, 1.5535, 1.3235, 2.3735, 1.9435, 1.4035, 1.3035, -0.2565, -0.5665, 0.5435, 0.7935, 0.0635, 0.0435, 0…
AT1G74510			Galactose oxidase/kelch repeat superfamily protein;(source:Araport11)	501741056	21119043	0.052	0.606794	-1.1805, 0.0495, -0.6305, -0.5205, 0.6495, -0.8705, 0.0995, -0.5905, -0.4005, -0.0405, 0.7495, 1.0795, 0.5895, 0.7595, 0.2795, 0.3695, 0.6195, 0.0595, 0.1095, -0.1405,	0.15255	0.0437318	0.147, 0.132, 0.083, 0.119, 0.215, 0.213, 0.154, 0.152, 0.13, 0.127, 0.108, 0.169, 0.199, 0.121, 0.15, 0.135, 0.196, 0.105, 0.138, 0.258,	1.0749	1.05484	1.3381, 1.6251, 0.6211, 1.3021, 1.4551, 0.7131, 2.0611, 0.8971, 0.9831, 2.0381, 2.8851, 1.7441, 2.4931, -0.0079, -0.5089, -0.0619, 0.6761, -0.1939, 2.3871, -0.9489,
AT1G76920			F-box family protein;(source:Araport11)	501683127,501683127,5891,5891,501707007,501728802,501739720,501766236	11019805,11019805,11077244,11077244,12795696,18775970,20736450,27247031	-0.76333	0.327815	-0.793333333, -0.883333333, -0.853333333, -0.623333333, -1.003333333, -0.983333333, -1.103333333, -1.193333333, -0.863333333, -0.883333333, 0.186666667, -0.863333333, -0.743333333, -0.483333333, -0.693333333, -1.013333333, -1.073333333, -0.653333333, -0.593333333, -0.153333333,	0.15215	0.0551059	0.155, 0.101, 0.161, 0.079, 0.117, 0.129, 0.111, 0.153, 0.1, 0.127, 0.229, 0.14, 0.199, 0.052, 0.173, 0.14, 0.194, 0.216, 0.283, 0.184,	1.27728	0.954438	1.450277778, 1.117277778, 1.269277778, 1.592277778, 1.295277778, 0.698277778, 1.866277778, 1.391277778, 2.346277778, 1.387277778, 1.238277778, 0.263277778, 2.601277778, 3.244277778, 2.269277778, 0.225277778, 0.671277778, -0.438722222, -0.502722222, 1.560277778,
AT1G77000	SKP2B	ARABIDOPSIS HOMOLOG OF HOMOLOG OF HUMAN SKP2 2 ATSKP2;2; SKP2B	AtSKP2;2 is a homolog of human SKP2, the human F-box protein that recruits E2F1. Contains an F-box motif at the N-terminal region and a C-terminal Leu-rich repeat domain. Forms part of an E3-ubiquitin-ligase SCF (Skp1, cullin, F-box) complex and recruits phosphorylated AtE2Fc, a transcriptional factor that might play a role in cell division and during the transition from skotomorphogenesis to pho…	501683127,501683127,5891,5891,501682621,501682926,501712377,501712764,501719313,501719313,501719703,501725136,501728802,501750288,501772510,501775261	11019805,11019805,11077244,11077244,12383089,12468727,15047898,15282545,16807682,16807682,16920782,18552355,18775970,22837358,24879433,28441590	0.43925	0.593408	1.082, 0.442, -0.068, 0.622, 0.032, 0.812, 1.062, 0.612, 0.722, 1.092, 0.442, 0.192, 2.942, -0.038, 0.072, -0.498, -0.048, -0.188, 0.182, 0.572, 0.952, -0.258, 0.442, 0.072, 0.452, 0.432, 1.042, 0.762, 0.922, 0.652, 0.802, 0.602, 0.012, 0.302, -0.418, -0.358, 0.432, 0.332, 0.102, 0.252,	0.187625	0.0619895	0.25, 0.272, 0.258, 0.237, 0.194, 0.261, 0.19, 0.217, 0.177, 0.317, 0.119, 0.087, 0.179, 0.116, 0.167, 0.133, 0.08, 0.139, 0.28, 0.251, 0.186, 0.189, 0.186, 0.186, 0.235, 0.159, 0.266, 0.224, 0.299, 0.231, 0.145, 0.135, 0.155, 0.114, 0.162, 0.111, 0.076, 0.216, 0.165, 0.141,	1.20158	1.02909	2.3929, 0.7139, 1.1509, 1.9689, 0.0889, 0.9369, 0.2809, 1.8569, 3.2709, 2.3469, 1.9309, 1.4429, 0.8719, 1.1399, 1.2539, 1.3059, 0.5939, 0.8149, 0.6089, 0.2799, 2.3479, 1.4789, 1.5819, -0.2891, -1.1221, 0.9459, 1.9329, 3.4909, 2.1849, 0.6539, 1.0049, 1.7109, -0.7941, 0.1559, 1.9789, 0.3229, 2.9859, 1.3199, -0.2901, 1.2109,
AT1G78100	AUXIN UP-REGULATED F-BOX PROTEIN 1 AUF1	AUXIN UP-REGULATED F-BOX PROTEIN 1 AUF1	F-box family protein;(source:Araport11)	501711705,501718900,501744988,501766236	14648238,16621846,21653785,27247031	0.401114	0.56024	-0.140666667, 0.299333333, 0.019333333, -0.410666667, 0.329333333, 0.199333333, 0.7575, 0.1775, 0.8175, 0.5275, 0.8575, 0.3975, 0.2275, 0.2575, 0.2175, 0.3575, 1.3075, 1.1375, 0.4075, 0.8175, 0.9075, 2.2675, 1.2675, 0.0475, 0.3775, 0.8775, -0.239666667, -0.159666667, 0.030333333, -0.269666667, -0.409666667, -0.219666667, 0.090333333, 0.550333333, 0.360333333,	0.176943	0.0555719	0.113, 0.107, 0.128, 0.205, 0.207, 0.086, 0.126, 0.221, 0.079, 0.144, 0.163, 0.202, 0.251, 0.285, 0.18, 0.098, 0.153, 0.206, 0.15, 0.194, 0.17, 0.182, 0.163, 0.165, 0.105, 0.192, 0.165, 0.206, 0.141, 0.314, 0.163, 0.255, 0.259, 0.204, 0.211,	0.385489	1.11812	0.769066667, 1.505066667, 1.147066667, -0.642933333, 1.899066667, 0.562066667, 2.27405, -0.60095, 1.65105, 1.83605, 0.92605, -0.12295, -1.67095, 0.17205, 1.75505, 1.09305, -0.78895, -0.36695, -0.90695, -0.03395, 1.85605, 1.08205, 1.10605, 1.18405, 1.01405, -1.65495, 0.845966667, 0.961966667, 0.555966667, -0.691033333, -0.509033333, 0.496966667, -0.624033333, -0.880033333, -1.707033333,
AT1G78280			transferases, transferring glycosyl groups;(source:Araport11)	501681836,501727266,501728802	12169662,18650403,18775970	0.340167	0.676548	0.1335, 1.3535, 1.0235, 0.2735, 1.2935, 0.9435, 1.2735, 0.8135, 0.4335, 0.3335, 0.0835, 0.0235, -0.2865, 0.2135, 0.0835, -0.0065, 0.9035, -0.2265, 1.6135, 0.0935, -0.6265, -0.5765, 0.3835, 0.5935, 0.0235, 0.5935, 1.0635, 0.8735, -0.0165, 0.0035, -0.5165, 0.6435, -0.5765, -0.5065, 2.0735, -0.2165, -0.4465, -0.5965, 0.7235,	0.234564	0.0810655	0.297, 0.258, 0.197, 0.372, 0.344, 0.333, 0.291, 0.358, 0.232, 0.133, 0.142, 0.346, 0.223, 0.341, 0.339, 0.136, 0.347, 0.238, 0.168, 0.12, 0.247, 0.289, 0.117, 0.153, 0.237, 0.2, 0.244, 0.137, 0.231, 0.133, 0.245, 0.298, 0.212, 0.243, 0.132, 0.297, 0.193, 0.25, 0.075,	-0.183292	1.31483	-1.2056, -0.2056, -0.7416, -1.1886, -0.7356, 0.1314, 0.8394, -0.4376, -1.0826, 0.7744, -0.8406, -1.5806, -1.6676, -0.8526, -3.0316, 1.5234, 0.3434, -1.2206, -1.1036, 1.6174, -0.7396, 1.8494, 0.9134, 3.1914, -0.1956, 0.6974, 0.2884, 1.0394, 1.3334, 0.5234, -1.2486, -0.7226, -1.4956, -0.8336, 1.7954, -0.9896, -0.1736, -2.7566, 1.0404,
AT1G78750			F-box/RNI-like superfamily protein;(source:Araport11)			-0.149875	0.386545	-0.00425, 0.69575, -0.07425, 0.24575, 0.15575, -0.03425, 0.25575, 0.04575, -0.29425, 0.46575, 0.52575, -0.09425, -0.41425, -0.17425, -0.04425, -0.54425, -0.15425, -0.55425, -0.01425, 0.36575, -1.0045, -0.1045, -0.1945, -0.1645, 0.1355, -0.6545, 0.1755, -0.2945, 0.0655, -0.1145, 0.1455, -0.1445, -0.3745, -0.3745, -0.9245, -0.7945, -0.6345, -0.0845, -0.2445, -0.7645,	0.134275	0.0406082	0.137, 0.17, 0.159, 0.136, 0.146, 0.102, 0.098, 0.161, 0.241, 0.151, 0.206, 0.164, 0.146, 0.155, 0.092, 0.132, 0.102, 0.146, 0.069, 0.087, 0.156, 0.09, 0.12, 0.2, 0.149, 0.178, 0.206, 0.073, 0.094, 0.15, 0.166, 0.11, 0.083, 0.134, 0.156, 0.128, 0.081, 0.085, 0.103, 0.109,	1.01434	0.951593	-0.0294, 0.3886, -0.4664, 0.5836, 1.4106, 0.5246, 1.5356, 0.1226, 0.6096, 0.5426, 1.2216, 0.1806, 0.1436, 1.5226, 0.4916, 0.5036, 0.6996, 1.2296, 2.1406, 1.1876, 1.547375, 2.927375, 0.161375, 1.973375, 1.729375, -1.467625, 2.046375, 1.184375, 2.489375, 1.106375, 1.825375, 2.549375, 1.428375, 0.180375, -0.638625, 2.335375, 0.352375, 2.189375, 1.331375, 0.779375,
AT1G78760			F-box/RNI-like superfamily protein;(source:Araport11)			-0.0286228	0.666477	0.207368421, -0.132631579, -0.362631579, -0.562631579, 0.127368421, -0.322631579, -0.722631579, -0.842631579, -0.502631579, -0.552631579, 0.425384615, -0.204615385, -0.154615385, -0.554615385, -0.204615385, -0.444615385, -0.144615385, -0.174615385, 2.425384615, 0.755384615, 0.035384615, -0.104615385, 0.255384615, 0.935384615, 0.105384615,	0.21556	0.0689463	0.184, 0.293, 0.289, 0.127, 0.115, 0.195, 0.184, 0.203, 0.219, 0.208, 0.398, 0.178, 0.316, 0.211, 0.298, 0.241, 0.288, 0.164, 0.246, 0.226, 0.125, 0.159, 0.216, 0.182, 0.124,	1.38439	1.0561	0.736578947, 2.183578947, 3.313578947, 2.571578947, 1.542578947, -0.734421053, 0.262578947, 0.158578947, 1.285578947, 1.427578947, 0.377666667, -0.443333333, 2.550666667, 0.872666667, 1.086666667, 2.359666667, 2.342666667, 1.699666667, 2.419666667, 0.383666667, 1.144666667, 0.952666667, 1.898666667, 3.010666667, 1.205666667,
AT1G80110	PHLOEM PROTEIN 2-B11 PP2-B11	PHLOEM PROTEIN 2-B11 ATPP2-B11;PHLOEM PROTEIN 2-B11 PP2-B11	phloem protein 2-B11;(source:Araport11)	501682998,501707007,501711432,501711697,501712376,501762519,501764651,501776308,501776497	12529520,12795696,14617066,14651343,15047901,25450686,26041321,28724081,28787436	0.19225	0.410036	0.42575, 0.06575, 0.42575, 0.39575, 0.45575, 0.14575, -0.06425, -0.07425, -0.18425, 0.70575, 1.41575, 0.08575, 0.34575, 0.00575, 0.05575, 0.05575, 0.10575, 0.24575, -0.12425, -0.64425,	0.13135	0.0333455	0.113, 0.144, 0.109, 0.191, 0.091, 0.088, 0.148, 0.1, 0.197, 0.149, 0.153, 0.097, 0.148, 0.151, 0.172, 0.131, 0.116, 0.095, 0.092, 0.142,	1.05445	1.16048	1.7106, -0.2384, 0.5796, 0.3406, 2.1826, 1.6556, 0.6856, 0.8906, -1.9054, 1.1046, 3.8186, 1.1046, 0.0436, 1.3676, -0.0554, 1.2756, 1.0256, 2.2626, 1.7726, 1.4676,
AT1G80440	KISS ME DEADLY 1 KMD1	KELCH REPEAT F-BOX 20 KFB20;KISS ME DEADLY 1 KMD1	Encodes a member of a family of F-box proteins, called the KISS ME DEADLY (KMD) family, that targets type-B ARR proteins for degradation and is involved in the negative regulation of the cytokinin response. Also named as KFB20, a member of a group of Kelch repeat F-box proteins that negatively regulate phenylpropanoid biosynthesis by targeting the phenypropanoid biosynthesis enzyme phenylalanine …	501682584,501707007,501713175,501713164,501714247,501720811,501721640,501724201,501724035,501730034,501754943,501757837,501766236,501727880	12407186,12795696,15375205,15377757,15489280,17217462,17478635,18252252,18305208,19291320,23720308,24363316,27247031,	0.0835	0.514959	-0.138, 0.802, -0.028, 0.032, 0.142, -0.388, -0.148, 1.052, -0.118, 0.072, -0.038, 0.562, 0.092, 0.552, 0.972, 0.042, 0.322, 0.092, -0.368, -0.188, -0.578, -0.668, -0.778, 0.082, -0.568, 0.272, -0.438, 0.052, 0.392, 0.132, -0.238, 0.282, 0.892, 0.282, 0.472, 0.272, 0.472, -1.478, 0.242, 0.922,	0.156175	0.0545071	0.192, 0.251, 0.091, 0.088, 0.124, 0.144, 0.122, 0.319, 0.149, 0.122, 0.164, 0.224, 0.134, 0.16, 0.194, 0.065, 0.258, 0.127, 0.151, 0.194, 0.098, 0.155, 0.135, 0.128, 0.13, 0.134, 0.148, 0.121, 0.306, 0.138, 0.103, 0.16, 0.154, 0.114, 0.123, 0.165, 0.169, 0.208, 0.15, 0.135,	1.2398	1.05326	-0.342, -0.308, 1.238, 0.883, 0.298, -0.552, 1.335, 0.376, 0.271, 1.426, 2.204, 0.61, 2.141, 1.308, 1.082, 2.804, 0.708, 1.246, 0.174, 0.791, 0.985, 1.256, 1.714, 0.941, 0.729, 1.365, 0.484, 0.573, 0.646, 1.576, 1.286, 2.001, 2.702, 1.171, 2.377, 1.256, 1.759, 1.478, 1.985, 5.615,
AT1G80570			RNI-like superfamily protein;(source:Araport11)	501683127,501683127,5891,5891,501736447	11019805,11019805,11077244,11077244,20226671	0.215833	0.480102	0.145, -0.295, -0.435, -0.115, -0.365, -0.105, -0.415, -0.025, -0.005, 1.225, 0.80825, -0.02175, 0.68825, -0.40175, 0.11825, -0.16175, 0.44825, -0.21175, 0.03825, 0.96825, 0.48825, -0.17175, 1.12825, 0.56825, 0.68825, 0.15825, 0.43825, 0.19825, 0.19825, 0.89825,	0.157067	0.0417686	0.237, 0.126, 0.149, 0.154, 0.159, 0.126, 0.13, 0.11, 0.125, 0.09, 0.184, 0.184, 0.136, 0.167, 0.177, 0.152, 0.113, 0.195, 0.109, 0.157, 0.163, 0.104, 0.132, 0.176, 0.254, 0.193, 0.191, 0.097, 0.195, 0.227,	1.33663	1.15286	-1.35865, 0.48735, 1.35635, 0.16035, -0.01165, 0.46635, 0.59035, 2.00935, 1.65935, 0.09735, 0.577075, 1.445075, 1.981075, 2.354075, 1.696075, 0.801075, 2.266075, 1.187075, 2.855075, 2.264075, 0.654075, 2.060075, 2.900075, 1.844075, 0.385075, 0.149075, 2.734075, 2.882075, -0.020925, 3.628075,
AT1G80960			F-box and Leucine Rich Repeat domains containing protein;(source:Araport11)	501723277,501727266	17964287,18650403	-0.20225	0.550392	-0.18175, 0.11825, -1.01175, -1.01175, -0.89175, -0.33175, -0.19175, -0.58175, -0.42175, 1.17825, -0.30175, -0.36175, 0.17825, -0.10175, -0.27175, -0.28175, -0.27175, -0.35175, 0.03825, 1.00825,	0.1511	0.0600017	0.12, 0.079, 0.158, 0.164, 0.215, 0.089, 0.131, 0.165, 0.152, 0.17, 0.19, 0.132, 0.112, 0.078, 0.288, 0.13, 0.129, 0.084, 0.143, 0.293,	1.46447	1.02702	2.995075, 2.799075, 1.311075, 1.032075, 0.180075, 1.483075, 0.604075, 0.792075, 0.951075, 1.856075, 1.459075, 1.215075, 2.919075, 2.169075, -0.897925, 2.127075, 1.982075, 0.629075, 2.960075, 0.723075,
AT2G01620	MATERNAL EFFECT EMBRYO ARREST 11 MEE11	MATERNAL EFFECT EMBRYO ARREST 11 MEE11	RNI-like superfamily protein;(source:Araport11)	501707007,501714637,501728802	12795696,15634699,18775970	-0.0532946	0.285801	0.303846154, -0.156153846, 0.313846154, -0.206153846, 0.243846154, 0.013846154, -0.226153846, -0.226153846, -0.166153846, -0.316153846, -0.416153846, 0.033846154, -0.406153846, 0.463846154,	0.134857	0.0418033	0.179, 0.088, 0.149, 0.134, 0.108, 0.087, 0.116, 0.131, 0.173, 0.157, 0.098, 0.223, 0.08, 0.165,	2.52249	0.701077	2.662846154, 2.406846154, 1.964846154, 2.369846154, 2.722846154, 2.896846154, 2.021846154, 2.481846154, 2.793846154, 1.877846154, 1.750846154, 4.603846154, 2.637846154, 2.122846154,
AT2G02300	PHLOEM PROTEIN 2-B5 PP2-B5	PHLOEM PROTEIN 2-B5 PP2-B5;PHLOEM PROTEIN 2-B5 AtPP2-B5	phloem protein 2-B5;(source:Araport11)	501682998,501710157,501710157,501776308	12529520,12912986,12912986,28724081	0.176085	0.589342	0.93925, 0.08925, -0.26075, -0.69075, -0.91075, -1.01075, -0.50075, -0.18075, -0.26075, -0.50075, -0.22075, 0.06925, -0.36075, -0.33075, -0.20075, -0.43075, -0.14075, -0.25075, 0.30925, 0.61925, 0.892666667, 0.522666667, 0.442666667, 0.452666667, -0.217333333, 0.442666667, 1.472666667, 0.032666667, 0.502666667, -0.407333333, 0.822666667, 1.202666667, 1.772666667, 0.922666667, 0.582666667, 0.75266…	0.164898	0.0566141	0.18, 0.063, 0.133, 0.131, 0.096, 0.089, 0.096, 0.119, 0.096, 0.136, 0.153, 0.187, 0.123, 0.155, 0.113, 0.087, 0.12, 0.125, 0.104, 0.107, 0.194, 0.271, 0.174, 0.128, 0.201, 0.197, 0.238, 0.18, 0.272, 0.083, 0.183, 0.22, 0.295, 0.213, 0.228, 0.15, 0.188, 0.208, 0.179, 0.187, 0.191, 0.149, 0.252, 0.275, 0.146, 0.183, 0.223, 0.233, 0.09, 0.163, 0.233, 0.213, 0.156, 0.105, 0.175, 0.183, 0.18, 0.068, …	1.12514	1.31758	2.262, 2.233, 1.586, 1.586, 1.73, 2.341, 2.806, 2.23, 1.844, 3.301, 0.721, 2.735, 2.724, 1.492, 1.9, 2.351, 2.956, 3.263, 2.109, 1.841, -0.1683, -1.6193, -0.2863, 0.8287, 1.4277, -0.1093, 0.0687, 0.1747, -0.0713, 1.7427, -1.4643, -0.1663, 0.6537, 0.2977, -0.3083, 0.6547, -0.6623, -1.2563, 1.1607, 0.3547, 0.5597, 2.0957, -0.3393, -0.3353, 3.9997, 1.8947, -0.5593, 0.0257, 2.7377, 0.6617, -0.2083, 0…
AT2G02340	PHLOEM PROTEIN 2-B8 PP2-B8	PHLOEM PROTEIN 2-B8 AtPP2-B8;PHLOEM PROTEIN 2-B8 PP2-B8	phloem protein 2-B8;(source:Araport11)	501682998,501739720,501776308	12529520,20736450,28724081	0.39575	0.436589	0.4175, 0.0975, 0.4175, 0.1575, 0.3975, 0.5075, 0.4675, 0.4975, 0.3575, 1.0775, 0.6175, 0.6875, 0.7575, 0.5175, 0.5475, 0.6275, 2.4175, 0.3875, -0.1025, 0.8675, 0.4375, 0.4575, 0.0475, 0.3175, 0.1975, 0.4575, -0.0925, 0.0375, 0.0375, 0.3275, 0.7275, 0.2775, 0.1675, -0.1725, 0.1775, -0.0825, -0.2125, 0.5075, 0.2375, 0.2575,	0.150275	0.0323292	0.162, 0.115, 0.166, 0.101, 0.09, 0.112, 0.131, 0.203, 0.165, 0.116, 0.2, 0.182, 0.163, 0.107, 0.15, 0.146, 0.19, 0.15, 0.143, 0.111, 0.18, 0.206, 0.16, 0.165, 0.152, 0.112, 0.113, 0.143, 0.16, 0.115, 0.172, 0.108, 0.15, 0.198, 0.191, 0.152, 0.197, 0.162, 0.115, 0.157,	0.13925	0.835095	-0.45395, -0.55995, 0.25505, 0.84805, 1.94405, 1.23505, 0.88705, 1.18505, 0.11905, 1.44905, -0.78595, -0.00395, 0.36405, 0.97605, -0.23395, -0.41995, 1.42405, 0.17805, -1.13995, 0.34305, 0.94505, -0.36395, -0.32995, 1.16105, -0.47495, 1.16505, -0.11095, 0.17905, -0.53795, 0.43805, -0.39395, -0.54495, -1.06995, -1.17495, -0.24895, -1.04295, -0.89395, 0.81305, 1.05105, -0.60495,
AT2G02350	SKP1 INTERACTING PARTNER 3 SKIP3	SKP1 INTERACTING PARTNER 3 SKIP3;PHLOEM PROTEIN 2-B9 AtPP2-B9; ATPP2-B9	encodes a protein containing an F-box domain and physically interacts with SCF subunit SKP1/ASK1. The protein also exhibits similarity in sequence to phloem protein 2 (PP2) from cucumber.	1346131,501682998,501728802,501776308	11387208,12529520,18775970,28724081	0.50725	0.655376	0.945, 0.155, 0.245, 1.305, -0.325, -0.045, 0.185, 0.165, -0.325, -0.015, 0.515, 0.545, 0.985, 0.405, 0.385, 0.655, 1.045, -0.095, 0.785, -0.315, 0.602666667, 0.872666667, 1.232666667, 0.012666667, 0.712666667, 1.092666667, 0.232666667, 0.172666667, 0.682666667, 0.712666667, 0.672666667, 0.662666667, 1.092666667, 1.012666667, 1.222666667, 0.832666667, 1.422666667, 0.022666667, 0.072666667, -0.487…	0.171429	0.113256	0.184, 0.151, 0.185, 0.175, 0.253, 0.281, 0.186, 0.149, 0.229, 0.145, 0.218, 0.191, 0.257, 0.1, 0.101, 0.188, 0.141, 0.144, 0.157, 0.107, 0.119, 0.065, 0.14, 0.111, 0.103, 0.109, 0.127, 0.119, 0.171, 0.163, 0.169, 0.12, 0.158, 0.12, 0.258, 0.137, 0.208, 0.152, 0.194, 0.135, 0.131, 0.148, 0.097, 0.185, 0.934, 0.247, 0.101, 0.144, 0.137, 0.147, 0.143, 0.154, 0.16, 0.151, 0.158, 0.143,	1.09154	1.2695	2.4533, 1.3993, 0.9383, 4.6093, -1.4817, 2.5363, 0.3403, 0.9693, -0.2447, 1.6973, 2.6233, 1.9673, 2.3893, 2.2153, 3.5003, 1.9873, 2.7853, 2.8643, 2.5373, 1.5573, 1.4107, -0.5623, 1.4957, 0.0397, 1.1577, 0.7037, 1.2417, 0.5387, 0.4447, -1.2813, -0.0993, 1.4927, 0.8907, 0.3167, -1.2133, 0.5077, 0.8817, 0.6227, 0.3347, 0.3327, 1.1567, 0.9117, 2.2157, 0.2117, 3.6967, -1.1883, 2.7927, 0.8717, 0.6667, …
AT2G02360	PHLOEM PROTEIN 2-B10 PP2-B10	PHLOEM PROTEIN 2-B10 AtPP2-B10;PHLOEM PROTEIN 2-B10 PP2-B10	Encodes an F-box protein containing a Nictaba-related lectin domain that can act as a carbohydrate-binding protein.Expression is induced by SA and pathogenic bacteria.	501682584,501682998,501712002,501728734,501755274,501771805,501776308	12407186,12529520,14749489,18793148,23650594,27716048,28724081	0.5125	0.367046	0.4575, 1.5275, 0.5275, 0.4775, 1.1775, 0.1975, 0.2375, 0.2275, 0.4775, 0.4275, 0.9575, 0.1575, 1.2875, 0.8475, 0.6075, 0.2875, 0.5075, 1.0575, 0.7275, 0.7375, 0.5375, -0.2525, 0.2975, 0.1775, 0.2775, 0.4375, 0.1575, -0.0225, -0.1325, 0.4475, 0.7475, 0.8375, 0.3075, 0.6575, 0.4875, 0.7875, 0.4075, 0.4475, 0.3075, 0.6775,	0.14255	0.0434281	0.088, 0.163, 0.096, 0.144, 0.134, 0.233, 0.085, 0.161, 0.252, 0.103, 0.144, 0.125, 0.151, 0.146, 0.179, 0.15, 0.205, 0.114, 0.186, 0.139, 0.123, 0.205, 0.202, 0.147, 0.114, 0.118, 0.09, 0.155, 0.129, 0.103, 0.132, 0.048, 0.222, 0.168, 0.114, 0.112, 0.165, 0.128, 0.124, 0.105,	0.04605	1.14514	0.33005, 1.19005, -0.46095, 0.74905, 1.53905, -3.38195, -0.23795, -0.02995, -2.46995, -0.01895, -0.35895, -1.36195, 0.65205, 0.19305, -0.65095, -1.93795, -0.83195, 0.98105, -0.15995, 0.08005, 1.24305, -1.11295, -0.98595, 1.69005, 1.10405, 0.14705, 1.29605, -0.07095, 1.25305, 1.32305, -1.79795, 0.28405, -0.68595, 0.52705, 0.37805, 0.95705, -0.12495, 1.02005, 0.36805, 1.21705,
AT2G02870			Galactose oxidase/kelch repeat superfamily protein;(source:Araport11)	501707007,501707001,501717819,501721149,501728802,501741056	12795696,12795706,16258011,17337630,18775970,21119043	-0.1875	0.359244	-0.587, -0.847, 0.003, -0.687, -0.667, -0.247, -0.107, 0.183, -0.077, 0.073, -0.447, -0.407, -0.437, -0.267, -0.927, -0.647, 0.023, -0.627, -0.337, 0.543, -0.017, 0.513, -0.137, 0.073, -0.167, -0.067, -0.327, -0.307, 0.003, 0.383, -0.247, 0.043, -0.177, 0.453, -0.237, -0.527, 0.303, -0.287, -0.387, 0.103,	0.1309	0.0470765	0.126, 0.119, 0.209, 0.216, 0.076, 0.169, 0.066, 0.115, 0.194, 0.204, 0.129, 0.15, 0.174, 0.087, 0.171, 0.171, 0.142, 0.102, 0.096, 0.094, 0.148, 0.113, 0.142, 0.107, 0.08, 0.089, 0.123, 0.25, 0.197, 0.131, 0.143, 0.089, 0.057, 0.078, 0.177, 0.113, 0.138, 0.074, 0.089, 0.088,	1.43615	0.748888	0.814975, 0.837975, 1.444975, 0.599975, 1.374975, 1.177975, 2.621975, 2.370975, 1.858975, 2.242975, 1.214975, -0.140025, 0.779975, 2.013975, -0.656025, 1.723975, 1.028975, 1.157975, 1.848975, 1.676975, 0.453975, 2.612975, 0.514975, 1.362975, 1.768975, 1.706975, 2.231975, 0.668975, 1.760975, 2.137975, 1.127975, 1.801975, 2.107975, 2.112975, 0.344975, 1.373975, 1.318975, 1.963975, 1.557975, 2.51897…
AT2G17030	SKP1/ASK-INTERACTING PROTEIN 23 SKIP23	ATSKIP23;SKP1/ASK-INTERACTING PROTEIN 23 SKIP23	Encodes a SKP1/ASK-interacting protein.	501707007,501774412	12795696,28189687	0.14375	0.70272	0.20825, -0.17175, -0.89175, -0.25175, -0.06175, -0.12175, -0.62175, -0.26175, -0.35175, 0.03825, 0.53825, 0.28825, 0.35825, 0.40825, 0.67825, 0.22825, 2.64825, 0.14825, -0.12175, 0.18825,	0.15965	0.0563189	0.14, 0.136, 0.09, 0.16, 0.097, 0.141, 0.153, 0.109, 0.19, 0.224, 0.121, 0.08, 0.091, 0.294, 0.195, 0.198, 0.235, 0.177, 0.215, 0.147,	1.82237	0.944906	2.470075, 2.415075, 3.745075, 0.560075, 2.419075, 1.611075, 1.048075, 2.256075, 3.464075, 0.630075, 1.337075, 2.644075, 1.933075, 2.798075, 1.435075, 1.342075, 1.551075, 1.676075, 0.414075, 0.698075,
AT2G18280	TUBBY LIKE PROTEIN 2 TLP2	TUBBY LIKE PROTEIN 2 AtTLP2;TUBBY LIKE PROTEIN 2 TLP2	Member of TLP family The mRNA is cell-to-cell mobile.	1345963,1345963,501712329,501713039,501715244,501718569,501718924,501728802,501750528,501760944,501766236,501773573,501737215,501737216	11118137,11118137,15064372,15310832,15834137,16463051,16615871,18775970,22751378,25168737,27247031,27934866,,	0.188875	0.50647	1.192, 0.972, 0.342, 0.512, 0.222, 0.662, 0.662, 0.542, -0.418, 1.102, 1.142, 0.982, -0.238, 0.552, 0.542, 0.002, 0.442, -0.258, 0.132, 0.412, 0.182, 0.012, -0.688, 0.942, 0.302, -0.008, 0.442, -0.448, 0.592, 0.372, 0.222, -0.108, -0.068, -0.588, 0.482, -0.318, 0.282, 0.062, 0.072, 0.142, 0.3815, -0.2385, 0.1915, -0.5485, 0.2915, -0.7285, 0.2615, 0.6015, 0.3515, -0.1185, -0.4885, -0.2885, -0.4285…	0.155613	0.0572763	0.164, 0.137, 0.216, 0.158, 0.14, 0.168, 0.143, 0.184, 0.213, 0.163, 0.158, 0.195, 0.109, 0.195, 0.265, 0.129, 0.101, 0.09, 0.139, 0.158, 0.209, 0.124, 0.15, 0.182, 0.085, 0.148, 0.173, 0.11, 0.097, 0.13, 0.25, 0.245, 0.364, 0.366, 0.272, 0.121, 0.156, 0.216, 0.121, 0.089, 0.149, 0.095, 0.126, 0.14, 0.115, 0.231, 0.14, 0.122, 0.133, 0.1, 0.163, 0.133, 0.172, 0.152, 0.155, 0.111, 0.121, 0.127, 0.1…	1.51526	1.08259	2.0309, 1.8509, 0.7609, 0.9179, 1.1289, 2.0889, 1.7029, 1.9169, -1.6251, 1.5359, 2.3839, 1.8429, -0.4411, 0.3569, 1.1649, 1.6819, 0.6439, 0.4159, 1.2589, 1.6299, 0.7889, 1.0189, 1.5449, 2.5759, -0.7091, 0.9909, 2.9409, 2.3499, 2.4079, 2.1219, 1.2159, 0.9609, -1.3681, -0.1381, 2.1029, 0.6839, 1.7559, 0.7609, 1.4009, 1.7219, 2.6831, 1.8021, 2.3681, 0.5441, 2.9261, -0.8029, 2.3061, 3.2811, 2.6581, 2…
AT2G18780			F-box and associated interaction domains-containing protein;(source:Araport11)			0.37275	0.370037	0.38575, -0.16425, 0.33575, 0.02575, 0.12575, -0.11425, 0.07575, -0.14425, 0.04575, 0.14575, 0.64575, 0.78575, 1.04575, 0.31575, 0.85575, 0.47575, 0.81575, 0.39575, 0.59575, 0.80575,	0.14585	0.0430242	0.074, 0.258, 0.167, 0.156, 0.143, 0.105, 0.162, 0.148, 0.149, 0.127, 0.092, 0.197, 0.138, 0.208, 0.117, 0.125, 0.138, 0.089, 0.157, 0.167,	0.51905	0.679754	0.6416, -1.0574, 0.9726, 0.2166, 0.3776, -0.3674, -0.2154, 1.9376, 0.9006, 1.2636, 0.2596, 0.3236, 0.1656, 0.0506, 1.1776, 0.1456, 1.1166, 1.0196, 0.4036, 1.0486,
AT2G21680			Galactose oxidase/kelch repeat superfamily protein;(source:Araport11)	501680153	11516153	0.55125	0.501086	0.62475, 1.22475, 0.69475, 0.16475, 0.56475, -0.04525, 0.31475, 0.12475, 0.52475, -0.21525, 0.63475, 0.84475, 0.36475, 1.47475, 1.52475, 1.18475, 0.50475, 0.09475, 0.51475, -0.09525,	0.1566	0.0512788	0.182, 0.241, 0.272, 0.133, 0.126, 0.094, 0.148, 0.126, 0.067, 0.155, 0.097, 0.187, 0.122, 0.229, 0.137, 0.141, 0.137, 0.156, 0.183, 0.199,	1.79267	1.14404	1.839925, 1.646925, -0.198075, 2.428925, 3.325925, 0.583925, 2.363925, 0.926925, 3.290925, 0.563925, 1.611925, 4.177925, 1.297925, 1.103925, 1.370925, 1.731925, 1.035925, 3.279925, 0.634925, 2.834925,
AT2G22030			Galactose oxidase/kelch repeat superfamily protein;(source:Araport11)	501680153	11516153	-0.3055	0.607655	-0.029, 0.061, -0.249, -0.799, -0.629, -0.479, -0.759, -0.249, -0.059, -0.389, 1.941, -0.299, -0.829, -0.859, -0.679, -0.209, -0.229, -0.479, -0.829, -0.059,	0.14585	0.0289214	0.115, 0.112, 0.114, 0.153, 0.146, 0.154, 0.154, 0.112, 0.166, 0.17, 0.172, 0.158, 0.131, 0.087, 0.15, 0.145, 0.196, 0.164, 0.196, 0.122,	2.00685	1.13013	1.858, 3.399, 2.632, 2.129, 0.205, 2.095, 0.56, 2.598, 4.398, 2.573, 3.564, 1.811, 2.003, 2.067, 1.058, 2.77, 1.761, 1.408, -0.369, 1.617,
AT2G24540	ATTENUATED FAR-RED RESPONSE AFR	ATTENUATED FAR-RED RESPONSE AFR	Galactose oxidase/kelch repeat superfamily protein;(source:Araport11)	501682869,501707007,501719242,501721103,501753008	12481097,12795696,16829591,17360592,23226441	0.0799563	0.467298	0.249333333, 1.449333333, -0.650666667, -0.100666667, 0.039333333, -0.230666667, -0.110666667, 0.329333333, -0.060666667, 0.269333333, -0.050666667, -0.170666667, -0.310666667, 0.099333333, -0.090666667, 0.619333333,	0.144875	0.0405773	0.147, 0.108, 0.145, 0.101, 0.127, 0.155, 0.195, 0.192, 0.127, 0.158, 0.118, 0.153, 0.144, 0.249, 0.097, 0.102,	0.502504	0.90033	-1.300933333, 1.343066667, -0.239933333, 1.140066667, 1.392066667, -0.046933333, -0.841933333, 0.855066667, 0.062066667, 0.842066667, 0.291066667, 1.298066667, -0.583933333, 1.261066667, 0.930066667, 1.639066667,
AT2G26030			F-box/RNI-like/FBD-like domains-containing protein;(source:Araport11)	501682584	12407186	0.420875	0.633759	0.065, 0.025, -0.155, -0.775, -0.705, 0.095, 0.205, 0.155, 0.185, -0.165, 1.215, 1.425, 0.035, -0.315, 0.225, 0.225, 1.255, 0.015, 0.465, 0.545, 0.39475, -0.29525, -0.06525, 0.82475, 0.00475, -0.08525, 0.36475, 1.07475, 1.51475, -0.18525, 0.73475, 0.64475, 1.91475, 0.54475, 1.15475, 1.73475, 1.07475, 0.55475, 0.44475, 0.46475,	0.1711	0.0759628	0.28, 0.168, 0.129, 0.159, 0.157, 0.115, 0.1, 0.115, 0.072, 0.213, 0.187, 0.329, 0.204, 0.394, 0.091, 0.395, 0.17, 0.23, 0.12, 0.161, 0.094, 0.093, 0.158, 0.241, 0.069, 0.184, 0.176, 0.217, 0.128, 0.1, 0.134, 0.118, 0.214, 0.155, 0.153, 0.197, 0.121, 0.174, 0.127, 0.202,	1.51141	0.895732	0.60635, 0.82835, 1.90735, 1.69435, 1.88935, 1.86335, 2.33835, 2.02435, 2.18235, -0.08465, 1.96735, 0.88735, 2.08235, -0.05265, 1.29435, -0.26865, 1.97435, -0.13765, 2.10935, 2.22835, 1.338925, 1.791925, 1.205925, 0.301925, 0.751925, 0.845925, 0.127925, 1.800925, 1.683925, 1.785925, 2.074925, 2.827925, 3.194925, 1.989925, 1.908925, 2.925925, 2.791925, 0.407925, 2.026925, 1.337925,
AT2G29770			Galactose oxidase/kelch repeat superfamily protein;(source:Araport11)	501680153	11516153	0.098125	0.744149	3.031, 0.221, -0.769, -0.339, -0.129, -0.259, -0.309, -0.559, 0.571, -0.599, -0.259, -0.239, -0.569, -0.599, -0.979, -0.199, -0.519, -0.369, -0.549, -0.869, 0.23475, -0.13525, 0.15475, -0.03525, 0.11475, 0.31475, 0.31475, -0.08525, 0.62475, -0.26525, 0.83475, 1.33475, -0.48525, 0.77475, 0.60475, 0.89475, 0.59475, 0.68475, 0.90475, 0.83475,	0.14545	0.0544624	0.391, 0.121, 0.11, 0.189, 0.122, 0.135, 0.074, 0.089, 0.109, 0.114, 0.141, 0.218, 0.11, 0.117, 0.168, 0.205, 0.142, 0.103, 0.15, 0.14, 0.077, 0.091, 0.127, 0.13, 0.124, 0.117, 0.131, 0.072, 0.145, 0.155, 0.178, 0.182, 0.177, 0.178, 0.163, 0.159, 0.216, 0.182, 0.12, 0.146,	1.84469	0.94446	4.253, 3.246, 1.581, -0.356, 2.639, 1.189, 2.772, 2.516, 1.989, 3.615, 1.159, 0.742, 1.651, 1.695, 1.56, -0.197, 2.185, 1.933, 2.435, 1.433, 0.377925, 1.609925, 2.627925, 1.412925, 1.245925, 0.941925, 1.371925, 2.545925, 2.794925, 0.909925, 1.148925, 1.654925, 1.807925, 2.053925, 2.996925, 1.406925, 1.841925, 1.779925, 2.711925, 2.504925,
AT2G29910			F-box/RNI-like superfamily protein;(source:Araport11)	501705973	12753585	-0.0370009	0.420239	0.143846154, -0.046153846, -0.316153846, 0.333846154, 0.683846154, 0.303846154, 0.013846154, 0.083846154, -0.146153846, -0.156153846, -0.046153846, 0.743846154, 0.093846154, 0.093846154, 0.463846154, 0.663846154, 0.353846154, 0.213846154, -0.476153846, -0.256153846, 0.137368421, -0.142631579, -0.992631579, -0.422631579, -1.042631579, -0.142631579, -0.302631579, -0.272631579, 0.807368421, -0.15263…	0.184692	0.0636992	0.129, 0.148, 0.124, 0.19, 0.18, 0.124, 0.154, 0.176, 0.159, 0.106, 0.163, 0.182, 0.119, 0.1, 0.168, 0.147, 0.147, 0.106, 0.098, 0.178, 0.167, 0.341, 0.28, 0.293, 0.241, 0.196, 0.269, 0.18, 0.165, 0.159, 0.282, 0.245, 0.111, 0.173, 0.194, 0.328, 0.261, 0.243, 0.177,	1.32038	1.46608	2.924846154, 1.940846154, 1.922846154, 0.653846154, 3.016846154, 2.488846154, 2.654846154, 2.384846154, 1.292846154, 2.617846154, 2.295846154, 2.656846154, 1.090846154, 2.512846154, 1.904846154, 3.848846154, 2.842846154, 3.087846154, 1.652846154, 1.520846154, 2.025578947, -0.800421053, -1.005421053, -1.359421053, 0.942578947, 0.399578947, -1.037421053, -0.329421053, 1.985578947, 1.784578947, -0.2…
AT2G32560			F-box family protein;(source:Araport11)	501707643,501681663,501712377	12007405,12119417,15047898	0.0268989	0.45537	0.6295, 0.0195, -0.2005, 0.2295, 0.3195, 0.3795, 0.2295, 0.0395, 0.0395, 0.1595, -0.4005, -0.5305, -0.3605, -0.2005, -0.3605, -0.6105, 0.1295, -0.7205, -0.7805, -0.6905, 0.23, 0.67, 0.09, 0.11, -0.25, 0.41, 0.71, 1.23, 0.62, 0.1, -0.41, 0.34, 0.38, 0.16, 0.25, -1.03, 0.07, 0.01925, -0.38075, -0.91075, 0.88925, -0.51075, 0.63925, -0.58075, 0.58925, -0.07075, 0.84925, 0.00925, 0.11925, -0.55075, 0.…	0.157719	0.0618501	0.326, 0.159, 0.164, 0.118, 0.106, 0.189, 0.211, 0.141, 0.165, 0.204, 0.191, 0.226, 0.18, 0.189, 0.141, 0.226, 0.174, 0.16, 0.141, 0.128, 0.3, 0.155, 0.13, 0.142, 0.096, 0.111, 0.257, 0.198, 0.086, 0.12, 0.129, 0.177, 0.138, 0.153, 0.144, 0.493, 0.165, 0.085, 0.132, 0.137, 0.197, 0.071, 0.119, 0.14, 0.307, 0.102, 0.116, 0.164, 0.154, 0.167, 0.112, 0.132, 0.092, 0.101, 0.144, 0.094, 0.169, 0.123, …	1.80934	1.35129	2.5546, 1.6026, 2.1606, 3.2476, 1.6726, 1.6896, 2.6896, 1.2376, 2.2126, 3.6046, 0.9846, -0.6784, 3.9356, 1.8906, 0.0906, -1.0334, 2.2796, 2.7296, 3.2066, 1.7346, 0.3765, 3.0345, 1.9535, 0.8675, 1.6085, 1.5755, 3.2305, 3.0475, 1.4065, 2.3355, 0.0975, 3.1055, 2.4025, 1.8895, 1.8585, -1.9325, 1.2625, 3.638, 3.397, 2.689, 3.343, 3.395, 3.698, 2.609, 1.447, 2.554, 3.392, 2.664, 1.823, 0.433, 3.073, 3.…
AT2G33340	MOS4-ASSOCIATED COMPLEX 3B MAC3B	MOS4-ASSOCIATED COMPLEX 3B MAC3B, PUB60	Encodes MAC3B, a U-box proteins with homology to the yeast and human E3 ubiquitin ligase Prp19. Associated with the MOS4-Associated Complex (MAC). Involved in plant innate immunity.	501710523,501712079,501712079,501713289,501717816,501718077,501718077,501718077,501723872,501723872,501725142,501725142,501733455,501756092,501777081,501778778,501727982,501727982,501727982	14500793,15028209,15028209,15341630,16258015,16287169,16287169,16287169,18223036,18223036,18552200,18552200,19629177,23877244,28947490,29437988,,,	1.30775	0.911857	0.241, -0.009, 1.441, 0.961, 1.681, 1.871, 1.141, 1.501, 3.621, 1.431, 1.541, 1.131, 2.811, -0.279, 0.021, 0.401, 0.751, 0.641, 1.721, 2.031, -0.059, 0.561, 0.231, 0.411, 0.751, 1.871, 1.761, 2.151, 0.431, 2.441, 2.691, 2.121, 2.221, 0.961, 1.991, 1.781, 0.851, 2.321, 0.311, 1.861,	0.1888	0.0633574	0.208, 0.159, 0.195, 0.142, 0.261, 0.167, 0.333, 0.144, 0.342, 0.151, 0.137, 0.332, 0.134, 0.122, 0.179, 0.139, 0.21, 0.188, 0.051, 0.214, 0.151, 0.115, 0.162, 0.153, 0.239, 0.109, 0.145, 0.188, 0.126, 0.215, 0.155, 0.169, 0.209, 0.285, 0.218, 0.202, 0.2, 0.225, 0.198, 0.28,	-0.84575	1.20651	0.6419, -0.9881, -1.2601, -2.8731, -0.3201, -1.3551, -1.4911, -2.2481, 0.7839, -3.9231, 0.5329, -1.4441, -1.3801, -1.5361, -2.4621, -0.1291, -1.6801, -0.6801, 2.2159, -0.5281, -0.2711, 0.2419, 0.5209, -0.2301, -0.1681, -1.6001, -1.4321, -3.0931, 0.3699, -1.3941, -0.9031, 0.6299, -1.2641, -1.1131, -1.7581, -1.5611, 0.1889, -0.9721, -0.4161, 0.5189,
AT2G35930	PLANT U-BOX 23 PUB23	PLANT U-BOX 23 PUB23; ATPUB23	Encodes a cytoplasmically localized U-box domain containing E3 ubiquitin ligase that is involved in the response to water stress and acts as a negative regulator of PAMP-triggered immunity.	501710652,501718924,501720096,501721149,501722879,501722879,501723780,501727236,501727543,501728818,501728802,501728685,501750315,501752644,501760731,501765557,501765494,501771998,501773661,501776631,501781183,501734595	12946625,16615871,17041029,17337630,17722694,17722694,18070919,18664614,18684332,18771922,18775970,18805951,22829319,23170036,24998294,26163577,26188517,27747895,27956469,28837065,30185618,	-0.313875	0.570327	-0.3745, -0.1845, 0.7155, -0.5545, -0.6945, 0.6055, -0.3745, -0.3545, -0.4745, -0.3945, -0.9745, -0.4345, -0.1145, -1.4745, 0.5955, -0.5345,	0.166938	0.074944	0.099, 0.311, 0.223, 0.281, 0.104, 0.293, 0.121, 0.115, 0.11, 0.103, 0.127, 0.1, 0.14, 0.137, 0.19, 0.217,	1.07584	1.24423	2.1914, 0.4664, -0.1456, -0.2476, 2.2594, -0.4406, 2.1584, 2.5504, 1.5134, 1.9084, 0.5054, 2.5994, 1.7624, -0.7156, 1.6994, -0.8516,
AT2G36090			F-box family protein;(source:Araport11)	501718506,501775493	16489130,28505379	-0.0403495	0.63855	-0.67425, -0.13425, 0.25575, 0.19575, 0.11575, -0.13425, 0.08575, 0.02575, 0.21575, -0.29425, 0.59575, 0.23575, 1.69575, -0.02425, -0.02425, 0.62575, 1.12575, 2.26575, 1.51575, 0.76575, 0.834102564, 1.114102564, 0.364102564, 0.204102564, 0.134102564, 0.184102564, -0.285897436, 0.044102564, -0.225897436, 0.514102564, -0.505897436, -0.775897436, 0.004102564, -0.985897436, -0.615897436, -0.135897436…	0.1516	0.0405869	0.137, 0.158, 0.142, 0.124, 0.247, 0.112, 0.117, 0.125, 0.214, 0.115, 0.207, 0.197, 0.267, 0.18, 0.195, 0.071, 0.22, 0.189, 0.169, 0.219, 0.136, 0.161, 0.097, 0.151, 0.15, 0.158, 0.083, 0.133, 0.173, 0.154, 0.131, 0.119, 0.087, 0.12, 0.181, 0.125, 0.133, 0.153, 0.204, 0.066, 0.16, 0.181, 0.161, 0.169, 0.11, 0.125, 0.145, 0.176, 0.105, 0.144, 0.166, 0.163, 0.133, 0.101, 0.157, 0.189, 0.169, 0.129,…	1.16154	0.846035	-0.2914, -0.0764, 0.1266, -0.1014, -1.1204, -0.0884, 1.2706, 1.1296, 0.7046, 2.0346, 0.8396, 0.1956, 0.6616, 0.9476, 1.0476, 0.5846, 0.1106, 1.3586, 2.3136, 0.6056, 1.902589744, 2.057589744, 2.146589744, 1.406589744, 1.175589744, 0.802589744, 0.985589744, 2.123589744, 1.651589744, 1.807589744, 1.916589744, 0.725589744, 0.786589744, 0.770589744, -0.221410256, 1.368589744, 0.253589744, 1.192589744,…
AT2G39490			F-box family protein;(source:Araport11)	501727972	0	-0.322167	0.566582	-0.5105, -0.6005, -0.4905, -0.6205, -1.3005, -0.8605, -0.2805, -0.9305, -0.3705, -0.0305, -0.0105, 0.3595, 0.7995, 0.0495, -1.2305, 0.2595, -0.3405, 0.3095,	0.155667	0.0523664	0.099, 0.161, 0.15, 0.101, 0.166, 0.118, 0.148, 0.132, 0.146, 0.106, 0.134, 0.187, 0.194, 0.121, 0.232, 0.121, 0.175, 0.311,	1.39251	0.994307	2.1814, 0.5894, 1.2894, 3.0114, 0.5124, 1.5934, 1.3134, 1.2834, 2.2294, 1.9794, 2.6374, 2.4334, 0.9164, -0.0736, 1.0144, 2.4484, -0.0416, -0.2526,
AT2G40920			F-box and associated interaction domains-containing protein;(source:Araport11)			0.229	0.565085	0.7795, 1.1495, -0.1605, 0.0995, -0.2605, -0.0305, -0.9105, 0.2895, -0.3205, 0.5395, 1.3295, 0.3095, 0.2795, -0.4505, -0.1305, 0.1095, 0.9095, 0.2295, -0.0305, 0.8495,	0.1481	0.0664046	0.242, 0.155, 0.137, 0.108, 0.143, 0.075, 0.147, 0.068, 0.09, 0.138, 0.112, 0.098, 0.177, 0.153, 0.234, 0.195, 0.103, 0.115, 0.348, 0.124,	1.0922	1.25106	0.4491, 3.7651, 1.5241, 1.2851, 0.4351, 1.6841, 0.1651, 2.2941, 0.4591, 0.6911, 1.5521, 1.8041, -0.2669, 3.5681, 0.5541, -0.4159, 1.0041, 0.6941, -1.3779, 1.9761,
AT2G41170			F-box family protein;(source:Araport11)	501712377	15047898	0.05825	0.646585	0.47925, -0.34075, -0.29075, 1.07925, -0.09075, 0.58925, 0.24925, -0.39075, -0.08075, -0.27075, 0.44925, 0.74925, -0.50075, 0.17925, -0.10075, -1.50075, -0.26075, -0.19075, -0.12075, 1.52925,	0.1611	0.069774	0.149, 0.062, 0.096, 0.285, 0.094, 0.116, 0.206, 0.149, 0.107, 0.12, 0.243, 0.163, 0.123, 0.191, 0.113, 0.247, 0.112, 0.119, 0.317, 0.21,	1.827	0.789685	0.384, 3.027, 2.448, 1.734, 2.184, 2.594, 0.995, 2.513, 2.235, 2.227, 0.854, 0.681, 2.095, 2.494, 2.324, 0.757, 2.271, 2.17, 0.712, 1.841,
AT2G44030			Galactose oxidase/kelch repeat superfamily protein;(source:Araport11)	501680153,501711234	11516153,14576160	0.5985	1.39819	0.161, 0.041, -0.279, 0.651, -0.339, -0.099, 2.251, -0.049, 0.941, 1.771, 0.721, -0.529, -1.109, 0.801, -0.239, 0.201, -0.599, -0.109, -0.909, -0.749, 0.064, 4.484, -0.066, -0.086, 0.144, 4.004, -0.106, -0.376, 0.074, 0.084, 0.214, 1.014, 1.614, 0.254, -0.146, 4.084, 1.004, -0.276, 4.074, 1.354,	0.14425	0.0513279	0.132, 0.128, 0.165, 0.151, 0.122, 0.123, 0.225, 0.188, 0.1, 0.196, 0.098, 0.161, 0.133, 0.239, 0.202, 0.07, 0.112, 0.164, 0.218, 0.19, 0.279, 0.081, 0.129, 0.075, 0.09, 0.098, 0.113, 0.108, 0.207, 0.096, 0.092, 0.207, 0.202, 0.133, 0.098, 0.12, 0.187, 0.113, 0.111, 0.114,	1.71692	1.04344	2.624, 3.282, 2.045, 3.127, 2.057, 2.08, 2.39, 2.708, 4.88, 1.335, 2.37, 1.964, 1.66, 2.081, 2.106, 1.887, 0.713, 2.806, -0.097, 0.707, -0.6783, 0.1057, 1.0317, 1.3177, 1.2057, 0.4367, 1.1087, 0.3027, 1.0757, 0.7587, 2.0697, 2.4287, 1.8197, 2.9997, 1.9847, 0.9517, 2.0417, 1.2087, 1.9957, 1.7867,
AT2G44130	KISS ME DEADLY 3 KMD3	KELCH-DOMAIN-CONTAINING F-BOX PROTEIN 39 KFB39;KISS ME DEADLY 3 KMD3	Encodes a member of a family of F-box proteins, called the KISS ME DEADLY (KMD) family. Component of SCF ubiquitin protein ligase, interacts with phenylalanine ammonia-lyase. AtKFB39 is a homolog of previously identified AtKFB50 (At3g59940) and specifically interacts with Arabidopsis PAL3 and PAL4 in vitro. In planta, together with AtKFB01, KFB20 and KFB50, it regulates PAL protein stability thus…	501712377,501713273,501716333,501720811,501727266,501728685,501751432,501754943,501762220	15047898,15345049,15824099,17217462,18650403,18805951,23075039,23720308,25502410	0.270617	0.56779	0.91475, -0.24525, 0.11475, 0.59475, 1.27475, 0.72475, 1.10475, 0.03475, 0.12475, 0.24475, 0.84475, -0.12525, 0.49475, 0.50475, -0.04525, 0.45475, 0.48475, 0.63475, 0.39475, 1.06475, 0.72475, 0.35475, -0.13525, 0.41475, 1.32475, 0.56475, 1.82475, -0.51525, 0.30475, 0.46475, 0.48475, -0.31525, -0.27525, 0.07475, 0.50475, 0.52475, -0.07525, 0.31475, 0.71475, -0.845897436, -0.535897436, -0.825897436…	0.160263	0.0385614	0.134, 0.13, 0.154, 0.164, 0.225, 0.131, 0.12, 0.117, 0.218, 0.155, 0.17, 0.193, 0.173, 0.202, 0.18, 0.18, 0.141, 0.148, 0.12, 0.162, 0.183, 0.24, 0.184, 0.148, 0.242, 0.132, 0.152, 0.151, 0.117, 0.154, 0.142, 0.187, 0.156, 0.107, 0.167, 0.096, 0.19, 0.113, 0.195, 0.108, 0.13, 0.146, 0.175, 0.105, 0.137, 0.217, 0.143, 0.163, 0.209, 0.183, 0.153, 0.206, 0.168, 0.124, 0.125, 0.101, 0.269,	1.38023	1.10563	0.701525, 0.739525, 1.120525, -0.099475, 1.527525, 1.311525, 2.410525, -0.460475, -0.174475, 1.572525, 0.287525, 0.024525, 2.342525, 1.018525, 0.211525, 0.430525, 0.817525, 2.375525, 1.010525, 1.816525, 1.686525, 2.675525, 1.238525, 1.288525, 3.758525, 1.372525, 6.897125, 1.214525, 2.023525, 1.781525, 0.819525, 1.499525, 1.987525, 1.928525, 1.982525, 1.626525, 0.376525, 2.500525, 1.859525, 1.2725…
AT2G44630			Galactose oxidase/kelch repeat superfamily protein;(source:Araport11)	501680153,501681833	11516153,12169696	-0.06725	0.361198	0.0605, 0.1205, -0.3595, 0.1805, 0.1205, -0.2695, 0.4405, 0.4505, 0.3305, 0.4205, 0.4605, -0.0895, -0.1295, -0.0995, 0.1805, 0.4505, -0.2695, 0.0205, -0.4295, -0.4695, 0.4705, 0.0005, 0.1105, -0.0895, -0.1595, -0.1995, 0.0605, 0.0205, 0.0605, 0.0205, 0.1205, 0.1505, -0.3295, -0.6395, -0.9495, -0.7095, -0.9095, -0.3195, -0.1595, -0.3595,	0.22865	0.0918431	0.307, 0.223, 0.231, 0.353, 0.208, 0.291, 0.314, 0.406, 0.25, 0.151, 0.254, 0.382, 0.342, 0.319, 0.254, 0.319, 0.371, 0.365, 0.375, 0.359, 0.197, 0.113, 0.183, 0.163, 0.157, 0.17, 0.158, 0.138, 0.139, 0.148, 0.145, 0.198, 0.167, 0.11, 0.166, 0.125, 0.129, 0.139, 0.128, 0.199,	-0.023525	1.88696	-1.22085, -1.76285, -2.35785, -2.06685, -0.18085, -2.31485, -0.43585, -1.54885, -2.32185, -0.61585, 0.53115, -2.94385, -2.78385, -1.15085, -0.21485, -1.47085, -2.63085, -2.37785, -3.24885, -1.93485, 2.5654, 2.2384, 0.9874, 2.8104, 2.0274, 0.4194, 2.3844, 1.2394, 0.5854, 1.7704, 0.2334, 0.9924, 1.5144, 1.8114, 0.9374, 1.5404, 1.1944, 1.8864, 1.8024, 3.1704,
AT2G44700			Galactose oxidase/kelch repeat superfamily protein;(source:Araport11)	501680153,501711234	11516153,14576160	0.754545	1.43613	-0.317368421, 0.242631579, 0.862631579, -0.127368421, -0.267368421, -0.057368421, -0.047368421, 4.342631579, 2.632631579, 4.602631579, 3.532631579, 4.352631579, 0.022631579, 0.280789474, -0.559210526, -0.079210526, 0.590789474, 0.850789474, -0.039210526, -0.079210526, 0.000789474, 0.790789474, 0.450789474, 0.140789474, 0.370789474, 0.150789474, -0.429210526, 0.000789474, -0.009210526, 1.200789474…	0.208697	0.0791275	0.293, 0.18, 0.241, 0.28, 0.221, 0.235, 0.159, 0.427, 0.287, 0.148, 0.141, 0.468, 0.137, 0.16, 0.21, 0.25, 0.24, 0.14, 0.15, 0.21, 0.11, 0.16, 0.21, 0.13, 0.2, 0.11, 0.21, 0.15, 0.21, 0.18, 0.17, 0.23, 0.24,	0.513322	1.78242	-2.896157895, -0.005157895, 0.425842105, -2.093157895, -1.747157895, -3.288157895, -0.793157895, 0.722842105, -1.074157895, -2.159157895, 0.180842105, -0.906157895, -0.461157895, 2.598684211, 2.708684211, 1.378684211, 2.808684211, 2.758684211, 1.758684211, 0.078684211, 1.308684211, 3.198684211, 1.948684211, 0.588684211, 1.858684211, 0.028684211, 0.018684211, 0.728684211, 0.508684211, 2.018684211,…
AT2G45910	PUB33	PUB33	U-box domain-containing protein kinase family protein;(source:Araport11)	501683545,501711234,501719697,501727266,501742526,501766236	12644671,14576160,16920880,18650403,21477822,27247031	0.0343947	0.371492	0.1965, -0.3235, -0.3435, -0.5335, -0.2035, -0.2135, -0.2535, -0.2435, -0.2735, -0.0135, 0.5465, 0.2265, -0.3635, 0.0865, 0.3965, 0.5865, 0.4965, 0.2865, 0.5965,	0.17	0.0823273	0.24, 0.2, 0.13, 0.19, 0.08, 0.12, 0.14, 0.46, 0.16, 0.17, 0.11, 0.16, 0.1, 0.16, 0.1, 0.13, 0.21, 0.16, 0.21,	1.51228	0.887658	1.8747, -0.6373, 0.6447, 0.4657, 2.4257, 1.4587, 1.2447, 1.5567, 1.1867, 1.6967, 2.9607, 1.3107, 1.1377, 0.7007, 2.6417, 2.7087, 1.5247, 2.4457, 1.3857,
AT2G45920	PUB37	PUB37	U-box domain-containing protein;(source:Araport11)	501753994,501766236	23517122,27247031	0.276473	0.487561	0.648974, 0.098974, 1.518974, 0.138974, -0.46103, -0.47103, 0.078974, 0.238974, 0.038974, -0.22103, 0.798974, -0.21103, 0.088974, 0.408974, 0.398974, 0.478974, 0.628974, 0.458974, -0.07103, 0.938974,	0.13115	0.0344418	0.143, 0.089, 0.154, 0.104, 0.19, 0.15, 0.135, 0.143, 0.091, 0.094, 0.092, 0.204, 0.136, 0.097, 0.104, 0.129, 0.188, 0.123, 0.116, 0.141,	2.09956	1.47194	1.290103, 2.720103, 6.530303, 2.201103, -0.4409, 2.580103, 2.887103, 1.708103, 3.198103, 1.235103, 3.331103, -0.2109, 2.061103, 1.722103, 1.478103, 1.899103, 0.610103, 2.694103, 1.531103, 2.966103,
AT3G03030			F-box/RNI-like superfamily protein;(source:Araport11)			-0.104375	0.405988	-0.34175, -0.19175, -0.50175, -0.40175, -0.23175, -0.56175, -0.66175, -0.27175, 0.14825, -0.66175, 0.39825, -0.25175, -0.43175, -0.40175, -0.20175, -0.24175, -0.30175, -0.62175, -0.37175, -0.06175, 0.1205, -0.3095, -0.2095, -0.2295, 0.2205, -0.2495, -0.4195, -0.5795, -0.5295, 0.2405, 0.3305, 0.8405, 0.4705, 0.5105, 0.6805, -0.3095, 0.4705, 0.0805, 0.2805, 0.5805,	0.143225	0.0492271	0.155, 0.128, 0.11, 0.144, 0.096, 0.241, 0.182, 0.101, 0.127, 0.125, 0.292, 0.156, 0.131, 0.126, 0.151, 0.085, 0.173, 0.191, 0.158, 0.116, 0.126, 0.19, 0.135, 0.101, 0.224, 0.141, 0.23, 0.125, 0.095, 0.094, 0.068, 0.219, 0.164, 0.08, 0.125, 0.107, 0.164, 0.081, 0.107, 0.165,	1.41189	1.19978	-0.016925, 1.694075, 0.901075, 1.674075, 2.020075, -1.738925, -0.737925, 1.909075, 2.766075, 2.617075, 1.127075, 1.089075, 0.745075, 1.370075, 0.704075, 0.890075, 0.035075, -0.440925, 0.718075, 0.887075, 2.0064, 0.0284, 1.9104, 1.1114, 1.0944, 1.4034, 2.2874, 1.2594, 0.9814, 3.5814, 2.2594, 1.3144, 2.5794, 1.6544, 4.9664, 0.9984, 1.2324, 2.7924, 1.8974, 2.9044,
AT3G03360			F-box/RNI-like superfamily protein;(source:Araport11)	501714606,501716537	15659355,15937229	-0.245126	0.384683	-0.148125, -0.678125, -0.458125, -0.288125, -0.358125, -0.278125, -0.388125, -0.648125, -0.508125, -0.308125, 0.121875, 0.021875, -0.098125, -0.838125, -0.298125, 0.011875, -0.528125, -0.258125, 0.971875, 0.051875,	0.18265	0.0669047	0.142, 0.181, 0.207, 0.135, 0.23, 0.268, 0.243, 0.15, 0.239, 0.14, 0.293, 0.113, 0.19, 0.328, 0.118, 0.091, 0.185, 0.092, 0.172, 0.136,	-0.471187	0.916687	-0.0056875, -1.2256875, -0.5696875, -1.3886875, 0.0823125, -0.4936875, -0.8226875, -0.8926875, 0.8813125, 1.6483125, -1.4776875, 0.1503125, -2.0946875, -0.6636875, -0.8706875, -0.3556875, -1.3426875, -0.2406875, -0.7706875, 1.0293125,
AT3G06380	TUBBY-LIKE PROTEIN 9 TLP9	TUBBY-LIKE PROTEIN 9 TLP9;TUBBY-LIKE PROTEIN 9 ATTLP9	Member of TLP family	1345963,1345963,501712329,501712329,501719352,501722426,501727266,501750528,501760944	11118137,11118137,15064372,15064372,16792696,17597079,18650403,22751378,25168737	-0.00805263	0.250284	0.274102564, -0.475897436, 0.254102564, -0.285897436, 0.594102564, -0.505897436, -0.625897436, -0.025897436, 0.574102564, -0.065897436, -0.002578947, -0.021578947, -0.006578947, 0.011421053, -0.048578947, -0.052578947, -0.045578947, -0.010578947, 0.076421053, -0.053578947, -0.020578947, -0.010578947, 0.031421053, 0.118421053, -0.008578947, 0.020421053, 0.004421053, 0.008421053, 0.007421053, 0.050…	0.193067	0.0601721	0.123, 0.145, 0.124, 0.159, 0.112, 0.11, 0.113, 0.115, 0.171, 0.101, 0.221, 0.202, 0.217, 0.235, 0.175, 0.171, 0.178, 0.213, 0.3, 0.17, 0.203, 0.213, 0.255, 0.342, 0.215, 0.244, 0.228, 0.232, 0.231, 0.274,	1.20077	1.03222	1.972589744, 1.816589744, 1.838589744, 2.650589744, 1.856589744, 1.813589744, 1.904589744, 2.570589744, 2.358589744, 1.778589744, 1.229105263, -0.321894737, 1.018105263, 0.115105263, 1.410105263, 0.047105263, 2.624105263, -1.193894737, -1.003894737, 0.408105263, 0.719105263, 1.379105263, 1.285105263, 0.006105263, 0.913105263, 0.213105263, 1.569105263, 2.306105263, 1.714105263, 1.025105263,
AT3G06570			Galactose oxidase/kelch repeat superfamily protein;(source:Araport11)	501711234,501727266,501728802	14576160,18650403,18775970	0.0170095	0.451368	1.878421053, 0.328421053, 0.958421053, 0.508421053, 1.028421053, 0.678421053, 0.798421053, 0.698421053, 0.438421053, 0.828421053, 0.688421053, -0.061578947, 0.168421053, -0.421578947, -0.731578947, 0.458421053, -0.061578947, -0.701578947, 0.578421053, -0.191578947, -0.471578947, 0.008421053, -0.101578947, 0.188421053, 0.098421053, -0.211578947, -0.001578947, -0.071578947, -0.051578947, 0.30842105…	0.174638	0.0626629	0.303, 0.177, 0.218, 0.19, 0.31, 0.198, 0.226, 0.263, 0.225, 0.26, 0.207, 0.293, 0.201, 0.248, 0.125, 0.247, 0.254, 0.215, 0.149, 0.152, 0.404, 0.111, 0.212, 0.218, 0.318, 0.174, 0.159, 0.267, 0.203, 0.196, 0.16, 0.167, 0.224, 0.169, 0.107, 0.23, 0.173, 0.138, 0.137, 0.143, 0.148, 0.118, 0.187, 0.13, 0.1, 0.214, 0.095, 0.141, 0.121, 0.193, 0.114, 0.105, 0.172, 0.103, 0.089, 0.157, 0.163, 0.163, 0…	1.6158	0.809472	3.240473684, 2.391473684, 3.945473684, 2.156473684, 0.816473684, 2.365473684, 2.163473684, 2.230473684, 3.171473684, 1.220473684, 1.593473684, 1.515473684, 1.760473684, 0.428473684, 2.402473684, 0.899473684, 0.730473684, 0.876473684, 1.321473684, 2.633473684, 0.222473684, 1.672473684, 1.685473684, 2.154473684, 0.347473684, 1.720473684, 0.972473684, 1.548473684, 1.500473684, 3.167473684, 1.0984736…
AT3G07370	CARBOXYL TERMINUS OF HSC70-INTERACTING PROTEIN CHIP	CARBOXYL TERMINUS OF HSC70-INTERACTING PROTEIN ATCHIP;CARBOXYL TERMINUS OF HSC70-INTERACTING PROTEIN CHIP, PUB61	Encodes AtCHIP, a new class of E3 ubiquitin ligases with three tetratricopeptide repeats and a U-box domain, structurally similar to the animal CHIP proteins. Plays an important role in plant cellular metabolism under temperature stress conditions. Functions as an E3 ubiquitin ligase of protein phosphatase 2A subunits and alters plant response to abscisic acid treatment. Belongs to one of the 36 …	501706954,501718834,501720726,501722902,501727266,501728802,501735616,501739883,501756090,501759072,501764515	12805616,16640601,17241447,17714429,18650403,18775970,20028838,20856808,23878078,24497840,26085677	-0.287833	0.435196	-0.5445, -0.5345, -0.3545, -0.5045, -0.2845, -0.1845, 0.9855, 0.2055, -0.4545, -0.1345, -0.1945, -0.7145, -0.8745, -0.3645, -0.3645,	0.151133	0.0472454	0.11, 0.193, 0.154, 0.177, 0.135, 0.267, 0.082, 0.109, 0.161, 0.188, 0.121, 0.088, 0.161, 0.149, 0.172,	1.34607	0.665438	1.9074, 0.2334, 1.0424, 1.1504, 1.4014, 1.0764, 2.2204, 1.1454, 0.9784, 1.0654, 1.3894, 3.1224, 0.8464, 1.2314, 1.3804,
AT3G07550			RNI-like superfamily protein;(source:Araport11)	501683127,501683127,5891,5891,501711865	11019805,11019805,11077244,11077244,14985976	0.0828148	0.616867	-0.3145, 0.3655, -0.8345, -0.0845, 0.9655, -0.2745, -0.3345, 0.4955, 0.2255, 0.9155, 0.1455, -0.0245, -0.2945, 0.0555, -0.3345, 0.4155, -0.3145, -0.3445, 0.3755, -0.2345, -0.6545, 0.2955, -0.4945, -1.1945, -0.3745, 0.2555, -0.7345, 0.1355, -0.3845, 0.5755, 2.2455, -0.1045, 0.6755, 0.6155, -0.00175, 0.06825, -0.33175, -0.25175, 0.01825, -0.64175, 0.06825, 0.03825, -0.08175, -0.77175, 0.34825, 0.20…	0.196556	0.0643354	0.129, 0.187, 0.241, 0.185, 0.191, 0.171, 0.199, 0.223, 0.233, 0.238, 0.238, 0.265, 0.202, 0.228, 0.176, 0.173, 0.233, 0.224, 0.124, 0.192, 0.29, 0.209, 0.311, 0.382, 0.166, 0.22, 0.08, 0.236, 0.276, 0.27, 0.375, 0.181, 0.201, 0.278, 0.137, 0.144, 0.125, 0.2, 0.246, 0.16, 0.187, 0.156, 0.119, 0.165, 0.113, 0.106, 0.211, 0.192, 0.096, 0.118, 0.148, 0.215, 0.114, 0.135,	1.25802	0.952589	0.202375, 1.858375, -0.283625, 2.094375, 1.359375, 1.154375, 1.415375, 2.205375, 0.527375, 1.937375, 1.481375, 0.630375, 1.295375, 2.780375, -0.161625, 1.620375, -0.077625, -1.381625, 2.162375, 1.245375, 0.400375, 2.218375, -0.522625, -1.240625, 0.460375, 2.376375, 2.088375, 1.719375, -0.391625, 1.445375, 2.741375, 1.762375, 1.866375, 1.642375, 1.696075, 1.626075, 1.953075, 2.055075, 0.164075, 0.…
AT3G07870	F-BOX PROTEIN92 FBX92	F-BOX PROTEIN92 FBX92	FBX92 is an F-box containing protein. Overexpression produces plants with smaller leaves while reduced expression is correlated with increased leaf size and increased rates of cell proliferation.	501727266,501774768	18650403,28340173	0.21175	0.400795	-0.15925, -0.61925, 0.20075, -0.43925, -0.65925, -0.14925, -0.08925, -0.25925, 0.06075, 0.21075, 0.94075, 0.51075, 0.57075, 0.39075, 0.62075, 0.70075, 0.62075, 0.56075, 0.08075, 0.42075, 0.03075, 0.44075, -0.01925, 0.18075, 0.30075, 0.10075, 0.61075, 0.18075, 0.23075, 0.78075,	0.1587	0.0486679	0.287, 0.115, 0.193, 0.162, 0.124, 0.115, 0.236, 0.13, 0.191, 0.156, 0.134, 0.217, 0.093, 0.104, 0.142, 0.149, 0.136, 0.195, 0.154, 0.098, 0.283, 0.135, 0.144, 0.135, 0.157, 0.144, 0.169, 0.108, 0.161, 0.194,	1.10347	0.742342	1.987775, 0.428775, 0.806775, 1.160775, 0.695775, 1.579775, -0.891225, 0.965775, 1.288775, 1.588775, 1.860775, 0.530775, 1.620775, 1.781775, 0.771775, 2.066775, 2.371775, 1.419775, 1.486775, 1.821775, 1.664775, 1.245775, 1.377775, 0.872775, 0.146775, 1.484775, 0.640775, 0.246775, 0.369775, -0.290225,
AT3G08750			F-box and associated interaction domains-containing protein;(source:Araport11)	501718806,501727972	16510518,	0.61025	0.612629	0.75225, -0.25775, 0.60225, 0.26225, -0.59775, 0.42225, 0.15225, 0.81225, 0.25225, 0.24225, 0.59225, 0.21225, 0.70225, 0.85225, 0.52225, 0.94225, 1.33225, 0.99225, 0.75225, -0.05775, 0.76225, 0.02225, 0.78225, -0.05775, -0.19775, 0.95225, 0.66225, 0.76225, 1.15225, 1.17225, 2.93225, 1.48225, 1.56225, 0.16225, 0.72225, -0.01775, 0.28225, 0.92225, 0.24225, 0.62225,	0.200375	0.082531	0.212, 0.208, 0.1, 0.212, 0.187, 0.208, 0.069, 0.147, 0.085, 0.19, 0.128, 0.154, 0.196, 0.177, 0.133, 0.09, 0.265, 0.087, 0.217, 0.056, 0.189, 0.391, 0.296, 0.177, 0.271, 0.382, 0.345, 0.287, 0.294, 0.175, 0.173, 0.132, 0.335, 0.302, 0.202, 0.221, 0.179, 0.176, 0.203, 0.164,	0.5892	1.23317	1.298475, 1.211475, 1.069475, 2.812475, 1.325475, -0.283525, 1.890475, 1.720475, 0.995475, 0.842475, 2.670475, 0.763475, 1.731475, 0.438475, 1.517475, 1.193475, -0.788525, 2.068475, 2.000475, 0.436475, -0.298525, -0.212525, 0.082475, -0.545525, -2.924525, 1.104475, -0.137525, -2.594525, -0.096525, -0.213525, 2.222475, 1.357475, 1.094475, -0.113525, 0.295475, -0.804525, 0.317475, -0.048525, 0.8994…
AT3G11840	PLANT U-BOX 24 PUB24	PLANT U-BOX 24 PUB24	Encodes a U-box-domain-containing E3 ubiquitin ligase that acts as a negative regulator of PAMP-triggered immunity.	501720096,501722879,501722879,501727266,501727236,501728818,501752644,501760731,501781183,501734595	17041029,17722694,17722694,18650403,18664614,18771922,23170036,24998294,30185618,	0.06525	0.551311	0.0765, 0.1865, -0.2135, 0.0765, -0.7435, -0.5135, -0.0935, 0.3165, -0.1635, -0.8235, -0.2535, 2.6065, 0.1565, 0.4365, 0.1365, -0.4035, -0.2035, -0.3135, -0.7335, 0.0065, -0.4435, 0.4865, 0.8165, 0.6565, 0.4265, 0.5065, 0.3065, 0.5365, 0.19, -0.3, -0.11, -0.02, 0.36, -0.35, 0.11, -0.35, -0.04, -0.13, 1.18, 0.15, -0.14, 0.27, 0.04, -0.15, -0.48, -0.31, 0.26, 0.12,	0.162854	0.0498466	0.16, 0.16, 0.12, 0.11, 0.16, 0.16, 0.14, 0.19, 0.2, 0.26, 0.16, 0.34, 0.24, 0.16, 0.1, 0.1, 0.19, 0.09, 0.15, 0.2, 0.18, 0.09, 0.23, 0.13, 0.19, 0.09, 0.13, 0.16, 0.118, 0.212, 0.206, 0.155, 0.189, 0.127, 0.176, 0.142, 0.117, 0.219, 0.117, 0.179, 0.153, 0.156, 0.1, 0.181, 0.245, 0.147, 0.154, 0.134,	0.670533	1.18129	0.3137, 0.8377, 1.2607, 1.2857, -1.4863, 2.0117, 1.8887, 0.1477, 1.6737, 0.6157, 0.8787, 3.1677, 0.4757, 1.3537, 1.9037, 1.9837, -0.6463, 0.1917, 0.8107, 0.5677, 0.2467, 1.6407, 2.4457, 2.4867, 1.6277, 0.7037, 2.8987, 1.2727, 0.76285, 0.22085, -1.18815, -0.62015, -0.83315, -0.17615, -0.29715, 0.36385, 0.38285, 0.33485, 2.00985, 0.09685, -0.77715, -2.28515, 1.30585, 0.00185, -1.62915, 0.15285, 1.4…
AT3G12350			F-box family protein;(source:Araport11)	501720443,501728802	17085508,18775970	-0.343394	0.687254	0.016666667, 0.306666667, -0.823333333, -0.433333333, -0.223333333, -0.903333333, -0.773333333, -1.203333333, -0.063333333, -0.013333333, 0.376666667, -0.323333333, 0.126666667, -0.413333333, -0.553333333, -1.853333333, -0.473333333, -0.813333333, -0.203333333, 0.566666667, -0.893333333, -0.713333333, -0.863333333, -0.963333333, -0.603333333, -0.803333333, -0.473333333, -1.213333333, -1.443333333…	0.151769	0.058293	0.204, 0.189, 0.16, 0.078, 0.132, 0.108, 0.105, 0.104, 0.057, 0.113, 0.166, 0.126, 0.216, 0.15, 0.133, 0.168, 0.12, 0.101, 0.131, 0.137, 0.128, 0.118, 0.198, 0.116, 0.167, 0.092, 0.247, 0.078, 0.112, 0.332, 0.223, 0.26, 0.244, 0.188, 0.144, 0.111, 0.216, 0.144, 0.103,	2.01466	0.805423	1.501277778, 3.298277778, 1.654277778, 2.278277778, 2.308277778, 1.300277778, 1.489277778, 2.354277778, 2.530277778, 2.384277778, 2.719277778, 2.166277778, 1.639277778, 1.367277778, 2.659277778, 1.318277778, 1.657277778, 2.459277778, 2.641277778, 1.899277778, 1.726277778, 1.929277778, 1.893277778, 2.266277778, 1.785277778, 2.599277778, -1.116722222, 1.901277778, 0.814277778, 2.268473684, 3.498473…
AT3G16740	FOA2	FOA2	F-box and associated interaction domains-containing protein;(source:Araport11)	501681836,501682584,501771510	12169662,12407186,27612866	0.374219	0.377671	1.131875, -0.118125, 0.1875, 0.9675, -0.0625, 0.4975, 0.9675, 0.0475, 0.7075, 0.4075, -0.0425, 1.2575, 0.3375, 0.2875, 0.6775, 0.6275, 0.4875, 0.9475, 0.3675, 1.0875, 0.0075, 0.0575, -0.0125, 0.1275, -0.1425, 0.2575, -0.0625, -0.0925, 0.2775, 0.2375, 0.4575, 0.4175, 0.0275, 0.4275, 0.6875, 0.5075, 0.2375, 0.5675, 0.1575, 0.0575,	0.157125	0.0584927	0.186, 0.245, 0.129, 0.164, 0.171, 0.13, 0.076, 0.124, 0.183, 0.144, 0.108, 0.093, 0.149, 0.175, 0.108, 0.253, 0.204, 0.177, 0.19, 0.392, 0.163, 0.115, 0.191, 0.079, 0.142, 0.105, 0.116, 0.23, 0.136, 0.101, 0.157, 0.161, 0.236, 0.12, 0.098, 0.125, 0.191, 0.125, 0.14, 0.153,	0.254038	1.25564	1.1663125, -0.1836875, -0.65795, 0.72605, -1.98495, 0.71305, 1.53605, 0.31505, 0.76105, 0.36905, 0.50505, 1.84905, -2.10995, -1.67595, 0.83205, -2.55795, 0.68705, 0.03105, -0.18195, 0.30705, 0.16905, 1.45105, 0.86605, 1.28905, -0.36695, 0.63705, 1.71205, -3.05195, 0.57105, 1.73805, -1.13395, 1.09805, -1.72095, 1.27205, 1.15405, 0.84405, -0.64295, 1.21305, 0.98005, 1.63805,
AT3G17710			F-box and associated interaction domains-containing protein;(source:Araport11)	501728802	18775970	-0.036	0.470077	-0.452, 0.348, -0.442, -0.172, -0.202, 0.128, -0.812, -0.332, -0.142, 0.438, 0.028, 0.278, 0.418, 1.388, -0.152, -0.032, -0.522, -0.372, -0.142, 0.028,	0.1831	0.0620619	0.192, 0.202, 0.129, 0.13, 0.164, 0.16, 0.34, 0.205, 0.305, 0.151, 0.171, 0.183, 0.172, 0.155, 0.116, 0.259, 0.23, 0.184, 0.105, 0.109,	0.5417	1.03373	-0.07765, 0.23235, 1.12235, 0.65135, 0.04235, 0.84135, -1.34365, -0.12365, 0.20335, 1.12835, 1.96935, 1.41635, 0.11335, 0.27135, 0.72235, -0.05065, -0.91465, -0.25265, 1.64535, 3.23735,
AT3G18710	PLANT U-BOX 29 PUB29	PLANT U-BOX 29 PUB29;ARABIDOPSIS THALIANA PLANT U-BOX 29 ATPUB29	Encodes a protein containing a U-box and an ARM domain. This protein has E3 ubiquitin ligase activity based on in vitro assays.	501710652,501711683,501722879,501722879,501725140,501727236	12946625,14657406,17722694,17722694,18552232,18664614	-0.113	0.248818	0.1365, 0.4065, 0.3065, -0.4335, -0.6435, 0.0565, 0.0865, -0.3335, -0.1635, -0.1335, -0.0935, -0.3835, -0.1635, -0.1535, -0.1935, -0.0035, -0.3135, -0.0735, -0.1935, 0.0265,	0.148	0.051565	0.07, 0.15, 0.26, 0.13, 0.22, 0.12, 0.24, 0.15, 0.13, 0.22, 0.13, 0.09, 0.11, 0.12, 0.15, 0.16, 0.08, 0.16, 0.15, 0.12,	1.7071	1.03571	1.7397, 2.5787, 1.9647, 1.4607, -1.9183, 1.8267, 1.9357, 1.3507, 2.9157, 1.4777, 1.3497, 2.6307, 1.5917, 2.2277, 2.4127, 0.5847, 2.6697, 1.1427, 1.9187, 2.2817,
AT3G18910	EIN2 TARGETING PROTEIN2 ETP2	EIN2 TARGETING PROTEIN2 ETP2	EIN2 targeting protein2;(source:Araport11)	501733054	19196655	0.854016	0.855194	-0.375, 1.495, 0.345, 1.975, 0.935, 0.915, -0.135, 0.495, 0.975, 0.295, 0.485, 0.745, 3.365, 0.445, -0.355, 1.005, 1.315, 0.165, 0.355, 1.115, 1.180789474, 2.250789474, 0.650789474,	0.192739	0.0637996	0.14, 0.143, 0.24, 0.206, 0.169, 0.261, 0.208, 0.148, 0.316, 0.21, 0.145, 0.239, 0.324, 0.193, 0.253, 0.162, 0.167, 0.198, 0.123, 0.168, 0.24, 0.13, 0.05,	1.78783	1.05013	1.1113, 3.0243, 1.2893, 1.6683, 1.2793, 0.0123, 1.5703, 2.0973, -0.4347, 0.4083, 1.9313, 1.3283, 4.5213, 2.2343, 2.1373, 2.2733, 1.7793, 1.6273, 1.9033, 3.0923, 2.468684211, 1.148684211, 2.648684211,
AT3G18980	EIN2 TARGETING PROTEIN1 ETP1	EIN2 TARGETING PROTEIN1 ETP1	EIN2 targeting protein1;(source:Araport11)	501733054	19196655	-0.05468	0.411638	0.1395, -0.2005, 0.6595, -0.3205, 0.2095, 0.0295, 0.2695, 0.7695, 0.3695, 0.0595, 0.2795, -0.1205, -0.4505, -0.0505, -0.0305, 0.0795, 0.2695, 0.4795, 0.4195, 0.1795, -0.3205, -0.0305, -0.5205, 0.2395, -0.8305, 0.2295, 0.3695, 0.3295, -0.2405, -0.0705, 0.3095, -0.2805, 0.0095, -0.0705, -0.1805, 0.3695, 0.4095, -0.0905, 0.1695, -0.0405, 0.1195, -0.0905, 0.3195, 0.1195, -0.1105, -0.0105, 0.6795, 0.0…	0.150033	0.0463421	0.13, 0.12, 0.1, 0.13, 0.14, 0.14, 0.13, 0.11, 0.14, 0.14, 0.13, 0.15, 0.16, 0.18, 0.13, 0.13, 0.13, 0.09, 0.14, 0.11, 0.13, 0.15, 0.1, 0.1, 0.27, 0.11, 0.17, 0.11, 0.17, 0.2, 0.11, 0.08, 0.11, 0.12, 0.07, 0.19, 0.15, 0.11, 0.1, 0.1, 0.186, 0.169, 0.11, 0.156, 0.207, 0.19, 0.192, 0.255, 0.281, 0.224, 0.141, 0.175, 0.175, 0.176, 0.198, 0.101, 0.197, 0.223, 0.217, 0.149,	0.584638	1.12024	1.002, 0.702, 1.122, 0.272, 0.582, 0.832, 1.542, 2.132, 1.092, 1.532, 1.722, 1.382, -1.258, -0.118, -0.218, -0.678, 0.912, 0.162, 0.652, 0.382, -0.588, 0.332, 0.202, 1.922, -2.018, 2.112, 2.532, 2.562, 2.172, 0.672, 1.392, 0.992, 0.682, 0.902, 1.432, 2.342, 0.132, -0.688, 0.642, 0.672, 0.302, 1.602, 0.762, -0.218, 0.082, 1.382, 1.562, -0.858, -1.638, 0.932, -0.768, 2.462, 0.072, -0.398, 0.182, -0…
AT3G19380	PLANT U-BOX 25 PUB25	PLANT U-BOX 25 PUB25	PUB25 and PUB26 are closely related paralogs that encode functional E3 ligases. They function in immune response pathway by targeting BIK1 for degradation.	501710652,501722879,501722879,501723106,501727236,501778533,501737483	12946625,17722694,17722694,17885809,18664614,29358080,	-0.05075	0.462144	0.9865, -0.0035, 0.1965, 0.0265, -0.2635, 0.5965, 0.0765, -0.9535, -0.3835, -0.3435, 0.5765, 0.6765, 0.2965, 0.2865, -0.1935, 0.9765, -0.8335, 0.1365, 0.5365, 0.4665, -0.084, -0.024, -0.244, -0.534, -0.414, -0.404, -0.494, -0.094, -0.684, 0.096, -0.094, 0.276, -0.274, -0.454, -0.064, -0.364, 0.016, -0.214, -0.824, -0.014,	0.161026	0.0493001	0.2, 0.22, 0.13, 0.21, 0.19, 0.1, 0.13, 0.13, 0.14, 0.18, 0.17, 0.13, 0.25, 0.23, 0.29, 0.13, 0.13, 0.25, 0.16, 0.13, 0.15, 0.21, 0.16, 0.13, 0.25, 0.13, 0.12, 0.11, 0.23, 0.1, 0.15, 0.13, 0.13, 0.13, 0.13, 0.13, 0.12, 0.17, 0.1,	0.528825	1.00892	1.1177, -1.7883, -0.1063, -0.7673, 0.7387, 1.8267, 1.6927, -0.1293, 1.5277, 1.1207, 1.3527, 0.7937, 1.2177, 1.2747, -0.6443, 0.4267, -1.3783, 0.9097, 0.1347, 0.9427, 1.1535, 3.1135, 0.3835, 0.2635, -0.5165, -0.1765, 0.3535, 1.3835, 0.7535, 0.3635, 2.3635, 0.8935, -0.8865, -0.6665, 0.6135, 0.4435, 0.7135, 0.6835, -1.2165, 0.8735,
AT3G21410			F-box and associated interaction domains-containing protein;(source:Araport11)	501683127,501683127,5891,5891,501727972	11019805,11019805,11077244,11077244,	0.2785	0.516485	0.872, -0.168, -0.228, -0.368, -0.388, -0.628, -0.028, 0.542, -0.178, 0.272, -0.128, 0.722, -0.148, -0.338, 0.182, 0.032, 0.892, 0.042, -0.238, 0.672, 1.072, 1.062, 0.462, 0.582, 0.562, -0.198, 0.772, 1.102, 0.912, 1.302, 0.682, 0.562, 0.192, 0.242, 0.562, -0.348, -0.398, -0.188, 0.082, 0.732,	0.153675	0.0471885	0.12, 0.11, 0.17, 0.15, 0.14, 0.15, 0.12, 0.1, 0.16, 0.12, 0.14, 0.17, 0.12, 0.16, 0.09, 0.14, 0.13, 0.13, 0.11, 0.09, 0.11, 0.13, 0.13, 0.13, 0.18, 0.13, 0.22, 0.19, 0.2, 0.12, 0.13, 0.14, 0.15, 0.09, 0.22, 0.14, 0.11, 0.21, 0.09, 0.18, 0.209, 0.264, 0.211, 0.185, 0.178, 0.151, 0.09, 0.189, 0.127, 0.285, 0.086, 0.162, 0.126, 0.14, 0.096, 0.093, 0.255, 0.2, 0.108, 0.206, 0.121, 0.253, 0.178, 0.23…	1.60915	0.828136	2.3379, 0.9609, 0.8879, 2.8849, 2.7209, 1.9949, 2.3909, 2.3189, 1.7259, 2.4459, 1.1879, 2.0939, 2.3179, 1.3419, 2.5509, 1.6269, 2.5879, 1.3399, 1.1859, 2.6709, 1.9369, 0.8379, 1.5649, 1.2189, 1.5139, 1.0429, 1.4989, 1.6059, 2.1659, 2.7039, 1.8989, -0.2341, 0.5249, 1.0239, 1.1619, -0.9451, 2.1689, 0.4679, 1.3799, 1.2559,
AT3G22350			F-box and associated interaction domains-containing protein;(source:Araport11)	501727972	0	0.24625	0.493532	0.28575, 0.03575, 0.35575, 0.06575, 0.09575, -0.37425, -0.83425, 0.49575, -0.39425, -0.30425, -0.13425, 0.38575, 0.13575, 0.69575, 0.21575, 0.91575, 0.90575, 0.65575, 0.88575, 0.83575,	0.15775	0.0481291	0.146, 0.101, 0.175, 0.152, 0.172, 0.237, 0.155, 0.254, 0.091, 0.126, 0.197, 0.242, 0.165, 0.108, 0.183, 0.119, 0.1, 0.178, 0.118, 0.136,	0.48515	1.24642	-0.8304, 0.6646, 0.2356, 1.9836, 1.4936, -2.9114, 0.5746, -0.7414, 1.4746, -1.0694, 2.2916, -0.6214, 1.2006, 0.5486, 1.6436, 1.1886, 1.1786, 0.2116, 0.0616, 1.1256,
AT3G23880			F-box and associated interaction domains-containing protein;(source:Araport11)	501711432,501713039,501714599,501716537,501720811,501724035,501727266	14617066,15310832,15659098,15937229,17217462,18305208,18650403	0.1395	0.365216	0.53575, -0.21425, 0.60575, 0.47575, 0.34575, -0.41425, 0.20575, 0.00575, 0.16575, 0.32575, 0.35575, 0.02575, -0.11425, 0.21575, 0.20575, -0.18425, -0.57425, -0.30425, 0.10575, 0.24575, -0.33425, 0.07575, -0.47425, -0.22425, 0.10575, -0.02425, -0.11425, -0.03425, -0.29425, 0.66575, -0.01425, 0.49575, 0.28575, 0.70575, 0.81575, -0.30425, 0.61575, 0.59575, 0.36575, 0.65575,	0.12995	0.0289402	0.137, 0.147, 0.127, 0.155, 0.098, 0.128, 0.098, 0.118, 0.118, 0.11, 0.1, 0.143, 0.116, 0.09, 0.139, 0.106, 0.096, 0.191, 0.171, 0.146, 0.154, 0.101, 0.115, 0.172, 0.118, 0.185, 0.142, 0.145, 0.082, 0.173, 0.125, 0.103, 0.165, 0.121, 0.163, 0.076, 0.105, 0.138, 0.157, 0.124,	1.15058	0.822546	0.7986, 1.7466, 0.9616, 1.2106, 1.9446, 1.9406, 1.5756, 1.0816, 1.5006, 0.8216, 0.6626, 0.2076, 0.0276, 1.4796, 1.1826, 1.3506, 0.0816, -0.3784, 1.5596, 2.2526, 1.3586, 1.8436, 1.8806, -0.7054, 0.8566, 1.9566, 2.1946, 1.5916, 0.9466, 2.7316, -0.1384, 0.3236, 0.0706, 1.8426, 0.2136, 1.5326, 0.6916, 0.6326, 1.6186, 2.5726,
AT3G24760			Galactose oxidase/kelch repeat superfamily protein;(source:Araport11)	501728802	18775970	0.216199	0.389562	0.929333333, 0.599333333, 0.579333333, 0.659333333, 0.859333333, 1.139333333, 0.319333333, 0.129333333, 0.969333333, 0.019333333, 0.439333333, 0.269333333, 0.229333333, -0.100666667, -0.120666667, 0.259333333, 1.349333333, 0.4115, 0.3915, 0.6515, -0.1585, 0.0015, -0.2885, -0.0185, 0.4415, -0.3485, -0.5685, 0.3915, 0.0015, 0.4815, -0.1285, 0.3115, 0.3815, -0.0985, -0.3785, 0.2815, -0.1785, -0.2185…	0.140482	0.0463293	0.185, 0.099, 0.121, 0.112, 0.143, 0.106, 0.083, 0.143, 0.155, 0.168, 0.097, 0.182, 0.127, 0.198, 0.368, 0.132, 0.183, 0.155, 0.169, 0.158, 0.198, 0.147, 0.135, 0.136, 0.103, 0.185, 0.14, 0.1, 0.094, 0.121, 0.103, 0.084, 0.191, 0.162, 0.184, 0.197, 0.12, 0.109, 0.117, 0.123, 0.11, 0.115, 0.151, 0.21, 0.114, 0.095, 0.114, 0.163, 0.113, 0.09, 0.102, 0.113, 0.136, 0.132, 0.096, 0.18,	1.42629	1.18583	0.647066667, 1.260066667, -0.728933333, 1.927066667, 1.222066667, 1.277066667, 0.992066667, 1.040066667, 2.554066667, 1.719066667, 1.815066667, 0.976066667, 0.847066667, -0.853933333, -1.739933333, -1.350933333, -0.642933333, 3.4071, 1.4041, 3.3201, -0.4889, 0.9661, 1.0181, 2.5081, 2.6671, 0.3261, 1.1251, 3.3211, 2.0811, 2.5341, 1.1541, 2.2831, 1.6051, 2.1091, 0.4511, 0.7021, 1.8831, 1.7361, 2.88…
AT3G26000	RCAR3 INTERACTING F-BOX PROTEIN 1 RIFP1	RCAR3 INTERACTING F-BOX PROTEIN 1 RIFP1	RIPF1 is an F-Box E3 ligase that interacts with the ABA receptor RCAR3 and appears to be responsible for facilitating its turnover.	1546190,501707007,501713164,501728802,501766344	11752382,12795696,15377757,18775970,26386272	0.140255	0.409018	0.895384615, 0.155384615, -0.094615385, -0.014615385, -0.024615385, 0.265384615, 0.255384615, 0.295384615, 0.075384615, -0.364615385, 1.035384615, 1.125384615, 0.625384615, 0.115384615, 0.275384615, 0.015384615, -0.094615385, 0.215384615, 0.595384615, 0.055384615, -0.214615385, -0.284615385, -0.114615385, -0.074615385, -0.224615385, -0.364615385, 0.095384615, 0.045384615, 0.065384615, 0.255384615…	0.255923	0.0757754	0.116, 0.27, 0.319, 0.269, 0.355, 0.392, 0.272, 0.312, 0.279, 0.112, 0.212, 0.277, 0.314, 0.27, 0.252, 0.197, 0.229, 0.334, 0.351, 0.159, 0.092, 0.211, 0.234, 0.302, 0.175, 0.272, 0.223, 0.292, 0.247, 0.194, 0.339, 0.156, 0.394, 0.219, 0.36, 0.237, 0.246, 0.33, 0.167,	0.283462	2.94748	0.204666667, 1.103666667, -0.205333333, 0.319666667, 0.868666667, 0.092666667, -1.170333333, 0.243666667, -0.708333333, 0.711666667, 1.500666667, 0.936666667, 1.293666667, -0.537333333, 1.021666667, 1.673666667, 1.011666667, -3.311333333, -2.399333333, -0.672333333, 0.680666667, 0.790666667, 0.399666667, -0.339333333, -0.294333333, -1.914333333, 3.057666667, -2.184333333, -0.750333333, 0.06566666…
AT3G26920			FBD / Leucine Rich Repeat domains containing protein;(source:Araport11)			-0.0131416	0.453618	0.613846154, 0.263846154, -0.306153846, 0.333846154, 0.683846154, -0.016153846, 0.473846154, 0.193846154, 0.183846154, -0.006153846, 0.433846154, 0.223846154, 0.053846154, -0.126153846, 0.263846154, 0.873846154, -0.266153846, -0.836153846, -0.296153846, 0.213846154, -0.242631579, 0.087368421, -0.292631579, -0.382631579, -0.482631579, -0.532631579, 0.437368421, -0.392631579, 0.067368421, -0.442631…	0.191125	0.0583962	0.131, 0.143, 0.176, 0.171, 0.209, 0.109, 0.199, 0.216, 0.208, 0.152, 0.194, 0.119, 0.137, 0.111, 0.231, 0.136, 0.118, 0.113, 0.128, 0.204, 0.221, 0.26, 0.288, 0.212, 0.176, 0.171, 0.175, 0.262, 0.226, 0.353, 0.219, 0.185, 0.186, 0.223, 0.196, 0.123, 0.208, 0.297, 0.308, 0.151,	1.45711	1.50534	3.011846154, 3.510846154, 0.944846154, 1.726846154, 2.077846154, 3.322846154, 2.391846154, 1.312846154, 2.263846154, 2.953846154, 2.821846154, 2.375846154, 1.534846154, 2.424846154, 2.871846154, 3.953846154, 1.488846154, 1.504846154, 1.197846154, 2.152846154, -0.477421053, 0.256578947, -0.804421053, 1.473578947, 0.429578947, 0.794578947, 1.415578947, 5.740578947, 2.517578947, 0.652578947, -0.0054…
AT3G27150			Target gene of MIR2111-5p.	501730344,501734980,501741056	19465578,19854858,21119043	0.192633	0.444616	0.625384615, 0.235384615, 0.335384615, -0.014615385, 0.165384615, -0.084615385, -0.114615385, 0.055384615, -0.334615385, 0.035384615, 0.635384615, 0.445384615, 0.205384615, 0.015384615, -0.234615385, -0.334615385, -0.244615385, 1.245384615, -0.064615385, 0.045384615, 0.295384615, 0.455384615, 0.355384615, 0.205384615, 0.885384615, 0.535384615, 0.435384615, 0.325384615, -0.084615385, 0.155384615, …	0.258575	0.0654683	0.178, 0.141, 0.235, 0.305, 0.274, 0.172, 0.264, 0.262, 0.267, 0.234, 0.228, 0.36, 0.241, 0.179, 0.316, 0.192, 0.177, 0.329, 0.257, 0.296, 0.269, 0.234, 0.209, 0.291, 0.2, 0.223, 0.295, 0.193, 0.306, 0.359, 0.304, 0.318, 0.374, 0.219, 0.253, 0.39, 0.344, 0.17, 0.151, 0.334,	0.892567	1.42944	3.669666667, 2.386666667, 0.017666667, 2.748666667, -0.154333333, 1.569666667, 0.195666667, 1.712666667, 2.250666667, 1.211666667, 0.961666667, 2.762666667, 3.631666667, 1.683666667, 0.783666667, 2.635666667, 1.636666667, 2.039666667, 0.976666667, 2.695666667, 0.861666667, -0.607333333, -0.334333333, -0.490333333, 0.517666667, -0.723333333, 1.789666667, 2.246666667, -1.189333333, 0.136666667, -1.…
AT3G46510	PLANT U-BOX 13 PUB13	ARABIDOPSIS THALIANA PLANT U-BOX 13 ATPUB13;PLANT U-BOX 13 PUB13	Encodes a protein containing a UND, a U-box, and an ARM domain. This protein has E3 ubiquitin ligase activity based on in vitro assays. Can be phosphorylated in vitro by MLPK, ARK1, and ARK2 but not by SD1-29. Involved in ubiquitination of pattern recognition receptor FLS2.	501710652,501711683,501725140,501743115,501748147,501750218,501750321,501762666,501763180,501763883,501765557,501766709,501773062,501774403,501777874,501778796	12946625,14657406,18552232,21680842,22383540,22659522,22827949,25634989,25658451,25873653,26163577,26482222,26511514,28195333,29182677,29432171	0.318188	0.849769	0.796, 3.216, 0.776, 1.026, 0.356, 0.726, 0.456, -0.774, -0.154, -0.604, 0.586, 0.666, -0.404, 0.436, -0.214, 0.656, 0.366, -0.254, 0.306, 0.046, 0.076, -0.434, 0.426, -0.284, -0.374, -0.424, -0.024, 0.116, 0.296, 0.416, -0.444, 2.826,	0.152813	0.052501	0.13, 0.28, 0.23, 0.16, 0.12, 0.14, 0.1, 0.23, 0.2, 0.11, 0.05, 0.12, 0.22, 0.1, 0.13, 0.06, 0.14, 0.13, 0.12, 0.11, 0.2, 0.22, 0.2, 0.18, 0.11, 0.14, 0.18, 0.13, 0.12, 0.18, 0.2, 0.15,	0.503187	1.08778	1.7735, 3.3935, 0.5535, 0.4835, 0.1835, 1.0435, 1.0835, -1.0665, -0.4165, -0.9965, 1.9435, 0.5035, -0.0065, 1.0235, 0.2235, 2.0535, 1.5935, 1.4735, 1.5435, 0.3635, 0.6835, 0.1335, -0.2265, 0.3535, 0.0435, -0.9765, -0.3465, 0.7635, 0.2335, 1.4035, -1.7965, -0.9165,
AT3G47820	PLANT U-BOX 39 PUB39	PLANT U-BOX 39 PUB39	PLANT U-BOX 39;(source:Araport11)	501710652,501712942,501766236	12946625,15231834,27247031	0.151129	0.395534	0.918974, 0.188974, -0.17103, -0.24103, -0.32103, -0.56103, 0.538974, 0.158974, 0.098974, 0.248974, -0.10103, 0.058974, 0.678974, 0.088974, 0.318974, 0.308974, 0.398974, -0.26103, 0.628974, 0.848974, 0.1755, -0.2645, -0.2645,	0.176913	0.0533606	0.196, 0.13, 0.211, 0.125, 0.107, 0.294, 0.185, 0.154, 0.304, 0.244, 0.162, 0.158, 0.227, 0.168, 0.195, 0.176, 0.171, 0.166, 0.151, 0.176, 0.143, 0.076, 0.15,	0.897228	1.13214	0.435103, 1.044103, -1.4609, 1.343103, 0.951103, -0.0599, 2.683103, 2.639103, -1.7329, 1.755103, 1.547103, -0.0179, 0.841103, 1.115103, 1.087103, 1.148103, 0.697103, 0.465103, 1.756103, 0.298103, -0.0656, 1.4014, 2.7664,
AT3G49060	PUB32	PUB32	U-box domain-containing protein kinase family protein;(source:Araport11)	501683545,501720929,501742526	12644671,17317660,21477822	0.250473	0.389553	0.738974, 0.138974, -0.45103, 0.538974, -0.19103, 0.478974, 0.518974, 0.058974, 0.688974, -0.34103, 0.718974, 0.598974, 0.008974, 0.038974, 0.598974, -0.35103, -0.01103, 0.638974, 0.228974, 0.358974,	0.15835	0.0294605	0.22, 0.186, 0.14, 0.142, 0.178, 0.155, 0.182, 0.16, 0.111, 0.123, 0.173, 0.189, 0.148, 0.162, 0.187, 0.125, 0.112, 0.159, 0.13, 0.185,	1.04525	1.05663	-0.3529, -1.3319, 0.903103, 0.185103, 0.055103, -0.1199, 0.910103, 1.257103, 0.769103, 1.764103, 2.377103, 2.536103, 1.372103, 0.984103, 1.830103, 0.373103, 0.801103, 2.842103, 1.955103, 1.795103,
AT3G49480			F-box/FBD/LRR protein;(source:Araport11)	501739720	20736450	-0.096019	0.538713	-0.102105263, 0.137894737, -0.472105263, 0.447894737, -0.992105263, -0.222105263, -0.702105263, 0.364117647, -0.595882353, -0.065882353, -0.525882353, -0.325882353, -0.265882353, -0.485882353, 0.264117647, 1.004117647, 0.584117647, 0.874117647, -0.085882353, -0.275882353, -0.625882353, -0.545882353, -0.065882353, -0.775882353, 0.084117647, 0.874117647,	0.184769	0.0787473	0.114, 0.063, 0.128, 0.116, 0.137, 0.102, 0.232, 0.204, 0.291, 0.241, 0.399, 0.243, 0.236, 0.171, 0.218, 0.182, 0.237, 0.304, 0.267, 0.141, 0.167, 0.11, 0.164, 0.114, 0.12, 0.103,	1.36218	0.693444	1.725789474, 2.813789474, 1.687789474, 2.644789474, 1.962789474, 1.851789474, 1.533789474, 0.239058824, 0.955058824, 1.151058824, 0.110058824, 0.464058824, 0.989058824, 2.248058824, 1.574058824, 1.433058824, 1.856058824, 0.996058824, 1.254058824, 0.777058824, 1.004058824, 1.014058824, 1.728058824, 0.425058824, 2.016058824, 0.962058824,
AT3G49810	U-BOX PROTEIN 30 ATPUB30	U-BOX PROTEIN 30 ATPUB30	Encodes a protein with E3 ubiquitin ligase activity that is involved in negative regulation of salt stress tolerance during germination.	501710652,501727236,501761985,501776707	12946625,18664614,25410251,28865087	0.0968333	0.605579	0.2365, 0.1065, -0.2035, -0.4835, -0.7335, -0.0535, -0.1835, -0.1035, -0.0435, -0.3435, 0.0965, 0.0365, 0.0065, 1.0265, 0.0165, -0.5535, -0.2635, 0.0365, -0.1735, -0.3035, 0.1135, 1.0035, -0.8465, 0.8335, 1.1635, 0.0835, 1.4335, 0.2935, 0.0435, 1.4635, 0.9135, 0.0535, -0.7565, -0.3065, 0.1935, 1.0135, -0.9365, -0.3365, 0.2335,	0.144103	0.0444687	0.12, 0.16, 0.15, 0.12, 0.16, 0.11, 0.1, 0.12, 0.11, 0.13, 0.11, 0.07, 0.19, 0.21, 0.15, 0.17, 0.08, 0.11, 0.06, 0.14, 0.11, 0.19, 0.23, 0.12, 0.12, 0.11, 0.15, 0.12, 0.12, 0.15, 0.11, 0.2, 0.24, 0.17, 0.19, 0.12, 0.2, 0.17, 0.23,	1.27989	1.12704	1.7997, 1.5437, 1.5827, 2.3167, 1.0397, 1.6477, 1.5577, 2.8157, -0.0453, 0.7627, 1.0407, 2.0397, 1.0357, 1.7037, 1.3887, 1.4637, 1.1237, 0.2277, 2.2107, 2.8017, -1.31375, 1.38625, -0.54375, -0.86375, 2.99625, 2.47625, 2.63625, 1.14625, 0.42625, 0.73625, 3.68625, 1.19625, 0.33625, 0.58625, 0.31625, 3.23625, -0.18375, 0.33625, 1.26625,
AT3G50080	VIER F-BOX PROTEINE 2 VFB2	VIER F-BOX PROTEINE 2 VFB2	Encodes an F-box protein. Based on genetic analysis appears to be functionally redundant with VFB1,3, and 4. When expression of all 4 genes is reduced plants show defects in growth and reduced expression of auxin response genes.	501683127,501683127,5891,5891,501681836,501681836,501710157,501710157,501712682,501721388,501721388,501724643	11019805,11019805,11077244,11077244,12169662,12169662,12912986,12912986,15181213,17435085,17435085,18375657	0.249823	0.526876	-0.475, 0.045, 0.155, -0.245, 0.255, -0.325, -0.135, -0.445, 0.005, -0.155, 0.955, 0.905, 0.215, -0.335, 0.125, 0.625, -0.345, 0.265, 0.735, 0.495, 0.05825, 0.11825, 0.22825, -0.57175, 0.41825, 0.14825, -0.01175, 0.37825, -0.09175, 0.00825, -0.32175, 0.15825, -0.14175, 0.64825, 0.025294118, -0.454705882, 0.905294118, -0.164705882, -0.224705882, 0.085294118, -0.204705882, 0.445294118, 0.075294118,…	0.184731	0.0772003	0.19, 0.118, 0.106, 0.181, 0.157, 0.215, 0.137, 0.079, 0.122, 0.127, 0.26, 0.111, 0.188, 0.153, 0.234, 0.17, 0.213, 0.13, 0.174, 0.274, 0.11, 0.109, 0.114, 0.159, 0.103, 0.084, 0.118, 0.089, 0.125, 0.142, 0.246, 0.084, 0.089, 0.121, 0.308, 0.461, 0.259, 0.283, 0.31, 0.243, 0.289, 0.223, 0.239, 0.276, 0.225, 0.169, 0.23, 0.219, 0.229, 0.267, 0.153, 0.191,	1.56377	0.880107	1.22435, 1.92935, 1.66335, 1.19935, 2.60035, 1.42435, 2.25835, 1.41835, 1.27335, 1.95535, 1.98235, 1.99435, 1.27235, 1.07435, 1.53735, 2.73235, 1.10535, 2.06935, 3.23735, 1.79435, 2.672075, 1.490075, 2.031075, 1.466075, 2.726075, 2.831075, 2.553075, 2.001075, 2.456075, 1.981075, -0.313925, 1.566075, 0.893075, 2.853075, 0.454, -1.201, 0.942, -0.294, 0.915, 1.716, 0.403, 2.697, 1.059, 0.935, 0.947,…
AT3G52450	PLANT U-BOX 22 PUB22	PLANT U-BOX 22 PUB22; ATPUB22	Encodes a cytoplasmically localized U-box domain E3 ubiquitin ligase protein that is involved in the response to water stress and acts as a negative regulator of PAMP-triggered immunity.	501710652,501712936,501720096,501720630,501722650,501722879,501722879,501727236,501728818,501728802,501750315,501752644,501760731,501765494,501773661,501774613,501776631,501781183,501734595	12946625,15235117,17041029,17149585,17665211,17722694,17722694,18664614,18771922,18775970,22829319,23170036,24998294,26188517,27956469,28280093,28837065,30185618,	0.120603	0.720054	-0.0835, -0.0435, -0.6735, -0.0535, -0.2935, -0.2735, 0.0465, -0.2135, -0.2135, 0.1465, 0.9565, 0.0365, -0.1935, 0.2065, 0.3565, 0.1165, 0.8865, 1.6065, 0.1965, -0.644, 0.426, 0.086, -0.354, -0.144, -0.084, -0.044, 0.376, 0.346, 0.416, -0.114, -0.454, -0.084, -0.414, -0.294, -0.124, 0.486, 3.546, -0.044, -0.694,	0.167436	0.0506649	0.1, 0.23, 0.14, 0.15, 0.11, 0.11, 0.19, 0.17, 0.26, 0.15, 0.18, 0.17, 0.14, 0.25, 0.23, 0.25, 0.21, 0.17, 0.24, 0.1, 0.11, 0.15, 0.27, 0.1, 0.1, 0.09, 0.17, 0.17, 0.17, 0.15, 0.24, 0.12, 0.17, 0.19, 0.17, 0.18, 0.18, 0.11, 0.14,	0.892777	0.996799	-1.1003, 1.6987, -0.3633, 1.8557, 0.8387, 0.2837, 0.0297, 1.7697, -0.2763, 0.9887, 1.9727, 1.6607, 0.6617, 1.1397, 1.5177, 1.1267, 2.3057, 2.0047, 1.4237, 0.6235, 1.8835, -0.0565, -0.3165, 0.7335, 0.7835, 0.3935, 0.5235, 0.9635, 1.0935, 0.6735, 0.3835, -0.4265, 1.3035, -0.7565, 0.2035, 0.0635, 3.0435, 0.6535, 3.5135,
AT3G52680			F-box/RNI-like/FBD-like domains-containing protein;(source:Araport11)			0.24911	0.286615	0.383846154, 0.013846154, 0.563846154, -0.276153846, 0.343846154, -0.186153846, 0.053846154, 0.403846154, 0.073846154, 0.123846154, 0.233846154, 0.743846154, 0.483846154, 0.573846154, 0.313846154, 0.543846154, -0.116153846, 0.013846154, 0.443846154,	0.131947	0.0438159	0.076, 0.131, 0.11, 0.167, 0.074, 0.092, 0.063, 0.078, 0.098, 0.184, 0.194, 0.151, 0.173, 0.159, 0.128, 0.2, 0.117, 0.139, 0.173,	1.77111	0.696227	2.844846154, 2.326846154, 1.852846154, 1.187846154, 2.699846154, 1.844846154, 1.475846154, 2.245846154, 0.814846154, 0.619846154, 3.127846154, 1.264846154, 1.580846154, 1.713846154, 1.504846154, 2.051846154, 1.616846154, 0.743846154, 2.132846154,
AT3G53000	PHLOEM PROTEIN 2-A15 PP2-A15	PHLOEM PROTEIN 2-A15 AtPP2-A15;PHLOEM PROTEIN 2-A15 PP2-A15	phloem protein 2-A15;(source:Araport11)	501682506,501682998,501710157,501710157,501728802,501776308	12432076,12529520,12912986,12912986,18775970,28724081	0.146668	0.42113	0.192666667, -0.197333333, 0.242666667, -0.067333333, 0.762666667, -0.027333333, 0.362666667, -0.467333333, 0.082666667, -0.287333333, 1.252666667, -0.107333333, 0.452666667, 0.152666667, 0.052666667, -0.457333333, -0.047333333, -0.067333333, 0.542666667, 0.562666667,	0.1786	0.0729776	0.085, 0.175, 0.127, 0.099, 0.336, 0.158, 0.141, 0.224, 0.194, 0.211, 0.29, 0.216, 0.103, 0.279, 0.081, 0.269, 0.163, 0.172, 0.127, 0.122,	0.42635	1.15496	2.3257, -0.2523, 0.3347, -0.5953, -0.1953, -0.6323, -0.0403, -1.9533, 0.6067, -0.4993, 1.9447, -0.1573, 1.0597, 0.9097, 3.1467, -0.3903, 0.4197, 1.0817, 0.7857, 0.6277,
AT3G54480	SKP1/ASK-INTERACTING PROTEIN 5 SKIP5	SKP1/ASK-INTERACTING PROTEIN 5 SKIP5; SKP5	Encodes an SKP1 interacting partner (SKIP5).	1346131,501682030,501728802	11387208,12093376,18775970	0.333	0.606962	-0.8305, -0.8405, 0.5095, 0.6795, 0.3795, 0.2195, 1.1495, 0.3395, -0.1505, -0.1305, 0.8795, 0.8995, 0.5195, -0.2905, 0.2595, -0.3105, 0.3795, 1.3295, 0.7195, 0.9495,	0.17535	0.0433423	0.142, 0.195, 0.181, 0.18, 0.164, 0.165, 0.149, 0.187, 0.147, 0.276, 0.173, 0.18, 0.213, 0.24, 0.111, 0.134, 0.099, 0.231, 0.141, 0.199,	0.7887	1.30495	3.0171, -1.8239, 0.0721, 1.3901, 0.8751, 0.7361, 2.5641, 0.2431, 1.5241, -0.4229, 2.4131, 0.0801, -1.2059, -0.9989, 0.4891, 1.7551, 0.2091, 2.0861, 1.1121, 1.6591,
AT3G54650	F BOX-LIKE17 FBL17	F BOX-LIKE17 FBL17	RNI-like superfamily protein;(source:Araport11)	501683127,501683127,5891,5891,501711234,501712764,501717484,501719428,501724408,501732776,501730071,501750880,501764322,501734651	11019805,11019805,11077244,11077244,14576160,15282545,16126853,16769150,18315867,18948957,19277118,22879821,25944099,	-0.00713158	0.68977	0.0555, -0.1245, 0.0255, -0.4245, -1.5745, -0.0745, -0.4245, -0.6945, -0.6645, -0.4545, 0.2555, 0.3955, 0.4655, 1.2755, 0.3955, -0.0345, 0.7955, 0.5655, 0.1555, 0.3755, -0.3245, 0.0355, -0.6045, -1.6045, -0.8645, -0.5945, 1.4655, 0.8155, 0.7355, 0.0955, -0.3745, -0.6245, 0.9555, -0.5445, 0.1355, 0.6055, -0.4945, 0.6255,	0.197553	0.0663808	0.193, 0.097, 0.188, 0.182, 0.273, 0.085, 0.142, 0.212, 0.183, 0.16, 0.172, 0.2, 0.212, 0.191, 0.236, 0.202, 0.263, 0.25, 0.133, 0.289, 0.238, 0.219, 0.177, 0.131, 0.332, 0.219, 0.38, 0.193, 0.141, 0.139, 0.205, 0.182, 0.146, 0.131, 0.145, 0.143, 0.16, 0.363,	0.547059	1.18472	2.254375, 1.166375, 1.757375, 0.425375, 1.617375, 1.836375, 0.248375, -0.131625, 0.161375, -0.394625, -0.140625, 0.499375, 1.198375, 0.698375, 1.189375, -0.866625, 1.292375, 1.566375, -1.463625, 0.277375, -0.648625, 0.472375, -1.089625, -3.239625, -1.301625, 1.617375, 1.323375, -0.424625, 2.730375, 1.296375, 0.557375, 0.694375, 1.742375, 0.017375, 1.277375, 1.749375, 0.609375, 0.213375,
AT3G54850	PLANT U-BOX 14 PUB14	ATPUB14;PLANT U-BOX 14 PUB14	Encodes a protein with a typical U-box domain followed by an Armadillo repeat region, a domain organization that is frequently found in plant U-box proteins. Displays ubiquitin ligase activity in vitro.	501710652,501712942,501712942,501725140,501727266,501728802	12946625,15231834,15231834,18552232,18650403,18775970	0.0196667	0.372937	-0.3245, -0.2845, -0.0445, 0.2055, 0.3655, -0.5345, 0.3155, -0.5145, -0.2345, 0.8855, -0.1045, 0.1555, 1.0355, -0.4745, -0.2345, -0.3545, -0.5845, 0.0955, 0.1455, -0.0145, -0.0945, 0.3655, 0.0455, 0.4855, 0.1155, 0.0655, 0.4255, -0.2345, -0.6645, -0.3745, 0.3555, 1.1655, 0.3055, 0.4455, 0.5655, 0.2055, 0.0255, -0.1745, -0.1845, 0.0355, 0.0155, 0.0555, -0.3645, -0.2345, -0.0945, -0.0345, -0.3245, …	0.150433	0.045147	0.118, 0.158, 0.101, 0.127, 0.126, 0.14, 0.076, 0.169, 0.128, 0.249, 0.11, 0.118, 0.149, 0.092, 0.126, 0.11, 0.101, 0.153, 0.13, 0.131, 0.246, 0.232, 0.161, 0.217, 0.131, 0.195, 0.191, 0.241, 0.129, 0.195, 0.101, 0.234, 0.112, 0.114, 0.141, 0.147, 0.136, 0.174, 0.18, 0.116, 0.163, 0.16, 0.287, 0.198, 0.134, 0.177, 0.18, 0.167, 0.158, 0.161, 0.111, 0.13, 0.138, 0.167, 0.068, 0.104, 0.104, 0.127, 0…	1.04993	1.08866	0.8124, 0.2044, 1.6454, 2.1834, 2.4644, -0.9736, 0.9484, 0.0114, 1.5094, -0.2666, -0.4816, 1.4784, 0.7514, 2.0934, 1.8904, 0.9504, 0.8294, -0.1316, 0.7754, 2.8074, -0.8066, 0.2924, 0.1414, -0.2076, 1.9124, 1.8084, 2.5914, -0.8926, 2.0804, 1.6764, 2.1354, 1.9404, 1.6684, 2.1484, 1.6564, 1.6384, 0.8964, -0.8216, -0.4196, 2.0524, 1.5024, 1.5994, 0.2034, -0.0136, 0.9494, 1.9014, -0.2156, 0.4144, 1.74…
AT3G58880			F-box/RNI-like superfamily protein;(source:Araport11)			0.365	0.368209	0.084, 0.754, 1.014, 0.444, -0.196, 0.084, -0.216, -0.096, 0.524, 0.204, 0.534, 1.224, 0.274, 0.334, 0.274, 0.474, 0.544, 0.264, 0.184, 0.594,	0.16925	0.0495983	0.143, 0.137, 0.17, 0.21, 0.12, 0.192, 0.216, 0.207, 0.201, 0.093, 0.094, 0.214, 0.141, 0.161, 0.199, 0.088, 0.257, 0.239, 0.132, 0.171,	0.25365	1.18678	0.9157, 0.0547, 0.5597, -0.4523, -0.5963, -2.3243, -1.3293, -0.2723, -0.1453, 0.8567, 1.4647, -0.0073, 1.0637, -0.1843, 1.7957, 2.5727, 1.1367, -1.5093, 1.2487, 0.2247,
AT3G58900			F-box/RNI-like superfamily protein;(source:Araport11)	501720443,501735607	17085508,20032078	0.278	0.735359	1.0175, -0.1325, 0.6575, 0.3475, 0.3175, 0.3275, -0.3725, 0.0075, -0.5625, -0.3925, 0.5875, 0.8075, 0.3175, -1.0425, 0.1375, 0.3075, -0.1925, 2.4975, 0.9075, 0.0175,	0.16295	0.0410269	0.191, 0.14, 0.187, 0.099, 0.113, 0.194, 0.099, 0.163, 0.221, 0.14, 0.158, 0.15, 0.192, 0.234, 0.226, 0.171, 0.146, 0.099, 0.167, 0.169,	1.1325	0.975174	0.7316, 1.8276, -0.0504, 2.6186, 0.8796, -0.0924, 3.1126, 0.3406, 0.0526, 1.8506, 1.6596, 1.4146, -0.0964, -0.1114, 0.5016, 2.3556, 1.6346, 1.1166, 1.0936, 1.8106,
AT3G58930			F-box/RNI-like superfamily protein;(source:Araport11)	501735607	20032078	0.2565	0.47343	0.5475, 0.1275, 0.4475, -0.2825, 0.1575, 1.1875, -0.2025, -0.3525, 0.1775, 0.7175, 0.9875, 0.0175, 0.3975, 0.0175, -0.2025, 0.4575, -0.1225, 0.2175, 1.1375, -0.3025,	0.1666	0.0528398	0.167, 0.124, 0.209, 0.261, 0.147, 0.124, 0.09, 0.12, 0.228, 0.203, 0.159, 0.086, 0.105, 0.213, 0.252, 0.199, 0.198, 0.165, 0.173, 0.109,	1.23085	1.37878	1.3706, 2.3716, -0.1474, -1.2064, 1.2926, -0.2724, 1.6546, 1.3096, 0.0896, 0.2486, 2.9006, 2.4596, 3.3446, 0.9896, -0.3014, 1.8516, 4.3866, 0.5836, 0.9186, 0.7726,
AT3G59000			F-box/RNI-like superfamily protein;(source:Araport11)	501728802	18775970	-0.71283	0.380851	-0.983333333, -0.693333333, -0.483333333, -1.163333333, -0.773333333, -0.753333333, -0.843333333, -1.183333333, -0.243333333, -0.183333333, -0.113333333, -0.113333333, -0.783333333, -1.263333333, -0.773333333, -1.303333333, -0.743333333, -0.313333333, -1.033333333, -0.513333333,	0.1397	0.0493858	0.111, 0.204, 0.156, 0.24, 0.109, 0.151, 0.07, 0.252, 0.175, 0.101, 0.17, 0.134, 0.098, 0.12, 0.115, 0.162, 0.102, 0.084, 0.132, 0.108,	0.923028	1.26963	2.075277778, -0.853722222, 2.161277778, -0.171722222, 1.516277778, 0.148277778, 0.555277778, -1.541722222, 1.051277778, 1.236277778, 2.887277778, 2.113277778, 0.934277778, -1.379722222, 1.249277778, -0.287722222, 0.620277778, 1.987277778, 2.284277778, 1.875277778,
AT3G59210			F-box/RNI-like superfamily protein;(source:Araport11)			-0.124522	0.848871	-0.263333333, -0.233333333, -0.613333333, -0.933333333, -0.533333333, -0.783333333, -0.503333333, -0.843333333, -0.363333333, -0.203333333, 0.106666667, -0.973333333, 0.366666667, -0.063333333, 0.106666667, -0.173333333, -0.193333333, -0.723333333, -0.033333333, -0.573333333, -0.33525, -0.33525, 0.16475, -0.12525, -0.14525, -0.06525, 0.24475, -0.04525, 0.35475, 4.16475, 0.13475, -0.01525, -0.6852…	0.160949	0.0684624	0.154, 0.109, 0.107, 0.124, 0.084, 0.083, 0.124, 0.17, 0.105, 0.095, 0.214, 0.093, 0.173, 0.168, 0.168, 0.128, 0.137, 0.118, 0.186, 0.144, 0.221, 0.166, 0.096, 0.122, 0.168, 0.194, 0.184, 0.134, 0.15, 0.375, 0.145, 0.159, 0.127, 0.174, 0.179, 0.194, 0.191, 0.177, 0.437,	2.20672	2.68561	1.981277778, 2.428277778, 1.501277778, 2.449277778, 3.241277778, 2.307277778, 1.522277778, 1.504277778, 2.452277778, 2.178277778, 1.837277778, 1.112277778, 2.392277778, 3.372277778, 3.003277778, 2.111277778, 1.638277778, 0.705277778, 2.139277778, 1.598277778, -0.645075, 1.312925, 3.001925, 0.867925, 2.051925, 1.918925, 2.208925, 0.792925, 0.443925, 3.992925, 1.182925, 1.444925, 1.770925, 3.122925…
AT3G59940	KISS ME DEADLY 4 KMD4	KISS ME DEADLY 4 KMD4;KELCH REPEAT F-BOX 50 KFB50; ATKFB50	Encodes a member of a family of F-box proteins, called the KISS ME DEADLY (KMD) family, that targets type-B ARR proteins for degradation and is involved in the negative regulation of the cytokinin response. Also named as KFB50, a member of a group of Kelch repeat F-box proteins that negatively regulate phenylpropanoid biosynthesis by targeting the phenypropanoid biosynthesis enzyme phenylalanine …	501682584,501682506,501707007,501716424,501720811,501724035,501727266,501730034,501754943,501757837,501762220,501766236	12407186,12432076,12795696,15960803,17217462,18305208,18650403,19291320,23720308,24363316,25502410,27247031	-0.0642268	0.681733	-0.425897436, -0.675897436, -0.645897436, -0.445897436, -0.385897436, -0.815897436, -0.005897436, -0.955897436, -1.125897436, -0.255897436, -0.265897436, -1.085897436, -0.225897436, -0.355897436, -0.195897436, -0.565897436, -0.595897436, -0.575897436, -0.795897436, 0.084102564, 0.544102564, 0.314102564, -0.725897436, 0.274102564, 1.284102564, 0.744102564, -0.145897436, -0.175897436, -0.345897436,…	0.1543	0.041639	0.139, 0.16, 0.227, 0.124, 0.144, 0.131, 0.132, 0.173, 0.122, 0.094, 0.132, 0.147, 0.206, 0.194, 0.23, 0.157, 0.161, 0.228, 0.203, 0.161, 0.085, 0.092, 0.147, 0.14, 0.134, 0.137, 0.15, 0.195, 0.159, 0.228, 0.142, 0.131, 0.107, 0.126, 0.096, 0.078, 0.127, 0.135, 0.102, 0.132, 0.215, 0.126, 0.098, 0.155, 0.217, 0.201, 0.17, 0.187, 0.188, 0.158, 0.269, 0.164, 0.126, 0.166, 0.138, 0.2, 0.155, 0.125, …	1.50963	0.910883	1.845589744, 0.963589744, 1.695589744, 2.114589744, 1.667589744, -0.019410256, 1.466589744, 0.856589744, 4.256589744, 2.076589744, 2.132589744, 0.671589744, 0.853589744, 0.894589744, 0.923589744, 0.942589744, 0.987589744, 1.120589744, -0.497410256, 2.530589744, 2.605589744, 0.896589744, 2.252589744, 1.791589744, 3.247589744, 1.642589744, 0.580589744, 1.433589744, 2.711589744, 0.712589744, 1.48458…
AT3G61060	PHLOEM PROTEIN 2-A13 PP2-A13	PHLOEM PROTEIN 2-A13 AtPP2-A13;PHLOEM PROTEIN 2-A13 PP2-A13	phloem protein 2-A13;(source:Araport11)	501681836,501682682,501682584,501682506,501682998,501705976,501707007,501710157,501710157,501710630,501714842,501714599,501717764,501718294,501720811,501723358,501729049,501724035,501727266,501728802,501728773,501739720,501776308	12169662,12368499,12407186,12432076,12529520,12753580,12795696,12912986,12912986,12953064,15546358,15659098,16212609,16330523,17217462,17937930,17953483,18305208,18650403,18775970,18783601,20736450,28724081	0.629493	0.975212	1.78825, 1.24825, 0.37825, 0.49825, 0.98825, 2.57825, 1.31825, 0.44825, 1.72825, 2.78825, 2.73825, 0.98825, 2.65825, -0.65175, 0.12825, 1.30825, 0.67825, 2.10825, 1.10825, 2.36825, 0.93825, 0.84825, 1.26825, 1.47825, 0.48825, 0.26825, 0.53825, 1.99825, -0.22175, 0.27825, 0.66825, -0.12175, -0.05175, -0.44175, -0.00175, 0.12825, 0.16825, 0.02825, -0.04175, 2.5115, 1.6715, 0.2615, 0.8115, 2.7615, 3…	0.214673	0.0774814	0.301, 0.457, 0.173, 0.188, 0.173, 0.407, 0.361, 0.277, 0.237, 0.259, 0.126, 0.325, 0.208, 0.38, 0.149, 0.183, 0.162, 0.26, 0.242, 0.225, 0.296, 0.265, 0.269, 0.259, 0.214, 0.269, 0.249, 0.256, 0.239, 0.145, 0.195, 0.121, 0.27, 0.176, 0.209, 0.276, 0.172, 0.173, 0.205, 0.124, 0.341, 0.399, 0.203, 0.242, 0.29, 0.199, 0.126, 0.25, 0.203, 0.139, 0.2, 0.196, 0.16, 0.269, 0.239, 0.279, 0.204, 0.187, 0…	0.193932	1.13436	-0.827925, -2.684925, 0.493075, -0.657925, -0.498925, 1.643075, -1.139925, 0.047075, -0.414925, 0.309075, 1.790075, -2.506925, -0.196925, -0.696925, 0.319075, 0.388075, 0.173075, 1.751075, -0.772925, 1.958075, 0.836075, 0.980075, 1.818075, 0.723075, 0.680075, 0.727075, 2.515075, 2.120075, 1.805075, 2.098075, 0.598075, -0.034925, -0.053925, -0.104925, 1.437075, -1.639925, 0.137075, 1.233075, 0.165…
AT3G61390	PUB36	PUB36	RING/U-box superfamily protein;(source:Araport11)			-0.1395	0.371362	0.3465, -0.2435, -0.3135, 0.0165, 0.4565, 0.5465, 0.3765, -0.3235, -0.3435, -0.6235, -0.0735, -0.5035, -0.3035, -0.3535, -0.3635, -0.5235, -0.1335, -0.0635, -0.6835, 0.3165,	0.1505	0.0404547	0.1, 0.16, 0.18, 0.13, 0.17, 0.13, 0.18, 0.2, 0.2, 0.19, 0.09, 0.16, 0.12, 0.21, 0.09, 0.13, 0.14, 0.16, 0.19, 0.08,	1.7432	1.01856	2.1157, 0.9247, -0.0913, 2.2857, 1.6657, 1.9087, 3.8447, 1.4447, 3.4347, 1.1747, 2.3457, 0.4407, 2.2767, 0.4757, 2.5307, 2.1067, 1.7097, 0.2077, 2.4137, 1.6487,
AT3G61590	HAWAIIAN SKIRT HWS	HS;HAWAIIAN SKIRT HWS	F-box protein that is involved in some aspect of regulation of gene silencing by miRNA. Loss of function mutations have increased levels of some miRNAs. Its activity depends on the presence of functional F-box.	501712002,501721600,501728802,501762836,501768557,501776979,501777643,501778007,501721786,501721930,501734233,501736572,501736984,501721786	14749489,17496113,18775970,25582452,26968317,28934292,29114080,29244865,,,,,,	0.177459	0.571207	0.2335, 1.5635, 1.1335, 0.9535, 0.9735, 0.1035, 0.4335, 1.1235, 1.4635, 0.7435, 0.4535, 0.0835, 0.3035, -0.0065, -0.2465, -0.3965, -0.1965, 0.5135, 0.3735, 0.2835, 0.0335, 0.5835, -0.1065, -0.1165, 0.3735, 0.8335, 0.6435, 1.0135, 1.1435, -1.0965, 0.5835, -0.2165, -0.6865, -0.3665, -0.2665, 0.1435, -0.4665, 0.9035, 0.470333333, 0.590333333, -0.489666667, -0.259666667, -0.299666667, -0.039666667, -…	0.211076	0.0616502	0.214, 0.253, 0.241, 0.217, 0.37, 0.223, 0.142, 0.287, 0.307, 0.161, 0.202, 0.202, 0.256, 0.142, 0.285, 0.272, 0.277, 0.245, 0.235, 0.231, 0.22, 0.196, 0.247, 0.134, 0.164, 0.34, 0.294, 0.143, 0.332, 0.206, 0.269, 0.272, 0.312, 0.228, 0.163, 0.289, 0.258, 0.139, 0.135, 0.192, 0.144, 0.144, 0.145, 0.177, 0.085, 0.204, 0.206, 0.16, 0.188, 0.197, 0.213, 0.097, 0.142, 0.133, 0.178, 0.326, 0.14, 0.192…	0.366125	1.15173	-0.1756, 1.0124, 0.2804, 0.1894, 0.9794, -1.3716, 2.2394, -0.8766, 0.5954, 1.7624, -0.0286, -0.8966, -0.1416, 0.1594, -3.0346, 1.8334, 0.3804, 0.0524, -0.5146, 0.2504, -0.5306, 0.5554, -0.0146, 0.0854, 0.3944, -1.7596, 1.4684, 1.7304, 0.5394, 1.2854, 1.2144, -0.9706, -1.8286, -0.2746, 0.2764, -1.2986, -0.7846, 2.5944, 1.554966667, -1.553033333, 0.894966667, 2.168966667, 1.242966667, 1.382966667, …
AT3G62980	TRANSPORT INHIBITOR RESPONSE 1 TIR1	TRANSPORT INHIBITOR RESPONSE 1 TIR1; AtTIR1	Encodes an auxin receptor that mediates auxin-regulated transcription. It contains leucine-rich repeats and an F-box and interacts with ASK1, ASK2 and AtCUL1 to form SCF-TIR1, an SCF ubiquitin ligase complex. Related to yeast Grr1p and human SKP2 proteins, involved in ubiquitin-mediated processes. Required for normal response to auxin and repressed in response to flagellin. As part of the SCF com…	3275,2777,2562,1345827,1367,1367,880,501683127,501683127,1346003,501680043,501681608,501682359,501682284,501682679,501682478,501683645,501683598,501705821,501705866,501707048,501707737,501715642,501711433,501712617,501715409,501714840,501719531,501719532,501718824,501716539,501717465,501717985,501718231,501718864,501719698,501720122,501720923,501732003,501721388,501723053,501723420,501723337,5017…	9165751,9436980,9582125,10322542,10398681,10398681,10611386,11019805,11019805,11114891,11337587,12036263,12215511,12226665,12368504,12445118,12606727,12615944,12682009,12690101,12782725,12839993,12932326,14617065,15208392,15295098,15546359,15917797,15917798,15992545,15994909,16045473,16317577,16359384,16627744,16920877,17035198,17318492,17410169,17435085,17905859,17919906,17942448,18088308,183912…	-0.143	0.536002	-0.7945, -0.3545, -0.3145, -0.3045, -0.0445, 0.1855, -0.7045, -0.7645, -0.0945, 0.1855, 0.3655, -0.3945, 0.0555, -0.5445, -1.1945, 0.0755, 0.5555, -0.2145, 0.3055, 1.1355,	0.17725	0.0529487	0.065, 0.133, 0.181, 0.16, 0.185, 0.184, 0.165, 0.265, 0.105, 0.187, 0.182, 0.168, 0.223, 0.19, 0.279, 0.168, 0.126, 0.16, 0.27, 0.149,	1.8403	1.25572	2.5211, 1.3681, 1.5911, 2.1011, 1.3231, 1.0101, 1.8571, 0.5481, 2.1331, 2.6351, 2.8531, -0.1079, 1.3491, 2.1731, 0.6851, 1.5491, 3.8561, 2.2281, -0.0739, 5.2061,
AT3G63220			Galactose oxidase/kelch repeat superfamily protein;(source:Araport11)	501707007,501728802	12795696,18775970	-0.0575	0.624861	-0.34, -0.69, 2.19, -0.55, 0.19, 0.27, -0.26, 0.07, 0.18, 0.14, -0.02, -0.27, -0.69, -0.53, -0.4, 0.33, -0.61, -0.08, -0.24, 0.16,	0.17565	0.078451	0.249, 0.368, 0.308, 0.105, 0.191, 0.137, 0.281, 0.185, 0.161, 0.1, 0.178, 0.177, 0.18, 0.09, 0.063, 0.227, 0.105, 0.136, 0.116, 0.156,	1.51485	1.37168	0.7185, -0.7675, 4.1855, 2.2295, 0.6445, 3.3095, -1.3705, 1.7245, 1.9895, 2.9865, 1.1555, 1.3545, 0.2975, 1.5715, 2.1505, 0.0465, 2.9535, 1.0825, 2.5475, 1.4875,
AT4G00755			F-box family protein;(source:Araport11)	501728802,501728773	18775970,18783601	-0.122513	0.370562	0.445384615, -0.554615385, -0.564615385, -0.344615385, -0.304615385, -0.244615385, -0.204615385, -0.164615385, -0.634615385, 0.175384615, -0.754615385, -0.464615385, 0.145384615, 0.295384615, 0.215384615, 0.015384615, 0.025384615, -0.904615385, 0.145384615, 0.215384615, -0.094615385, 0.425384615, -0.024615385, 0.695384615, -0.524615385, -0.064615385, -0.504615385, -0.224615385, 0.445384615, 0.295…	0.261763	0.0969649	0.141, 0.323, 0.259, 0.647, 0.219, 0.278, 0.163, 0.148, 0.197, 0.31, 0.291, 0.257, 0.233, 0.196, 0.218, 0.155, 0.302, 0.206, 0.248, 0.264, 0.348, 0.086, 0.346, 0.351, 0.253, 0.287, 0.158, 0.212, 0.449, 0.208, 0.372, 0.268, 0.269, 0.207, 0.299, 0.216, 0.301, 0.262,	0.488877	1.52226	2.631666667, -1.652333333, -0.296333333, 0.565666667, -1.243333333, -0.228333333, 2.385666667, 0.837666667, 2.698666667, 1.862666667, -3.501333333, 0.947666667, 2.226666667, 2.233666667, 0.203666667, 0.801666667, 0.214666667, -0.900333333, -1.742333333, 0.229666667, 0.267666667, 1.028666667, -0.168333333, 3.303666667, 0.611666667, 0.895666667, 1.279666667, -0.151333333, 1.507666667, 1.450666667, …
AT4G02440	EMPFINDLICHER IM DUNKELROTEN LICHT 1 EID1	EMPFINDLICHER IM DUNKELROTEN LICHT 1 EID1	EID1 is an F-box protein that functions as a negative regulator in phytochrome A (phyA)-specific light signalling. Expressed at all stages of plant development independently of light conditions, localizes to the nucleus, and forms nuclear speckles under continuous far-red light. Forms stable dimeric and trimeric complexes with several ASK proteins and Cullin1 in yeast and in planta.	533,501718625,501680505,501715944,501682476,501718280,501718396,501730140,501753008,501767140,501707479,501709556,501729947,501745642	10760243,11316788,11549758,11891264,12445126,16333572,16412087,19403732,23226441,26569124,,,,	0.375809	0.756584	0.191875, -0.368125, -0.398125, -0.388125, -0.298125, 1.541875, -0.488125, -0.488125, -0.758125, -0.038125, -0.478125, -0.688125, -0.768125, 0.151875, -0.208125, -0.358125, 0.021875, 0.191875, -0.268125, -0.448125, -1.828125, 0.251875, -0.028125, 1.491875, 1.851875, -0.148125, -1.698125, 0.571875, 0.501875, -0.168125, 0.481875, 1.681875, 0.241875, 0.081875, 0.351875, -0.918125, 0.031875, 0.221875…	0.197283	0.0764185	0.08, 0.146, 0.151, 0.159, 0.11, 0.318, 0.16, 0.226, 0.316, 0.196, 0.248, 0.173, 0.203, 0.152, 0.15, 0.157, 0.123, 0.17, 0.142, 0.206, 0.297, 0.337, 0.258, 0.408, 0.391, 0.132, 0.318, 0.208, 0.112, 0.195, 0.267, 0.607, 0.231, 0.165, 0.22, 0.352, 0.245, 0.2, 0.287, 0.247, 0.216, 0.2, 0.228, 0.161, 0.222, 0.155, 0.251, 0.21, 0.402, 0.206, 0.16, 0.235, 0.225, 0.17, 0.15, 0.165, 0.184, 0.183, 0.175, …	0.401121	1.03537	0.5843125, -2.1986875, 0.4813125, 0.0713125, 0.2273125, -0.1696875, 0.3253125, 0.8653125, -0.7816875, 0.7453125, -2.3216875, -1.8196875, -0.9696875, -0.6266875, 0.4233125, -0.0016875, 0.2823125, 0.6263125, 0.6163125, -0.1186875, 0.5013125, -1.1616875, 0.8963125, 0.1913125, 1.0113125, 0.6183125, -0.5006875, 1.7373125, 0.5843125, 0.9743125, 0.3923125, 0.9853125, 0.7033125, -1.4516875, 1.5963125, 0.…
AT4G02740			F-box/RNI-like superfamily protein;(source:Araport11)	501707007,501711234	12795696,14576160	0.122369	0.459619	0.297368421, 0.077368421, -0.132631579, 0.137368421, -0.212631579, -0.042631579, -0.312631579, 0.477368421, 0.417368421, -0.622631579, -0.512631579, 1.277368421, 0.077368421, 0.517368421, 0.317368421, 0.637368421, 0.127368421, -0.322631579,	0.187944	0.0555904	0.223, 0.246, 0.273, 0.24, 0.151, 0.169, 0.184, 0.208, 0.117, 0.215, 0.221, 0.211, 0.214, 0.106, 0.076, 0.245, 0.165, 0.119,	0.769746	1.49696	2.001578947, -0.583421053, 0.538578947, -1.343421053, 0.805578947, 0.845578947, -0.374421053, 1.069578947, 0.505578947, 0.944578947, 0.426578947, 5.611578947, 0.208578947, 1.255578947, 1.856578947, 0.496578947, 0.647578947, -1.057421053,
AT4G03190	GRR1-LIKE PROTEIN 1 GRH1	GRR1-LIKE PROTEIN 1 GRH1;A. THALIANA GERMIN-LIKE PROTEIN 1 ATGER1;AUXIN SIGNALING F BOX PROTEIN 1 AFB1; ATGRH1	Encodes an F box protein belonging to the TIR1 subfamily. This protein forms SCF complexes with ASK1 and CUL1 and interacts with Aux/IAA proteins in an auxin-dependent manner. It also has sequence similarity to the yeast protein GRR1, which is involved in glucose repression.	501683127,501683127,5891,5891,501681440,501712847,501719531,501718824,501718864,501727337,501727337,501735661,501742141,501745997,501746890,501761656,501766188,501768909,501775314,501777167,501727741,501727846	11019805,11019805,11077244,11077244,12008900,15258262,15917797,15992545,16627744,18628351,18628351,20018756,21408147,21457368,22042293,25329496,26236497,27040841,28472464,28969797,,	0.191667	0.827947	-0.23, 0.25, -0.2, 0.67, 0.23, -0.16, -0.26, 1.77, -0.34, 0.97, -0.13, 0.19, -0.14, 0.11, -0.3, -0.11, -0.45, -0.58, -0.57, -0.23, -0.252, -0.322, 0.028, 0.728, 0.008, 0.878, 0.038, -0.352, -0.472, 0.008, 0.268, 0.898, 0.248, 0.518, -0.112, -0.122, 4.698, -0.152, 0.318, 2.498, 0.3805, -0.0995, -0.4195, 0.1405, -0.1595, 0.4105, -0.0995, -0.5095, 0.2705, -0.3195, 1.6205, -0.1595, -0.4895, -0.1395, …	0.199467	0.0723713	0.151, 0.15, 0.092, 0.187, 0.172, 0.222, 0.28, 0.249, 0.212, 0.126, 0.172, 0.178, 0.137, 0.126, 0.208, 0.102, 0.099, 0.094, 0.116, 0.125, 0.198, 0.15, 0.307, 0.173, 0.161, 0.22, 0.111, 0.136, 0.124, 0.068, 0.141, 0.207, 0.214, 0.179, 0.211, 0.172, 0.379, 0.177, 0.128, 0.213, 0.267, 0.207, 0.21, 0.301, 0.305, 0.225, 0.281, 0.233, 0.302, 0.245, 0.381, 0.252, 0.221, 0.141, 0.294, 0.155, 0.193, 0.255…	0.975667	1.13051	1.3965, 2.5175, 2.6515, 0.7175, 1.4525, 0.2975, -0.3005, 2.8885, 1.1185, 1.0555, 1.7935, 1.8505, 1.9675, 0.5045, 1.1535, 0.7955, 1.5615, 1.1185, 3.0855, 1.9225, 0.39935, 0.99335, -1.61665, 0.87535, 0.27035, 1.25335, 0.48135, 1.12335, -0.24565, 1.21735, 1.16035, 3.10635, 0.64535, 0.28935, 0.31335, 1.23635, 1.00835, 1.78935, 1.95135, 1.30135, -0.0995, 2.5465, 1.5035, -1.3585, -1.7645, -0.0485, -0.9…
AT4G05470			RNI-like superfamily protein;(source:Araport11)	501683127,5891,5891	11019805,11077244,11077244	0.27625	0.377533	0.22575, 0.32575, 0.30575, -0.09425, -0.12425, -0.63425, 0.07575, -0.06425, -0.07425, 0.31575, 1.01575, 0.33575, 0.64575, 0.78575, 0.28575, 0.30575, 0.50575, 0.64575, 0.63575, 0.10575,	0.13615	0.0333913	0.113, 0.117, 0.166, 0.171, 0.087, 0.121, 0.103, 0.083, 0.108, 0.162, 0.156, 0.109, 0.163, 0.208, 0.182, 0.14, 0.152, 0.146, 0.116, 0.12,	0.98055	0.709702	0.0876, 1.8416, 1.2876, 1.1636, 0.0526, 0.3406, 0.9776, 1.1376, 0.7696, 0.5466, 2.3266, 1.5946, 0.5136, 1.3316, -0.5264, 0.3216, 1.8386, 1.4656, 1.2886, 1.2516,
AT4G08980	F-BOX WITH WD-40 2 FBW2	F-BOX WITH WD-40 2 FBW2;SKP1/ASK-INTERACTING PROTEIN 18 SKIP18	Encodes an F-box gene that is a novel negative regulator of AGO1 protein levels and may play a role in ABA signalling and/or response. It is a F-box subunit of the SCF E3 ubiquitin ligase complex that mediates the degradation of 14-3-3 proteins.	501683127,501683127,5891,5891,501707007,501721103,501723106,501727266,501738499,501774412	11019805,11019805,11077244,11077244,12795696,17360592,17885809,18650403,20624295,28189687	0.444626	0.970954	0.083, -0.597, 0.033, -0.297, -0.417, -1.027, -0.267, -0.127, 0.453, -0.067, 0.323, 0.143, -0.127, -0.007, -0.137, -0.577, -0.357, -0.027, -0.577, -0.317, -0.027, 0.073, 0.143, -0.277, 0.403, 0.203, -0.077, 0.523, 0.313, 0.653, -0.547, -0.287, -0.077, 0.043, -0.267, -0.537, -0.007, -0.507, -0.367, -0.037, 1.59825, 1.18825, 0.99825, -0.09175, 0.05825, 1.18825, 1.34825, 2.36825, 1.30825, 0.62825, -…	0.192154	0.0915986	0.108, 0.132, 0.217, 0.172, 0.168, 0.163, 0.096, 0.177, 0.267, 0.149, 0.173, 0.159, 0.18, 0.137, 0.119, 0.149, 0.121, 0.173, 0.062, 0.076, 0.162, 0.109, 0.089, 0.099, 0.099, 0.131, 0.201, 0.283, 0.116, 0.106, 0.191, 0.158, 0.116, 0.13, 0.127, 0.181, 0.14, 0.154, 0.134, 0.146, 0.426, 0.276, 0.206, 0.185, 0.126, 0.266, 0.197, 0.136, 0.188, 0.299, 0.168, 0.299, 0.233, 0.348, 0.229, 0.229, 0.127, 0.3…	0.892003	1.33252	0.583975, 2.087975, 3.225975, 2.410975, 1.903975, -0.039025, 2.400975, 2.528975, 0.394975, 2.455975, 2.345975, 2.922975, 2.672975, 1.722975, 1.843975, 0.961975, 0.627975, 2.747975, 2.252975, 2.530975, 0.605975, 1.208975, 1.603975, 0.768975, 1.622975, 1.978975, 0.374975, -1.496025, 1.699975, 2.724975, -0.272025, 0.948975, 2.117975, 0.058975, 0.594975, -0.119025, 2.196975, 0.743975, 1.910975, 2.110…
AT4G09920			FBD, F-box and Leucine Rich Repeat domains containing protein;(source:Araport11)			0.14975	0.499081	-0.305, 0.225, -0.745, 0.215, -0.505, 0.535, -0.285, 0.075, 0.245, -0.465, 1.185, 1.045, 1.025, 0.585, 0.135, 0.355, -0.105, 0.655, 0.755, 1.375, 0.3755, -0.0245, -0.2045, -0.3645, -0.5245, 0.0155, -0.2545, -0.1745, -0.2545, -0.0445, 0.1355, 0.2755, -0.5145, 0.2155, 0.5455, 0.4455, 0.5155, -0.0445, -0.2845, 0.1555,	0.169325	0.0473413	0.273, 0.194, 0.102, 0.279, 0.085, 0.106, 0.207, 0.234, 0.221, 0.091, 0.141, 0.249, 0.156, 0.125, 0.186, 0.225, 0.175, 0.185, 0.166, 0.178, 0.239, 0.183, 0.124, 0.149, 0.149, 0.16, 0.12, 0.137, 0.203, 0.199, 0.165, 0.174, 0.121, 0.173, 0.192, 0.139, 0.149, 0.124, 0.138, 0.157,	1.88087	1.116	0.74635, 0.19435, 1.95935, 0.43235, 1.02735, 2.60335, 0.18435, 0.39435, 0.12735, 3.34435, 4.25735, 1.58035, 2.95635, 2.09335, 1.82035, 2.17535, 1.05235, 1.54135, 3.68135, 2.72935, 4.2071, 2.4581, 0.3691, 0.9321, 1.6041, 2.0781, 1.4191, 2.0691, 1.2941, 3.1631, 3.5441, 1.1321, 2.2761, 2.7651, 0.9951, 3.1651, 2.2151, 1.6621, 0.9701, 2.0151,
AT4G10400			F-box/RNI-like/FBD-like domains-containing protein;(source:Araport11)			0.86675	0.971974	1.14475, 0.49475, 0.56475, -0.00525, 0.47475, -0.07525, -0.31525, -0.10525, -0.13525, 0.24475, 3.60475, 0.43475, 1.41475, 1.55475, 0.77475, 0.85475, 1.91475, 2.44475, 1.07475, 0.97475,	0.17685	0.0708514	0.096, 0.148, 0.236, 0.107, 0.155, 0.101, 0.088, 0.142, 0.207, 0.079, 0.321, 0.162, 0.214, 0.261, 0.16, 0.172, 0.196, 0.326, 0.209, 0.157,	1.41822	1.03279	1.696925, -0.555075, 1.028925, 2.578925, 2.342925, 1.138925, 1.353925, -0.261075, 0.051925, 2.367925, 1.155925, 0.481925, 1.524925, 0.693925, 2.697925, 0.881925, 1.308925, 2.458925, 2.237925, 3.177925,
AT4G14096			F-box/RNI-like superfamily protein;(source:Araport11)	501735607	20032078	0.311313	0.521498	0.483846154, 0.303846154, 0.543846154, 0.763846154, 0.033846154, -0.256153846, 0.253846154, -0.296153846, 1.073846154, 0.823846154, 0.663846154, 0.223846154, -0.026153846, 1.563846154, 0.673846154, -0.286153846, 0.073846154, 1.023846154, 0.063846154, -0.7745, -0.2545, 0.2455, 1.1155, -0.3045, 0.2855, 0.5855, 0.2655, -0.1045, 0.2655,	0.144241	0.0550446	0.134, 0.127, 0.112, 0.155, 0.109, 0.118, 0.127, 0.121, 0.066, 0.117, 0.178, 0.143, 0.136, 0.124, 0.273, 0.104, 0.086, 0.13, 0.141, 0.153, 0.217, 0.165, 0.182, 0.105, 0.113, 0.113, 0.132, 0.342, 0.16,	2.29842	0.951873	0.806846154, 1.185846154, 2.926846154, 2.668846154, 1.689846154, 1.993846154, 1.304846154, 2.058846154, 3.282846154, 1.919846154, 1.515846154, 1.653846154, 1.492846154, 3.836846154, 1.733846154, 2.008846154, 1.736846154, 2.090846154, 1.647846154, 1.1541, 1.6741, 3.3411, 2.6471, 4.2421, 2.1181, 4.0821, 3.9671, 3.0571, 2.8151,
AT4G14905			Galactose oxidase/kelch repeat superfamily protein;(source:Araport11)			0.372883	0.998625	0.325384615, 0.615384615, 0.315384615, 0.325384615, -0.064615385, -0.154615385, 0.255384615, 0.655384615, 1.635384615, 1.855384615, 0.455384615, 0.515384615, -0.084615385, 0.445384615, 0.345384615, 0.535384615, 0.195384615, 0.295384615, 0.495384615, 0.475384615, 0.615384615, -0.544615385, 0.135384615, 0.265384615, -0.274615385, 0.215384615, -0.124615385, -1.444615385, 1.215384615, -0.354615385, 0…	0.237825	0.0881543	0.125, 0.19, 0.263, 0.222, 0.123, 0.165, 0.227, 0.267, 0.194, 0.215, 0.224, 0.313, 0.214, 0.355, 0.301, 0.219, 0.209, 0.215, 0.203, 0.187, 0.071, 0.295, 0.199, 0.098, 0.156, 0.171, 0.154, 0.203, 0.261, 0.168, 0.241, 0.322, 0.422, 0.326, 0.47, 0.285, 0.315, 0.449, 0.278, 0.198,	1.13804	3.2108	0.594666667, 0.973666667, 1.498666667, 0.247666667, 1.772666667, 1.331666667, 0.050666667, 0.177666667, 1.089666667, -0.420333333, 2.157666667, 4.271666667, 0.631666667, 3.281666667, 1.300666667, 3.419666667, 0.154666667, 0.941666667, 2.384666667, 3.706666667, 1.023666667, 0.565666667, 0.692666667, 0.158666667, 0.521666667, 0.072666667, -0.485333333, -3.201333333, 0.385666667, -0.541333333, -0.29…
AT4G15475			F-box/RNI-like superfamily protein;(source:Araport11)	501683127,501683127,5891,5891,501728802,501766236	11019805,11019805,11077244,11077244,18775970,27247031	0.387821	0.586515	-0.2845, 1.0055, 0.0055, -0.2745, 0.1555, 0.1355, 0.0455, -0.1945, 0.74475, 1.25475, 1.31475, -0.36525, 0.37475, 0.29475, -0.30525, -0.15525, -0.28525, 0.84475, 0.61475, 1.86475, 0.22475, 0.64475, 0.39475, 0.47475, 0.99475, 0.47475, -0.21525, 1.07475,	0.150821	0.0495857	0.148, 0.169, 0.124, 0.184, 0.134, 0.218, 0.15, 0.079, 0.068, 0.149, 0.281, 0.196, 0.198, 0.086, 0.071, 0.138, 0.15, 0.109, 0.122, 0.169, 0.115, 0.109, 0.193, 0.206, 0.113, 0.172, 0.173, 0.199,	1.77183	1.28891	1.8961, 1.7451, 2.8761, 3.0971, 1.6401, 2.4101, 3.0231, 2.5641, 4.096925, 1.978925, 0.166925, 0.160925, 0.320925, 2.315925, -0.133075, 1.010925, -0.846075, 0.646925, 3.329925, 3.482925, 0.736925, 1.949925, 0.327925, 0.266925, 2.894925, 2.542925, 2.482925, 2.624925,
AT4G19870			Galactose oxidase/kelch repeat superfamily protein;(source:Araport11)	501680153,501711234	11516153,14576160	-0.142222	0.428745	-0.3535, -0.9235, -0.8735, -0.4235, -0.5335, -0.5935, 0.4165, 0.7365, -0.479210526, 0.310789474, 0.020789474, 0.400789474, 0.140789474, -0.189210526, -0.129210526, -0.759210526, -0.199210526, 0.260789474, -0.099210526, -0.169210526, -0.109210526, -0.229210526, -0.389210526, 0.700789474, -0.259210526, 0.060789474, 0.110789474, -0.429210526,	0.208143	0.0829947	0.103, 0.152, 0.159, 0.176, 0.111, 0.188, 0.099, 0.09, 0.18, 0.16, 0.11, 0.24, 0.17, 0.15, 0.19, 0.31, 0.26, 0.28, 0.37, 0.26, 0.4, 0.19, 0.21, 0.32, 0.17, 0.19, 0.29, 0.3,	1.24835	1.08416	2.6869, 1.0589, 0.9649, 1.7559, 1.7329, 0.6739, 2.7679, 2.4389, 0.598684211, 1.278684211, 1.398684211, -0.031315789, -0.151315789, -0.501315789, 3.148684211, 1.008684211, 1.198684211, 0.078684211, -0.011315789, 1.408684211, 2.048684211, 1.198684211, 2.438684211, -0.261315789, 2.198684211, 2.168684211, 2.378684211, -0.721315789,
AT4G21240			F-box and associated interaction domains-containing protein;(source:Araport11)	501712377	15047898	0.00242531	0.569344	0.45075, -0.49925, 0.03075, -0.15925, -0.12925, 0.12075, 0.17075, 0.30075, 0.10075, 0.11075, -0.10925, 0.17075, 0.21075, 0.57075, 0.27075, 0.35075, -0.30925, -0.09925, 0.08075, 1.53075, 0.77075, 0.27075, 0.35075, 0.90075, 0.62075, 0.73075, 1.23075, 1.27075, 0.68075, 0.50075, 1.29075, 0.11075, 0.03075, 0.65075, 0.37075, -0.04925, 0.65075, 0.36075, 0.31075, 0.624102564, 0.274102564, -0.685897436, -…	0.166885	0.0496808	0.265, 0.122, 0.11, 0.12, 0.187, 0.156, 0.125, 0.14, 0.168, 0.137, 0.107, 0.182, 0.168, 0.113, 0.182, 0.144, 0.146, 0.122, 0.124, 0.21, 0.234, 0.186, 0.249, 0.212, 0.188, 0.187, 0.201, 0.177, 0.243, 0.226, 0.174, 0.224, 0.128, 0.183, 0.258, 0.225, 0.161, 0.115, 0.133, 0.16, 0.188, 0.209, 0.142, 0.139, 0.248, 0.229, 0.106, 0.182, 0.207, 0.199, 0.109, 0.092, 0.12, 0.089, 0.156, 0.214, 0.139, 0.103,…	1.15382	0.887026	-0.584225, 0.506775, 2.372775, 1.686775, 1.547775, 1.316775, 1.691775, 1.884775, 1.732775, 1.592775, 0.214775, -0.308225, 0.287775, 1.351775, 0.935775, 0.832775, 2.479775, 1.298775, 2.060775, 1.859775, 1.674775, 1.702775, 0.385775, 1.980775, 0.969775, 1.740775, 1.604775, 1.531775, 2.194775, 0.307775, -0.037225, 0.198775, 1.063775, 1.222775, 1.629775, 1.245775, 0.843775, 0.623775, 0.759775, 1.0275…
AT4G22390			F-box associated ubiquitination effector family protein;(source:Araport11)	501712830,501718506,501735607	15266052,16489130,20032078	-0.024618	0.29893	-0.104615385, 0.365384615, -0.054615385, 0.175384615, -0.384615385, -0.344615385, -0.274615385, -0.434615385, -0.154615385, -0.154615385, 0.445384615, -0.254615385, 0.445384615, 0.205384615, -0.154615385, 0.115384615, -0.114615385, -0.374615385, 0.505384615, 0.055384615,	0.26125	0.075293	0.314, 0.243, 0.391, 0.309, 0.268, 0.228, 0.159, 0.215, 0.302, 0.295, 0.269, 0.338, 0.211, 0.168, 0.368, 0.221, 0.339, 0.238, 0.267, 0.082,	0.241567	1.57043	1.314666667, 2.302666667, 0.074666667, 0.550666667, 1.495666667, -1.530333333, 0.017666667, 1.530666667, 1.009666667, 1.281666667, 0.519666667, -2.863333333, 0.222666667, 2.762666667, -1.718333333, -0.010333333, -2.689333333, -1.525333333, 0.678666667, 1.406666667,
AT4G29370			Galactose oxidase/kelch repeat superfamily protein;(source:Araport11)			0.547298	0.664926	0.14825, 0.28825, -0.02175, 0.38825, 0.27825, 0.10825, 0.42825, 1.31825, 2.15825, 1.26825, -0.74175, -0.53175, -0.12175, 1.52825, 0.21825, 0.04825, 0.67825, 0.26825, 1.62825, 0.64825, 1.75825, 1.90825, 1.08825, 0.55825, 0.35825, 0.36825, 0.44825, 0.32825, 1.42825, 0.25825, 0.06825, -0.43175, 0.19825, 0.52825, 0.48825, 0.60825, 0.34825, -0.11175, 0.89825, 1.46825, -0.24775, 0.34225, 0.12225, 0.272…	0.220513	0.0795891	0.271, 0.153, 0.15, 0.102, 0.169, 0.13, 0.222, 0.425, 0.268, 0.161, 0.144, 0.166, 0.207, 0.204, 0.27, 0.286, 0.257, 0.278, 0.286, 0.281, 0.21, 0.321, 0.304, 0.243, 0.109, 0.287, 0.289, 0.169, 0.294, 0.125, 0.145, 0.1, 0.178, 0.128, 0.144, 0.217, 0.324, 0.202, 0.156, 0.164, 0.181, 0.145, 0.17, 0.198, 0.133, 0.162, 0.168, 0.239, 0.328, 0.241, 0.125, 0.147, 0.175, 0.166, 0.152, 0.12, 0.126, 0.101, 0…	0.730253	1.3917	-2.417925, -0.098925, 1.296075, 0.440075, 0.482075, 1.754075, 1.428075, -0.963925, 0.474075, 1.301075, 0.052075, 0.476075, -1.329925, -1.341925, -0.471925, 1.308075, -0.885925, 0.037075, 0.438075, 0.361075, 3.418075, 3.621075, 2.746075, 2.785075, 1.774075, 1.946075, 1.232075, 2.008075, 3.193075, 2.983075, 0.771075, 1.628075, 0.665075, 1.557075, 1.503075, 1.600075, 1.799075, 1.904075, 1.208075, 1.…
AT4G29420			F-box/RNI-like superfamily protein;(source:Araport11)	501728802	18775970	-0.0432071	0.621295	-0.6435, -0.7635, -0.6135, -0.9935, -0.7135, -1.1835, -0.6935, -0.4735, -1.4435, -0.1335, -0.9135, -0.7535, -0.0035, -0.6435, -0.3135, -0.5835, -0.1735, -0.1435, -0.1935, -0.5135, 1.020789474, 1.640789474, 0.710789474, 0.520789474, 0.060789474, -0.989210526, 0.640789474, 1.020789474, -0.269210526, 0.920789474, 0.300789474, 0.560789474, 0.330789474, -0.149210526, -0.479210526, 0.230789474, 0.16078…	0.195915	0.0717674	0.129, 0.182, 0.116, 0.099, 0.132, 0.14, 0.082, 0.153, 0.18, 0.162, 0.146, 0.184, 0.18, 0.336, 0.166, 0.133, 0.132, 0.118, 0.212, 0.117, 0.26, 0.23, 0.17, 0.1, 0.13, 0.29, 0.11, 0.15, 0.17, 0.18, 0.14, 0.09, 0.26, 0.22, 0.13, 0.28, 0.13, 0.31, 0.34, 0.1, 0.15, 0.29, 0.2, 0.29, 0.27, 0.25, 0.23, 0.29, 0.26, 0.19, 0.23, 0.26, 0.34, 0.22, 0.2, 0.23, 0.17, 0.27, 0.33,	1.59405	1.09057	3.1329, 1.0539, 2.2589, 2.1169, 2.6709, 1.7019, 1.5309, 2.3529, 1.2579, 2.8229, 2.7159, 2.1969, 3.8369, 1.8609, 0.5469, 1.6519, 2.9129, 2.4579, 2.5079, 3.4219, 4.138684211, 1.928684211, 1.558684211, 1.198684211, 1.638684211, 0.088684211, 3.238684211, 2.258684211, 1.368684211, 2.518684211, 1.038684211, 1.658684211, 1.408684211, -0.681315789, 2.318684211, 1.578684211, 1.318684211, 0.818684211, 1.28…
AT4G33210	SLOW MOTION SLOMO	SLOW MOTION SLOMO	Encodes SLOMO (SLOW MOTION), a F-box protein required for auxin homeostasis and normal timing of lateral organ initiation at the shoot meristem.	501683127,501683127,5891,5891,501728802,501736219	11019805,11019805,11077244,11077244,18775970,20139162	-0.214	0.270661	-0.8445, -0.4645, -0.2345, -0.4245, -0.2745, -0.3945, 0.4455, -0.2345, -0.5645, -0.1545, 0.0355, 0.0355, -0.1245, -0.3945, -0.0645, 0.0055, -0.2645, 0.0055, -0.2045, -0.1645,	0.1515	0.0449918	0.107, 0.214, 0.154, 0.094, 0.135, 0.158, 0.245, 0.132, 0.118, 0.214, 0.168, 0.112, 0.159, 0.078, 0.146, 0.132, 0.185, 0.117, 0.142, 0.22,	1.48055	0.887724	2.2701, 0.2351, 1.8181, 2.6791, 1.0121, 0.8501, 0.9721, 2.6001, 1.0671, 0.1161, 2.0361, 2.1701, 1.3991, 3.0401, 0.8111, 1.2021, -0.0149, 1.4311, 2.5251, 1.3911,
AT4G39550			Galactose oxidase/kelch repeat superfamily protein;(source:Araport11)	501680153,501682584,501711234,501712002	11516153,12407186,14576160,14749489	0.163875	0.533858	-0.1005, 0.5995, 0.3895, 0.2295, 0.1295, 1.6595, 0.4095, -0.7205, 0.0795, 0.2395, 1.6895, 0.4695, 0.2095, 0.4395, 0.4995, -0.1405, 1.0095, 0.7795, 0.5795, 0.4395, 0.19475, -0.36525, 0.36475, -0.58525, -0.48525, 0.22475, -0.30525, -0.38525, -0.01525, 0.01475, -0.15525, -0.22525, 0.61475, -0.22525, 0.04475, -0.15525, 0.33475, -0.48525, -0.49525, -0.24525,	0.145175	0.0517037	0.147, 0.118, 0.135, 0.247, 0.09, 0.14, 0.186, 0.123, 0.122, 0.229, 0.18, 0.208, 0.089, 0.084, 0.107, 0.144, 0.207, 0.141, 0.356, 0.126, 0.098, 0.16, 0.131, 0.12, 0.121, 0.171, 0.11, 0.166, 0.138, 0.125, 0.104, 0.11, 0.165, 0.148, 0.097, 0.161, 0.18, 0.115, 0.104, 0.104,	1.00204	1.2718	-0.2649, 1.5611, 0.5361, -0.2019, -0.1239, 3.1041, 0.0971, 0.1681, -0.3889, -0.0109, 0.9851, -1.0699, 0.8451, 0.0601, 0.2191, -0.4669, 0.0361, 0.0911, -1.7949, -0.1769, 2.527925, 1.808925, 1.714925, 0.914925, 1.850925, 0.126925, -0.005075, 2.668925, 1.020925, 1.185925, 3.384925, 1.900925, 2.523925, 2.125925, 2.187925, 1.290925, 2.127925, 3.639925, 1.807925, 2.071925,
AT4G39560			Galactose oxidase/kelch repeat superfamily protein;(source:Araport11)	501680153,501682666	11516153,12372144	0.762	0.527635	-0.9005, 0.5495, 0.4595, 0.3995, 0.8795, 1.2195, 1.0995, 0.5095, 0.7695, 1.3295, 1.0995, 1.2195, 1.1095, 1.0995, 0.1995, 0.7095, 0.2495, 1.0695, 1.2995, 0.8695,	0.19545	0.0475599	0.263, 0.227, 0.191, 0.171, 0.189, 0.167, 0.193, 0.248, 0.197, 0.324, 0.167, 0.153, 0.187, 0.137, 0.243, 0.119, 0.189, 0.184, 0.15, 0.21,	0.647	0.752725	0.3791, 1.3221, 0.7671, -0.7689, 0.2911, 1.5951, 0.9741, 0.3111, 0.6301, 1.5511, 0.0021, 0.2811, 0.9051, 0.7281, 1.7961, 1.2301, 0.9751, -0.9769, 1.2041, -0.2569,
AT4G39570			Galactose oxidase/kelch repeat superfamily protein;(source:Araport11)	501680153,501711234	11516153,14576160	0.302648	0.644564	1.26225, 0.83225, 0.02225, -0.37775, 0.45225, 0.02225, 0.03225, 1.37225, 0.80225, 1.20225, 0.89225, -0.03775, 1.28225, 0.00225, 0.25225, 1.25225, 0.46225, 1.10225, 1.25225, 0.69225, 0.61225, 0.16225, 0.21225, 0.37225, 1.17225, 0.74225, 0.55225, 0.69225, 1.39225, 0.64225, 0.58225, 0.52225, 0.56225, 0.35225, 0.87225, 1.17225, 1.11225, 0.64225, 0.160333333, -0.409666667, -0.709666667, -0.149666667, …	0.19353	0.0527013	0.225, 0.298, 0.14, 0.122, 0.239, 0.124, 0.176, 0.205, 0.132, 0.243, 0.199, 0.209, 0.238, 0.213, 0.15, 0.186, 0.289, 0.186, 0.165, 0.198, 0.195, 0.296, 0.258, 0.263, 0.247, 0.284, 0.262, 0.227, 0.178, 0.107, 0.171, 0.112, 0.113, 0.194, 0.105, 0.107, 0.208, 0.133, 0.188, 0.193, 0.165, 0.202, 0.259, 0.178, 0.272, 0.162, 0.075, 0.119, 0.149, 0.226, 0.173, 0.239, 0.206, 0.245, 0.196, 0.238, 0.183, 0.…	0.457668	1.0985	0.631475, 0.847475, 1.270475, 2.099475, 0.921475, 1.364475, -0.374525, 1.018475, 0.909475, 0.390475, 0.320475, 0.234475, 1.272475, 0.210475, 0.976475, -0.273525, -0.709525, 0.478475, 1.164475, -0.681525, 2.025475, 1.098475, -1.344525, 0.565475, 0.868475, 1.202475, 1.243475, -0.559525, 0.473475, 2.031475, 0.320475, 2.008475, 2.373475, 0.810475, 1.829475, 2.116475, 1.776475, 2.749475, 1.684966667, …
AT4G39580			Galactose oxidase/kelch repeat superfamily protein;(source:Araport11)	501680153	11516153	-0.2955	0.573582	-0.6335, -0.3035, -0.7235, -0.7935, -0.6935, -0.7835, -0.3935, -0.6135, -1.0135, -0.1335, -0.0335, -0.7635, -0.5735, -0.5235, 0.5565, 0.2565, 1.4465, -0.0635, 0.0165, -0.1435,	0.1343	0.051913	0.12, 0.133, 0.133, 0.111, 0.071, 0.126, 0.096, 0.115, 0.116, 0.058, 0.235, 0.084, 0.173, 0.095, 0.216, 0.119, 0.238, 0.114, 0.202, 0.131,	2.6588	0.605246	3.1529, 1.8839, 2.6879, 2.8519, 2.1199, 2.9479, 2.8889, 3.8409, 2.4409, 2.8609, 2.6769, 2.5619, 2.1799, 2.0329, 2.3859, 1.4299, 3.7249, 3.4479, 2.2499, 2.8099,
AT4G39600			Galactose oxidase/kelch repeat superfamily protein;(source:Araport11)	501680153	11516153	0.375	0.458993	0.122, 0.152, 0.112, 0.112, -0.308, 0.062, -0.058, 0.322, 0.212, 0.482, 1.052, -0.218, 0.692, 0.782, 1.112, 0.242, 1.502, 0.452, 0.192, 0.482,	0.17405	0.0690267	0.176, 0.108, 0.148, 0.231, 0.215, 0.151, 0.197, 0.23, 0.16, 0.094, 0.206, 0.098, 0.284, 0.205, 0.241, 0.107, 0.318, 0.164, 0.067, 0.081,	-0.1854	1.25553	-0.8264, 1.5576, -1.4234, -1.4884, -2.4734, -1.2974, -2.2514, -1.2614, -0.9874, 1.2756, 0.1576, 0.3846, 0.4456, 0.8046, 1.5716, -0.1434, -0.0084, -0.0684, 1.2326, 1.0916,
AT5G01720			RNI-like superfamily protein;(source:Araport11)	501683127,501683127,5891,5891,501712936,501714247,501714243,501727266	11019805,11019805,11077244,11077244,15235117,15489280,15489341,18650403	-0.0395015	0.497916	0.351578947, 0.541578947, -0.058421053, 1.761578947, -0.098421053, -0.518421053, 0.141578947, 0.311578947, 0.301578947, 0.421578947, 0.421578947, -0.178421053, 0.051578947, -0.198421053, 0.321578947, 0.311578947, 0.141578947, -0.288421053, -0.388421053, -0.128421053, -0.298421053, -0.118421053, -0.578421053, -0.728421053, -0.328421053, 0.111578947, 0.281578947, -0.308421053, 0.501578947, -0.18842…	0.264378	0.0919436	0.158, 0.287, 0.211, 0.228, 0.288, 0.252, 0.291, 0.212, 0.212, 0.386, 0.264, 0.391, 0.256, 0.209, 0.316, 0.125, 0.244, 0.298, 0.247, 0.127, 0.234, 0.559, 0.166, 0.178, 0.182, 0.36, 0.412, 0.151, 0.281, 0.192, 0.327, 0.379, 0.271, 0.19, 0.247, 0.244, 0.407,	1.12303	1.03686	1.575973684, 1.353973684, 1.186973684, 1.691973684, 3.319973684, 0.981973684, 0.754973684, 1.906973684, 1.821973684, 1.829973684, 0.943973684, 1.445973684, 0.127973684, 1.575973684, 1.929973684, 2.777973684, 1.584973684, -2.680026316, 1.372973684, 2.012973684, 1.997973684, 0.639973684, 0.783973684, -0.146026316, -0.108026316, 0.988973684, 1.301973684, 0.726973684, 1.254973684, 0.806973684, 0.8099…
AT5G03020			Galactose oxidase/kelch repeat superfamily protein;(source:Araport11)			0.331145	0.548264	0.512, 0.852, 0.222, -0.068, 0.212, 0.332, 0.312, 0.052, 0.032, 0.402, 0.162, 0.122, 0.842, 0.382, 0.542, 0.282, 1.132, 0.432, -0.088, 0.652, 0.980789474, 0.600789474, 0.440789474, 2.770789474, -0.639210526, 0.510789474, 0.480789474, 0.710789474, 0.330789474, -0.109210526, 0.190789474, 0.600789474, -0.199210526, -0.039210526, -0.039210526, 0.100789474, -0.489210526, 0.060789474, -0.109210526, -0.…	0.181225	0.0750195	0.276, 0.211, 0.136, 0.134, 0.064, 0.098, 0.069, 0.311, 0.127, 0.207, 0.08, 0.105, 0.21, 0.209, 0.092, 0.099, 0.192, 0.158, 0.166, 0.085, 0.26, 0.1, 0.17, 0.22, 0.17, 0.13, 0.15, 0.26, 0.17, 0.18, 0.12, 0.22, 0.32, 0.21, 0.19, 0.26, 0.26, 0.23, 0.39, 0.21,	0.847242	1.08824	-1.6504, 0.2596, 0.3666, -0.4734, 0.0336, 0.6596, 1.3146, -1.5364, -0.2074, -0.8344, 0.0566, 0.3976, 0.3656, 0.4446, 0.9336, 0.5146, 0.1916, 0.9156, -0.8004, 1.8946, 1.958684211, 1.428684211, -0.011315789, 0.168684211, 2.268684211, 1.928684211, 2.388684211, 1.548684211, 2.178684211, 2.188684211, 1.378684211, 1.948684211, 0.788684211, 0.398684211, 2.788684211, 0.928684211, 2.198684211, 1.218684211…
AT5G09800	PUB28	PUB28	ARM repeat superfamily protein;(source:Araport11)	501710652,501713175,501714511,501722879,501722879,501727236,501728802	12946625,15375205,15634198,17722694,17722694,18664614,18775970	-0.00975	0.320488	0.0865, 0.4565, 0.3065, 0.0565, -0.0135, -0.1135, -0.5435, -0.3135,	0.1125	0.0324037	0.09, 0.05, 0.15, 0.11, 0.13, 0.14, 0.1, 0.13,	1.73882	0.72796	1.2747, 2.5997, 1.9537, 3.0217, 1.5497, 1.3537, 1.1307, 1.0267,
AT5G15440	EID1-LIKE 1 EDL1	EID1-LIKE 1 EDL1	EID1-like 1;(source:Araport11)	501718396,501723877	16412087,18221561	0.0425814	0.368194	-0.170666667, -0.410666667, 0.419333333, 0.479333333, 0.549333333, 0.469333333, -0.180666667, -0.220666667, -0.010666667, 0.349333333, -0.260666667, -0.120666667, 0.219333333, 0.829333333, -0.430666667, 0.749333333, -0.140666667, 0.059333333, 0.489333333, -0.170666667, -0.280666667, 0.139333333, -0.250666667, 0.529333333, -0.310666667, 0.099333333, 0.219333333, -0.710666667, 0.179333333, -0.01066…	0.143825	0.035945	0.149, 0.131, 0.166, 0.095, 0.181, 0.122, 0.121, 0.127, 0.151, 0.144, 0.135, 0.138, 0.128, 0.114, 0.122, 0.148, 0.084, 0.124, 0.191, 0.211, 0.178, 0.138, 0.143, 0.127, 0.118, 0.166, 0.139, 0.214, 0.144, 0.152, 0.174, 0.113, 0.282, 0.107, 0.143, 0.112, 0.122, 0.121, 0.147, 0.131,	1.04799	1.06821	1.169066667, 2.470066667, 0.833066667, 0.806066667, -0.551933333, 1.646066667, 2.093066667, 1.295066667, 0.894066667, 2.766066667, -0.239933333, -0.627933333, 2.211066667, 0.212066667, 2.199066667, 1.729066667, 1.596066667, 1.181066667, 2.134066667, 0.903066667, 1.685066667, 1.791066667, 1.754066667, 2.534066667, -0.325933333, 0.735066667, -0.239933333, 0.151066667, 1.217066667, 1.440066667, -0.5…
AT5G15710			Galactose oxidase/kelch repeat superfamily protein;(source:Araport11)	501717595,501724145	16166256,18273637	-0.261793	0.366339	-0.948125, -0.388125, -0.238125, -0.378125, -0.388125, -0.918125, -0.488125, -0.078125, -0.558125, -0.128125, -0.158125, -0.158125, 0.311875, 0.091875, 0.341875, -0.068125, -1.028125, -0.408125, -0.378125, -0.048125, -0.288125, -0.108125, 0.721875, -0.118125, -0.578125, -0.248125, -0.218125, -0.258125, -0.558125, -0.188125,	0.179033	0.0415497	0.206, 0.153, 0.241, 0.148, 0.219, 0.198, 0.113, 0.204, 0.135, 0.158, 0.177, 0.208, 0.132, 0.15, 0.179, 0.176, 0.155, 0.215, 0.128, 0.143, 0.167, 0.109, 0.178, 0.189, 0.21, 0.24, 0.174, 0.234, 0.148, 0.284,	0.0595125	1.13526	-1.2486875, 0.6803125, 0.4773125, 0.6913125, 0.2463125, -1.3986875, -1.2166875, 0.6453125, -0.5436875, 0.8503125, -0.0126875, -1.6706875, 2.8303125, 1.2583125, 1.7593125, 0.1513125, -0.2166875, -0.0236875, 1.0123125, -0.9946875, -1.4716875, 0.6113125, 0.1683125, -0.1006875, -1.3496875, 1.4883125, 1.4923125, -0.6406875, -1.7326875, 0.0443125,
AT5G18320	PLANT U-BOX 46 PUB46	PLANT U-BOX 46 PUB46	One of three tandemly located, paralogous plant U-box proteins. Mutants show increased sensitivity to water stress.Expression in roots is enhanced by auxin and to a lesser extent ABA and cytokinin treatment.	501773953	28077082	-0.261441	0.656873	0.9165, -0.5235, 0.2565, -0.2735, -0.2235, 0.1065, 0.0865, 0.6265, 0.9965, 0.0265, 0.1965, 0.0865, 0.0765, 0.4465, -0.1265, -0.0965, 0.2235, -0.4865, -0.4165, 0.0535, 0.0735, -1.1965, -0.5365, -1.2665, -1.0565, -0.8065, -1.0165, -1.2265, -0.4265, -1.0065, -1.2165, 0.0735, -1.6265, 0.3935,	0.196176	0.0888654	0.19, 0.4, 0.24, 0.28, 0.19, 0.29, 0.21, 0.09, 0.09, 0.1, 0.14, 0.11, 0.22, 0.11, 0.14, 0.13, 0.15, 0.12, 0.14, 0.24, 0.18, 0.52, 0.16, 0.13, 0.2, 0.27, 0.17, 0.2, 0.24, 0.16, 0.21, 0.28, 0.22, 0.15,	0.910524	1.2889	2.6467, -0.6983, 3.1817, 1.0247, 2.4057, 0.9867, 3.0117, 2.6357, 2.8277, 1.4767, 0.4317, 2.3207, 1.8687, 3.1327, 0.62625, 0.80625, 0.17625, 1.26625, 0.83625, 0.21625, 0.04625, -1.84375, -0.11375, 1.64625, 0.31625, -0.06375, 0.21625, -0.37375, -0.42375, -0.13375, 0.96625, -0.32375, 0.77625, -0.91375,
AT5G18330	PLANT U-BOX 47 PUB47	PLANT U-BOX 47 PUB47	One of three tandemly located, paralogous plant U-box proteins. Expression in root is enhanced by auxin and to a lesser extent ABA and cytokinin.PUB47 is expressed at lower levels than PUB46 and PUB48. Expression increased in response to salt, osmotic and oxidative stress.	501773953	28077082	0.11207	0.490029	0.0265, -0.2035, -0.0035, -0.4635, -0.0635, -0.2835, 0.3265, 0.1865, 0.1665, -0.3735, -0.1335, 0.1865, -0.3635, 0.0565, 0.2365, 0.5865, 1.5165, 1.2365, 0.1565, -0.1035, -0.03103, 0.118974, -0.37103, -0.57103, 0.828974, 0.248974,	0.150654	0.0591229	0.12, 0.23, 0.08, 0.25, 0.24, 0.31, 0.24, 0.14, 0.13, 0.11, 0.12, 0.13, 0.09, 0.16, 0.13, 0.09, 0.16, 0.13, 0.17, 0.08, 0.176, 0.109, 0.111, 0.161, 0.1, 0.15,	1.46139	0.807736	1.8407, 1.0777, 0.6147, 0.8877, 0.7417, 0.0587, 1.6237, 1.2487, 0.6747, 0.6547, 1.5657, 1.2607, 2.2177, 1.7607, 0.6907, 2.6787, 1.4597, 1.3647, 0.7597, 0.6397, 2.035525, 2.514525, 1.952525, 1.529525, 2.676525, 3.466525,
AT5G18340	PLANT U-BOX 48 PUB48	PLANT U-BOX 48 PUB48	One of three tandemly located, paralogous plant U-box proteins. Mutants show increased sensitivity to water stress.	501773953	28077082	0.175689	0.756713	0.5065, -0.1835, 0.2365, 0.4765, 0.3765, 0.0865, -0.1135, -0.3335, 0.4065, -0.4435, -0.1035, 0.2665, 0.0265, 0.8365, 0.3065, 0.1765, 0.1365, -0.0335, 0.3165, -0.0435, -0.0065, -0.3365, -0.3665, 1.2635, 0.4935, 0.4735, 0.7635, -0.5165, 2.6235, -1.4665, 1.8335, 2.0435, -0.2265, -0.5865, -0.7765, -0.4865, 0.3735, 2.2935, 0.6135, 0.2135, 0.0055, -0.2745, 0.3455, -0.2145, -0.1945, -0.1345, 0.8355, 0.2…	0.164547	0.0685017	0.23, 0.18, 0.18, 0.29, 0.23, 0.23, 0.37, 0.23, 0.08, 0.16, 0.12, 0.11, 0.13, 0.23, 0.11, 0.11, 0.07, 0.13, 0.1, 0.17, 0.2, 0.21, 0.1, 0.18, 0.16, 0.29, 0.17, 0.11, 0.1, 0.14, 0.26, 0.19, 0.09, 0.27, 0.26, 0.16, 0.23, 0.23, 0.25, 0.18, 0.103, 0.123, 0.114, 0.088, 0.127, 0.068, 0.086, 0.101, 0.116, 0.202, 0.154, 0.114, 0.085,	1.42208	1.40988	-0.6413, 0.4467, 0.2467, 0.7477, 0.3697, 0.7147, 0.0217, 1.7977, -1.3283, -0.1973, 1.8417, 1.7447, 2.5987, 2.7337, 0.5187, 2.1647, 2.0307, 1.8677, 1.0467, 2.4487, -0.13375, 1.24625, 2.27625, 2.08625, 1.22625, 1.46625, 2.11625, 1.82625, 2.39625, 3.71625, 5.16625, 5.81625, 3.73625, 0.02625, -0.04375, 2.08625, 1.51625, 4.71625, 1.60625, 1.11625, 0.1064, 0.6574, 0.4324, 0.4064, 1.1494, 0.6544, 0.2694…
AT5G18680	TUBBY LIKE PROTEIN 11 TLP11	TUBBY LIKE PROTEIN 11 AtTLP11;TUBBY LIKE PROTEIN 11 TLP11	Member of TLP family	1345963,1345963,501712329,501760944	11118137,11118137,15064372,25168737	-0.208199	0.62576	-1.005897436, -0.845897436, -0.305897436, 0.054102564, -0.785897436, -0.745897436, -1.105897436, -0.955897436, -0.485897436, -0.355897436, 0.394102564, -0.355897436, -0.715897436, -0.695897436, -1.055897436, 0.504102564, -0.645897436, -0.615897436, -0.385897436, 0.544102564, 2.184102564, 0.084102564, 0.104102564, -0.095897436, 1.104102564, 0.044102564, 0.014102564, -0.585897436, -0.515897436, 0.3…	0.155945	0.0596916	0.133, 0.122, 0.208, 0.284, 0.142, 0.11, 0.198, 0.12, 0.157, 0.164, 0.14, 0.118, 0.149, 0.127, 0.104, 0.157, 0.174, 0.163, 0.133, 0.11, 0.352, 0.205, 0.063, 0.097, 0.122, 0.119, 0.103, 0.125, 0.117, 0.244, 0.082, 0.109, 0.175, 0.121, 0.33, 0.159, 0.145, 0.147, 0.172, 0.113, 0.137, 0.197, 0.176, 0.284, 0.202, 0.128, 0.192, 0.096, 0.17, 0.273, 0.145, 0.116, 0.125, 0.098, 0.125,	1.61783	1.07815	1.760589744, 2.384589744, 2.335589744, 1.388589744, 2.648589744, 2.377589744, 2.228589744, 2.857589744, 4.063589744, 3.262589744, 1.814589744, 1.771589744, 0.916589744, 2.229589744, 1.367589744, 1.818589744, -0.430410256, 1.302589744, 3.123589744, 1.708589744, 3.935589744, 1.700589744, 2.162589744, 1.458589744, 2.763589744, 2.723589744, 1.917589744, 2.039589744, 1.942589744, 2.504589744, 1.633589…
AT5G18780			F-box/RNI-like superfamily protein;(source:Araport11)	501727266,501739720	18650403,20736450	0.0239367	0.0655452	0.040421053, -0.003578947, -0.095578947, -0.035578947, 0.118421053, -0.000578947, 0.056421053, 0.040421053, 0.148421053, -0.047578947, -0.044578947, 0.051421053, 0.038421053, 0.033421053, 0.128421053, 0.035421053, -0.087578947, 0.020421053, 0.074421053, -0.006578947, 0.087421053, 0.026421053, 0.044421053, -0.049578947, 0.028421053, 0.138421053, -0.008578947, 0.119421053, -0.014578947, -0.02357894…	0.247516	0.0655448	0.264, 0.22, 0.128, 0.188, 0.342, 0.223, 0.28, 0.264, 0.372, 0.176, 0.179, 0.275, 0.262, 0.257, 0.352, 0.259, 0.136, 0.244, 0.298, 0.217, 0.311, 0.25, 0.268, 0.174, 0.252, 0.362, 0.215, 0.343, 0.209, 0.2, 0.153,	0.602396	1.31832	1.837105263, 0.256105263, 2.182105263, 0.291105263, -2.445894737, -0.106894737, -1.285894737, 1.570105263, -0.834894737, -0.435894737, 2.054105263, 1.498105263, 1.916105263, 2.640105263, 0.179105263, 0.642105263, 1.761105263, 2.346105263, 1.180105263, 1.670105263, 0.207105263, -2.700894737, 0.586105263, 1.877105263, 0.937105263, 0.296105263, 0.389105263, 0.939105263, -0.588894737, -0.404894737, 0…
AT5G21040	F-BOX PROTEIN 2 FBX2	F-BOX PROTEIN 2 FBX2	Encodes an F-box containing protein that interacts physically with BHLH32 and appears to be involved in mediating phosphate starvation responses. Its expression is responsive to phosphate (Pi) and not phosphite (Phi) in roots and shoots.	501681836,501710652,501720728,501728802,501728930,501757764,501763075	12169662,12946625,17240087,18775970,18930958,24377444,25697796	0.4245	0.617652	0.242, 0.022, 0.602, 0.272, 0.112, 0.082, 0.012, -0.118, 0.092, -0.028, 0.922, 0.462, 2.052, 0.022, -0.178, 0.562, 1.812, 1.152, 0.152, 0.242,	0.2004	0.0799733	0.343, 0.174, 0.317, 0.142, 0.202, 0.081, 0.092, 0.179, 0.165, 0.259, 0.251, 0.251, 0.312, 0.117, 0.224, 0.149, 0.168, 0.186, 0.09, 0.306,	0.2287	1.09596	-0.3894, 0.8586, 0.3236, -0.9594, 0.0546, -0.4854, 0.8476, -1.0014, -0.2174, -1.7214, 0.3466, -0.6264, 1.7516, 0.8376, -0.8684, 1.3276, 2.2716, 2.0716, 0.6766, -0.5244,
AT5G22700			LOW protein: F-box/FBD/LRR-like protein;(source:Araport11)	501711234,501718900	14576160,16621846	0.23	0.661708	0.0695, 0.2195, -0.0205, 0.1395, -0.2605, 0.3995, 0.6095, 0.6095, -0.5905, -0.5505, 0.7195, 1.4395, -0.3805, 2.1595, 0.3795, 0.0895, -0.0105, -0.0205, -0.0405, -0.3605,	0.1649	0.0672677	0.171, 0.161, 0.102, 0.132, 0.15, 0.106, 0.165, 0.219, 0.16, 0.135, 0.191, 0.212, 0.128, 0.185, 0.163, 0.101, 0.097, 0.202, 0.116, 0.402,	0.7058	1.34731	-0.1979, 1.7871, 1.4601, 2.0971, 1.7981, 1.8331, -0.0569, 0.9621, -0.4499, 1.1941, -0.4109, 0.9971, 0.8881, 1.2051, -0.9249, 2.3741, 1.7241, -2.5949, 1.9251, -1.4939,
AT5G22730			F-box/RNI-like/FBD-like domains-containing protein;(source:Araport11)			0.4395	0.487561	0.3195, 0.1795, 0.2195, 0.4595, -0.1505, 0.0795, 0.2195, -0.8405, -0.2905, 0.7095, 0.8095, 0.9595, 0.7495, 0.9395, 0.7995, 0.3595, 0.8395, 0.5795, 0.7295, 1.1195,	0.2089	0.089918	0.465, 0.315, 0.328, 0.194, 0.209, 0.282, 0.154, 0.106, 0.179, 0.25, 0.118, 0.176, 0.177, 0.136, 0.233, 0.092, 0.129, 0.265, 0.196, 0.174,	0.2954	0.713506	-0.3489, 1.0101, -0.1629, 0.4751, -0.4089, 0.3671, 0.5151, 1.8181, 0.4661, 0.6611, 1.7881, 0.0551, -0.5679, 0.0341, -0.6939, -0.3789, 0.7651, -0.4719, 0.3301, 0.6561,
AT5G25350	EIN3-BINDING F BOX PROTEIN 2 EBF2	EIN3-BINDING F BOX PROTEIN 2 EBF2	Arabidopsis thaliana EIN3-binding F-box protein 2 (EBF2) mRNA. Part of the SCF complex, it is located in the nucleus and is involved in the ethylene-response pathway.	501711622,501711621,501712235,501715038,501719702,501720437,501720951,501721198,501724803,501724803,501732665,501733758,501738422,501761647,501766656,501770132,501773282,501776385,501776375,501779460,501716714,501734478	14675532,14675533,15090654,15784880,16920797,17085683,17307926,17389366,18466304,18466304,18713391,19704846,20647342,25330213,26496607,26496608,27822221,28736168,28739888,29643073,,	-0.26804	0.483635	-0.413333333, 0.056666667, -1.123333333, 0.116666667, -0.663333333, -0.673333333, -0.923333333, -0.963333333, -0.323333333, -0.473333333, -0.923333333, -0.633333333, -0.303333333, 0.316666667, -1.603333333, -0.943333333, -1.013333333, -0.753333333, -0.703333333, 0.956666667, -0.623333333, -0.423333333, -0.433333333, -0.012578947, -0.061578947, 0.009421053, 0.005421053, 0.082421053, 0.056421053, -…	0.204182	0.0932579	0.356, 0.172, 0.41, 0.172, 0.112, 0.135, 0.102, 0.117, 0.122, 0.086, 0.066, 0.12, 0.12, 0.27, 0.219, 0.078, 0.123, 0.081, 0.116, 0.15, 0.084, 0.3, 0.105, 0.211, 0.162, 0.233, 0.229, 0.306, 0.28, 0.119, 0.292, 0.175, 0.347, 0.257, 0.269, 0.309, 0.24, 0.322, 0.318, 0.274, 0.355, 0.193, 0.277, 0.2,	0.59665	1.52869	0.176277778, 1.345277778, -1.012722222, 1.171277778, 1.337277778, 2.609277778, 1.706277778, 1.761277778, 2.869277778, 2.279277778, 1.876277778, 1.503277778, 2.955277778, 1.791277778, 0.061277778, 1.242277778, 2.991277778, 1.776277778, 1.526277778, 2.726277778, 0.201277778, 1.278277778, 2.770277778, 0.340105263, 1.450105263, -0.334894737, -1.234894737, -0.565894737, -0.660894737, 2.140105263, -1.4…
AT5G27750			F-box/FBD-like domains containing protein;(source:Araport11)	501727266,501736447,501748728	18650403,20226671,22589469	-0.426912	0.713769	-0.908125, 0.941875, 0.161875, -0.198125, -0.378125, 2.321875, 0.751875, -0.912105263, -0.812105263, -0.302105263, -0.802105263, -0.722105263, -0.872105263, -0.862105263, -0.912105263, -0.942105263, -0.552105263, -0.232105263, -0.992105263, -1.112105263, 0.327894737, -0.732105263, -0.522105263, -0.682105263, -0.612105263, -0.952105263, -0.392105263, -0.702105263, -1.022105263, -0.792105263, -0.63…	0.1627	0.0662374	0.164, 0.185, 0.187, 0.217, 0.311, 0.298, 0.345, 0.138, 0.127, 0.384, 0.169, 0.111, 0.164, 0.186, 0.149, 0.22, 0.117, 0.099, 0.146, 0.177, 0.163, 0.144, 0.11, 0.127, 0.105, 0.149, 0.116, 0.106, 0.13, 0.164, 0.108, 0.134, 0.139, 0.121, 0.1, 0.12, 0.141, 0.159, 0.112, 0.166,	2.16383	1.00214	0.4223125, 1.7323125, 0.7443125, 1.8003125, -0.9486875, 2.2253125, 3.0073125, 2.313789474, 1.974789474, 0.179789474, 2.432789474, 3.017789474, 2.037789474, 2.020789474, 2.198789474, 0.803789474, 2.749789474, 3.128789474, 1.824789474, 1.681789474, 1.006789474, 1.120789474, 1.414789474, 3.683789474, 3.434789474, 2.093789474, 2.554789474, 2.763789474, 3.472789474, 2.797789474, 2.302789474, 3.3577894…
AT5G35995			F-box/RNI-like superfamily protein;(source:Araport11)			0.055848	0.430526	-0.266153846, -0.006153846, 0.353846154, -0.346153846, 0.573846154, -0.256153846, 0.013846154, 0.993846154, 0.473846154, -0.686153846, -0.626153846, -0.066153846, 0.203846154, 0.003846154, 0.103846154, 0.493846154, -0.206153846, -0.256153846, -0.006153846, 0.623846154,	0.1421	0.0576677	0.13, 0.116, 0.211, 0.175, 0.092, 0.093, 0.117, 0.272, 0.226, 0.103, 0.104, 0.121, 0.087, 0.117, 0.135, 0.126, 0.082, 0.112, 0.159, 0.264,	2.06025	0.852974	3.062846154, 1.712846154, 1.066846154, 1.563846154, 3.603846154, 2.845846154, 1.434846154, 1.022846154, 1.107846154, 2.010846154, 1.972846154, 2.457846154, 1.838846154, 2.616846154, 2.332846154, 2.792846154, 2.400846154, 3.502846154, 0.617846154, 1.238846154,
AT5G37490	PUB21	PUB21	ARM repeat superfamily protein;(source:Araport11)	501712682,501719943,501722879,501722879,501727236	15181213,16972165,17722694,17722694,18664614	-0.0586154	0.409054	-0.604, -0.544, -0.604, -0.704, -0.504, -0.124, -0.054, 0.056, 0.186, 0.046, 0.236, 0.096, -0.074, 0.316, 1.226, -0.034, -0.594, -0.364, -0.614, 0.486, 0.536, -0.574, 0.236, 0.146, -0.024, -0.104, 0.056, -0.114, 0.036, -0.124, 0.316, -0.124, 0.436, 0.296, -0.414, -0.414, -0.024, -0.564, 0.306,	0.148769	0.0325014	0.154, 0.188, 0.123, 0.126, 0.18, 0.203, 0.116, 0.174, 0.095, 0.113, 0.14, 0.13, 0.12, 0.17, 0.14, 0.15, 0.15, 0.18, 0.13, 0.13, 0.16, 0.2, 0.21, 0.12, 0.12, 0.13, 0.14, 0.2, 0.16, 0.22, 0.17, 0.11, 0.15, 0.17, 0.09, 0.12, 0.14, 0.16, 0.12,	0.712731	0.879651	0.1035, 0.3935, -0.5465, -0.1765, 0.4335, 0.4335, 0.8735, 0.3335, 3.0335, 2.5035, 1.0335, 1.1535, 1.2235, -0.1665, 2.8935, 1.1935, 0.7135, 0.9335, -0.0565, 2.1535, 0.6335, 0.2635, 0.6235, 0.4735, 0.8035, 0.5235, 0.5635, -0.0865, 0.4735, -0.7765, 0.8335, 0.3535, 1.7435, 1.1135, 0.3235, 0.1935, 1.5535, -0.9765, 0.7035,
AT5G40140	PUB40	PUB40	RING/U-box superfamily protein with ARM repeat domain-containing protein;(source:Araport11)	501710652,501711234,501711683	12946625,14576160,14657406	-0.083	0.544734	0.2265, -0.3635, 0.0165, -0.1435, -0.0135, -0.0035, -0.1335, -0.2935, -0.3535, -0.0135, 0.4065, 0.0465, -0.2235, -0.1935, -0.0635, -0.0235, 0.1365, -0.0335, 0.1065, 0.0465, -0.9965, -0.3765, -0.6865, -0.9165, -0.0865, -0.6265, -0.8065, 0.2635, -0.2465, -0.9665, -0.2665, 0.3435, -0.7365, 0.1235, 0.1935, 1.9035, 1.2435, 0.3735, -0.5665, 0.3835,	0.15825	0.0673257	0.09, 0.12, 0.11, 0.1, 0.09, 0.17, 0.11, 0.15, 0.07, 0.15, 0.07, 0.09, 0.12, 0.05, 0.16, 0.16, 0.08, 0.14, 0.14, 0.1, 0.2, 0.24, 0.27, 0.15, 0.21, 0.35, 0.18, 0.22, 0.35, 0.15, 0.15, 0.17, 0.18, 0.16, 0.22, 0.18, 0.15, 0.16, 0.24, 0.13,	0.9704	0.933422	2.0827, 0.1737, 2.3877, 1.2407, 1.3097, 1.3577, 1.3657, 1.2147, 1.6237, 2.2887, 2.0907, 1.0177, 0.3707, 1.7447, 1.0807, 1.4157, 0.8907, 1.6807, 1.4587, 1.9957, -0.03375, 0.14625, 0.82625, -0.09375, 0.63625, -0.18375, -0.34375, 2.33625, 0.25625, 0.52625, 0.31625, 0.63625, -1.48375, 0.26625, 0.69625, 1.85625, 2.65625, 0.46625, -0.86375, 1.40625,
AT5G42350	COP9 SIGNALOSOME INTERACTING F-BOX KELCH 1 CFK1	COP9 SIGNALOSOME INTERACTING F-BOX KELCH 1 CFK1	Encodes CFK1 (COP9 INTERACTING F-BOX KELCH 1), a CSN (COP9 signalosome)-interacting F-box protein. CFK1 is a component of a functional ubiquitin ligase complex. CFK1 promotes hypocotyl elongation by increasing cell size.	501719406,501754111	16776300,23475998	-0.2335	0.537323	0.7965, -0.1035, 1.3565, -0.5135, -0.4535, -0.9735, -0.7735, -0.3735, -0.4235, -0.2835, 0.2265, -0.6335, -0.6635, -0.6035, -0.4435, -0.1435, -0.1835, -0.4035, -0.0735, -0.0035,	0.12555	0.0686382	0.122, 0.192, 0.39, 0.126, 0.073, 0.102, 0.146, 0.082, 0.091, 0.088, 0.104, 0.059, 0.145, 0.122, 0.123, 0.101, 0.113, 0.101, 0.11, 0.121,	3.18205	0.669686	3.1579, 3.0819, 3.6409, 3.0409, 3.6999, 1.5359, 1.9869, 4.4179, 3.2729, 3.4209, 4.0169, 3.1479, 2.7969, 3.4739, 3.0399, 2.5199, 2.7499, 3.1189, 3.8849, 3.6359,
AT5G43190			Galactose oxidase/kelch repeat superfamily protein;(source:Araport11)	501683127,501683127,5891,5891,501716464,501718042,501728802,501728927,501729153	11019805,11019805,11077244,11077244,15960624,16299171,18775970,18931141,19000166	0.312343	0.610019	0.89225, -0.26775, 0.05225, 0.19225, 0.85225, -0.19775, 0.59225, 0.31225, 0.25225, 0.75225, -0.13775, -0.48775, -0.22775, -0.24775, -0.04775, 0.20225, 0.26225, -0.21775, -0.01775, 0.17225, -0.29775, 0.36225, 0.56225, -0.16775, -0.37775, 0.03225, -0.13775, -0.25775, -0.08775, 0.20225, 0.33225, -0.35775, 0.02225, 0.21225, -0.08775, 0.24225, 0.07225, -0.15775, 0.03225, -0.15775, 1.344117647, 1.03411…	0.175847	0.0512791	0.133, 0.159, 0.095, 0.166, 0.195, 0.186, 0.164, 0.111, 0.194, 0.172, 0.192, 0.165, 0.146, 0.144, 0.174, 0.336, 0.148, 0.174, 0.083, 0.142, 0.155, 0.16, 0.149, 0.137, 0.178, 0.274, 0.16, 0.139, 0.154, 0.246, 0.167, 0.274, 0.188, 0.17, 0.124, 0.118, 0.113, 0.099, 0.123, 0.223, 0.247, 0.141, 0.227, 0.234, 0.174, 0.239, 0.277, 0.212, 0.241, 0.136, 0.106, 0.182, 0.159, 0.203, 0.15, 0.197, 0.27, 0.185…	1.25944	0.984117	1.032475, 0.022475, 1.106475, 1.070475, 0.467475, 1.053475, 3.173475, 1.283475, 1.024475, 2.459475, 2.271475, 1.244475, 1.738475, 0.973475, -0.477525, -1.400525, 1.962475, 1.401475, 1.423475, 1.238475, 1.026475, 1.791475, -0.387525, 0.773475, -0.107525, -0.936525, 2.040475, 0.817475, 2.243475, 1.619475, 1.737475, 0.085475, 1.496475, 1.910475, 0.492475, 1.852475, 2.101475, 1.418475, 1.732475, 1.18…
AT5G44980			F-box/RNI-like/FBD-like domains-containing protein;(source:Araport11)	501727266	18650403	0.537631	1.78659	-0.117368421, 0.202631579, 4.322631579, -0.657368421, 0.952631579, 0.922631579, 0.852631579, -0.527368421, -0.307368421, -0.057368421, 5.662631579, -0.517368421, -0.467368421, -0.397368421, -0.627368421, -0.437368421, -0.537368421, 3.172631579, -0.847368421, 0.162631579,	0.25235	0.090218	0.153, 0.2, 0.241, 0.262, 0.107, 0.307, 0.364, 0.3, 0.134, 0.176, 0.383, 0.274, 0.201, 0.185, 0.402, 0.275, 0.204, 0.219, 0.43, 0.23,	-1.03631	1.63898	0.107842105, 0.662842105, -2.470157895, -2.673157895, 1.001842105, -1.958157895, -2.410157895, -3.848157895, 0.579842105, -0.785157895, 2.797842105, -0.866157895, -1.340157895, -0.162157895, -2.651157895, -2.001157895, 0.240842105, -0.562157895, -1.498157895, -2.891157895,
AT5G45360	SKP1-INTERACTING PARTNER 31 SKIP31	SKP1-INTERACTING PARTNER 31 SKIP31	Encodes a F-box subunit of the SCF E3 ubiquitin ligase complex that mediates the degradation of 14-3-3 proteins.	501707007,501728802,501774412	12795696,18775970,28189687	-0.076154	0.623406	-0.4405, -0.1305, -0.1305, -0.2805, 0.6495, 0.0295, -0.3305, -0.1505, -0.5305, 0.3895, -0.4605, -0.4005, -0.6605, -0.6905, -0.6105, -0.5705, 0.6895, -0.5205, -0.5005, -0.3705, -0.03, -0.24, -0.55, -0.08, -0.49, -0.02, -0.47, -0.45, 0.07, 0.1, -0.16, -0.02, -0.79, -0.15, -0.27, -0.7, -0.34, -0.02, -0.011578947, -0.671578947, -0.141578947, -0.071578947, 0.008421053, -0.101578947, 0.078421053, 0.048…	0.180667	0.0727304	0.213, 0.173, 0.157, 0.112, 0.199, 0.156, 0.181, 0.227, 0.196, 0.204, 0.133, 0.158, 0.16, 0.156, 0.192, 0.14, 0.144, 0.174, 0.141, 0.163, 0.107, 0.15, 0.196, 0.144, 0.177, 0.099, 0.084, 0.167, 0.133, 0.056, 0.081, 0.068, 0.16, 0.138, 0.142, 0.212, 0.11, 0.113, 0.136, 0.166, 0.304, 0.14, 0.19, 0.168, 0.086, 0.19, 0.275, 0.192, 0.179, 0.145, 0.162, 0.23, 0.121, 0.193, 0.115, 0.204, 0.156, 0.129, 0.…	1.76247	1.38453	2.5466, 2.3506, 2.5656, 2.1686, 2.7786, 1.9136, 2.5936, 2.4256, 2.0326, 2.9346, 2.6856, 0.0836, 0.8466, 1.9636, 2.9616, 1.8546, 4.6336, 3.4036, 2.3036, 2.8916, 2.4535, 0.7505, -0.8355, 1.5505, 1.3945, 2.4505, 1.8805, 0.9435, 1.3475, 2.2915, 2.7465, 2.1515, 2.3775, 2.0115, 2.6395, 0.1915, 0.6245, 2.6545, 2.239473684, -0.633526316, -1.540526316, 2.661473684, 3.604473684, 0.625473684, 1.359473684, 2…
AT5G48170	SLEEPY2 SLY2	SLEEPY2 SLY2;SNEEZY SNE	encodes an F-box protein whose protein sequence is similar to SLY1, which belongs to SCF-SLY1 E3 ligase complex. SCF-SLY1 E3 ligase degrades DELLA proteins that are involved in promoting growth. Overexpression of SLY2 can partially compensate sly1-10 mutant phenotype of dwarfism.	501682861,501706028,501711281,501712394,501713050,501718840,501741197,501742313,501729454	12482876,12724538,14557046,15161962,15308775,16640459,21163960,21455025,	0.3415	0.32429	-0.0205, 0.5195, -0.0205, 0.8395, -0.2905, 0.6995, 0.6295, 0.3195, 0.4595, 0.5795, 0.3295, 0.2995, -0.0005, 0.2395, 0.6095, 0.2895, 0.7095, -0.0605, -0.0205, 0.7195,	0.1654	0.0691013	0.1, 0.174, 0.301, 0.11, 0.117, 0.091, 0.189, 0.165, 0.162, 0.265, 0.113, 0.155, 0.135, 0.192, 0.161, 0.137, 0.151, 0.114, 0.356, 0.12,	-0.6063	1.19283	-0.0379, -0.9409, -1.4359, 0.0731, -0.3619, 1.5141, -0.9079, 0.6091, 1.0601, 1.1201, -1.4699, -2.1449, -1.1379, -0.9429, -1.6569, -0.4529, -2.8289, -0.9589, -2.0029, 0.7781,
AT5G48980			Galactose oxidase/kelch repeat superfamily protein;(source:Araport11)	501680153,501727972	11516153,	-0.0123693	0.515421	-0.337368421, -0.357368421, 0.112631579, -0.007368421, 0.112631579, -0.137368421, 0.162631579, -0.417368421, -0.237368421, -0.087368421, 0.072631579, 0.312631579, 1.852631579, -0.257368421, -0.207368421, -0.047368421, -0.767368421, 0.412631579, -0.167368421, -0.257368421,	0.2436	0.0775788	0.248, 0.131, 0.163, 0.228, 0.344, 0.258, 0.27, 0.151, 0.244, 0.147, 0.22, 0.119, 0.167, 0.298, 0.317, 0.285, 0.314, 0.359, 0.24, 0.369,	-1.24101	1.65934	-1.443157895, -0.987157895, -0.845157895, -0.485157895, -2.414157895, -1.998157895, -2.108157895, -0.482157895, -0.886157895, -0.406157895, -2.198157895, 0.550842105, 3.756842105, -0.018157895, -1.027157895, -1.688157895, -4.388157895, -3.474157895, -2.262157895, -2.016157895,
AT5G48990			encodes an F-box protein that interacts with SKP1 and likely to be involved in ubiquitin-mediated protein degradation.	501680153,501682584,501711234	11516153,12407186,14576160	0.750193	1.0587	2.4495, 0.7695, 4.8495, 2.8195, 0.6395, 0.6295, 0.8595, 1.3195, 0.8195, 0.5395, 1.2295, 0.6295, 5.3195, 1.1895, 0.9995, 0.0495, 0.5195, 0.0695, 0.3295, 0.5595, 1.450789474, -0.409210526, 0.790789474, -0.779210526, -0.459210526, -0.519210526, 0.360789474, 0.190789474, 0.220789474, -0.439210526, 0.390789474, -0.189210526, 0.150789474, -0.159210526, 0.670789474, 0.130789474, 1.000789474, 0.090789474…	0.209767	0.0765204	0.229, 0.232, 0.386, 0.369, 0.153, 0.155, 0.246, 0.159, 0.155, 0.191, 0.353, 0.268, 0.366, 0.133, 0.297, 0.217, 0.189, 0.153, 0.125, 0.13, 0.21, 0.23, 0.24, 0.28, 0.21, 0.3, 0.23, 0.26, 0.22, 0.14, 0.15, 0.32, 0.32, 0.36, 0.14, 0.12, 0.28, 0.19, 0.34, 0.15, 0.19, 0.21, 0.12, 0.12, 0.15, 0.17, 0.13, 0.2, 0.17, 0.13, 0.15, 0.28, 0.12, 0.16, 0.19, 0.14, 0.1, 0.21, 0.15, 0.3,	1.34247	1.4167	0.9781, 0.6961, 4.1331, 1.4191, -0.6399, -0.9929, -0.7739, 1.5221, -0.4929, 1.1731, 1.0781, 0.1881, 3.0601, 1.2021, 0.1651, 0.3591, 0.4481, -0.1229, 1.6321, 1.5591, 0.388684211, -0.571315789, 2.068684211, -1.051315789, -0.291315789, 0.958684211, 1.348684211, 0.238684211, 2.688684211, -0.081315789, -0.111315789, -0.141315789, 1.918684211, 0.038684211, 1.668684211, 0.578684211, 1.348684211, 1.24868…
AT5G49980	AUXIN F-BOX PROTEIN 5 AFB5	AUXIN F-BOX PROTEIN 5 AFB5	auxin F-box protein 5;(source:Araport11)	501719698,501723672,501746303,501742141,501768691,501780378,501734675,501727846	16920877,18166134,21396817,21408147,26976444,29934297,,	0.133327	0.50208	-0.0405, -0.4605, 0.0595, 0.2895, -0.3505, 0.2795, 0.5695, 0.3595, -0.1105, 0.5195, 0.5495, -0.1105, 0.3295, -0.8505, 0.2095, -0.2505, 0.3695, 0.0195, 0.3595, 0.5795, -0.2705, -0.0705, -0.3205, 0.2995, -0.4605, 0.2095, -0.4505, -0.4105, 0.5795, 0.4195, 0.3495, 0.0795, -0.5005, 0.0795, -0.4205, 0.1395, -0.7905, 0.0095, -0.1905, -0.2205, 0.4695, 0.1795, 0.1895, 0.7495, 0.1695, 0.1995, -0.0505, 0.04…	0.142162	0.0472431	0.13, 0.13, 0.07, 0.17, 0.19, 0.12, 0.18, 0.17, 0.17, 0.06, 0.14, 0.14, 0.13, 0.24, 0.12, 0.16, 0.22, 0.15, 0.17, 0.09, 0.1, 0.08, 0.09, 0.14, 0.14, 0.13, 0.13, 0.12, 0.11, 0.2, 0.12, 0.13, 0.12, 0.12, 0.16, 0.15, 0.12, 0.1, 0.1, 0.11, 0.12, 0.11, 0.11, 0.15, 0.14, 0.15, 0.13, 0.17, 0.14, 0.17, 0.28, 0.14, 0.21, 0.13, 0.13, 0.18, 0.12, 0.11, 0.1, 0.15, 0.11, 0.12, 0.16, 0.05, 0.08, 0.11, 0.17, 0.…	1.20781	1.13946	0.992, 1.542, 2.352, 0.692, 0.892, 0.752, 2.242, 1.272, 0.442, 0.742, 2.462, 0.132, 2.632, 1.042, 0.062, 0.562, 4.012, 0.082, 1.612, 1.132, 0.082, 2.182, 1.432, 2.982, 1.382, 1.502, 0.412, 0.362, 3.892, 3.182, 2.702, 0.652, 0.402, 1.722, 0.912, 3.102, 0.672, 1.832, 0.692, 3.082, 1.772, 1.032, -0.838, 4.122, 1.522, 1.842, 1.322, -0.148, 0.522, -0.608, 0.952, -1.658, -0.788, 0.042, 2.602, 1.452, 3.…
AT5G50450			HCP-like superfamily protein with MYND-type zinc finger;(source:Araport11)	501725257,501728802	18671872,18775970	0.303506	0.670324	-0.05425, 0.06575, -0.28425, -0.10425, 0.40575, -0.08425, -0.21425, 0.22575, 0.64575, -0.95425, 0.06575, 0.28575, 0.03575, 0.44575, 0.844117647, 0.344117647, 0.004117647, 1.864117647, 0.264117647, 0.734117647, 0.744117647, -0.535882353, 0.104117647, 1.804117647, -0.355882353, -0.285882353, 0.794117647, 1.694117647,	0.161286	0.0937952	0.111, 0.136, 0.151, 0.153, 0.16, 0.102, 0.069, 0.084, 0.129, 0.148, 0.09, 0.139, 0.188, 0.105, 0.042, 0.097, 0.12, 0.152, 0.176, 0.21, 0.138, 0.123, 0.374, 0.479, 0.15, 0.327, 0.237, 0.126,	1.38376	1.34739	-0.1454, 0.3616, -0.3264, -0.5184, 1.0106, 0.5206, 1.1266, 0.3456, -0.1284, 0.9156, 2.0936, 1.7446, 3.3336, 0.4076, 1.916058824, 4.022058824, 1.730058824, 2.516058824, 1.920058824, 3.818058824, 1.979058824, 3.217058824, -0.236941176, 3.575058824, 1.413058824, -0.163941176, 0.575058824, 1.723058824,
AT5G51380			RNI-like superfamily protein;(source:Araport11)	501711234	14576160	-0.00409132	0.44752	1.155384615, 0.205384615, 0.145384615, 0.305384615, -0.814615385, -0.394615385, 0.145384615, 0.375384615, -0.164615385, 0.155384615, -0.314615385, 0.595384615, -0.384615385, -0.554615385, -0.024615385, -0.154615385, -0.344615385, -0.124615385, 0.115384615,	0.214789	0.0644253	0.306, 0.152, 0.206, 0.312, 0.182, 0.345, 0.201, 0.221, 0.235, 0.262, 0.165, 0.123, 0.311, 0.193, 0.207, 0.197, 0.152, 0.151, 0.16,	1.06635	1.15781	3.622666667, 1.162666667, 0.909666667, 1.333666667, -0.681333333, -1.507333333, 0.061666667, 0.579666667, 1.148666667, 2.223666667, 1.198666667, 2.885666667, 1.264666667, 0.745666667, 1.669666667, 1.431666667, 0.887666667, -0.006333333, 1.329666667,
AT5G52120	PHLOEM PROTEIN 2-A14 PP2-A14	PHLOEM PROTEIN 2-A14 AtPP2-A14;PHLOEM PROTEIN 2-A14 PP2-A14	phloem protein 2-A14;(source:Araport11)	501682470,501682998,501707007,501714842,501776308	12446138,12529520,12795696,15546358,28724081	0.0741683	0.303735	0.122666667, 0.142666667, 0.562666667, -0.407333333, 0.192666667, -0.277333333, -0.017333333, 0.042666667, -0.347333333, -0.037333333, 0.352666667, -0.157333333, 0.012666667, -0.107333333, 0.232666667, 0.762666667, 0.322666667, -0.057333333, -0.237333333, 0.382666667,	0.1336	0.0343471	0.172, 0.132, 0.145, 0.097, 0.094, 0.181, 0.083, 0.084, 0.156, 0.124, 0.126, 0.145, 0.19, 0.151, 0.137, 0.192, 0.133, 0.139, 0.093, 0.098,	0.29295	0.705269	-0.3793, 0.0287, -0.2763, 0.7367, 0.1877, 1.4117, 0.6847, 1.0517, 0.4067, 0.7707, 0.4107, 0.3537, 0.5887, -0.6633, -0.0073, -1.0343, 1.4507, -0.9803, 0.2417, 0.8757,
AT5G52880			F-box family protein;(source:Araport11)			0.473563	0.955648	-0.165882353, 0.844117647, 0.844117647, 0.274117647, 1.184117647, 0.464117647, 0.214117647, 2.464117647, 2.704117647, -0.325882353, 1.294117647, -0.835882353, 0.274117647, -0.025882353, -0.485882353, -0.385882353, 0.214117647, -0.025882353,	0.252944	0.0894253	0.278, 0.268, 0.232, 0.123, 0.25, 0.233, 0.35, 0.433, 0.397, 0.303, 0.3, 0.235, 0.293, 0.117, 0.109, 0.177, 0.258, 0.197,	1.68767	1.39229	0.598058824, 1.690058824, 1.662058824, 1.287058824, 3.854058824, 2.195058824, 0.982058824, 5.307058824, 2.781058824, 1.459058824, 2.210058824, -0.355941176, 0.915058824, 2.445058824, 1.318058824, 1.437058824, 1.326058824, -0.732941176,
AT5G56180	ACTIN-RELATED PROTEIN 8 ARP8	ACTIN-RELATED PROTEIN 8 ATARP8; ARP8;ACTIN-RELATED PROTEIN 8 ARP8	encodes a protein whose sequence is similar to actin-related proteins (ARPs) in other organisms. Member of nuclear ARP family of genes.	1547389,501681836,501717265,501724619,501727266,501728802	11891255,12169662,15063870,18385164,18650403,18775970	0.0303735	0.41578	1.432, 0.222, 0.032, -0.328, 0.052, -0.088, -0.388, -0.468, -0.428, -0.248, -0.288, -0.158, -0.048, -0.028, -0.258, 0.632, -0.618, -0.248, -0.178, 0.322, 0.722, 0.222, -0.468, 0.332, -0.128, -0.328, -0.298, -0.008, 0.092, -0.318, 0.052, 0.202, -0.238, -0.258, -0.148, 0.332, -0.198, 0.012, 0.442, 0.462, 0.934117647, -0.285882353, 0.764117647, -0.275882353, 0.484117647, 0.574117647, 0.054117647, -0…	0.158327	0.0600979	0.386, 0.144, 0.231, 0.186, 0.126, 0.215, 0.237, 0.159, 0.246, 0.296, 0.11, 0.177, 0.194, 0.084, 0.238, 0.236, 0.147, 0.108, 0.144, 0.128, 0.153, 0.11, 0.132, 0.242, 0.18, 0.113, 0.142, 0.137, 0.068, 0.123, 0.136, 0.153, 0.185, 0.147, 0.088, 0.155, 0.119, 0.094, 0.117, 0.106, 0.085, 0.241, 0.157, 0.181, 0.098, 0.175, 0.122, 0.156, 0.127, 0.101, 0.179, 0.119,	0.965283	1.06575	-1.5881, 1.1099, -1.5751, 1.1719, -0.8021, 1.1639, 0.3929, 0.0109, 0.6549, -0.5681, 1.0969, -1.2071, 1.4249, 0.8899, 1.1959, 1.1969, 0.5599, 2.2829, -1.9971, 1.9469, 2.0819, 2.1989, 1.7309, 0.3559, 1.2839, 1.3499, 0.6389, 1.2689, 1.8829, 0.7729, 1.6179, 1.2689, 1.2639, 1.1579, -0.5251, 1.4499, 1.4969, -0.1101, 1.6719, 0.7789, 1.176058824, 0.283058824, 1.681058824, 0.821058824, 2.021058824, 1.9370…
AT5G56370			F-box/RNI-like/FBD-like domains-containing protein;(source:Araport11)	501682584	12407186	0.099434	0.581339	-0.157368421, -0.007368421, -0.377368421, -0.167368421, -0.447368421, -0.547368421, -0.057368421, -0.557368421, -0.377368421, -0.267368421, 0.172631579, -0.117368421, -0.387368421, -0.177368421, -0.697368421, -0.027368421, -0.447368421, -0.437368421, -0.337368421, -0.087368421, 0.110789474, 0.760789474, 0.160789474, 0.330789474, -0.179210526, 0.960789474, -0.619210526, 0.650789474, 0.850789474, 0…	0.19863	0.0713602	0.159, 0.209, 0.308, 0.189, 0.239, 0.183, 0.193, 0.259, 0.197, 0.249, 0.296, 0.153, 0.286, 0.211, 0.284, 0.302, 0.14, 0.194, 0.199, 0.216, 0.24, 0.1, 0.19, 0.1, 0.15, 0.09, 0.13, 0.14, 0.16, 0.08, 0.12, 0.14, 0.16, 0.14, 0.21, 0.18, 0.16, 0.16, 0.15, 0.21, 0.18, 0.11, 0.11, 0.27, 0.2, 0.35, 0.37, 0.26, 0.15, 0.23, 0.39, 0.29, 0.18, 0.16,	0.565391	2.08374	-0.965157895, -0.858157895, -4.928157895, -0.643157895, -2.851157895, -1.887157895, -0.815157895, -2.729157895, -0.522157895, -1.309157895, -2.926157895, 0.316842105, -0.124157895, 0.142842105, -3.848157895, -1.331157895, -0.322157895, -1.370157895, -1.212157895, -1.331157895, 1.438684211, 2.368684211, 1.488684211, 2.748684211, 1.428684211, 2.938684211, 1.748684211, 2.778684211, 6.128684211, 1.77…
AT5G56420			F-box/RNI-like/FBD-like domains-containing protein;(source:Araport11)			0.561426	0.699325	1.382, -0.358, -0.028, 0.382, 0.722, -0.138, -0.038, 0.212, 2.652, 0.482, 2.052, 3.102, 1.342, 1.172, 0.182, 0.362, 0.432, 1.892, 0.652, 0.642, -0.446111111, 0.823888889, 0.333888889, 0.853888889, 0.403888889, 0.923888889, -0.226111111, -0.226111111, 0.733888889, 0.343888889, 0.163888889, 0.853888889, 1.083888889, 0.133888889, 0.313888889, 0.653888889, 0.383888889, 0.883888889, 0.573888889, 0.373…	0.2162	0.0697754	0.217, 0.272, 0.175, 0.076, 0.126, 0.212, 0.155, 0.145, 0.225, 0.097, 0.175, 0.272, 0.209, 0.132, 0.123, 0.136, 0.164, 0.186, 0.148, 0.081, 0.235, 0.218, 0.175, 0.192, 0.232, 0.191, 0.399, 0.35, 0.17, 0.238, 0.309, 0.212, 0.126, 0.22, 0.304, 0.232, 0.261, 0.155, 0.208, 0.221, 0.27, 0.124, 0.202, 0.168, 0.21, 0.287, 0.302, 0.285, 0.243, 0.225, 0.29, 0.191, 0.261, 0.236, 0.211, 0.21, 0.28, 0.36, 0.…	0.960246	1.2027	-0.0834, -1.5194, -0.6744, 0.3016, -0.7554, -1.2114, -0.5524, 0.7486, 2.0816, 0.7436, 1.1036, 1.9546, 2.0476, 1.6596, 0.7566, 1.3596, 0.1026, 1.2416, 0.5086, 0.9326, 0.948444444, 3.695444444, 2.445444444, 2.672444444, 2.100444444, 2.606444444, 0.461444444, -0.057555556, 2.375444444, 0.951444444, -0.716555556, 1.637444444, 0.328444444, 1.837444444, 1.722444444, 3.050444444, 0.674444444, 2.39244444…
AT5G56700			FBD / Leucine Rich Repeat domains containing protein;(source:Araport11)			-0.173807	0.449344	0.027368421, -0.712631579, -0.482631579, -0.142631579, -0.242631579, -0.462631579, 0.977368421, -0.312631579, -0.162631579, -0.462631579, -1.032631579, 0.377368421, -0.292631579, -0.162631579, -0.062631579, 0.287368421, -0.092631579,	0.205059	0.102791	0.179, 0.542, 0.201, 0.143, 0.195, 0.145, 0.34, 0.225, 0.164, 0.202, 0.191, 0.186, 0.145, 0.156, 0.235, 0.166, 0.071,	1.15834	1.14204	1.870578947, -1.483421053, -0.421421053, 1.509578947, 1.915578947, 0.908578947, 1.326578947, 2.918578947, 1.321578947, -0.070421053, 1.799578947, 1.330578947, 1.464578947, 1.104578947, -0.264421053, 1.681578947, 2.779578947,
AT5G56810			F-box/RNI-like/FBD-like domains-containing protein;(source:Araport11)	501709563	0	-0.13063	0.825103	-0.022631579, -0.542631579, 0.097368421, 0.317368421, -0.582631579, -0.672631579, -0.442631579, -0.552631579, -0.482631579, -0.322631579, 2.877368421, 0.137368421, 0.917368421, -0.112631579, -0.332631579, -0.132631579, -0.712631579, -0.792631579, -0.762631579, -0.492631579,	0.2323	0.0713731	0.173, 0.313, 0.225, 0.241, 0.336, 0.279, 0.148, 0.263, 0.334, 0.321, 0.109, 0.199, 0.252, 0.19, 0.152, 0.206, 0.266, 0.106, 0.232, 0.301,	1.11858	1.39891	1.825578947, -1.637421053, 1.246578947, -0.628421053, -0.739421053, -0.961421053, 2.691578947, 1.641578947, 2.804578947, 0.722578947, 2.420578947, 2.017578947, 1.217578947, 2.849578947, 2.049578947, 2.829578947, 0.722578947, 0.401578947, 1.348578947, -0.451421053,
AT5G57900	SKP1 INTERACTING PARTNER 1 SKIP1	SKP1 INTERACTING PARTNER 1 SKIP1	F-box protein, interacts with SKP1/ASK1 subunit of SCF ubiquitin ligase in a glucose-dependent manner	1346131,501707007,501712376,501712764,501718569,501727266,501753920	11387208,12795696,15047901,15282545,16463051,18650403,23536609	0.1465	0.342036	-0.0325, -0.0225, -0.3725, -0.4125, -0.3125, -0.0525, 0.1875, -0.1225, -0.2425, 0.7575, 0.3575, 0.3575, 0.7175, 0.4375, 0.1075, 0.5175, 0.3875, 0.3175, 0.1375, 0.2175,	0.16075	0.0442622	0.08, 0.16, 0.185, 0.172, 0.161, 0.155, 0.263, 0.175, 0.208, 0.192, 0.089, 0.18, 0.173, 0.094, 0.17, 0.176, 0.195, 0.099, 0.151, 0.137,	1.8807	1.0387	2.6946, 2.2996, -0.0084, 0.1556, 2.4616, 3.1986, 0.4056, 1.7436, 0.8266, 1.9366, 3.9506, 1.0536, 2.2076, 2.5356, 1.1316, 2.9616, 1.6606, 2.5036, 1.7836, 2.1116,
AT5G60570			Galactose oxidase/kelch repeat superfamily protein;(source:Araport11)	501728802,501741056	18775970,21119043	0.142532	0.521119	0.449333333, 0.839333333, 1.219333333, 0.339333333, 0.069333333, -0.500666667, 0.059333333, -0.210666667, 0.379333333, 0.899333333, 0.079333333, 0.269333333, -0.140666667, 0.249333333, 0.219333333, -0.830666667, -0.160666667, 0.779333333, 0.039333333, 0.559333333, 0.609333333, -0.350666667, -0.280666667, -0.910666667, -0.110666667,	0.18796	0.0534388	0.166, 0.202, 0.299, 0.146, 0.208, 0.114, 0.155, 0.256, 0.132, 0.249, 0.231, 0.191, 0.269, 0.137, 0.222, 0.137, 0.211, 0.276, 0.179, 0.183, 0.136, 0.117, 0.199, 0.136, 0.148,	1.18715	0.872126	1.317066667, 1.384066667, 1.849066667, 1.464066667, 3.459066667, 0.720066667, 1.068066667, 0.463066667, 1.500066667, 2.192066667, 0.261066667, 1.418066667, 1.005066667, 1.179066667, 1.245066667, 1.841066667, 0.513066667, 2.146066667, 1.064066667, 1.258066667, 1.777066667, 0.367066667, 0.879066667, -1.363933333, 0.672066667,
AT5G60610			F-box/RNI-like superfamily protein;(source:Araport11)			0.431193	0.887854	1.0595, 1.4095, 1.6595, 2.0895, 0.4995, 0.6995, 0.2895, 1.2495, 0.7095, 0.9395, 1.8195, 0.6495, 1.1095, 0.8695, 4.8595, 0.5495, -0.3705, 0.3195, 2.1995, 0.6095, 0.810789474, 1.280789474, -0.379210526, 0.320789474, 0.180789474, -0.829210526, 0.660789474, 0.080789474, -0.269210526, -0.349210526, -0.209210526, 0.390789474, -0.099210526, 0.570789474, 0.140789474, 0.110789474, 0.060789474, 0.520789474…	0.201633	0.0788936	0.295, 0.283, 0.175, 0.122, 0.26, 0.154, 0.237, 0.202, 0.266, 0.202, 0.15, 0.19, 0.172, 0.253, 0.526, 0.299, 0.171, 0.195, 0.134, 0.132, 0.14, 0.2, 0.11, 0.19, 0.17, 0.2, 0.15, 0.15, 0.14, 0.16, 0.15, 0.29, 0.25, 0.2, 0.12, 0.11, 0.11, 0.13, 0.22, 0.2, 0.2, 0.14, 0.16, 0.13, 0.14, 0.18, 0.22, 0.11, 0.25, 0.23, 0.4, 0.25, 0.14, 0.21, 0.28, 0.43, 0.22, 0.23, 0.14, 0.23,	1.10852	1.36089	1.8311, -0.2689, 1.3851, 0.7831, 1.1331, 2.0781, 1.2081, -0.7429, 0.2961, 0.6641, 1.8481, 1.3361, 0.3321, -1.3369, 4.5321, 0.2011, -0.4099, -1.0919, 1.2171, 1.0291, 3.598684211, 2.698684211, 0.898684211, 2.268684211, 1.438684211, 0.728684211, 2.798684211, 2.148684211, 2.128684211, 2.538684211, 2.028684211, 2.228684211, 2.238684211, 0.158684211, 1.428684211, 1.708684211, 2.388684211, 3.188684211, …
AT5G61560	PUB51	PUB51	U-box domain-containing protein kinase family protein;(source:Araport11)	501683545,501712936,501719212,501720929,501724486,501742526,501756979	12644671,15235117,16843620,17317660,18431481,21477822,24023856	-0.351323	0.572764	-0.6165, -0.1865, -0.7665, 0.7035, -0.6165, -0.8365, -0.5265, -1.0165, -1.2765, -0.7165, 0.148974, 0.218974, -0.51103, 0.458974, 0.358974, -0.44103,	0.12675	0.0382788	0.12, 0.07, 0.11, 0.11, 0.15, 0.13, 0.14, 0.08, 0.09, 0.16, 0.147, 0.175, 0.096, 0.08, 0.177, 0.193,	1.45188	0.868145	0.71625, 2.01625, 1.51625, 3.31625, 1.65625, -0.13375, 2.06625, 1.08625, 1.00625, 0.22625, 1.764103, 1.625103, 0.455103, 1.846103, 1.684103, 2.383103,
AT5G62560	PUB41	PUB41	RING/U-box superfamily protein with ARM repeat domain-containing protein;(source:Araport11)	501710652	12946625	0.376473	0.386305	0.558974, -0.11103, 0.088974, -0.10103, 0.078974, 0.348974, -0.07103, 0.418974, 0.488974, 0.098974, 0.588974, 1.158974, 0.718974, 0.668974, -0.00103, 0.688974, 0.188974, 1.048974, 0.708974, -0.04103,	0.1669	0.0580797	0.128, 0.255, 0.149, 0.132, 0.2, 0.111, 0.124, 0.109, 0.134, 0.251, 0.257, 0.121, 0.089, 0.225, 0.175, 0.233, 0.114, 0.247, 0.118, 0.166,	0.820603	0.727954	1.462103, -0.7299, 1.488103, 1.559103, 0.359103, 1.321103, 1.823103, 0.621103, -0.2459, 0.149103, 1.209103, 1.741103, 0.786103, 0.497103, 1.242103, -0.2709, 1.478103, 0.841103, 0.767103, 0.314103,
AT5G62970			Protein with RNI-like/FBD-like domain;(source:Araport11)	501727972	0	0.14	0.327935	0.234, 0.604, 0.344, -0.066, 0.684, 0.154, -0.116, 0.054, 0.304, 0.214, 0.264, -0.076, 0.854, -0.126, 0.064, 0.094, -0.296, 0.224, -0.516, -0.096,	0.125	0.0362941	0.164, 0.194, 0.13, 0.145, 0.131, 0.129, 0.135, 0.117, 0.082, 0.076, 0.183, 0.164, 0.128, 0.059, 0.147, 0.1, 0.099, 0.075, 0.133, 0.109,	1.10435	0.948098	1.3887, -0.8523, 1.7517, 1.0627, -0.7473, 1.9217, 1.2647, -0.0033, 1.6687, 1.6547, 1.0837, -0.2173, 2.6837, 1.3167, 1.1147, 2.3867, 0.9347, 0.6277, 1.1767, 1.8697,
AT5G64660	CYS, MET, PRO, AND GLY PROTEIN 2 CMPG2	ATCMPG2;"CYS, MET, PRO, AND GLY PROTEIN 2" CMPG2, PUB27	CYS, MET, PRO, and GLY protein 2;(source:Araport11)	501681503,501710652,501714511,501721149,501722879,501722879,501727236,501728802	12084942,12946625,15634198,17337630,17722694,17722694,18664614,18775970	0.14875	0.45104	1.876, 0.446, -0.204, 0.976, 0.046, -0.334, 0.216, 0.276, 0.256, -0.334, 0.146, -0.364, -0.214, 0.096, 0.056, -0.244, 0.406, 0.026, 0.226, -0.074, 0.2265, -0.0635, -0.3635, 0.4465, -0.4135, 0.0665, 0.4265, -0.5735, -0.0835, 0.0365, 0.4665, -0.2935, 0.4365, -0.1435, 0.6665, 0.6065, 0.2865, 0.0965, 0.0065, 0.8365,	0.17275	0.0520841	0.1, 0.16, 0.26, 0.23, 0.15, 0.13, 0.25, 0.12, 0.14, 0.14, 0.12, 0.18, 0.15, 0.15, 0.11, 0.14, 0.17, 0.13, 0.12, 0.12, 0.27, 0.19, 0.19, 0.15, 0.15, 0.13, 0.13, 0.16, 0.09, 0.27, 0.28, 0.21, 0.21, 0.17, 0.18, 0.24, 0.17, 0.26, 0.22, 0.17,	0.79835	1.03465	2.3935, 1.3335, 0.0235, 1.8235, 1.2735, -0.2165, 0.8635, 2.9835, 1.9835, 1.3335, -0.1965, 0.1135, 0.5935, 1.1835, 1.7035, 0.9935, 0.3435, 0.0835, 0.4935, 0.2735, -0.5243, -0.2023, -1.1783, 2.8087, 0.9237, 0.6777, 1.8997, 0.4337, 0.1827, -1.5353, 1.2117, -0.3093, 0.7337, -0.1333, 0.8177, 2.4727, 2.4377, 0.2767, 0.8657, 0.6947,
AT5G65200	PLANT U-BOX 38 PUB38	PLANT U-BOX 38 PUB38;ARABIDOPSIS THALIANA PLANT U-BOX 38 ATPUB38	Encodes a protein containing a U-box and an ARM domain. This protein has E3 ubiquitin ligase activity based on in vitro assays.	501710652,501711683,501725140	12946625,14657406,18552232	-0.246318	0.247217	-0.1045, 0.2455, -0.1245, -0.4245, -0.4145, -0.6045, -0.3645, -0.2345, -0.3445, 0.0655, -0.4045,	0.139636	0.050747	0.089, 0.073, 0.122, 0.247, 0.118, 0.186, 0.099, 0.169, 0.169, 0.112, 0.152,	1.1664	0.866391	1.1994, 3.0944, 0.9424, 1.2704, 1.2514, 0.6144, 0.6244, -0.1136, 0.6264, 1.0674, 2.2534,
AT5G65500	PUB50	PUB50	U-box domain-containing protein kinase family protein;(source:Araport11)			0.134973	0.395893	0.168974, 0.068974, -0.35103, -0.33103, 0.018974, 0.448974, 0.048974, -0.08103, -0.44103, 0.258974, 0.488974, -0.26103, 0.068974, 0.328974, 0.118974, -0.06103, 0.478974, -0.17103, 0.718974, 1.178974,	0.1785	0.0377003	0.208, 0.173, 0.15, 0.218, 0.153, 0.209, 0.126, 0.189, 0.153, 0.146, 0.156, 0.134, 0.211, 0.187, 0.263, 0.214, 0.172, 0.211, 0.112, 0.185,	0.556552	0.920438	0.404103, 0.269103, 1.266103, -1.2019, -0.1779, 0.798103, 1.535103, 0.876103, -0.2039, 0.633103, -1.0269, 1.353103, 0.155103, 0.826103, 0.376103, -0.3209, 0.000103, 2.463103, 1.700103, 1.407103,
AT5G65850			F-box and associated interaction domains-containing protein;(source:Araport11)	501727266	18650403	0.342344	0.448686	1.44475, 1.04475, 0.51475, 0.17475, 0.72475, 0.49475, 0.31475, 0.92475, 0.53475, 0.45475, 0.07475, 0.37475, 0.65475, 0.55475, 0.00475, 0.71475, 0.05475, 0.16475, 0.75475, 0.73475, 0.210333333, -0.169666667, 0.090333333, 0.050333333, -0.639666667, 0.310333333, 0.010333333, -0.249666667, -0.399666667,	0.143966	0.0453742	0.176, 0.086, 0.185, 0.126, 0.108, 0.167, 0.206, 0.161, 0.101, 0.139, 0.126, 0.117, 0.259, 0.234, 0.117, 0.103, 0.126, 0.131, 0.109, 0.085, 0.141, 0.108, 0.222, 0.125, 0.15, 0.19, 0.112, 0.099, 0.166,	1.23801	0.829902	1.710525, 1.457525, 1.466525, 1.403525, 1.758525, 0.545525, 0.614525, 1.688525, 1.879525, 1.378525, 1.880525, 0.494525, -0.984475, 1.348525, 1.333525, 1.275525, 1.227525, 1.427525, 2.864525, 1.750525, 1.532966667, 0.851966667, 2.155966667, 1.071966667, -0.041033333, -0.603033333, 2.070966667, 0.317966667, 2.022966667,
AT5G65920	PUB31	PUB31	ARM repeat superfamily protein;(source:Araport11)	501710652,501712404,501727236,501776707	12946625,15159628,18664614,28865087	0.1475	0.486836	0.5865, 0.2765, -0.1135, -0.1235, 0.3165, -0.2035, 0.1565, -0.5835, -0.3335, -0.4635, -0.5035, 0.2565, 0.0765, -0.2835, 0.6865, 0.3765, 1.1665, 0.5765, 0.6065, 0.6265, 0.0065, -0.2435, -0.1435, 0.4065, -0.2635, -0.2035, -0.2035, -0.2835, -0.6235, -0.1335, 0.4065, 0.6265, 0.3765, 0.3065, -0.1535, 0.2265, 1.7865, 0.0365, 0.5665, 0.3065,	0.154	0.051231	0.14, 0.17, 0.12, 0.14, 0.09, 0.15, 0.16, 0.25, 0.26, 0.17, 0.1, 0.22, 0.11, 0.12, 0.18, 0.09, 0.1, 0.3, 0.15, 0.17, 0.11, 0.12, 0.1, 0.18, 0.11, 0.14, 0.13, 0.19, 0.2, 0.14, 0.17, 0.13, 0.15, 0.08, 0.17, 0.09, 0.21, 0.15, 0.25, 0.15,	1.33668	0.851157	1.1387, 0.5397, 0.8957, 1.5277, 3.0677, 2.1347, 1.4997, 0.1057, -0.5853, -1.0143, 1.2797, 1.6927, 1.0397, 1.5357, 2.2967, 2.2937, 1.9837, 1.6477, 1.9947, 2.3917, 0.7687, 0.9457, 2.1547, 1.0187, 1.8897, 2.5247, 0.6707, 1.2137, 0.4447, 0.1527, 1.5367, 2.0967, 1.5917, 1.7907, 0.1987, 1.6317, 0.8547, 1.2697, 1.1207, 2.1257,
AT5G67250	SKP1/ASK1-INTERACTING PROTEIN 2 SKIP2	SKP1/ASK1-INTERACTING PROTEIN 2 SKIP2;VIER F-BOX PROTEINE 4 VFB4	Encodes an SKP1 interacting partner (SKIP2).Encodes an F-box protein. Based on genetic analysis appears to be functionally redundant with VFB1,2, and 3. When expression of all 4 genes is reduced plants show defects in growth and reduced expression of auxin response genes.	1346131,501681836,501681836,501710157,501710157,501712682,501721474,501721388,501721388,501724643,501727266,501728802	11387208,12169662,12169662,12912986,12912986,15181213,17408486,17435085,17435085,18375657,18650403,18775970	0.36796	0.986102	1.0495, 1.0395, 0.4595, 4.6895, 0.8995, 0.4295, 0.2795, 0.038421053, -0.941578947, 0.048421053, -0.231578947, 0.308421053, -0.121578947, 0.758421053, 0.448421053, -0.261578947, -0.251578947, 0.518421053, 0.408421053, -0.071578947, 0.568421053, -0.131578947, -0.381578947, 0.528421053, -0.391578947, -0.131578947, 0.378421053,	0.215852	0.0678209	0.158, 0.165, 0.158, 0.15, 0.152, 0.224, 0.161, 0.253, 0.168, 0.254, 0.16, 0.274, 0.332, 0.361, 0.199, 0.279, 0.396, 0.207, 0.254, 0.222, 0.236, 0.13, 0.19, 0.228, 0.168, 0.17, 0.179,	1.57786	0.954949	0.8201, 2.4081, -0.1329, 0.5691, 1.0891, -0.2399, 2.1561, 1.180473684, 2.325473684, 0.539473684, 3.239473684, 1.434473684, 1.290473684, 1.623473684, 2.826473684, 2.043473684, 1.748473684, 2.170473684, 0.098473684, 2.627473684, 2.059473684, 3.094473684, 1.239473684, 1.569473684, 2.051473684, 2.271473684, 0.498473684,
AT5G67340	PUB2	PUB2	ARM repeat superfamily protein;(source:Araport11)	501710652,501727266,501772162,501773628	12946625,18650403,24573467,27986866	0.103	0.4136	0.82, 0.93, 0.71, -0.12, 0.32, 0.28, 0.09, 0.57, 0.29, 0.45, 0.37, 0.02, 0.23, -0.07, -0.12, -0.18, 0.48, -0.24, 0.12, 0.32, -0.104, 0.566, -0.474, -0.254, -0.034, -0.124, -0.204, 0.206, 0.066, -0.324, 0.026, -0.084, -0.354, -0.354, -0.384, -0.314, -0.394, -0.634, -0.474, 0.286, 1.24, 0.88, 0.09, -0.5, -0.27, 0.83, -0.49, 0.86, 0.3, 0.26, 0.26, 0.12, 0.2, 0.45, 0.32, -0.3, -0.14, 0.08, 0.12, -0.04	0.143817	0.0481183	0.142, 0.082, 0.13, 0.116, 0.104, 0.131, 0.104, 0.111, 0.096, 0.092, 0.138, 0.211, 0.119, 0.176, 0.162, 0.225, 0.132, 0.127, 0.163, 0.101, 0.11, 0.21, 0.19, 0.15, 0.16, 0.16, 0.17, 0.17, 0.07, 0.26, 0.14, 0.16, 0.09, 0.1, 0.15, 0.15, 0.11, 0.17, 0.08, 0.07, 0.102, 0.088, 0.1, 0.214, 0.125, 0.226, 0.162, 0.199, 0.107, 0.087, 0.243, 0.252, 0.203, 0.207, 0.108, 0.126, 0.114, 0.188, 0.107, 0.139,	1.02877	0.990623	2.15585, 1.48285, 3.04185, 0.45385, 2.10885, 0.74685, 0.65685, 1.62785, 1.99485, 0.37885, 0.36785, 1.03085, 0.18985, 0.53085, 0.33285, 0.19185, 0.47485, 0.19685, 1.26185, 1.64785, 1.4935, 2.1935, 0.1935, 0.5935, 0.0935, 1.7735, 1.0935, 1.6635, 2.3135, 0.3535, 0.4635, 1.1535, 0.9135, 1.1035, 0.6735, 0.2335, 1.3835, 1.6935, 2.2735, 2.7335, 1.95885, 2.68985, 1.09285, -1.01015, -0.00115, 0.02385, 0.1…
AT5G67530	PLANT U-BOX 49 PUB49	PLANT U-BOX 49 ATPUB49;PLANT U-BOX 49 PUB49	plant U-box 49;(source:Araport11)	501712374,501712366,501712942,501732478,501728802	15047905,15051864,15231834,18393940,18775970	0.0428181	0.391393	-0.10103, 0.208974, 0.618974, -0.52103, -0.50103, -0.22103, 0.138974, 0.388974, 0.008974, 0.868974, 0.418974, 0.228974, 0.058974, 0.248974, 0.258974, -0.17103, -0.07103, -0.16103, 0.458974, 0.178974, -0.03103, -0.53103, 0.308974, -0.69103, -0.18103, 0.388974, -0.00103, -0.11103, -0.28103, -0.13103, -0.10103, 0.408974, -0.96103, -0.10103, -0.22103, -0.07103, 0.758974, 0.338974, 0.538974,	0.152641	0.0494882	0.175, 0.181, 0.112, 0.097, 0.052, 0.156, 0.208, 0.197, 0.109, 0.094, 0.118, 0.167, 0.191, 0.236, 0.214, 0.172, 0.123, 0.1, 0.121, 0.107, 0.237, 0.188, 0.185, 0.151, 0.115, 0.16, 0.16, 0.121, 0.174, 0.169, 0.185, 0.069, 0.117, 0.139, 0.183, 0.164, 0.288, 0.094, 0.124,	0.94141	1.17061	1.682103, 1.518103, 1.412103, 1.684103, 0.814103, -0.7279, -0.1119, -0.8859, 2.682103, 1.305103, 2.715103, 1.233103, 0.865103, 1.174103, -0.6969, 0.248103, -0.1769, 1.595103, 1.475103, 3.009103, -0.1939, 3.022103, -0.2909, 2.020103, 0.901103, 0.510103, 0.818103, 0.546103, -0.5089, 0.641103, -0.8319, 0.981103, -0.2429, 2.878103, 0.657103, -0.4149, 0.512103, 1.581103, 3.317103,

## Sheet: Table S1 - Statistcal Analyses
	Period				Period Split Peaks Low		Period Split Peaks High		Phase
AT#	Mean difference	p-value	Subpopulations?	Subpopulation Division Locaiton	Mean difference	p-value	Mean difference	p-value	Mean difference	p-value
AT1G09650	-0.072721	0.385945	Yes	around 0	-0.61459	4.1119e-18	0.68261	3.8736e-11	1.67407	9.93881e-07
AT1G10780	-0.232428	0.0578871	No						2.00444	5.92168e-06
AT1G11620	0.474375	0.297274	No						0.574313	0.432718
AT1G12710	0.138444	0.199632	No						1.80377	0.000244273
AT1G12820	0.318277	0.0142419	Yes	around 1	0.0759076	0.355363	1.4332	0.0002773	0.366404	9.88236e-05
AT1G13570	0.2245	0.00283629	No						1.0357	0.77912
AT1G14330	0.425643	0.0844798	No						2.75308	5.77988e-08
AT1G15670	-0.212909	0.00555634	No						0.802382	0.0595656
AT1G15680	0.541055	1.64258e-15	No						0.462823	3.7553e-05
AT1G16250	0.475167	0.00538125	No						0.448733	0.0316745
AT1G19070	0.522125	1.33436e-09	No						1.12786	0.860545
AT1G19160	0.0406877	0.090151	No						0.403839	0.0147305
AT1G19460	0.277825	0.000834247	No						1.20448	0.419399
AT1G20800	1.01647	2.69879e-06	No						-0.112176	1.43528e-10
AT1G20940	0.25075	0.0115956	No						1.16861	0.680283
AT1G21410	-0.1995	0.0141614	No						1.74555	0.00543185
AT1G21760	0.0715833	0.308213	No						0.0255167	7.49968e-09
AT1G22040	0.1245	0.00576026	No						0.993117	0.16558
AT1G22220	0.588276	2.02696e-10	No						0.733129	0.015312
AT1G23780	0.3815	0.000310173	No						2.36765	3.34958e-05
AT1G26930	0.86225	9.18863e-06	No						1.39282	0.256467
AT1G27340	0.160742	0.510657	No						1.74643	0.066469
AT1G27420	-0.107375	0.137367	No						1.40814	0.0300824
AT1G30090	-0.0896667	0.3061	No						1.21093	0.612518
AT1G30200	0.080875	0.0846135	No						1.11201	0.949926
AT1G30950	-0.284333	0.00128487	No						2.25798	2.41127e-08
AT1G31000	-0.033	0.819523	No						1.73605	0.000215095
AT1G31080	-0.35043	0.000340989	No						1.53114	0.040026
AT1G31350	-0.136746	0.0806506	No						1.06075	0.810312
AT1G32020	0.682579	5.0876e-05	No						2.73742	3.38482e-05
AT1G32375	0.750968	1.12082e-05	No						1.31859	0.277175
AT1G32430	-0.2995	0.570892	No						-0.062625	0.433045
AT1G47056	0.0163698	0.852366	No						1.6904	0.00501493
AT1G47270	0.125301	0.238334	No						1.27172	0.101106
AT1G47730	-0.21475	0.00156109	No						1.23695	0.534005
AT1G47790	-0.04375	0.609825	No						1.56102	0.0194602
AT1G47810	0.0286328	0.855782	No						0.564669	0.118793
AT1G50870	0.567759	6.03841e-07	Yes	around 2	0.36156	2.2737e-09	2.836	9.0942e-05	0.92773	0.293981
AT1G51320	-0.293778	7.16515e-05	No						0.936389	0.31875
AT1G51370	-0.125529	0.343264	No						1.7161	0.0134516
AT1G51550	-0.0827404	0.19603	No						1.54694	0.0144042
AT1G53320	0.368	7.13484e-06	No						0.978675	0.491485
AT1G53790	0.075	0.46071	No						1.13303	0.851466
AT1G54550	-0.22225	0.00943408	No						1.28443	0.403921
AT1G55000	0.501417	0.00589781	No						2.32709	2.48523e-08
AT1G55030	-0.081498	0.26431	No						1.5242	0.022942
AT1G55270	0.242039	0.00587728	No						0.706062	0.0963409
AT1G59680	-0.1285	0.217932	No						1.77349	0.0044289
AT1G60400	0.19925	0.034088	No						2.63475	5.90656e-05
AT1G60570	-0.0353846	0.540833	No						1.37197	0.0944758
AT1G61330	0.446246	0.00085595	No						1.88054	0.0187576
AT1G63090	0.377042	0.000299528	No						1.51268	0.0148715
AT1G65740	0.955	2.03564e-08	No						0.795425	0.0698196
AT1G67190	-0.0541538	0.402723	No						1.8862	0.00024474
AT1G74510	0.052	0.706991	No						1.0749	0.903365
AT1G76920	-0.763333	1.85639e-09	No						1.27728	0.428278
AT1G77000	0.43925	3.64938e-05	No						1.20158	0.554372
AT1G78100	0.401114	0.00017415	No						0.385489	0.00058521
AT1G78280	0.340167	0.00341335	No						-0.183292	4.02571e-07
AT1G78750	-0.149875	0.0209132	No						1.01434	0.55723
AT1G78760	-0.0286219	0.832544	No						1.38439	0.198147
AT1G80110	0.19225	0.051154	No						1.05445	0.850914
AT1G80440	0.0835	0.317148	No						1.2398	0.422183
AT1G80570	0.215833	0.0209568	No						1.33663	0.279635
AT1G80960	-0.20225	0.118307	No						1.46447	0.13386
AT2G01620	-0.0532967	0.502976	No						2.52249	3.83997e-06
AT2G02300	0.176085	0.0272031	No						1.12514	0.902821
AT2G02340	0.39575	1.3511e-06	No						0.13925	8.16686e-09
AT2G02350	0.50725	3.89307e-07	No						1.09154	0.942026
AT2G02360	0.5125	6.43641e-11	No						0.04605	8.77028e-07
AT2G02870	-0.1875	0.00245182	No						1.43615	0.00829706
AT2G17030	0.14375	0.37319	No						1.82237	0.0030387
AT2G18280	0.188875	0.00163384	No						1.51526	0.00117221
AT2G18780	0.37275	0.000246963	No						0.51905	0.00110333
AT2G21680	0.55125	9.52235e-05	No						1.79267	0.0145518
AT2G22030	-0.3055	0.0371528	No						2.00685	0.0020456
AT2G24540	0.0799583	0.506473	No						0.502504	0.0175417
AT2G26030	0.420875	0.000159475	No						1.51141	0.00677634
AT2G29770	0.098125	0.412074	No						1.84469	1.49072e-05
AT2G29910	-0.037002	0.592208	No						1.32038	0.363737
AT2G32560	0.0268989	0.591703	No						1.80934	4.37654e-06
AT2G36090	-0.0403483	0.630467	No						1.16154	0.604747
AT2G39490	-0.322167	0.0278299	No						1.39251	0.236123
AT2G40920	0.229	0.0869724	No						1.0922	0.966863
AT2G41170	0.05825	0.692629	No						1.827	0.000624463
AT2G44030	0.5985	0.0101116	Yes	around 3	0.202611	0.11563	4.1615	3.1917e-05	1.71692	0.000661029
AT2G44130	0.270617	0.000770951	No						1.38023	0.0661517
AT2G44630	-0.06725	0.257233	No						-0.023525	0.000533287
AT2G44700	0.754545	0.00499508	Yes	around 1.5	0.19417	0.030023	3.8926	0.00042388	0.513322	0.0663272
AT3G03030	-0.104375	0.118479	No						1.41189	0.113985
AT3G03360	-0.245125	0.010674	No						-0.471187	2.90381e-07
AT3G06380	-0.00805178	0.86643	No						1.20077	0.612957
AT3G06570	0.0170086	0.744898	No						1.6158	3.15105e-07
AT3G07550	0.0828148	0.333831	No						1.25802	0.244063
AT3G07870	0.21175	0.00773881	No						1.10347	0.996975
AT3G08750	0.61025	2.05863e-07	No						0.5892	0.0121067
AT3G12350	-0.343396	0.00359264	No						2.01466	2.04761e-08
AT3G16740	0.374219	2.46531e-07	No						0.254038	0.000120482
AT3G17710	-0.036	0.737551	No						0.5417	0.0252842
AT3G18910	0.854016	8.82882e-05	No						1.78783	0.00501687
AT3G18980	-0.0546795	0.207748	No						0.584638	1.29281e-05
AT3G21410	0.2785	0.00165721	No						1.60915	0.000445559
AT3G22350	0.24625	0.0387416	No						0.48515	0.0389922
AT3G23880	0.1395	0.0230553	No						1.15058	0.72448
AT3G24760	0.216199	0.000155169	No						1.42629	0.0479793
AT3G26000	0.140256	0.0418725	No						0.283462	0.090408
AT3G26920	-0.0131427	0.857791	No						1.45711	0.14693
AT3G27150	0.192635	0.0101146	No						0.892567	0.356651
AT3G49480	-0.0960193	0.375396	No						1.36218	0.0710148
AT3G50080	0.249823	0.00140534	No						1.56377	0.000468252
AT3G52680	0.249109	0.00141837	No						1.77111	0.000572948
AT3G53000	0.146667	0.138752	No						0.42635	0.0168418
AT3G54480	0.333	0.0243428	No						0.7887	0.294173
AT3G54650	-0.00713158	0.949853	No						0.547059	0.00642875
AT3G58880	0.365	0.000291389	No						0.25365	0.0047035
AT3G58900	0.278	0.108061	No						1.1325	0.897686
AT3G58930	0.2565	0.0262068	No						1.23085	0.685792
AT3G59000	-0.712833	7.16843e-08	No						0.923028	0.532155
AT3G59150	1.29693	3.93835e-09	Yes	around 3	0.67979	1.7538e-09	3.9338	2.8671e-10	1.14985	0.840163
AT3G59210	-0.124524	0.36745	No						2.20672	0.014478
AT3G59940	-0.0642257	0.473084	No						1.50963	0.00114429
AT3G61060	0.629493	4.88845e-10	No						0.193932	1.0545e-13
AT3G61590	0.17746	0.0154908	No						0.366125	2.33461e-06
AT3G62980	-0.143	0.249847	No						1.8403	0.0168813
AT3G63220	-0.0575	0.68649	No						1.51485	0.196801
AT4G00755	-0.12251	0.0531442	No						0.488877	0.017566
AT4G02440	0.375809	4.95702e-07	No						0.401121	2.5795e-11
AT4G02740	0.122368	0.277233	No						0.769746	0.357256
AT4G03190	0.191667	0.0800707	No						0.975667	0.386079
AT4G05470	0.27625	0.00417531	No						0.98055	0.448684
AT4G08980	0.444626	2.98073e-06	No						0.892003	0.0909958
AT4G09920	0.14975	0.0682646	No						1.88087	8.36713e-05
AT4G10400	0.86675	0.000790983	No						1.41822	0.190579
AT4G14096	0.311313	0.00343652	No						2.29842	2.4145e-07
AT4G14905	0.372885	0.0236551	No						1.13804	0.946908
AT4G15475	0.387821	0.00169646	No						1.77183	0.0108384
AT4G19870	-0.142222	0.0939224	No						1.24835	0.488597
AT4G21240	0.00242628	0.970658	No						1.15382	0.626332
AT4G22390	-0.0246154	0.721444	No						0.241567	0.0239488
AT4G29370	0.547298	8.47513e-15	No						0.730253	0.00439268
AT4G29420	-0.043207	0.599829	No						1.59405	0.00111461
AT4G33210	-0.214	0.0023853	No						1.48055	0.0739235
AT4G39550	0.163875	0.0620158	No						1.00204	0.616266
AT4G39560	0.762	3.31917e-06	No						0.647	0.0139956
AT4G39570	0.302649	0.000348802	No						0.457668	1.14913e-05
AT4G39580	-0.2955	0.033235	No						2.6588	4.19239e-10
AT4G39600	0.375	0.00173086	No						-0.1854	0.000199093
AT5G01720	-0.0395021	0.63639	No						1.12303	0.912174
AT5G03020	0.331145	0.00050664	No						0.847242	0.145539
AT5G15440	0.0425833	0.479166	No						1.04799	0.743255
AT5G15710	-0.261792	0.000560306	No						0.0595125	2.30505e-05
AT5G18680	-0.208198	0.0179031	No						1.61783	0.000898778
AT5G18780	0.0239372	0.174522	No						0.602396	0.0429643
AT5G21040	0.4245	0.00635002	No						0.2287	0.00205157
AT5G22700	0.23	0.137754	No						0.7058	0.202573
AT5G22730	0.4395	0.000725937	No						0.2954	6.81603e-05
AT5G25350	-0.268041	0.000735668	No						0.59665	0.0335358
AT5G27750	-0.426909	0.000546564	No						2.16383	5.83997e-08
AT5G35995	0.0558462	0.571877	No						2.06025	7.70615e-05
AT5G42350	-0.2335	0.0680432	No						3.18205	1.62175e-11
AT5G43190	0.312343	0.000257263	No						1.25944	0.234026
AT5G44980	0.537632	0.194405	Yes	around 0.5	-0.36665	0.00066196	2.6476	0.025475	-1.03631	1.25812e-05
AT5G45360	-0.0761538	0.291789	No						1.76247	7.63009e-05
AT5G48170	0.3415	0.000155149	No						-0.6063	3.7372e-06
AT5G48980	-0.0123684	0.916165	No						-1.24101	4.55408e-06
AT5G48990	0.750193	9.42064e-07	No						1.34247	0.199259
AT5G49980	0.133327	0.00164749	No						1.20781	0.259524
AT5G50450	0.303505	0.0242943	No						1.38376	0.282626
AT5G51380	-0.00408907	0.968903	No						1.06635	0.889092
AT5G52120	0.0741667	0.295997	No						0.29295	5.76373e-05
AT5G52880	0.473562	0.0509642	No						1.68767	0.0935212
AT5G56180	0.0303733	0.609352	No						0.965283	0.355573
AT5G56370	0.0994347	0.220058	No						0.565391	0.0633977
AT5G56420	0.561426	6.24728e-08	No						0.960246	0.361223
AT5G56700	-0.173808	0.13231	No						1.15834	0.847201
AT5G56810	-0.130632	0.4885	No						1.11858	0.963361
AT5G57900	0.1465	0.0734828	No						1.8807	0.00344136
AT5G60570	0.142533	0.187013	No						1.18715	0.63947
AT5G60610	0.431193	0.000413634	No						1.10852	0.979637
AT5G62970	0.14	0.074616	No						1.10435	0.998695
AT5G65850	0.342345	0.000333782	No						1.23801	0.394729
AT5G67250	0.36796	0.0639148	No						1.57786	0.0162509
AT5G67340	0.103	0.124226	No						1.02877	0.396303
AT1G67530	-0.148	0.0120978	No						0.829333	0.387851
AT1G67530	-0.0452821	0.64721	No						0.516577	0.0148276
AT3G46510	0.318188	0.0480562	No						0.503187	0.0420805
AT3G54850	0.0196667	0.753232	No						1.04993	0.356984
AT1G29340	0.13935	0.285431	No						0.866355	0.812125
AT1G10560	-0.0915	0.190266	No						0.750183	0.210248
AT1G66160	0.01875	0.822541	No						0.492	0.000735562
AT5G37490	-0.0586154	0.446886	No						0.712731	0.167561
AT3G52450	0.120603	0.327758	No						0.892777	0.88764
AT2G35930	-0.313875	0.0486081	No						1.07584	0.61657
AT3G11840	0.06525	0.465613	No						0.670533	0.163842
AT3G19380	-0.05075	0.543972	No						0.528825	0.022102
AT1G49780	-0.02075	0.760901	No						0.951025	0.834178
AT5G64660	0.14875	0.073029	No						0.79835	0.484995
AT5G09800	-0.00975	0.937102	No						1.73882	0.0150185
AT3G18710	-0.113	0.10584	No						1.7071	0.00299877
AT3G49810	0.0968333	0.359821	Yes	around 0.5	-0.178933	0.0258127	1.10638	9.30169e-11	1.27989	0.0541346
AT5G65920	0.1475	0.0936907	No						1.33668	0.00403494
AT3G49060	0.250473	0.0142562	No						1.04525	0.593949
AT2G45910	0.0343947	0.717461	No						1.51228	0.00939221
AT3G61390	-0.1395	0.140709	No						1.7432	0.00183414
AT2G45920	0.276473	0.0253424	No						2.09956	0.0019564
AT5G65200	-0.246318	0.00989217	No						1.1664	0.36331
AT3G47820	0.151129	0.108237	No						0.897228	0.938068
AT5G40140	-0.083	0.385293	No						0.9704	0.720705
AT5G62560	0.376473	0.000473693	No						0.820603	0.572217
AT1G20780	-0.157	0.159893	No						1.48078	0.105785
AT1G27910	-0.218764	0.0110789	No						1.20648	0.0728406
AT5G18320	-0.261441	0.0342998	No						0.910524	0.980751
AT5G18330	0.11207	0.288774	No						1.46139	0.096721
AT5G18340	0.175689	0.11905	Yes	around 1.5	0.0105612	0.896622	2.1985	4.71073e-05	1.42208	0.0127144
AT5G67530	0.0428181	0.565791	No						0.94141	0.894301
AT5G65500	0.134973	0.17549	No						0.556552	0.100151
AT5G61560	-0.351323	0.0299461	No						1.45188	0.0268982
AT1G01680	-0.262454	0.0603865	No						0.827868	0.722934
AT1G01670	0.0151857	0.863058	No						1.70772	5.52018e-05
AT1G04510	0.728603	0.00617742	Yes	around 0	-0.360929	0.000158029	1.7455	5.12805e-05	0.263848	0.030942
AT2G33340	1.30775	2.86258e-11	No						-0.84575	1.99235e-11
AT3G07370	-0.287833	0.026798	No						1.34607	0.0265719

## Sheet: Sheet2
	0.14	0.15	0.08	0.11	0.09	0.16	0.17	0.13	0.18	0.1	0.15	0.11	0.16	0.14	0.1	0.13	0.12	0.15	0.12	0.14	0.18	0.13	0.12	0.19	0.14	0.16	0.18	0.1	0.19	0.22	0.151	0.124	0.204	0.162	0.141	0.156	0.182	0.132	0.225	0.152	0.113	0.288	0.199	0.219	0.142	0.143
	0.17	0.2	0.22	0.24	0.13	0.13	0.18	0.21	0.21	0.27	0.14	0.13	0.15	0.14	0.13	0.2	0.1	0.14	0.186	0.172	0.184	0.121	0.139	0.18	0.147	0.136	0.279
	0.242	0.132	0.233	0.124	0.233	0.079	0.092	0.122	0.136	0.154	0.17	0.188	0.076	0.168	0.274	0.148	0.223	0.117	0.113	0.161	0.219	0.079	0.102	0.188	0.176	0.313	0.172	0.258	0.225
	0.118	0.135	0.141	0.113	0.091	0.133	0.146	0.167	0.345	0.114	0.114	0.203	0.135	0.142	0.104	0.093	0.139	0.151	0.139	0.171	0.199	0.29	0.288	0.081	0.214	0.21	0.248	0.213	0.326	0.187	0.118	0.081	0.133	0.102	0.2	0.409	0.182	0.156	0.138	0.189	0.131	0.198	0.2	0.112	0.107	0.139	0.198	0.142	0.075
	0.18	0.13	0.13	0.11	0.21	0.23	0.14	0.1	0.28	0.14	0.12	0.21	0.11	0.11	0.1	0.08	0.14	0.13	0.08	0.15	0.08	0.13	0.14	0.11	0.22	0.13	0.13	0.13	0.15	0.14	0.23	0.14	0.22	0.14	0.15	0.3	0.13	0.13	0.17	0.22	0.132	0.169	0.098	0.101	0.129	0.295	0.129	0.108	0.149
	0.217	0.24	0.17	0.12	0.16	0.16	0.15	0.16	0.19	0.15	0.21	0.17	0.24	0.27	0.08	0.16	0.25	0.16	0.15	0.17	0.11	0.11	0.12	0.21	0.09	0.19	0.09	0.1	0.23	0.2	0.19	0.15	0.08	0.13	0.25	0.13	0.12	0.23
	0.329	0.212	0.292	0.163
	0.127	0.136	0.119	0.104	0.235	0.162	0.163	0.163	0.16	0.12	0.25	0.11	0.19	0.17	0.29	0.18	0.498	0.296	0.331	0.316	0.191	0.275	0.245	0.443	0.464	0.329	0.327	0.277	0.204	0.508	0.375	0.276	0.242	0.287	0.429	0.286	0.261	0.376	0.308	0.305	0.31	0.142	0.148	0.094	0.068	0.197	0.074	0.089	0.119
	0.162	0.075	0.14	0.158	0.145	0.161	0.126	0.205	0.347	0.233	0.158	0.134	0.125	0.107	0.105	0.139	0.115	0.262	0.111	0.071	0.146	0.146	0.113	0.148	0.099	0.139	0.182	0.129
	0.246	0.168	0.183	0.233	0.146	0.097	0.185	0.405	0.219	0.132	0.204	0.188	0.267	0.241	0.214	0.129	0.271	0.159	0.12	0.189	0.148	0.114	0.203	0.12	0.187	0.187	0.169	0.17	0.201	0.105	0.114	0.217	0.151	0.135	0.097	0.094	0.195	0.156	0.115	0.164
	0.3	0.088	0.245	0.261	0.319	0.135	0.185	0.213	0.109	0.188	0.133	0.242	0.148	0.269	0.142	0.13	0.08	0.093
	0.078	0.175	0.146	0.119	0.253	0.14	0.171	0.119	0.178	0.236	0.271	0.436	0.159	0.245	0.24	0.357	0.106	0.11	0.145	0.239	0.122	0.097	0.156	0.194	0.198	0.151	0.128	0.143	0.184	0.091	0.116	0.124	0.189	0.238	0.111	0.14	0.096	0.134	0.129	0.12	0.126	0.098	0.171	0.222	0.229	0.152	0.075	0.147	0.085
	0.138	0.168	0.13	0.107	0.196	0.139	0.193	0.191	0.265	0.167	0.181	0.079	0.128	0.086	0.333	0.296	0.263	0.172	0.173	0.141	0.273	0.243	0.18	0.233	0.289	0.262	0.225	0.227	0.081	0.135	0.251	0.171	0.275	0.151	0.154	0.265	0.129	0.157	0.275	0.17	0.407	0.153	0.12	0.101	0.178	0.165	0.228	0.134	0.157
	0.185	0.159	0.136	0.178	0.172	0.154
	0.186	0.242	0.164	0.144	0.199	0.161	0.254	0.279	0.154	0.281	0.32	0.151	0.172	0.115	0.187	0.23	0.197	0.276	0.247	0.217	0.218	0.301	0.278	0.218	0.183	0.272	0.209	0.216	0.122	0.276	0.254	0.247	0.139	0.137	0.143	0.266	0.27	0.19	0.182	0.263	0.33	0.157	0.127	0.069	0.11	0.151	0.153	0.183	0.204
	0.279	0.32	0.284	0.191	0.143	0.366	0.342	0.177	0.146	0.287	0.228	0.311	0.288	0.367	0.235
	0.131	0.137	0.075	0.115	0.08	0.148	0.108	0.148	0.144	0.125	0.154	0.118	0.098	0.194	0.093	0.106	0.142	0.131	0.161	0.102	0.194	0.281	0.292	0.271	0.265	0.153	0.158	0.141	0.223	0.101	0.16	0.202	0.244	0.224	0.147	0.232	0.119	0.196	0.241	0.116	0.127	0.238	0.19	0.159	0.136	0.108	0.222	0.121	0.197
	0.113	0.154	0.09	0.243	0.109	0.174	0.205	0.128
	0.346	0.603	0.223	0.579	0.242	0.291	0.151	0.258	0.366	0.167	0.474	0.276	0.194	0.281	0.192	0.098	0.283	0.153	0.251	0.23	0.152	0.274	0.225	0.196	0.212	0.156	0.238	0.117	0.156	0.253	0.232	0.174	0.192	0.082	0.185	0.14	0.214	0.182	0.171	0.207	0.218	0.1	0.186	0.144	0.162	0.218	0.17	0.137	0.23
	0.187	0.148	0.199	0.179	0.219	0.17	0.13	0.109	0.193	0.144	0.085	0.097	0.126	0.13	0.234	0.203	0.126	0.096	0.165	0.199	0.118	0.107	0.159	0.134	0.228	0.234	0.184	0.258	0.137	0.175
	0.19	0.192	0.323	0.199	0.132	0.212	0.214	0.247	0.244	0.237	0.116	0.113	0.089	0.177	0.109	0.157	0.126	0.147	0.171	0.121
	0.152	0.312	0.296	0.266	0.167	0.149	0.243	0.183	0.177	0.099	0.19	0.348	0.316	0.168	0.138	0.148	0.165	0.15	0.303	0.173	0.128	0.106	0.132	0.089	0.097	0.183	0.133	0.181	0.197	0.18	0.128	0.217	0.179	0.155	0.268	0.163	0.238	0.191	0.093	0.174
	0.135	0.094	0.151	0.215	0.21	0.194	0.255	0.205	0.155	0.112	0.189	0.069	0.102	0.159	0.191	0.132	0.129	0.107	0.052	0.076	0.154	0.133	0.161	0.159	0.184	0.121	0.131	0.226	0.127	0.181	0.164	0.118	0.184	0.135	0.1	0.198	0.099	0.108	0.111	0.167	0.197	0.276	0.105	0.173	0.229	0.178	0.101	0.146	0.137
	0.234	0.149	0.298	0.295	0.235	0.267	0.148	0.241	0.171	0.127	0.132	0.182	0.122	0.233	0.211	0.205	0.109	0.197	0.106	0.161	0.176	0.172	0.174	0.149	0.132	0.17	0.143	0.11	0.092	0.151	0.152	0.191	0.166	0.151	0.112	0.114	0.104	0.105	0.161	0.15	0.259	0.216	0.158	0.139	0.204	0.158	0.19	0.148	0.143
	0.12	0.25	0.24	0.24	0.17	0.18	0.21	0.11	0.24	0.19	0.14	0.11	0.12	0.12	0.08	0.09	0.18	0.14	0.14	0.18	0.147	0.152	0.202	0.131	0.173	0.242	0.225	0.121	0.162	0.14	0.17	0.17	0.07	0.14	0.21	0.2	0.11	0.24	0.12
	0.091	0.165	0.114	0.157	0.162	0.144	0.17	0.121	0.184	0.094	0.252	0.182	0.13	0.139	0.199	0.089	0.174	0.154	0.176	0.127
	0.123	0.081	0.097	0.115	0.165	0.098	0.283	0.132	0.143	0.169	0.189	0.087	0.227	0.19	0.115	0.117	0.154	0.179	0.171	0.201
	0.283	0.16	0.156	0.162	0.09	0.159	0.23	0.184	0.229	0.294	0.28	0.147	0.219	0.24	0.131
	0.115	0.131	0.139	0.125	0.148	0.114	0.309	0.127	0.13	0.121	0.122	0.139	0.162	0.128	0.146	0.118	0.152	0.113	0.095	0.104	0.133	0.108	0.147	0.179	0.108	0.146	0.122	0.092	0.116	0.111	0.148	0.207	0.093	0.172	0.15	0.111	0.124	0.166	0.173	0.127
	0.189	0.175	0.184	0.128	0.191	0.169	0.099	0.137	0.131	0.129	0.147	0.169	0.132	0.127	0.125	0.199	0.138	0.281	0.103	0.18	0.15	0.14	0.11	0.11	0.17	0.17	0.12	0.12	0.13	0.11	0.12	0.09	0.11	0.14	0.14	0.11	0.11	0.19	0.17	0.17
	0.21	0.12	0.14	0.18	0.14	0.14	0.18	0.21	0.12	0.18	0.33	0.16	0.24	0.1	0.09	0.12	0.11	0.142	0.316	0.157
	0.199	0.25	0.196	0.125	0.173	0.318	0.244	0.229	0.152	0.162	0.158	0.142	0.155	0.192	0.131	0.17	0.148	0.255	0.116	0.159	0.193	0.125	0.155	0.124	0.149	0.119	0.156	0.175	0.07	0.129
	0.142	0.093	0.131	0.11	0.152	0.115	0.101	0.118	0.09	0.125	0.167	0.183	0.116	0.107	0.151	0.103	0.125	0.133	0.167	0.301	0.178	0.133	0.164	0.1	0.149	0.192	0.117	0.083	0.18	0.158	0.075	0.11	0.215	0.148	0.105	0.147	0.131	0.187	0.176	0.189	0.152	0.164	0.167	0.184	0.104	0.172	0.221	0.174	0.081
	0.117	0.094	0.129	0.179	0.145	0.106	0.151	0.118	0.073	0.071	0.114	0.077	0.167	0.137	0.113	0.107	0.165	0.102	0.133	0.095
	0.215	0.157	0.162	0.156	0.126	0.159	0.186	0.104	0.111	0.144	0.178	0.169	0.342	0.143	0.162	0.198	0.217	0.135	0.182	0.138
	0.134	0.137	0.225	0.18	0.198	0.132	0.179	0.122	0.117	0.124	0.159	0.174	0.141	0.149	0.152	0.137	0.162	0.115	0.111	0.271	0.112	0.208	0.163	0.177	0.124	0.142	0.109	0.084	0.191	0.112	0.11	0.165	0.093	0.143	0.15	0.122	0.178	0.155	0.168	0.107	0.17	0.168	0.156	0.213	0.176	0.203	0.138	0.134	0.227
	0.163	0.191	0.113	0.107	0.093	0.119	0.149	0.158	0.168	0.157	0.144	0.153	0.125	0.14	0.118	0.215	0.15	0.184	0.148	0.113	0.107	0.082	0.075	0.158	0.154	0.13	0.162	0.141	0.109	0.245	0.149	0.306	0.188	0.17	0.164	0.116	0.319	0.227	0.122
	0.209	0.139	0.208	0.115	0.17	0.087	0.083	0.17	0.268	0.141	0.175	0.176	0.142	0.459	0.242	0.229	0.163	0.152	0.177	0.173
	0.263	0.191	0.259	0.17	0.493	0.209	0.247	0.18	0.216	0.207	0.166	0.192	0.291	0.18	0.218	0.168	0.267	0.177	0.09	0.21	0.17	0.22	0.17	0.15	0.29	0.21	0.17	0.13	0.07	0.2	0.17	0.24	0.19	0.25	0.21	0.14	0.27	0.18
	0.294	0.159
	0.168	0.257	0.358	0.193	0.221	0.349	0.234	0.155	0.149	0.226	0.117	0.132	0.114	0.126	0.116	0.122	0.126	0.095	0.185	0.161	0.189	0.232	0.269	0.183	0.305	0.217	0.229	0.219	0.097	0.277	0.183	0.137	0.153	0.203	0.174	0.153	0.237	0.196	0.135
	0.151	0.133	0.169	0.114	0.078	0.128	0.193	0.115	0.063	0.176	0.121	0.133	0.19	0.107	0.118	0.149	0.135	0.097	0.1	0.176	0.076	0.334	0.199	0.209	0.371	0.333	0.236	0.216	0.185	0.192	0.196	0.252	0.155	0.218	0.228	0.147	0.244	0.29	0.443	0.204	0.195	0.188	0.153	0.155	0.132	0.137	0.059	0.162	0.227
	0.198	0.237	0.151	0.22	0.177	0.171	0.162	0.137	0.11	0.129	0.147	0.15	0.129	0.1	0.185	0.156	0.158	0.163	0.203	0.111	0.565	0.207	0.216	0.129	0.113	0.131	0.272	0.114	0.28	0.324	0.11	0.249	0.203	0.264	0.199	0.208	0.212	0.209	0.232	0.151	0.127	0.057	0.137	0.089	0.107	0.098	0.105	0.067	0.113
	0.121	0.174	0.22	0.181	0.128	0.082	0.101	0.16	0.181	0.119	0.097	0.173	0.196	0.201	0.155	0.144	0.138	0.184	0.173	0.151
	0.17	0.23	0.43	0.42	0.2	0.28	0.4	0.24	0.34	0.34	0.2	0.11	0.29	0.14	0.18	0.21	0.35	0.21	0.22	0.18	0.32
	0.199	0.23	0.227	0.156	0.182	0.182	0.165	0.174	0.215	0.154	0.125	0.197	0.179	0.137	0.14	0.167	0.091	0.124	0.134	0.174	0.109	0.124	0.142	0.119	0.126	0.147	0.128	0.132	0.174	0.159	0.069	0.099	0.122	0.087	0.1	0.083	0.091	0.139	0.113	0.136
	0.373	0.332	0.421	0.235	0.32	0.417	0.194	0.215	0.41	0.241	0.17	0.143	0.044	0.135	0.178	0.168	0.19	0.17	0.137	0.088	0.224	0.128	0.15	0.228	0.275	0.189	0.294	0.257	0.235	0.229	0.322	0.34	0.264	0.265	0.227	0.253	0.233	0.305	0.258	0.145	0.285	0.601	0.331	0.207	0.387	0.225	0.297	0.381	0.177
	0.198	0.156	0.17	0.179	0.196	0.292	0.088	0.163	0.128	0.099	0.178	0.119	0.16	0.181	0.149	0.147	0.133	0.122	0.125	0.213	0.169	0.117	0.174	0.197	0.248	0.201	0.192	0.244	0.086	0.209	0.134	0.334	0.215	0.17	0.123	0.083
	0.126	0.222	0.165	0.128	0.117	0.166	0.128	0.122	0.199	0.149	0.099	0.121	0.11	0.142	0.153	0.089
	0.238	0.235	0.189	0.159	0.28	0.207	0.183	0.281	0.252	0.252	0.151	0.295	0.175	0.164	0.456	0.194	0.25	0.12	0.124	0.163	0.163	0.288	0.126	0.228	0.149	0.12	0.142	0.117	0.094	0.124	0.213	0.12	0.136	0.165	0.111	0.156	0.14	0.122	0.124	0.13	0.156	0.204	0.134	0.155	0.122	0.121	0.154	0.355	0.146
	0.124	0.124	0.116	0.285	0.137	0.129	0.116	0.122	0.106	0.177	0.232	0.194	0.172	0.166	0.157	0.186	0.142	0.151	0.141	0.21	0.1	0.099	0.181	0.184	0.126	0.096	0.17	0.281	0.149	0.14	0.145	0.113	0.199	0.138	0.106	0.198	0.235	0.109	0.155	0.224
	0.244	0.325	0.088	0.171	0.094	0.135	0.18	0.306	0.2	0.08	0.104	0.154	0.192	0.192	0.127	0.176	0.116	0.094	0.131	0.159
	0.127	0.206	0.112	0.114	0.104	0.141	0.214	0.093	0.107	0.191	0.164	0.131	0.214	0.11	0.164	0.182	0.168	0.142	0.151	0.222
	0.381	0.228	0.295	0.301	0.322	0.322	0.298	0.334	0.322	0.328	0.203	0.367	0.31	0.194	0.319	0.281	0.258	0.281	0.229	0.348	0.31	0.328	0.329	0.293	0.338	0.384	0.294	0.286	0.475	0.293	0.346	0.354	0.323	0.472	0.296	0.315	0.555	0.351	0.394	0.306
	0.189	0.273	0.266	0.442	0.304	0.361	0.28	0.457	0.523	0.249	0.451	0.35	0.203	0.149	0.261	0.146	0.296	0.155	0.352	0.238	0.309	0.308	0.553	0.283	0.286	0.378	0.378	0.242	0.128	0.427	0.389	0.175	0.218	0.133	0.25	0.251	0.373	0.106	0.148
	0.328	0.214	0.144	0.253	0.104	0.168	0.27	0.17	0.162	0.257	0.208	0.159	0.165	0.194	0.233	0.209	0.514	0.275	0.163	0.196	0.375	0.301	0.395	0.331	0.323	0.355	0.161	0.46	0.153	0.288	0.373	0.163	0.298	0.29	0.292	0.25	0.267	0.296	0.263	0.246
	0.213	0.165	0.14	0.174	0.152	0.127	0.146	0.153	0.199	0.187	0.176	0.201	0.139	0.097	0.113	0.164	0.097
	0.103	0.124	0.195	0.13	0.154	0.177	0.136	0.136	0.133	0.067	0.112	0.153	0.15	0.153	0.184	0.185	0.16	0.236	0.14	0.148
	0.148	0.11	0.098	0.156	0.106	0.121	0.09	0.186	0.127	0.226	0.15	0.136	0.144	0.136	0.123	0.126	0.164	0.117	0.141	0.244	0.178	0.165	0.109	0.118	0.152	0.134	0.242	0.15	0.186	0.13	0.124	0.122	0.081	0.1	0.145	0.15	0.097	0.246	0.191
	0.198	0.167	0.306	0.135	0.29	0.28	0.171	0.266	0.214	0.399	0.142	0.152	0.244	0.122	0.211	0.301	0.196	0.234	0.326	0.302	0.361	0.378	0.306	0.22	0.144	0.334	0.293	0.319	0.336	0.218
	0.104	0.08	0.087	0.123	0.124	0.096	0.059	0.141	0.133	0.139	0.074	0.117	0.121	0.14	0.219	0.135	0.131	0.091	0.079	0.111	0.173	0.13	0.133	0.073	0.122	0.162	0.185	0.133	0.133	0.181	0.22	0.143	0.14	0.123	0.12	0.082	0.13	0.117	0.156	0.141	0.277	0.198	0.311	0.35	0.285	0.34	0.313	0.494	0.255
	0.211	0.378	0.287	0.291	0.268	0.235	0.12	0.35	0.383	0.211	0.196	0.117	0.203	0.078	0.111	0.272	0.136	0.277	0.123	0.157	0.312	0.271	0.327	0.322	0.324	0.243	0.367	0.291	0.338	0.385	0.087	0.133	0.152	0.124	0.318	0.122	0.145	0.115	0.264	0.173
	0.17	0.17	0.31	0.19	0.12	0.17	0.14	0.16	0.23	0.17	0.21	0.1	0.14	0.13	0.08	0.1	0.1	0.13	0.14	0.21	0.24	0.26	0.09	0.16	0.14	0.14	0.22	0.12	0.23	0.18	0.12	0.12	0.21	0.13	0.17	0.15	0.11	0.12	0.22	0.29
	0.12	0.114	0.126	0.193	0.128	0.141	0.17	0.334	0.271	0.195	0.099	0.206	0.211	0.161	0.132	0.166	0.098	0.189	0.205	0.117
	0.123	0.15	0.148	0.131	0.163	0.186	0.272	0.223	0.106	0.137	0.17	0.14	0.25	0.2	0.12	0.15	0.12	0.13	0.09	0.29	0.12	0.31	0.23	0.29	0.19	0.12	0.12	0.19	0.16	0.11	0.09	0.12	0.17	0.11	0.12	0.21	0.08	0.13	0.13	0.09	0.09	0.15	0.13	0.17	0.17	0.22	0.19	0.11	0.22
	0.147	0.132	0.083	0.119	0.215	0.213	0.154	0.152	0.13	0.127	0.108	0.169	0.199	0.121	0.15	0.135	0.196	0.105	0.138	0.258
	0.155	0.101	0.161	0.079	0.117	0.129	0.111	0.153	0.1	0.127	0.229	0.14	0.199	0.052	0.173	0.14	0.194	0.216	0.283	0.184
	0.25	0.272	0.258	0.237	0.194	0.261	0.19	0.217	0.177	0.317	0.119	0.087	0.179	0.116	0.167	0.133	0.08	0.139	0.28	0.251	0.186	0.189	0.186	0.186	0.235	0.159	0.266	0.224	0.299	0.231	0.145	0.135	0.155	0.114	0.162	0.111	0.076	0.216	0.165	0.141
	0.113	0.107	0.128	0.205	0.207	0.086	0.126	0.221	0.079	0.144	0.163	0.202	0.251	0.285	0.18	0.098	0.153	0.206	0.15	0.194	0.17	0.182	0.163	0.165	0.105	0.192	0.165	0.206	0.141	0.314	0.163	0.255	0.259	0.204	0.211
	0.297	0.258	0.197	0.372	0.344	0.333	0.291	0.358	0.232	0.133	0.142	0.346	0.223	0.341	0.339	0.136	0.347	0.238	0.168	0.12	0.247	0.289	0.117	0.153	0.237	0.2	0.244	0.137	0.231	0.133	0.245	0.298	0.212	0.243	0.132	0.297	0.193	0.25	0.075
	0.137	0.17	0.159	0.136	0.146	0.102	0.098	0.161	0.241	0.151	0.206	0.164	0.146	0.155	0.092	0.132	0.102	0.146	0.069	0.087	0.156	0.09	0.12	0.2	0.149	0.178	0.206	0.073	0.094	0.15	0.166	0.11	0.083	0.134	0.156	0.128	0.081	0.085	0.103	0.109
	0.184	0.293	0.289	0.127	0.115	0.195	0.184	0.203	0.219	0.208	0.398	0.178	0.316	0.211	0.298	0.241	0.288	0.164	0.246	0.226	0.125	0.159	0.216	0.182	0.124
	0.113	0.144	0.109	0.191	0.091	0.088	0.148	0.1	0.197	0.149	0.153	0.097	0.148	0.151	0.172	0.131	0.116	0.095	0.092	0.142
	0.192	0.251	0.091	0.088	0.124	0.144	0.122	0.319	0.149	0.122	0.164	0.224	0.134	0.16	0.194	0.065	0.258	0.127	0.151	0.194	0.098	0.155	0.135	0.128	0.13	0.134	0.148	0.121	0.306	0.138	0.103	0.16	0.154	0.114	0.123	0.165	0.169	0.208	0.15	0.135
	0.237	0.126	0.149	0.154	0.159	0.126	0.13	0.11	0.125	0.09	0.184	0.184	0.136	0.167	0.177	0.152	0.113	0.195	0.109	0.157	0.163	0.104	0.132	0.176	0.254	0.193	0.191	0.097	0.195	0.227
	0.12	0.079	0.158	0.164	0.215	0.089	0.131	0.165	0.152	0.17	0.19	0.132	0.112	0.078	0.288	0.13	0.129	0.084	0.143	0.293
	0.179	0.088	0.149	0.134	0.108	0.087	0.116	0.131	0.173	0.157	0.098	0.223	0.08	0.165
	0.18	0.063	0.133	0.131	0.096	0.089	0.096	0.119	0.096	0.136	0.153	0.187	0.123	0.155	0.113	0.087	0.12	0.125	0.104	0.107	0.194	0.271	0.174	0.128	0.201	0.197	0.238	0.18	0.272	0.083	0.183	0.22	0.295	0.213	0.228	0.15	0.188	0.208	0.179	0.187	0.191	0.149	0.252	0.275	0.146	0.183	0.223	0.233	0.09
	0.162	0.115	0.166	0.101	0.09	0.112	0.131	0.203	0.165	0.116	0.2	0.182	0.163	0.107	0.15	0.146	0.19	0.15	0.143	0.111	0.18	0.206	0.16	0.165	0.152	0.112	0.113	0.143	0.16	0.115	0.172	0.108	0.15	0.198	0.191	0.152	0.197	0.162	0.115	0.157
	0.184	0.151	0.185	0.175	0.253	0.281	0.186	0.149	0.229	0.145	0.218	0.191	0.257	0.1	0.101	0.188	0.141	0.144	0.157	0.107	0.119	0.065	0.14	0.111	0.103	0.109	0.127	0.119	0.171	0.163	0.169	0.12	0.158	0.12	0.258	0.137	0.208	0.152	0.194	0.135	0.131	0.148	0.097	0.185	0.934	0.247	0.101	0.144	0.137
	0.088	0.163	0.096	0.144	0.134	0.233	0.085	0.161	0.252	0.103	0.144	0.125	0.151	0.146	0.179	0.15	0.205	0.114	0.186	0.139	0.123	0.205	0.202	0.147	0.114	0.118	0.09	0.155	0.129	0.103	0.132	0.048	0.222	0.168	0.114	0.112	0.165	0.128	0.124	0.105
	0.126	0.119	0.209	0.216	0.076	0.169	0.066	0.115	0.194	0.204	0.129	0.15	0.174	0.087	0.171	0.171	0.142	0.102	0.096	0.094	0.148	0.113	0.142	0.107	0.08	0.089	0.123	0.25	0.197	0.131	0.143	0.089	0.057	0.078	0.177	0.113	0.138	0.074	0.089	0.088
	0.14	0.136	0.09	0.16	0.097	0.141	0.153	0.109	0.19	0.224	0.121	0.08	0.091	0.294	0.195	0.198	0.235	0.177	0.215	0.147
	0.164	0.137	0.216	0.158	0.14	0.168	0.143	0.184	0.213	0.163	0.158	0.195	0.109	0.195	0.265	0.129	0.101	0.09	0.139	0.158	0.209	0.124	0.15	0.182	0.085	0.148	0.173	0.11	0.097	0.13	0.25	0.245	0.364	0.366	0.272	0.121	0.156	0.216	0.121	0.089	0.149	0.095	0.126	0.14	0.115	0.231	0.14	0.122	0.133
	0.074	0.258	0.167	0.156	0.143	0.105	0.162	0.148	0.149	0.127	0.092	0.197	0.138	0.208	0.117	0.125	0.138	0.089	0.157	0.167
	0.182	0.241	0.272	0.133	0.126	0.094	0.148	0.126	0.067	0.155	0.097	0.187	0.122	0.229	0.137	0.141	0.137	0.156	0.183	0.199
	0.115	0.112	0.114	0.153	0.146	0.154	0.154	0.112	0.166	0.17	0.172	0.158	0.131	0.087	0.15	0.145	0.196	0.164	0.196	0.122
	0.147	0.108	0.145	0.101	0.127	0.155	0.195	0.192	0.127	0.158	0.118	0.153	0.144	0.249	0.097	0.102
	0.28	0.168	0.129	0.159	0.157	0.115	0.1	0.115	0.072	0.213	0.187	0.329	0.204	0.394	0.091	0.395	0.17	0.23	0.12	0.161	0.094	0.093	0.158	0.241	0.069	0.184	0.176	0.217	0.128	0.1	0.134	0.118	0.214	0.155	0.153	0.197	0.121	0.174	0.127	0.202
	0.391	0.121	0.11	0.189	0.122	0.135	0.074	0.089	0.109	0.114	0.141	0.218	0.11	0.117	0.168	0.205	0.142	0.103	0.15	0.14	0.077	0.091	0.127	0.13	0.124	0.117	0.131	0.072	0.145	0.155	0.178	0.182	0.177	0.178	0.163	0.159	0.216	0.182	0.12	0.146
	0.129	0.148	0.124	0.19	0.18	0.124	0.154	0.176	0.159	0.106	0.163	0.182	0.119	0.1	0.168	0.147	0.147	0.106	0.098	0.178	0.167	0.341	0.28	0.293	0.241	0.196	0.269	0.18	0.165	0.159	0.282	0.245	0.111	0.173	0.194	0.328	0.261	0.243	0.177
	0.326	0.159	0.164	0.118	0.106	0.189	0.211	0.141	0.165	0.204	0.191	0.226	0.18	0.189	0.141	0.226	0.174	0.16	0.141	0.128	0.3	0.155	0.13	0.142	0.096	0.111	0.257	0.198	0.086	0.12	0.129	0.177	0.138	0.153	0.144	0.493	0.165	0.085	0.132	0.137	0.197	0.071	0.119	0.14	0.307	0.102	0.116	0.164	0.154
	0.208	0.159	0.195	0.142	0.261	0.167	0.333	0.144	0.342	0.151	0.137	0.332	0.134	0.122	0.179	0.139	0.21	0.188	0.051	0.214	0.151	0.115	0.162	0.153	0.239	0.109	0.145	0.188	0.126	0.215	0.155	0.169	0.209	0.285	0.218	0.202	0.2	0.225	0.198	0.28
	0.099	0.311	0.223	0.281	0.104	0.293	0.121	0.115	0.11	0.103	0.127	0.1	0.14	0.137	0.19	0.217
	0.137	0.158	0.142	0.124	0.247	0.112	0.117	0.125	0.214	0.115	0.207	0.197	0.267	0.18	0.195	0.071	0.22	0.189	0.169	0.219	0.136	0.161	0.097	0.151	0.15	0.158	0.083	0.133	0.173	0.154	0.131	0.119	0.087	0.12	0.181	0.125	0.133	0.153	0.204	0.066	0.16	0.181	0.161	0.169	0.11	0.125	0.145	0.176	0.105
	0.099	0.161	0.15	0.101	0.166	0.118	0.148	0.132	0.146	0.106	0.134	0.187	0.194	0.121	0.232	0.121	0.175	0.311
	0.242	0.155	0.137	0.108	0.143	0.075	0.147	0.068	0.09	0.138	0.112	0.098	0.177	0.153	0.234	0.195	0.103	0.115	0.348	0.124
	0.149	0.062	0.096	0.285	0.094	0.116	0.206	0.149	0.107	0.12	0.243	0.163	0.123	0.191	0.113	0.247	0.112	0.119	0.317	0.21
	0.132	0.128	0.165	0.151	0.122	0.123	0.225	0.188	0.1	0.196	0.098	0.161	0.133	0.239	0.202	0.07	0.112	0.164	0.218	0.19	0.279	0.081	0.129	0.075	0.09	0.098	0.113	0.108	0.207	0.096	0.092	0.207	0.202	0.133	0.098	0.12	0.187	0.113	0.111	0.114
	0.134	0.13	0.154	0.164	0.225	0.131	0.12	0.117	0.218	0.155	0.17	0.193	0.173	0.202	0.18	0.18	0.141	0.148	0.12	0.162	0.183	0.24	0.184	0.148	0.242	0.132	0.152	0.151	0.117	0.154	0.142	0.187	0.156	0.107	0.167	0.096	0.19	0.113	0.195	0.108	0.13	0.146	0.175	0.105	0.137	0.217	0.143	0.163	0.209
	0.307	0.223	0.231	0.353	0.208	0.291	0.314	0.406	0.25	0.151	0.254	0.382	0.342	0.319	0.254	0.319	0.371	0.365	0.375	0.359	0.197	0.113	0.183	0.163	0.157	0.17	0.158	0.138	0.139	0.148	0.145	0.198	0.167	0.11	0.166	0.125	0.129	0.139	0.128	0.199
	0.293	0.18	0.241	0.28	0.221	0.235	0.159	0.427	0.287	0.148	0.141	0.468	0.137	0.16	0.21	0.25	0.24	0.14	0.15	0.21	0.11	0.16	0.21	0.13	0.2	0.11	0.21	0.15	0.21	0.18	0.17	0.23	0.24
	0.24	0.2	0.13	0.19	0.08	0.12	0.14	0.46	0.16	0.17	0.11	0.16	0.1	0.16	0.1	0.13	0.21	0.16	0.21
	0.143	0.089	0.154	0.104	0.19	0.15	0.135	0.143	0.091	0.094	0.092	0.204	0.136	0.097	0.104	0.129	0.188	0.123	0.116	0.141
	0.155	0.128	0.11	0.144	0.096	0.241	0.182	0.101	0.127	0.125	0.292	0.156	0.131	0.126	0.151	0.085	0.173	0.191	0.158	0.116	0.126	0.19	0.135	0.101	0.224	0.141	0.23	0.125	0.095	0.094	0.068	0.219	0.164	0.08	0.125	0.107	0.164	0.081	0.107	0.165
	0.142	0.181	0.207	0.135	0.23	0.268	0.243	0.15	0.239	0.14	0.293	0.113	0.19	0.328	0.118	0.091	0.185	0.092	0.172	0.136
	0.123	0.145	0.124	0.159	0.112	0.11	0.113	0.115	0.171	0.101	0.221	0.202	0.217	0.235	0.175	0.171	0.178	0.213	0.3	0.17	0.203	0.213	0.255	0.342	0.215	0.244	0.228	0.232	0.231	0.274
	0.303	0.177	0.218	0.19	0.31	0.198	0.226	0.263	0.225	0.26	0.207	0.293	0.201	0.248	0.125	0.247	0.254	0.215	0.149	0.152	0.404	0.111	0.212	0.218	0.318	0.174	0.159	0.267	0.203	0.196	0.16	0.167	0.224	0.169	0.107	0.23	0.173	0.138	0.137	0.143	0.148	0.118	0.187	0.13	0.1	0.214	0.095	0.141	0.121
	0.11	0.193	0.154	0.177	0.135	0.267	0.082	0.109	0.161	0.188	0.121	0.088	0.161	0.149	0.172
	0.129	0.187	0.241	0.185	0.191	0.171	0.199	0.223	0.233	0.238	0.238	0.265	0.202	0.228	0.176	0.173	0.233	0.224	0.124	0.192	0.29	0.209	0.311	0.382	0.166	0.22	0.08	0.236	0.276	0.27	0.375	0.181	0.201	0.278	0.137	0.144	0.125	0.2	0.246	0.16	0.187	0.156	0.119	0.165	0.113	0.106	0.211	0.192	0.096
	0.287	0.115	0.193	0.162	0.124	0.115	0.236	0.13	0.191	0.156	0.134	0.217	0.093	0.104	0.142	0.149	0.136	0.195	0.154	0.098	0.283	0.135	0.144	0.135	0.157	0.144	0.169	0.108	0.161	0.194
	0.212	0.208	0.1	0.212	0.187	0.208	0.069	0.147	0.085	0.19	0.128	0.154	0.196	0.177	0.133	0.09	0.265	0.087	0.217	0.056	0.189	0.391	0.296	0.177	0.271	0.382	0.345	0.287	0.294	0.175	0.173	0.132	0.335	0.302	0.202	0.221	0.179	0.176	0.203	0.164
	0.16	0.16	0.12	0.11	0.16	0.16	0.14	0.19	0.2	0.26	0.16	0.34	0.24	0.16	0.1	0.1	0.19	0.09	0.15	0.2	0.18	0.09	0.23	0.13	0.19	0.09	0.13	0.16	0.118	0.212	0.206	0.155	0.189	0.127	0.176	0.142	0.117	0.219	0.117	0.179	0.153	0.156	0.1	0.181	0.245	0.147	0.154	0.134
	0.204	0.189	0.16	0.078	0.132	0.108	0.105	0.104	0.057	0.113	0.166	0.126	0.216	0.15	0.133	0.168	0.12	0.101	0.131	0.137	0.128	0.118	0.198	0.116	0.167	0.092	0.247	0.078	0.112	0.332	0.223	0.26	0.244	0.188	0.144	0.111	0.216	0.144	0.103
	0.186	0.245	0.129	0.164	0.171	0.13	0.076	0.124	0.183	0.144	0.108	0.093	0.149	0.175	0.108	0.253	0.204	0.177	0.19	0.392	0.163	0.115	0.191	0.079	0.142	0.105	0.116	0.23	0.136	0.101	0.157	0.161	0.236	0.12	0.098	0.125	0.191	0.125	0.14	0.153
	0.192	0.202	0.129	0.13	0.164	0.16	0.34	0.205	0.305	0.151	0.171	0.183	0.172	0.155	0.116	0.259	0.23	0.184	0.105	0.109
	0.07	0.15	0.26	0.13	0.22	0.12	0.24	0.15	0.13	0.22	0.13	0.09	0.11	0.12	0.15	0.16	0.08	0.16	0.15	0.12
	0.14	0.143	0.24	0.206	0.169	0.261	0.208	0.148	0.316	0.21	0.145	0.239	0.324	0.193	0.253	0.162	0.167	0.198	0.123	0.168	0.24	0.13	0.05
	0.13	0.12	0.1	0.13	0.14	0.14	0.13	0.11	0.14	0.14	0.13	0.15	0.16	0.18	0.13	0.13	0.13	0.09	0.14	0.11	0.13	0.15	0.1	0.1	0.27	0.11	0.17	0.11	0.17	0.2	0.11	0.08	0.11	0.12	0.07	0.19	0.15	0.11	0.1	0.1	0.186	0.169	0.11	0.156	0.207	0.19	0.192	0.255	0.281
	0.2	0.22	0.13	0.21	0.19	0.1	0.13	0.13	0.14	0.18	0.17	0.13	0.25	0.23	0.29	0.13	0.13	0.25	0.16	0.13	0.15	0.21	0.16	0.13	0.25	0.13	0.12	0.11	0.23	0.1	0.15	0.13	0.13	0.13	0.13	0.13	0.12	0.17	0.1
	0.12	0.11	0.17	0.15	0.14	0.15	0.12	0.1	0.16	0.12	0.14	0.17	0.12	0.16	0.09	0.14	0.13	0.13	0.11	0.09	0.11	0.13	0.13	0.13	0.18	0.13	0.22	0.19	0.2	0.12	0.13	0.14	0.15	0.09	0.22	0.14	0.11	0.21	0.09	0.18	0.209	0.264	0.211	0.185	0.178	0.151	0.09	0.189	0.127
	0.146	0.101	0.175	0.152	0.172	0.237	0.155	0.254	0.091	0.126	0.197	0.242	0.165	0.108	0.183	0.119	0.1	0.178	0.118	0.136
	0.137	0.147	0.127	0.155	0.098	0.128	0.098	0.118	0.118	0.11	0.1	0.143	0.116	0.09	0.139	0.106	0.096	0.191	0.171	0.146	0.154	0.101	0.115	0.172	0.118	0.185	0.142	0.145	0.082	0.173	0.125	0.103	0.165	0.121	0.163	0.076	0.105	0.138	0.157	0.124
	0.185	0.099	0.121	0.112	0.143	0.106	0.083	0.143	0.155	0.168	0.097	0.182	0.127	0.198	0.368	0.132	0.183	0.155	0.169	0.158	0.198	0.147	0.135	0.136	0.103	0.185	0.14	0.1	0.094	0.121	0.103	0.084	0.191	0.162	0.184	0.197	0.12	0.109	0.117	0.123	0.11	0.115	0.151	0.21	0.114	0.095	0.114	0.163	0.113
	0.116	0.27	0.319	0.269	0.355	0.392	0.272	0.312	0.279	0.112	0.212	0.277	0.314	0.27	0.252	0.197	0.229	0.334	0.351	0.159	0.092	0.211	0.234	0.302	0.175	0.272	0.223	0.292	0.247	0.194	0.339	0.156	0.394	0.219	0.36	0.237	0.246	0.33	0.167
	0.131	0.143	0.176	0.171	0.209	0.109	0.199	0.216	0.208	0.152	0.194	0.119	0.137	0.111	0.231	0.136	0.118	0.113	0.128	0.204	0.221	0.26	0.288	0.212	0.176	0.171	0.175	0.262	0.226	0.353	0.219	0.185	0.186	0.223	0.196	0.123	0.208	0.297	0.308	0.151
	0.178	0.141	0.235	0.305	0.274	0.172	0.264	0.262	0.267	0.234	0.228	0.36	0.241	0.179	0.316	0.192	0.177	0.329	0.257	0.296	0.269	0.234	0.209	0.291	0.2	0.223	0.295	0.193	0.306	0.359	0.304	0.318	0.374	0.219	0.253	0.39	0.344	0.17	0.151	0.334
	0.13	0.28	0.23	0.16	0.12	0.14	0.1	0.23	0.2	0.11	0.05	0.12	0.22	0.1	0.13	0.06	0.14	0.13	0.12	0.11	0.2	0.22	0.2	0.18	0.11	0.14	0.18	0.13	0.12	0.18	0.2	0.15
	0.196	0.13	0.211	0.125	0.107	0.294	0.185	0.154	0.304	0.244	0.162	0.158	0.227	0.168	0.195	0.176	0.171	0.166	0.151	0.176	0.143	0.076	0.15
	0.22	0.186	0.14	0.142	0.178	0.155	0.182	0.16	0.111	0.123	0.173	0.189	0.148	0.162	0.187	0.125	0.112	0.159	0.13	0.185
	0.114	0.063	0.128	0.116	0.137	0.102	0.232	0.204	0.291	0.241	0.399	0.243	0.236	0.171	0.218	0.182	0.237	0.304	0.267	0.141	0.167	0.11	0.164	0.114	0.12	0.103
	0.12	0.16	0.15	0.12	0.16	0.11	0.1	0.12	0.11	0.13	0.11	0.07	0.19	0.21	0.15	0.17	0.08	0.11	0.06	0.14	0.11	0.19	0.23	0.12	0.12	0.11	0.15	0.12	0.12	0.15	0.11	0.2	0.24	0.17	0.19	0.12	0.2	0.17	0.23
	0.19	0.118	0.106	0.181	0.157	0.215	0.137	0.079	0.122	0.127	0.26	0.111	0.188	0.153	0.234	0.17	0.213	0.13	0.174	0.274	0.11	0.109	0.114	0.159	0.103	0.084	0.118	0.089	0.125	0.142	0.246	0.084	0.089	0.121	0.308	0.461	0.259	0.283	0.31	0.243	0.289	0.223	0.239	0.276	0.225	0.169	0.23	0.219	0.229
	0.1	0.23	0.14	0.15	0.11	0.11	0.19	0.17	0.26	0.15	0.18	0.17	0.14	0.25	0.23	0.25	0.21	0.17	0.24	0.1	0.11	0.15	0.27	0.1	0.1	0.09	0.17	0.17	0.17	0.15	0.24	0.12	0.17	0.19	0.17	0.18	0.18	0.11	0.14
	0.076	0.131	0.11	0.167	0.074	0.092	0.063	0.078	0.098	0.184	0.194	0.151	0.173	0.159	0.128	0.2	0.117	0.139	0.173
	0.085	0.175	0.127	0.099	0.336	0.158	0.141	0.224	0.194	0.211	0.29	0.216	0.103	0.279	0.081	0.269	0.163	0.172	0.127	0.122
	0.142	0.195	0.181	0.18	0.164	0.165	0.149	0.187	0.147	0.276	0.173	0.18	0.213	0.24	0.111	0.134	0.099	0.231	0.141	0.199
	0.193	0.097	0.188	0.182	0.273	0.085	0.142	0.212	0.183	0.16	0.172	0.2	0.212	0.191	0.236	0.202	0.263	0.25	0.133	0.289	0.238	0.219	0.177	0.131	0.332	0.219	0.38	0.193	0.141	0.139	0.205	0.182	0.146	0.131	0.145	0.143	0.16	0.363
	0.118	0.158	0.101	0.127	0.126	0.14	0.076	0.169	0.128	0.249	0.11	0.118	0.149	0.092	0.126	0.11	0.101	0.153	0.13	0.131	0.246	0.232	0.161	0.217	0.131	0.195	0.191	0.241	0.129	0.195	0.101	0.234	0.112	0.114	0.141	0.147	0.136	0.174	0.18	0.116	0.163	0.16	0.287	0.198	0.134	0.177	0.18	0.167	0.158
	0.143	0.137	0.17	0.21	0.12	0.192	0.216	0.207	0.201	0.093	0.094	0.214	0.141	0.161	0.199	0.088	0.257	0.239	0.132	0.171
	0.191	0.14	0.187	0.099	0.113	0.194	0.099	0.163	0.221	0.14	0.158	0.15	0.192	0.234	0.226	0.171	0.146	0.099	0.167	0.169
	0.167	0.124	0.209	0.261	0.147	0.124	0.09	0.12	0.228	0.203	0.159	0.086	0.105	0.213	0.252	0.199	0.198	0.165	0.173	0.109
	0.111	0.204	0.156	0.24	0.109	0.151	0.07	0.252	0.175	0.101	0.17	0.134	0.098	0.12	0.115	0.162	0.102	0.084	0.132	0.108
	0.154	0.109	0.107	0.124	0.084	0.083	0.124	0.17	0.105	0.095	0.214	0.093	0.173	0.168	0.168	0.128	0.137	0.118	0.186	0.144	0.221	0.166	0.096	0.122	0.168	0.194	0.184	0.134	0.15	0.375	0.145	0.159	0.127	0.174	0.179	0.194	0.191	0.177	0.437
	0.139	0.16	0.227	0.124	0.144	0.131	0.132	0.173	0.122	0.094	0.132	0.147	0.206	0.194	0.23	0.157	0.161	0.228	0.203	0.161	0.085	0.092	0.147	0.14	0.134	0.137	0.15	0.195	0.159	0.228	0.142	0.131	0.107	0.126	0.096	0.078	0.127	0.135	0.102	0.132	0.215	0.126	0.098	0.155	0.217	0.201	0.17	0.187	0.188
	0.301	0.457	0.173	0.188	0.173	0.407	0.361	0.277	0.237	0.259	0.126	0.325	0.208	0.38	0.149	0.183	0.162	0.26	0.242	0.225	0.296	0.265	0.269	0.259	0.214	0.269	0.249	0.256	0.239	0.145	0.195	0.121	0.27	0.176	0.209	0.276	0.172	0.173	0.205	0.124	0.341	0.399	0.203	0.242	0.29	0.199	0.126	0.25	0.203
	0.1	0.16	0.18	0.13	0.17	0.13	0.18	0.2	0.2	0.19	0.09	0.16	0.12	0.21	0.09	0.13	0.14	0.16	0.19	0.08
	0.214	0.253	0.241	0.217	0.37	0.223	0.142	0.287	0.307	0.161	0.202	0.202	0.256	0.142	0.285	0.272	0.277	0.245	0.235	0.231	0.22	0.196	0.247	0.134	0.164	0.34	0.294	0.143	0.332	0.206	0.269	0.272	0.312	0.228	0.163	0.289	0.258	0.139	0.135	0.192	0.144	0.144	0.145	0.177	0.085	0.204	0.206	0.16	0.188
	0.065	0.133	0.181	0.16	0.185	0.184	0.165	0.265	0.105	0.187	0.182	0.168	0.223	0.19	0.279	0.168	0.126	0.16	0.27	0.149
	0.249	0.368	0.308	0.105	0.191	0.137	0.281	0.185	0.161	0.1	0.178	0.177	0.18	0.09	0.063	0.227	0.105	0.136	0.116	0.156
	0.141	0.323	0.259	0.647	0.219	0.278	0.163	0.148	0.197	0.31	0.291	0.257	0.233	0.196	0.218	0.155	0.302	0.206	0.248	0.264	0.348	0.086	0.346	0.351	0.253	0.287	0.158	0.212	0.449	0.208	0.372	0.268	0.269	0.207	0.299	0.216	0.301	0.262
	0.08	0.146	0.151	0.159	0.11	0.318	0.16	0.226	0.316	0.196	0.248	0.173	0.203	0.152	0.15	0.157	0.123	0.17	0.142	0.206	0.297	0.337	0.258	0.408	0.391	0.132	0.318	0.208	0.112	0.195	0.267	0.607	0.231	0.165	0.22	0.352	0.245	0.2	0.287	0.247	0.216	0.2	0.228	0.161	0.222	0.155	0.251	0.21	0.402
	0.223	0.246	0.273	0.24	0.151	0.169	0.184	0.208	0.117	0.215	0.221	0.211	0.214	0.106	0.076	0.245	0.165	0.119
	0.151	0.15	0.092	0.187	0.172	0.222	0.28	0.249	0.212	0.126	0.172	0.178	0.137	0.126	0.208	0.102	0.099	0.094	0.116	0.125	0.198	0.15	0.307	0.173	0.161	0.22	0.111	0.136	0.124	0.068	0.141	0.207	0.214	0.179	0.211	0.172	0.379	0.177	0.128	0.213	0.267	0.207	0.21	0.301	0.305	0.225	0.281	0.233	0.302
	0.113	0.117	0.166	0.171	0.087	0.121	0.103	0.083	0.108	0.162	0.156	0.109	0.163	0.208	0.182	0.14	0.152	0.146	0.116	0.12
	0.108	0.132	0.217	0.172	0.168	0.163	0.096	0.177	0.267	0.149	0.173	0.159	0.18	0.137	0.119	0.149	0.121	0.173	0.062	0.076	0.162	0.109	0.089	0.099	0.099	0.131	0.201	0.283	0.116	0.106	0.191	0.158	0.116	0.13	0.127	0.181	0.14	0.154	0.134	0.146	0.426	0.276	0.206	0.185	0.126	0.266	0.197	0.136	0.188
	0.273	0.194	0.102	0.279	0.085	0.106	0.207	0.234	0.221	0.091	0.141	0.249	0.156	0.125	0.186	0.225	0.175	0.185	0.166	0.178	0.239	0.183	0.124	0.149	0.149	0.16	0.12	0.137	0.203	0.199	0.165	0.174	0.121	0.173	0.192	0.139	0.149	0.124	0.138	0.157
	0.096	0.148	0.236	0.107	0.155	0.101	0.088	0.142	0.207	0.079	0.321	0.162	0.214	0.261	0.16	0.172	0.196	0.326	0.209	0.157
	0.134	0.127	0.112	0.155	0.109	0.118	0.127	0.121	0.066	0.117	0.178	0.143	0.136	0.124	0.273	0.104	0.086	0.13	0.141	0.153	0.217	0.165	0.182	0.105	0.113	0.113	0.132	0.342	0.16
	0.125	0.19	0.263	0.222	0.123	0.165	0.227	0.267	0.194	0.215	0.224	0.313	0.214	0.355	0.301	0.219	0.209	0.215	0.203	0.187	0.071	0.295	0.199	0.098	0.156	0.171	0.154	0.203	0.261	0.168	0.241	0.322	0.422	0.326	0.47	0.285	0.315	0.449	0.278	0.198
	0.148	0.169	0.124	0.184	0.134	0.218	0.15	0.079	0.068	0.149	0.281	0.196	0.198	0.086	0.071	0.138	0.15	0.109	0.122	0.169	0.115	0.109	0.193	0.206	0.113	0.172	0.173	0.199
	0.103	0.152	0.159	0.176	0.111	0.188	0.099	0.09	0.18	0.16	0.11	0.24	0.17	0.15	0.19	0.31	0.26	0.28	0.37	0.26	0.4	0.19	0.21	0.32	0.17	0.19	0.29	0.3
	0.265	0.122	0.11	0.12	0.187	0.156	0.125	0.14	0.168	0.137	0.107	0.182	0.168	0.113	0.182	0.144	0.146	0.122	0.124	0.21	0.234	0.186	0.249	0.212	0.188	0.187	0.201	0.177	0.243	0.226	0.174	0.224	0.128	0.183	0.258	0.225	0.161	0.115	0.133	0.16	0.188	0.209	0.142	0.139	0.248	0.229	0.106	0.182	0.207
	0.314	0.243	0.391	0.309	0.268	0.228	0.159	0.215	0.302	0.295	0.269	0.338	0.211	0.168	0.368	0.221	0.339	0.238	0.267	0.082
	0.271	0.153	0.15	0.102	0.169	0.13	0.222	0.425	0.268	0.161	0.144	0.166	0.207	0.204	0.27	0.286	0.257	0.278	0.286	0.281	0.21	0.321	0.304	0.243	0.109	0.287	0.289	0.169	0.294	0.125	0.145	0.1	0.178	0.128	0.144	0.217	0.324	0.202	0.156	0.164	0.181	0.145	0.17	0.198	0.133	0.162	0.168	0.239	0.328
	0.129	0.182	0.116	0.099	0.132	0.14	0.082	0.153	0.18	0.162	0.146	0.184	0.18	0.336	0.166	0.133	0.132	0.118	0.212	0.117	0.26	0.23	0.17	0.1	0.13	0.29	0.11	0.15	0.17	0.18	0.14	0.09	0.26	0.22	0.13	0.28	0.13	0.31	0.34	0.1	0.15	0.29	0.2	0.29	0.27	0.25	0.23	0.29	0.26
	0.107	0.214	0.154	0.094	0.135	0.158	0.245	0.132	0.118	0.214	0.168	0.112	0.159	0.078	0.146	0.132	0.185	0.117	0.142	0.22
	0.147	0.118	0.135	0.247	0.09	0.14	0.186	0.123	0.122	0.229	0.18	0.208	0.089	0.084	0.107	0.144	0.207	0.141	0.356	0.126	0.098	0.16	0.131	0.12	0.121	0.171	0.11	0.166	0.138	0.125	0.104	0.11	0.165	0.148	0.097	0.161	0.18	0.115	0.104	0.104
	0.263	0.227	0.191	0.171	0.189	0.167	0.193	0.248	0.197	0.324	0.167	0.153	0.187	0.137	0.243	0.119	0.189	0.184	0.15	0.21
	0.225	0.298	0.14	0.122	0.239	0.124	0.176	0.205	0.132	0.243	0.199	0.209	0.238	0.213	0.15	0.186	0.289	0.186	0.165	0.198	0.195	0.296	0.258	0.263	0.247	0.284	0.262	0.227	0.178	0.107	0.171	0.112	0.113	0.194	0.105	0.107	0.208	0.133	0.188	0.193	0.165	0.202	0.259	0.178	0.272	0.162	0.075	0.119	0.149
	0.12	0.133	0.133	0.111	0.071	0.126	0.096	0.115	0.116	0.058	0.235	0.084	0.173	0.095	0.216	0.119	0.238	0.114	0.202	0.131
	0.176	0.108	0.148	0.231	0.215	0.151	0.197	0.23	0.16	0.094	0.206	0.098	0.284	0.205	0.241	0.107	0.318	0.164	0.067	0.081
	0.158	0.287	0.211	0.228	0.288	0.252	0.291	0.212	0.212	0.386	0.264	0.391	0.256	0.209	0.316	0.125	0.244	0.298	0.247	0.127	0.234	0.559	0.166	0.178	0.182	0.36	0.412	0.151	0.281	0.192	0.327	0.379	0.271	0.19	0.247	0.244	0.407
	0.276	0.211	0.136	0.134	0.064	0.098	0.069	0.311	0.127	0.207	0.08	0.105	0.21	0.209	0.092	0.099	0.192	0.158	0.166	0.085	0.26	0.1	0.17	0.22	0.17	0.13	0.15	0.26	0.17	0.18	0.12	0.22	0.32	0.21	0.19	0.26	0.26	0.23	0.39	0.21
	0.09	0.05	0.15	0.11	0.13	0.14	0.1	0.13
	0.149	0.131	0.166	0.095	0.181	0.122	0.121	0.127	0.151	0.144	0.135	0.138	0.128	0.114	0.122	0.148	0.084	0.124	0.191	0.211	0.178	0.138	0.143	0.127	0.118	0.166	0.139	0.214	0.144	0.152	0.174	0.113	0.282	0.107	0.143	0.112	0.122	0.121	0.147	0.131
	0.206	0.153	0.241	0.148	0.219	0.198	0.113	0.204	0.135	0.158	0.177	0.208	0.132	0.15	0.179	0.176	0.155	0.215	0.128	0.143	0.167	0.109	0.178	0.189	0.21	0.24	0.174	0.234	0.148	0.284
	0.19	0.4	0.24	0.28	0.19	0.29	0.21	0.09	0.09	0.1	0.14	0.11	0.22	0.11	0.14	0.13	0.15	0.12	0.14	0.24	0.18	0.52	0.16	0.13	0.2	0.27	0.17	0.2	0.24	0.16	0.21	0.28	0.22	0.15
	0.12	0.23	0.08	0.25	0.24	0.31	0.24	0.14	0.13	0.11	0.12	0.13	0.09	0.16	0.13	0.09	0.16	0.13	0.17	0.08	0.176	0.109	0.111	0.161	0.1	0.15
	0.23	0.18	0.18	0.29	0.23	0.23	0.37	0.23	0.08	0.16	0.12	0.11	0.13	0.23	0.11	0.11	0.07	0.13	0.1	0.17	0.2	0.21	0.1	0.18	0.16	0.29	0.17	0.11	0.1	0.14	0.26	0.19	0.09	0.27	0.26	0.16	0.23	0.23	0.25	0.18	0.103	0.123	0.114	0.088	0.127	0.068	0.086	0.101	0.116
	0.133	0.122	0.208	0.284	0.142	0.11	0.198	0.12	0.157	0.164	0.14	0.118	0.149	0.127	0.104	0.157	0.174	0.163	0.133	0.11	0.352	0.205	0.063	0.097	0.122	0.119	0.103	0.125	0.117	0.244	0.082	0.109	0.175	0.121	0.33	0.159	0.145	0.147	0.172	0.113	0.137	0.197	0.176	0.284	0.202	0.128	0.192	0.096	0.17
	0.264	0.22	0.128	0.188	0.342	0.223	0.28	0.264	0.372	0.176	0.179	0.275	0.262	0.257	0.352	0.259	0.136	0.244	0.298	0.217	0.311	0.25	0.268	0.174	0.252	0.362	0.215	0.343	0.209	0.2	0.153
	0.343	0.174	0.317	0.142	0.202	0.081	0.092	0.179	0.165	0.259	0.251	0.251	0.312	0.117	0.224	0.149	0.168	0.186	0.09	0.306
	0.171	0.161	0.102	0.132	0.15	0.106	0.165	0.219	0.16	0.135	0.191	0.212	0.128	0.185	0.163	0.101	0.097	0.202	0.116	0.402
	0.465	0.315	0.328	0.194	0.209	0.282	0.154	0.106	0.179	0.25	0.118	0.176	0.177	0.136	0.233	0.092	0.129	0.265	0.196	0.174
	0.356	0.172	0.41	0.172	0.112	0.135	0.102	0.117	0.122	0.086	0.066	0.12	0.12	0.27	0.219	0.078	0.123	0.081	0.116	0.15	0.084	0.3	0.105	0.211	0.162	0.233	0.229	0.306	0.28	0.119	0.292	0.175	0.347	0.257	0.269	0.309	0.24	0.322	0.318	0.274	0.355	0.193	0.277	0.2
	0.164	0.185	0.187	0.217	0.311	0.298	0.345	0.138	0.127	0.384	0.169	0.111	0.164	0.186	0.149	0.22	0.117	0.099	0.146	0.177	0.163	0.144	0.11	0.127	0.105	0.149	0.116	0.106	0.13	0.164	0.108	0.134	0.139	0.121	0.1	0.12	0.141	0.159	0.112	0.166
	0.13	0.116	0.211	0.175	0.092	0.093	0.117	0.272	0.226	0.103	0.104	0.121	0.087	0.117	0.135	0.126	0.082	0.112	0.159	0.264
	0.154	0.188	0.123	0.126	0.18	0.203	0.116	0.174	0.095	0.113	0.14	0.13	0.12	0.17	0.14	0.15	0.15	0.18	0.13	0.13	0.16	0.2	0.21	0.12	0.12	0.13	0.14	0.2	0.16	0.22	0.17	0.11	0.15	0.17	0.09	0.12	0.14	0.16	0.12
	0.09	0.12	0.11	0.1	0.09	0.17	0.11	0.15	0.07	0.15	0.07	0.09	0.12	0.05	0.16	0.16	0.08	0.14	0.14	0.1	0.2	0.24	0.27	0.15	0.21	0.35	0.18	0.22	0.35	0.15	0.15	0.17	0.18	0.16	0.22	0.18	0.15	0.16	0.24	0.13
	0.122	0.192	0.39	0.126	0.073	0.102	0.146	0.082	0.091	0.088	0.104	0.059	0.145	0.122	0.123	0.101	0.113	0.101	0.11	0.121
	0.133	0.159	0.095	0.166	0.195	0.186	0.164	0.111	0.194	0.172	0.192	0.165	0.146	0.144	0.174	0.336	0.148	0.174	0.083	0.142	0.155	0.16	0.149	0.137	0.178	0.274	0.16	0.139	0.154	0.246	0.167	0.274	0.188	0.17	0.124	0.118	0.113	0.099	0.123	0.223	0.247	0.141	0.227	0.234	0.174	0.239	0.277	0.212	0.241
	0.153	0.2	0.241	0.262	0.107	0.307	0.364	0.3	0.134	0.176	0.383	0.274	0.201	0.185	0.402	0.275	0.204	0.219	0.43	0.23
	0.213	0.173	0.157	0.112	0.199	0.156	0.181	0.227	0.196	0.204	0.133	0.158	0.16	0.156	0.192	0.14	0.144	0.174	0.141	0.163	0.107	0.15	0.196	0.144	0.177	0.099	0.084	0.167	0.133	0.056	0.081	0.068	0.16	0.138	0.142	0.212	0.11	0.113	0.136	0.166	0.304	0.14	0.19	0.168	0.086	0.19	0.275	0.192	0.179
	0.1	0.174	0.301	0.11	0.117	0.091	0.189	0.165	0.162	0.265	0.113	0.155	0.135	0.192	0.161	0.137	0.151	0.114	0.356	0.12
	0.248	0.131	0.163	0.228	0.344	0.258	0.27	0.151	0.244	0.147	0.22	0.119	0.167	0.298	0.317	0.285	0.314	0.359	0.24	0.369
	0.229	0.232	0.386	0.369	0.153	0.155	0.246	0.159	0.155	0.191	0.353	0.268	0.366	0.133	0.297	0.217	0.189	0.153	0.125	0.13	0.21	0.23	0.24	0.28	0.21	0.3	0.23	0.26	0.22	0.14	0.15	0.32	0.32	0.36	0.14	0.12	0.28	0.19	0.34	0.15	0.19	0.21	0.12	0.12	0.15	0.17	0.13	0.2	0.17
	0.13	0.13	0.07	0.17	0.19	0.12	0.18	0.17	0.17	0.06	0.14	0.14	0.13	0.24	0.12	0.16	0.22	0.15	0.17	0.09	0.1	0.08	0.09	0.14	0.14	0.13	0.13	0.12	0.11	0.2	0.12	0.13	0.12	0.12	0.16	0.15	0.12	0.1	0.1	0.11	0.12	0.11	0.11	0.15	0.14	0.15	0.13	0.17	0.14
	0.111	0.136	0.151	0.153	0.16	0.102	0.069	0.084	0.129	0.148	0.09	0.139	0.188	0.105	0.042	0.097	0.12	0.152	0.176	0.21	0.138	0.123	0.374	0.479	0.15	0.327	0.237	0.126
	0.306	0.152	0.206	0.312	0.182	0.345	0.201	0.221	0.235	0.262	0.165	0.123	0.311	0.193	0.207	0.197	0.152	0.151	0.16
	0.172	0.132	0.145	0.097	0.094	0.181	0.083	0.084	0.156	0.124	0.126	0.145	0.19	0.151	0.137	0.192	0.133	0.139	0.093	0.098
	0.278	0.268	0.232	0.123	0.25	0.233	0.35	0.433	0.397	0.303	0.3	0.235	0.293	0.117	0.109	0.177	0.258	0.197
	0.386	0.144	0.231	0.186	0.126	0.215	0.237	0.159	0.246	0.296	0.11	0.177	0.194	0.084	0.238	0.236	0.147	0.108	0.144	0.128	0.153	0.11	0.132	0.242	0.18	0.113	0.142	0.137	0.068	0.123	0.136	0.153	0.185	0.147	0.088	0.155	0.119	0.094	0.117	0.106	0.085	0.241	0.157	0.181	0.098	0.175	0.122	0.156	0.127
	0.159	0.209	0.308	0.189	0.239	0.183	0.193	0.259	0.197	0.249	0.296	0.153	0.286	0.211	0.284	0.302	0.14	0.194	0.199	0.216	0.24	0.1	0.19	0.1	0.15	0.09	0.13	0.14	0.16	0.08	0.12	0.14	0.16	0.14	0.21	0.18	0.16	0.16	0.15	0.21	0.18	0.11	0.11	0.27	0.2	0.35	0.37	0.26	0.15
	0.217	0.272	0.175	0.076	0.126	0.212	0.155	0.145	0.225	0.097	0.175	0.272	0.209	0.132	0.123	0.136	0.164	0.186	0.148	0.081	0.235	0.218	0.175	0.192	0.232	0.191	0.399	0.35	0.17	0.238	0.309	0.212	0.126	0.22	0.304	0.232	0.261	0.155	0.208	0.221	0.27	0.124	0.202	0.168	0.21	0.287	0.302	0.285	0.243
	0.179	0.542	0.201	0.143	0.195	0.145	0.34	0.225	0.164	0.202	0.191	0.186	0.145	0.156	0.235	0.166	0.071
	0.173	0.313	0.225	0.241	0.336	0.279	0.148	0.263	0.334	0.321	0.109	0.199	0.252	0.19	0.152	0.206	0.266	0.106	0.232	0.301
	0.08	0.16	0.185	0.172	0.161	0.155	0.263	0.175	0.208	0.192	0.089	0.18	0.173	0.094	0.17	0.176	0.195	0.099	0.151	0.137
	0.166	0.202	0.299	0.146	0.208	0.114	0.155	0.256	0.132	0.249	0.231	0.191	0.269	0.137	0.222	0.137	0.211	0.276	0.179	0.183	0.136	0.117	0.199	0.136	0.148
	0.295	0.283	0.175	0.122	0.26	0.154	0.237	0.202	0.266	0.202	0.15	0.19	0.172	0.253	0.526	0.299	0.171	0.195	0.134	0.132	0.14	0.2	0.11	0.19	0.17	0.2	0.15	0.15	0.14	0.16	0.15	0.29	0.25	0.2	0.12	0.11	0.11	0.13	0.22	0.2	0.2	0.14	0.16	0.13	0.14	0.18	0.22	0.11	0.25
	0.12	0.07	0.11	0.11	0.15	0.13	0.14	0.08	0.09	0.16	0.147	0.175	0.096	0.08	0.177	0.193
	0.128	0.255	0.149	0.132	0.2	0.111	0.124	0.109	0.134	0.251	0.257	0.121	0.089	0.225	0.175	0.233	0.114	0.247	0.118	0.166
	0.164	0.194	0.13	0.145	0.131	0.129	0.135	0.117	0.082	0.076	0.183	0.164	0.128	0.059	0.147	0.1	0.099	0.075	0.133	0.109
	0.1	0.16	0.26	0.23	0.15	0.13	0.25	0.12	0.14	0.14	0.12	0.18	0.15	0.15	0.11	0.14	0.17	0.13	0.12	0.12	0.27	0.19	0.19	0.15	0.15	0.13	0.13	0.16	0.09	0.27	0.28	0.21	0.21	0.17	0.18	0.24	0.17	0.26	0.22	0.17
	0.089	0.073	0.122	0.247	0.118	0.186	0.099	0.169	0.169	0.112	0.152
	0.208	0.173	0.15	0.218	0.153	0.209	0.126	0.189	0.153	0.146	0.156	0.134	0.211	0.187	0.263	0.214	0.172	0.211	0.112	0.185
	0.176	0.086	0.185	0.126	0.108	0.167	0.206	0.161	0.101	0.139	0.126	0.117	0.259	0.234	0.117	0.103	0.126	0.131	0.109	0.085	0.141	0.108	0.222	0.125	0.15	0.19	0.112	0.099	0.166
	0.14	0.17	0.12	0.14	0.09	0.15	0.16	0.25	0.26	0.17	0.1	0.22	0.11	0.12	0.18	0.09	0.1	0.3	0.15	0.17	0.11	0.12	0.1	0.18	0.11	0.14	0.13	0.19	0.2	0.14	0.17	0.13	0.15	0.08	0.17	0.09	0.21	0.15	0.25	0.15
	0.158	0.165	0.158	0.15	0.152	0.224	0.161	0.253	0.168	0.254	0.16	0.274	0.332	0.361	0.199	0.279	0.396	0.207	0.254	0.222	0.236	0.13	0.19	0.228	0.168	0.17	0.179
	0.142	0.082	0.13	0.116	0.104	0.131	0.104	0.111	0.096	0.092	0.138	0.211	0.119	0.176	0.162	0.225	0.132	0.127	0.163	0.101	0.11	0.21	0.19	0.15	0.16	0.16	0.17	0.17	0.07	0.26	0.14	0.16	0.09	0.1	0.15	0.15	0.11	0.17	0.08	0.07	0.102	0.088	0.1	0.214	0.125	0.226	0.162	0.199	0.107
	0.175	0.181	0.112	0.097	0.052	0.156	0.208	0.197	0.109	0.094	0.118	0.167	0.191	0.236	0.214	0.172	0.123	0.1	0.121	0.107	0.237	0.188	0.185	0.151	0.115	0.16	0.16	0.121	0.174	0.169	0.185	0.069	0.117	0.139	0.183	0.164	0.288	0.094	0.124
	0.151587	0.0403879
	0.17163	0.0457049
	0.169552	0.0629788
	0.169139	0.0700093
	0.155	0.0654339
	0.165974	0.0521414
	0.249	0.0753083
	0.205392	0.108997
	0.149321	0.0569041
	0.17595	0.0601971
	0.182222	0.075785
	0.176456	0.0633845
	0.201299	0.075418
	0.164	0.0179444
	0.189513	0.0554058
	0.264267	0.0745323
	0.160276	0.0541463
	0.152	0.0526009
	0.218582	0.100153
	0.162433	0.0466319
	0.1758	0.0593966
	0.184375	0.0656352
	0.165392	0.0531545
	0.193769	0.0683957
	0.163462	0.0494745
	0.1512	0.0401335
	0.1518	0.0513211
	0.1976	0.0611366
	0.136775	0.0374778
	0.145325	0.0368604
	0.16925	0.0654771
	0.168967	0.0508246
	0.149188	0.0470798
	0.11965	0.0311064
	0.1692	0.0508326
	0.153962	0.0373007
	0.154667	0.0522471
	0.1839	0.0799512
	0.205895	0.0686002
	0.2265	0.0954594
	0.189538	0.0649108
	0.17155	0.0667083
	0.161217	0.0787728
	0.15395	0.037306
	0.26	0.0929516
	0.143775	0.0395588
	0.249433	0.0923878
	0.169222	0.055217
	0.13975	0.0352505
	0.168782	0.0649838
	0.158375	0.047661
	0.1634	0.0679593
	0.15285	0.0412697
	0.324075	0.0680258
	0.289231	0.111958
	0.25665	0.0903933
	0.155471	0.0347043
	0.1488	0.0363022
	0.145359	0.0416764
	0.252167	0.078308
	0.1995	0.0982193
	0.230425	0.0943773
	0.16475	0.0551449
	0.1688	0.0596204
	0.15465	0.0538642
	0.15255	0.0437318
	0.15215	0.0551059
	0.187625	0.0619895
	0.176943	0.0555719
	0.234564	0.0810655
	0.134275	0.0406082
	0.21556	0.0689463
	0.13135	0.0333455
	0.156175	0.0545071
	0.157067	0.0417686
	0.1511	0.0600017
	0.134857	0.0418033
	0.164898	0.0566141
	0.150275	0.0323292
	0.171429	0.113256
	0.14255	0.0434281
	0.1309	0.0470765
	0.15965	0.0563189
	0.155613	0.0572763
	0.14585	0.0430242
	0.1566	0.0512788
	0.14585	0.0289214
	0.144875	0.0405773
	0.1711	0.0759628
	0.14545	0.0544624
	0.184692	0.0636992
	0.157719	0.0618501
	0.1888	0.0633574
	0.166938	0.074944
	0.1516	0.0405869
	0.155667	0.0523664
	0.1481	0.0664046
	0.1611	0.069774
	0.14425	0.0513279
	0.160263	0.0385614
	0.22865	0.0918431
	0.208697	0.0791275
	0.17	0.0823273
	0.13115	0.0344418
	0.143225	0.0492271
	0.18265	0.0669047
	0.193067	0.0601721
	0.174638	0.0626629
	0.151133	0.0472454
	0.196556	0.0643354
	0.1587	0.0486679
	0.200375	0.082531
	0.162854	0.0498466
	0.151769	0.058293
	0.157125	0.0584927
	0.1831	0.0620619
	0.148	0.051565
	0.192739	0.0637996
	0.150033	0.0463421
	0.161026	0.0493001
	0.153675	0.0471885
	0.15775	0.0481291
	0.12995	0.0289402
	0.140482	0.0463293
	0.255923	0.0757754
	0.191125	0.0583962
	0.258575	0.0654683
	0.152813	0.052501
	0.176913	0.0533606
	0.15835	0.0294605
	0.184769	0.0787473
	0.144103	0.0444687
	0.184731	0.0772003
	0.167436	0.0506649
	0.131947	0.0438159
	0.1786	0.0729776
	0.17535	0.0433423
	0.197553	0.0663808
	0.150433	0.045147
	0.16925	0.0495983
	0.16295	0.0410269
	0.1666	0.0528398
	0.1397	0.0493858
	0.160949	0.0684624
	0.1543	0.041639
	0.214673	0.0774814
	0.1505	0.0404547
	0.211076	0.0616502
	0.17725	0.0529487
	0.17565	0.078451
	0.261763	0.0969649
	0.197283	0.0764185
	0.187944	0.0555904
	0.199467	0.0723713
	0.13615	0.0333913
	0.192154	0.0915986
	0.169325	0.0473413
	0.17685	0.0708514
	0.144241	0.0550446
	0.237825	0.0881543
	0.150821	0.0495857
	0.208143	0.0829947
	0.166885	0.0496808
	0.26125	0.075293
	0.220513	0.0795891
	0.195915	0.0717674
	0.1515	0.0449918
	0.145175	0.0517037
	0.19545	0.0475599
	0.19353	0.0527013
	0.1343	0.051913
	0.17405	0.0690267
	0.264378	0.0919436
	0.181225	0.0750195
	0.1125	0.0324037
	0.143825	0.035945
	0.179033	0.0415497
	0.196176	0.0888654
	0.150654	0.0591229
	0.164547	0.0685017
	0.155945	0.0596916
	0.247516	0.0655448
	0.2004	0.0799733
	0.1649	0.0672677
	0.2089	0.089918
	0.204182	0.0932579
	0.1627	0.0662374
	0.1421	0.0576677
	0.148769	0.0325014
	0.15825	0.0673257
	0.12555	0.0686382
	0.175847	0.0512791
	0.25235	0.090218
	0.180667	0.0727304
	0.1654	0.0691013
	0.2436	0.0775788
	0.209767	0.0765204
	0.142162	0.0472431
	0.161286	0.0937952
	0.214789	0.0644253
	0.1336	0.0343471
	0.252944	0.0894253
	0.158327	0.0600979
	0.19863	0.0713602
	0.2162	0.0697754
	0.205059	0.102791
	0.2323	0.0713731
	0.16075	0.0442622
	0.18796	0.0534388
	0.201633	0.0788936
	0.12675	0.0382788
	0.1669	0.0580797
	0.125	0.0362941
	0.17275	0.0520841
	0.139636	0.050747
	0.1785	0.0377003
	0.143966	0.0453742
	0.154	0.051231
	0.215852	0.0678209
	0.143817	0.0481183
	0.152641	0.0494882
[truncated: 111 more columns]
