# Supplementary material for: Decoys provide a scalable platform for the identification of plant E3 ubiquitin ligases that regulate circadian function
Source: eLife. 2019 Apr 5;8:e44558. doi: 10.7554/eLife.44558 (PMC6483598; doi:10.7554/eLife.44558)
Supplement: Supplementary file 4. [file elife-44558-supp4.xlsx]

## Sheet: Seed Stocks
ABRC stock number	Description
CS71831	pB7HFN-AT1G09650decoy
CS71832	pK7HFN-AT1G09650decoy
CS71833	pB7HFN-AT1G10780decoy
CS71834	pK7HFN-AT1G10780decoy
CS71835	pB7HFN-AT1G11620decoy
CS71836	pK7HFN-AT1G12710decoy
CS71837	pB7HFN-AT1G12710decoy
CS71838	pK7HFN-AT1G12820decoy
CS71839	pB7HFN-AT1G13570decoy
CS71840	pK7HFN-AT1G13570decoy
CS71841	pB7HFN-AT1G14330decoy
CS71842	pB7HFN-AT1G15670decoy
CS71843	pK7HFN-AT1G15670decoy
CS71844	pB7HFN-AT1G15680decoy
CS71845	pK7HFN-AT1G15680decoy
CS71846	pB7HFN-AT1G16250decoy
CS71847	pK7HFN-AT1G19070decoy
CS71848	pB7HFN-AT1G19070decoy
CS71849	pK7HFN-AT1G19160decoy
CS71850	pB7HFN-AT1G19160decoy
CS71851	pB7HFN-AT1G19460decoy
CS71852	pK7HFN-AT1G19460decoy
CS71853	pB7HFN-AT1G20800decoy
CS71854	pB7HFN-AT1G20940decoy
CS71855	pK7HFN-AT1G21410decoy
CS71856	pK7HFN-AT1G21760decoy
CS71857	pB7HFN-AT1G21760decoy
CS71858	pK7HFN-AT1G22040decoy
CS71859	pB7HFN-AT1G22040decoy
CS71860	pK7HFN-AT1G22220decoy
CS71861	pB7HFN-AT1G22220decoy
CS71862	pB7HFN-AT1G23780decoy
CS71863	pB7HFN-AT1G26930decoy
CS71864	pK7HFN-AT1G27340decoy
CS71865	pB7HFN-AT1G27340decoy
CS71866	pK7HFN-AT1G27420decoy
CS71867	pB7HFN-AT1G27420decoy
CS71868	pB7HFN-AT1G30090decoy
CS71869	pK7HFN-AT1G30200decoy
CS71870	pB7HFN-AT1G30200decoy
CS71871	pK7HFN-AT1G30950decoy
CS71872	pB7HFN-AT1G31000decoy
CS71873	pK7HFN-AT1G31080decoy
CS71874	pB7HFN-AT1G31080decoy
CS71875	pK7HFN-AT1G31350decoy
CS71876	pB7HFN-AT1G31350decoy
CS71877	pB7HFN-AT1G32020decoy
CS71878	pK7HFN-AT1G32375decoy
CS71879	pB7HFN-AT1G32375decoy
CS71880	pK7HFN-AT1G32430decoy
CS71881	pB7HFN-AT1G47056decoy
CS71882	pK7HFN-AT1G47056decoy
CS71883	pB7HFN-AT1G47270decoy
CS71884	pK7HFN-AT1G47270decoy
CS71885	pB7HFN-AT1G47730decoy
CS71886	pK7HFN-AT1G47790decoy
CS71887	pB7HFN-AT1G47810decoy
CS71888	pB7HFN-AT1G50870decoy
CS71889	pK7HFN-AT1G50870decoy
CS71890	pB7HFN-AT1G51320decoy
CS71891	pK7HFN-AT1G51320decoy
CS71892	pB7HFN-AT1G51370decoy
CS71893	pK7HFN-AT1G51550decoy
CS71894	pB7HFN-AT1G51550decoy
CS71895	pK7HFN-AT1G53320decoy
CS71896	pB7HFN-AT1G53320decoy
CS71897	pK7HFN-AT1G53790decoy
CS71898	pB7HFN-AT1G54550decoy
CS71899	pK7HFN-AT1G55000decoy
CS71900	pB7HFN-AT1G55000decoy
CS71901	pB7HFN-AT1G55030decoy
CS71902	pK7HFN-AT1G55270decoy
CS71903	pB7HFN-AT1G55270decoy
CS71904	pK7HFN-AT1G59680decoy
CS71905	pB7HFN-AT1G60400decoy
CS71906	pK7HFN-AT1G60570decoy
CS71907	pB7HFN-AT1G60570decoy
CS71908	pB7HFN-AT1G61330decoy
CS71909	pK7HFN-AT1G61330decoy
CS71910	pB7HFN-AT1G63090decoy
CS71911	pK7HFN-AT1G63090decoy
CS71912	pB7HFN-AT1G65740decoy
CS71913	pK7HFN-AT1G67190decoy
CS71914	pB7HFN-AT1G74510decoy
CS71915	pK7HFN-AT1G76920decoy
CS71916	pB7HFN-AT1G76920decoy
CS71917	pK7HFN-AT1G77000decoy
CS71918	pB7HFN-AT1G77000decoy
CS71919	pB7HFN-AT1G78100decoy
CS71920	pK7HFN-AT1G78280decoy
CS71921	pK7HFN-AT1G78750decoy
CS71922	pB7HFN-AT1G78760decoy
CS71923	pK7HFN-AT1G78760decoy
CS71924	pB7HFN-AT1G80110decoy
CS71925	pK7HFN-AT1G80440decoy
CS71926	pB7HFN-AT1G80440decoy
CS71927	pK7HFN-AT1G80570decoy
CS71928	pB7HFN-AT1G80570decoy
CS71929	pK7HFN-AT1G80960decoy
CS71930	pB7HFN-AT2G01620decoy
CS71931	pK7HFN-AT2G02300decoy
CS71932	pB7HFN-AT2G02300decoy
CS71933	pB7HFN-AT2G02340decoy
CS71934	pK7HFN-AT2G02350decoy
CS71935	pB7HFN-AT2G02350decoy
CS71936	pB7HFN-AT2G02360decoy
CS71937	pK7HFN-AT2G02870decoy
CS71938	pB7HFN-AT2G02870decoy
CS71939	pK7HFN-AT2G17030decoy
CS71940	pB7HFN-AT2G18280decoy
CS71941	pK7HFN-AT2G18280decoy
CS71942	pB7HFN-AT2G18780decoy
CS71943	pK7HFN-AT2G21680decoy
CS71944	pB7HFN-AT2G22030decoy
CS71945	pK7HFN-AT2G22030decoy
CS71946	pK7HFN-AT2G24540decoy
CS71947	pB7HFN-AT2G24540decoy
CS71948	pK7HFN-AT2G26030decoy
CS71949	pB7HFN-AT2G26030decoy
CS71950	pB7HFN-AT2G29770decoy
CS71951	pK7HFN-AT2G29770decoy
CS71952	pB7HFN-AT2G29910decoy
CS71953	pK7HFN-AT2G29910decoy
CS71954	pB7HFN-AT2G32560decoy
CS71955	pK7HFN-AT2G32560decoy
CS71956	pB7HFN-AT2G36090decoy
CS71957	pK7HFN-AT2G36090decoy
CS71958	pB7HFN-AT2G39490decoy
CS71959	pB7HFN-AT2G40920decoy
CS71960	pK7HFN-AT2G41170decoy
CS71961	pB7HFN-AT2G41170decoy
CS71962	pK7HFN-AT2G44030decoy
CS71963	pB7HFN-AT2G44030decoy
CS71964	pK7HFN-AT2G44130decoy
CS71965	pB7HFN-AT2G44130decoy
CS71966	pK7HFN-AT2G44630decoy
CS71967	pB7HFN-AT2G44630decoy
CS71968	pB7HFN-AT2G44700decoy
CS71969	pK7HFN-AT3G03030decoy
CS71970	pB7HFN-AT3G03360decoy
CS71971	pK7HFN-AT3G03360decoy
CS71972	pK7HFN-AT3G06380decoy
CS71973	pK7HFN-AT3G06570decoy
CS71974	pB7HFN-AT3G06570decoy
CS71975	pK7HFN-AT3G07550decoy
CS71976	pB7HFN-AT3G07550decoy
CS71977	pB7HFN-AT3G07870decoy
CS71978	pK7HFN-AT3G08750decoy
CS71979	pB7HFN-AT3G12350decoy
CS71980	pK7HFN-AT3G12350decoy
CS71981	pB7HFN-AT3G16740decoy
CS71982	pK7HFN-AT3G16740decoy
CS71983	pB7HFN-AT3G17710decoy
CS71984	pK7HFN-AT3G18910decoy
CS71985	pB7HFN-AT3G18910decoy
CS71986	pK7HFN-AT3G18980decoy
CS71987	pB7HFN-AT3G18980decoy
CS71988	pK7HFN-AT3G21410decoy
CS71989	pB7HFN-AT3G22350decoy
CS71990	pB7HFN-AT3G23880decoy
CS71991	pK7HFN-AT3G24760decoy
CS71992	pB7HFN-AT3G24760decoy
CS71993	pK7HFN-AT3G26000decoy
CS71994	pB7HFN-AT3G26000decoy
CS71995	pK7HFN-AT3G26920decoy
CS71996	pB7HFN-AT3G26920decoy
CS71997	pB7HFN-AT3G27150decoy
CS71998	pK7HFN-AT3G27150decoy
CS71999	pK7HFN-AT3G49480decoy
CS72000	pB7HFN-AT3G50080decoy
CS72001	pK7HFN-AT3G50080decoy
CS72002	pB7HFN-AT3G52680decoy
CS72003	pK7HFN-AT3G53000decoy
CS72004	pB7HFN-AT3G54480decoy
CS72005	pB7HFN-AT3G54650decoy
CS72006	pK7HFN-AT3G54650decoy
CS72007	pB7HFN-AT3G58880decoy
CS72008	pK7HFN-AT3G58900decoy
CS72009	pB7HFN-AT3G58930decoy
CS72010	pK7HFN-AT3G59000decoy
CS72011	pB7HFN-AT3G59210decoy
CS72012	pK7HFN-AT3G59210decoy
CS72013	pK7HFN-AT3G59940decoy
CS72014	pB7HFN-AT3G59940decoy
CS72015	pK7HFN-AT3G61060decoy
CS72016	pB7HFN-AT3G61060decoy
CS72017	pK7HFN-AT3G61590decoy
CS72018	pK7HFN-AT3G62980decoy
CS72019	pB7HFN-AT3G63220decoy
CS72020	pK7HFN-AT4G00755decoy
CS72021	pB7HFN-AT4G00755decoy
CS72022	pK7HFN-AT4G02440decoy
CS72023	pB7HFN-AT4G02440decoy
CS72024	pK7HFN-AT4G02740decoy
CS72025	pB7HFN-AT4G03190decoy
CS72026	pK7HFN-AT4G03190decoy
CS72027	pK7HFN-AT4G05470decoy
CS72028	pK7HFN-AT4G08980decoy
CS72029	pB7HFN-AT4G08980decoy
CS72030	pK7HFN-AT4G09920decoy
CS72031	pB7HFN-AT4G09920decoy
CS72032	pK7HFN-AT4G10400decoy
CS72033	pB7HFN-AT4G14096decoy
CS72034	pK7HFN-AT4G14096decoy
CS72035	pB7HFN-AT4G14905decoy
CS72036	pK7HFN-AT4G14905decoy
CS72037	pK7HFN-AT4G15475decoy
CS72038	pK7HFN-AT4G19870decoy
CS72039	pB7HFN-AT4G19870decoy
CS72040	pK7HFN-AT4G21240decoy
CS72041	pB7HFN-AT4G21240decoy
CS72042	pK7HFN-AT4G22390decoy
CS72043	pB7HFN-AT4G29370decoy
CS72044	pK7HFN-AT4G29370decoy
CS72045	pB7HFN-AT4G29420decoy
CS72046	pK7HFN-AT4G29420decoy
CS72047	pB7HFN-AT4G33210decoy
CS72048	pK7HFN-AT4G39550decoy
CS72049	pK7HFN-AT4G39560decoy
CS72050	pK7HFN-AT4G39570decoy
CS72051	pK7HFN-AT4G39580decoy
CS72052	pB7HFN-AT4G39600decoy
CS72053	pK7HFN-AT5G01720decoy
CS72054	pB7HFN-AT5G03020decoy
CS72055	pK7HFN-AT5G15440decoy
CS72056	pK7HFN-AT5G15710decoy
CS72057	pB7HFN-AT5G15710decoy
CS72058	pB7HFN-AT5G18680decoy
CS72059	pK7HFN-AT5G18780decoy
CS72060	pB7HFN-AT5G18780decoy
CS72061	pB7HFN-AT5G21040decoy
CS72062	pK7HFN-AT5G22700decoy
CS72063	pK7HFN-AT5G22730decoy
CS72064	pB7HFN-AT5G25350decoy
CS72065	pK7HFN-AT5G27750decoy
CS72066	pB7HFN-AT5G27750decoy
CS72067	pK7HFN-AT5G35995decoy
CS72068	pB7HFN-AT5G42350decoy
CS72069	pK7HFN-AT5G43190decoy
CS72070	pB7HFN-AT5G44980decoy
CS72071	pK7HFN-AT5G45360decoy
CS72072	pB7HFN-AT5G45360decoy
CS72073	pK7HFN-AT5G48170decoy
CS72074	pB7HFN-AT5G48980decoy
CS72075	pK7HFN-AT5G48990decoy
CS72076	pB7HFN-AT5G48990decoy
CS72077	pB7HFN-AT5G49980decoy
CS72078	pK7HFN-AT5G50450decoy
CS72079	pB7HFN-AT5G51380decoy
CS72080	pB7HFN-AT5G52120decoy
CS72081	pB7HFN-AT5G52880decoy
CS72082	pK7HFN-AT5G56180decoy
CS72083	pB7HFN-AT5G56180decoy
CS72084	pK7HFN-AT5G56370decoy
CS72085	pB7HFN-AT5G56420decoy
CS72086	pK7HFN-AT5G56420decoy
CS72087	pB7HFN-AT5G56700decoy
CS72088	pK7HFN-AT5G56810decoy
CS72089	pK7HFN-AT5G57900decoy
CS72090	pK7HFN-AT5G60570decoy
CS72091	pB7HFN-AT5G60610decoy
CS72092	pK7HFN-AT5G62970decoy
CS72093	pB7HFN-AT5G65850decoy
CS72094	pB7HFN-AT5G67250decoy
CS72095	pK7HFN-AT5G67250decoy
CS72096	pB7HFC-AT3G07370decoy
CS72097	pB7HFN-AT2G33340decoy
CS72098	pK7HFN-AT2G33340decoy
CS72099	pB7HFN-AT1G04510decoy
CS72100	pK7HFN-AT1G04510decoy
CS72101	pB7HFC-AT1G01670decoy
CS72102	pB7HFC-AT1G01680decoy
CS72103	pB7HFC-AT5G61560decoy
CS72104	pB7HFC-AT5G65500decoy
CS72105	pB7HFN-AT5G67530decoy
CS72106	pK7HFN-AT5G67530decoy
CS72107	pB7HFN-AT5G18340decoy
CS72108	pK7HFN-AT5G18340decoy
CS72109	pB7HFN-AT5G18330decoy
CS72110	pK7HFN-AT5G18330decoy
CS72111	pB7HFN-AT5G18320decoy
CS72112	pK7HFN-AT5G18320decoy
CS72113	pB7HFN-AT1G27910decoy
CS72114	pK7HFN-AT1G27910decoy
CS72115	pK7HFN-AT1G20780decoy
CS72116	pB7HFN-AT5G62560decoy
CS72117	pB7HFN-AT5G40140decoy
CS72118	pK7HFN-AT5G40140decoy
CS72119	pB7HFN-AT3G47820decoy
CS72120	pK7HFN-AT3G47820decoy
CS72121	pB7HFN-AT5G65200decoy
CS72122	pB7HFC-AT2G45920decoy
CS72123	pB7HFC-AT3G61390decoy
CS72124	pB7HFC-AT2G45910decoy
CS72125	pB7HFC-AT3G49060decoy
CS72126	pB7HFN-AT5G65920decoy
CS72127	pK7HFN-AT5G65920decoy
CS72128	pB7HFN-AT3G49810decoy
CS72129	pK7HFN-AT3G49810decoy
CS72130	pB7HFN-AT3G18710decoy
CS72131	pB7HFN-AT5G09800decoy
CS72132	pB7HFN-AT5G64660decoy
CS72133	pK7HFN-AT5G64660decoy
CS72134	pB7HFN-AT1G49780decoy
CS72135	pK7HFN-AT1G49780decoy
CS72136	pB7HFN-AT3G19380decoy
CS72137	pK7HFN-AT3G19380decoy
CS72138	pB7HFN-AT3G11840decoy
CS72139	pK7HFN-AT3G11840decoy
CS72140	pK7HFN-AT2G35930decoy
CS72141	pB7HFN-AT3G52450decoy
CS72142	pK7HFN-AT3G52450decoy
CS72143	pB7HFN-AT5G37490decoy
CS72144	pK7HFN-AT5G37490decoy
CS72145	pB7HFN-AT1G66160decoy
CS72146	pK7HFN-AT1G66160decoy
CS72147	pB7HFC-AT1G10560decoy
CS72148	pB7HFN-AT1G10560decoy
CS72149	pK7HFN-AT1G10560decoy
CS72150	pB7HFC-AT1G29340decoy
CS72151	pK7HFN-AT1G29340decoy
CS72152	pB7HFC-AT3G54850decoy
CS72153	pB7HFN-AT3G54850decoy
CS72154	pK7HFN-AT3G54850decoy
CS72155	pB7HFC-AT3G46510decoy
CS72156	pK7HFN-AT3G46510decoy
CS72157	pB7HFN-AT1G23030decoy
CS72158	pK7HFN-AT1G23030decoy
CS72159	pB7HFC-AT1G67530decoy
CS72160	pB7HFN-AT1G67530decoy
CS72161	pK7HFN-AT1G67530decoy
CS72162	pB7HFC-AT5G67340decoy
CS72163	pB7HFN-AT5G67340decoy
CS72164	pK7HFN-AT5G67340decoy

## Sheet: 35S His-FLAG Vector
ABRC Stock Number
pB7HFN-AT1G09650decoy
pK7HFN-AT1G09650decoy
pB7HFN-AT1G10780decoy
pK7HFN-AT1G10780decoy
pB7HFN-AT1G11620decoy
pK7HFN-AT1G12710decoy
pB7HFN-AT1G12710decoy
pK7HFN-AT1G12820decoy
pB7HFN-AT1G13570decoy
pK7HFN-AT1G13570decoy
pB7HFN-AT1G14330decoy
pB7HFN-AT1G15670decoy
pK7HFN-AT1G15670decoy
pB7HFN-AT1G15680decoy
pK7HFN-AT1G15680decoy
pB7HFN-AT1G16250decoy
pK7HFN-AT1G19070decoy
pB7HFN-AT1G19070decoy
pK7HFN-AT1G19160decoy
pB7HFN-AT1G19160decoy
pB7HFN-AT1G19460decoy
pK7HFN-AT1G19460decoy
pB7HFN-AT1G20800decoy
pB7HFN-AT1G20940decoy
pK7HFN-AT1G21410decoy
pK7HFN-AT1G21760decoy
pB7HFN-AT1G21760decoy
pK7HFN-AT1G22040decoy
pB7HFN-AT1G22040decoy
pK7HFN-AT1G22220decoy
pB7HFN-AT1G22220decoy
pB7HFN-AT1G23780decoy
pB7HFN-AT1G26930decoy
pK7HFN-AT1G27340decoy
pB7HFN-AT1G27340decoy
pK7HFN-AT1G27420decoy
pB7HFN-AT1G27420decoy
pB7HFN-AT1G30090decoy
pK7HFN-AT1G30200decoy
pB7HFN-AT1G30200decoy
pK7HFN-AT1G30950decoy
pB7HFN-AT1G31000decoy
pK7HFN-AT1G31080decoy
pB7HFN-AT1G31080decoy
pK7HFN-AT1G31350decoy
pB7HFN-AT1G31350decoy
pB7HFN-AT1G32020decoy
pK7HFN-AT1G32375decoy
pB7HFN-AT1G32375decoy
pK7HFN-AT1G32430decoy
pB7HFN-AT1G47056decoy
pK7HFN-AT1G47056decoy
pB7HFN-AT1G47270decoy
pK7HFN-AT1G47270decoy
pB7HFN-AT1G47730decoy
pK7HFN-AT1G47790decoy
pB7HFN-AT1G47810decoy
pB7HFN-AT1G50870decoy
pK7HFN-AT1G50870decoy
pB7HFN-AT1G51320decoy
pK7HFN-AT1G51320decoy
pB7HFN-AT1G51370decoy
pK7HFN-AT1G51550decoy
pB7HFN-AT1G51550decoy
pK7HFN-AT1G53320decoy
pB7HFN-AT1G53320decoy
pK7HFN-AT1G53790decoy
pB7HFN-AT1G54550decoy
pK7HFN-AT1G55000decoy
pB7HFN-AT1G55000decoy
pB7HFN-AT1G55030decoy
pK7HFN-AT1G55270decoy
pB7HFN-AT1G55270decoy
pK7HFN-AT1G59680decoy
pB7HFN-AT1G60400decoy
pK7HFN-AT1G60570decoy
pB7HFN-AT1G60570decoy
pB7HFN-AT1G61330decoy
pK7HFN-AT1G61330decoy
pB7HFN-AT1G63090decoy
pK7HFN-AT1G63090decoy
pB7HFN-AT1G65740decoy
pK7HFN-AT1G67190decoy
pB7HFN-AT1G74510decoy
pK7HFN-AT1G76920decoy
pB7HFN-AT1G76920decoy
pK7HFN-AT1G77000decoy
pB7HFN-AT1G77000decoy
pB7HFN-AT1G78100decoy
pK7HFN-AT1G78280decoy
pK7HFN-AT1G78750decoy
pB7HFN-AT1G78760decoy
pK7HFN-AT1G78760decoy
pB7HFN-AT1G80110decoy
pK7HFN-AT1G80440decoy
pB7HFN-AT1G80440decoy
pK7HFN-AT1G80570decoy
pB7HFN-AT1G80570decoy
pK7HFN-AT1G80960decoy
pB7HFN-AT2G01620decoy
pK7HFN-AT2G02300decoy
pB7HFN-AT2G02300decoy
pB7HFN-AT2G02340decoy
pK7HFN-AT2G02350decoy
pB7HFN-AT2G02350decoy
pB7HFN-AT2G02360decoy
pK7HFN-AT2G02870decoy
pB7HFN-AT2G02870decoy
pK7HFN-AT2G17030decoy
pB7HFN-AT2G18280decoy
pK7HFN-AT2G18280decoy
pB7HFN-AT2G18780decoy
pK7HFN-AT2G21680decoy
pB7HFN-AT2G22030decoy
pK7HFN-AT2G22030decoy
pK7HFN-AT2G24540decoy
pB7HFN-AT2G24540decoy
pK7HFN-AT2G26030decoy
pB7HFN-AT2G26030decoy
pB7HFN-AT2G29770decoy
pK7HFN-AT2G29770decoy
pB7HFN-AT2G29910decoy
pK7HFN-AT2G29910decoy
pB7HFN-AT2G32560decoy
pK7HFN-AT2G32560decoy
pB7HFN-AT2G36090decoy
pK7HFN-AT2G36090decoy
pB7HFN-AT2G39490decoy
pB7HFN-AT2G40920decoy
pK7HFN-AT2G41170decoy
pB7HFN-AT2G41170decoy
pK7HFN-AT2G44030decoy
pB7HFN-AT2G44030decoy
pK7HFN-AT2G44130decoy
pB7HFN-AT2G44130decoy
pK7HFN-AT2G44630decoy
pB7HFN-AT2G44630decoy
pB7HFN-AT2G44700decoy
pK7HFN-AT3G03030decoy
pB7HFN-AT3G03360decoy
pK7HFN-AT3G03360decoy
pK7HFN-AT3G06380decoy
pK7HFN-AT3G06570decoy
pB7HFN-AT3G06570decoy
pK7HFN-AT3G07550decoy
pB7HFN-AT3G07550decoy
pB7HFN-AT3G07870decoy
pK7HFN-AT3G08750decoy
pB7HFN-AT3G12350decoy
pK7HFN-AT3G12350decoy
pB7HFN-AT3G16740decoy
pK7HFN-AT3G16740decoy
pB7HFN-AT3G17710decoy
pK7HFN-AT3G18910decoy
pB7HFN-AT3G18910decoy
pK7HFN-AT3G18980decoy
pB7HFN-AT3G18980decoy
pK7HFN-AT3G21410decoy
pB7HFN-AT3G22350decoy
pB7HFN-AT3G23880decoy
pK7HFN-AT3G24760decoy
pB7HFN-AT3G24760decoy
pK7HFN-AT3G26000decoy
pB7HFN-AT3G26000decoy
pK7HFN-AT3G26920decoy
pB7HFN-AT3G26920decoy
pB7HFN-AT3G27150decoy
pK7HFN-AT3G27150decoy
pK7HFN-AT3G49480decoy
pB7HFN-AT3G50080decoy
pK7HFN-AT3G50080decoy
pB7HFN-AT3G52680decoy
pK7HFN-AT3G53000decoy
pB7HFN-AT3G54480decoy
pB7HFN-AT3G54650decoy
pK7HFN-AT3G54650decoy
pB7HFN-AT3G58880decoy
pK7HFN-AT3G58900decoy
pB7HFN-AT3G58930decoy
pK7HFN-AT3G59000decoy
pB7HFN-AT3G59210decoy
pK7HFN-AT3G59210decoy
pK7HFN-AT3G59940decoy
pB7HFN-AT3G59940decoy
pK7HFN-AT3G61060decoy
pB7HFN-AT3G61060decoy
pK7HFN-AT3G61590decoy
pK7HFN-AT3G62980decoy
pB7HFN-AT3G63220decoy
pK7HFN-AT4G00755decoy
pB7HFN-AT4G00755decoy
pK7HFN-AT4G02440decoy
pB7HFN-AT4G02440decoy
pK7HFN-AT4G02740decoy
pB7HFN-AT4G03190decoy
pK7HFN-AT4G03190decoy
pK7HFN-AT4G05470decoy
pK7HFN-AT4G08980decoy
pB7HFN-AT4G08980decoy
pK7HFN-AT4G09920decoy
pB7HFN-AT4G09920decoy
pK7HFN-AT4G10400decoy
pB7HFN-AT4G14096decoy
pK7HFN-AT4G14096decoy
pB7HFN-AT4G14905decoy
pK7HFN-AT4G14905decoy
pK7HFN-AT4G15475decoy
pK7HFN-AT4G19870decoy
pB7HFN-AT4G19870decoy
pK7HFN-AT4G21240decoy
pB7HFN-AT4G21240decoy
pK7HFN-AT4G22390decoy
pB7HFN-AT4G29370decoy
pK7HFN-AT4G29370decoy
pB7HFN-AT4G29420decoy
pK7HFN-AT4G29420decoy
pB7HFN-AT4G33210decoy
pK7HFN-AT4G39550decoy
pK7HFN-AT4G39560decoy
pK7HFN-AT4G39570decoy
pK7HFN-AT4G39580decoy
pB7HFN-AT4G39600decoy
pK7HFN-AT5G01720decoy
pB7HFN-AT5G03020decoy
pK7HFN-AT5G15440decoy
pK7HFN-AT5G15710decoy
pB7HFN-AT5G15710decoy
pB7HFN-AT5G18680decoy
pK7HFN-AT5G18780decoy
pB7HFN-AT5G18780decoy
pB7HFN-AT5G21040decoy
pK7HFN-AT5G22700decoy
pK7HFN-AT5G22730decoy
pB7HFN-AT5G25350decoy
pK7HFN-AT5G27750decoy
pB7HFN-AT5G27750decoy
pK7HFN-AT5G35995decoy
pB7HFN-AT5G42350decoy
pK7HFN-AT5G43190decoy
pB7HFN-AT5G44980decoy
pK7HFN-AT5G45360decoy
pB7HFN-AT5G45360decoy
pK7HFN-AT5G48170decoy
pB7HFN-AT5G48980decoy
pK7HFN-AT5G48990decoy
pB7HFN-AT5G48990decoy
pB7HFN-AT5G49980decoy
pK7HFN-AT5G50450decoy
pB7HFN-AT5G51380decoy
pB7HFN-AT5G52120decoy
pB7HFN-AT5G52880decoy
pK7HFN-AT5G56180decoy
pB7HFN-AT5G56180decoy
pK7HFN-AT5G56370decoy
pB7HFN-AT5G56420decoy
pK7HFN-AT5G56420decoy
pB7HFN-AT5G56700decoy
pK7HFN-AT5G56810decoy
pK7HFN-AT5G57900decoy
pK7HFN-AT5G60570decoy
pB7HFN-AT5G60610decoy
pK7HFN-AT5G62970decoy
pB7HFN-AT5G65850decoy
pB7HFN-AT5G67250decoy
pK7HFN-AT5G67250decoy
pB7HFC-AT3G07370decoy
pB7HFN-AT2G33340decoy
pK7HFN-AT2G33340decoy
pB7HFN-AT1G04510decoy
pK7HFN-AT1G04510decoy
pB7HFC-AT1G01670decoy
pB7HFC-AT1G01680decoy
pB7HFC-AT5G61560decoy
pB7HFC-AT5G65500decoy
pB7HFN-AT5G67530decoy
pK7HFN-AT5G67530decoy
pB7HFN-AT5G18340decoy
pK7HFN-AT5G18340decoy
pB7HFN-AT5G18330decoy
pK7HFN-AT5G18330decoy
pB7HFN-AT5G18320decoy
pK7HFN-AT5G18320decoy
pB7HFN-AT1G27910decoy
pK7HFN-AT1G27910decoy
pK7HFN-AT1G20780decoy
pB7HFN-AT5G62560decoy
pB7HFN-AT5G40140decoy
pK7HFN-AT5G40140decoy
pB7HFN-AT3G47820decoy
pK7HFN-AT3G47820decoy
pB7HFN-AT5G65200decoy
pB7HFC-AT2G45920decoy
pB7HFC-AT3G61390decoy
pB7HFC-AT2G45910decoy
pB7HFC-AT3G49060decoy
pB7HFN-AT5G65920decoy
pK7HFN-AT5G65920decoy
pB7HFN-AT3G49810decoy
pK7HFN-AT3G49810decoy
pB7HFN-AT3G18710decoy
pB7HFN-AT5G09800decoy
pB7HFN-AT5G64660decoy
pK7HFN-AT5G64660decoy
pB7HFN-AT1G49780decoy
pK7HFN-AT1G49780decoy
pB7HFN-AT3G19380decoy
pK7HFN-AT3G19380decoy
pB7HFN-AT3G11840decoy
pK7HFN-AT3G11840decoy
pK7HFN-AT2G35930decoy
pB7HFN-AT3G52450decoy
pK7HFN-AT3G52450decoy
pB7HFN-AT5G37490decoy
pK7HFN-AT5G37490decoy
pB7HFN-AT1G66160decoy
pK7HFN-AT1G66160decoy
pB7HFC-AT1G10560decoy
pB7HFN-AT1G10560decoy
pK7HFN-AT1G10560decoy
pB7HFC-AT1G29340decoy
pK7HFN-AT1G29340decoy
pB7HFC-AT3G54850decoy
pB7HFN-AT3G54850decoy
pK7HFN-AT3G54850decoy
pB7HFC-AT3G46510decoy
pK7HFN-AT3G46510decoy
pB7HFN-AT1G23030decoy
pK7HFN-AT1G23030decoy
pB7HFC-AT1G67530decoy
pB7HFN-AT1G67530decoy
pK7HFN-AT1G67530decoy
pB7HFC-AT5G67340decoy
pB7HFN-AT5G67340decoy
pK7HFN-AT5G67340decoy

## Sheet: pENTR Vector
ABRC Stock Number
pENTR-AT1G27910decoy
pENTR-AT1G67530decoy
pENTR-AT5G67340decoy
pENTR-AT5G67530decoy
pENTR-AT5G62560decoy
pENTR-AT3G47820decoy
pENTR-AT5G65200decoy
pENTR-AT5G40140decoy
pENTR-AT1G29340decoy
pENTR-AT5G18330decoy
pENTR-AT5G18340decoy
pENTR-AT5G18320decoy
pENTR-AT3G54850decoy
pENTR-AT3G46510decoy
pENTR-AT1G23030decoy
pENTR-AT1G10560decoy
pENTR-AT1G20780decoy
pENTR-AT1G49780decoy
pENTR-AT3G19380decoy
pENTR-AT2G35930decoy
pENTR-AT3G52450decoy
pENTR-AT3G11840decoy
pENTR-AT5G37490decoy
pENTR-AT1G66160decoy
pENTR-AT2G33340decoy
pENTR-AT1G04510decoy
pENTR-AT2G45920decoy
pENTR-AT3G61390decoy
pENTR-AT5G65500decoy
pENTR-AT5G61560decoy
pENTR-AT2G45910decoy
pENTR-AT3G49060decoy
pENTR-AT1G01680decoy
pENTR-AT1G01670decoy
pENTR-AT3G07370decoy
pENTR-AT3G18710decoy
pENTR-AT5G64660decoy
pENTR-AT5G09800decoy
pENTR-AT5G65920decoy
pENTR-AT3G49810decoy
pENTR-AT1G10780decoy
pENTR-AT1G31080decoy
pENTR-AT1G31350decoy
pENTR-AT1G47270decoy
pENTR-AT1G12710decoy
pENTR-AT1G12820decoy
pENTR-AT1G21410decoy
pENTR-AT1G22040decoy
pENTR-AT1G26930decoy
pENTR-AT1G30090decoy
pENTR-AT1G30200decoy
pENTR-AT1G53320decoy
pENTR-AT1G80110decoy
pENTR-AT1G80440decoy
pENTR-AT1G55000decoy
pENTR-AT1G63090decoy
pENTR-AT1G77000decoy
pENTR-AT1G78100decoy
pENTR-AT1G78280decoy
pENTR-AT1G78750decoy
pENTR-AT2G44130decoy
pENTR-AT3G03360decoy
pENTR-AT3G06380decoy
pENTR-AT2G02340decoy
pENTR-AT2G02360decoy
pENTR-AT2G02870decoy
pENTR-AT2G18280decoy
pENTR-AT2G18780decoy
pENTR-AT2G24540decoy
pENTR-AT2G36090decoy
pENTR-AT3G54650decoy
pENTR-AT3G12350decoy
pENTR-AT3G07870decoy
pENTR-AT3G49480decoy
pENTR-AT3G59940decoy
pENTR-AT3G61060decoy
pENTR-AT3G08750decoy
pENTR-AT3G16740decoy
pENTR-AT3G18980decoy
pENTR-AT3G21410decoy
pENTR-AT3G22350decoy
pENTR-AT3G23880decoy
pENTR-AT3G24760decoy
pENTR-AT3G61590decoy
pENTR-AT5G15710decoy
pENTR-AT5G18680decoy
pENTR-AT5G27750decoy
pENTR-AT4G02440decoy
pENTR-AT4G05470decoy
pENTR-AT4G08980decoy
pENTR-AT4G21240decoy
pENTR-AT4G29370decoy
pENTR-AT4G39570decoy
pENTR-AT5G15440decoy
pENTR-AT5G43190decoy
pENTR-AT1G09650decoy
pENTR-AT5G49980decoy
pENTR-AT5G50450decoy
pENTR-AT5G52880decoy
pENTR-AT5G56180decoy
pENTR-AT5G60570decoy
pENTR-AT5G65850decoy
pENTR-AT1G11620decoy
pENTR-AT1G15680decoy
pENTR-AT1G16250decoy
pENTR-AT1G13570decoy
pENTR-AT1G15670decoy
pENTR-AT1G22220decoy
pENTR-AT1G19070decoy
pENTR-AT1G19160decoy
pENTR-AT1G19460decoy
pENTR-AT1G20800decoy
pENTR-AT1G20940decoy
pENTR-AT1G21760decoy
pENTR-AT1G47730decoy
pENTR-AT1G51550decoy
pENTR-AT1G60400decoy
pENTR-AT5G25350decoy
pENTR-AT2G02300decoy
pENTR-AT1G76920decoy
pENTR-AT3G59000decoy
pENTR-AT1G30950decoy
pENTR-AT2G32560decoy
pENTR-AT1G53790decoy
pENTR-AT1G60570decoy
pENTR-AT2G02350decoy
pENTR-AT3G06570decoy
pENTR-AT2G01620decoy
pENTR-AT5G45360decoy
pENTR-AT1G31000decoy
pENTR-AT1G80570decoy
pENTR-AT1G47790decoy
pENTR-AT1G54550decoy
pENTR-AT3G07550decoy
pENTR-AT1G23780decoy
pENTR-AT5G01720decoy
pENTR-AT1G32020decoy
pENTR-AT1G47810decoy
pENTR-AT1G55030decoy
pENTR-AT1G61330decoy
pENTR-AT2G17030decoy
pENTR-AT1G55270decoy
pENTR-AT3G17710decoy
pENTR-AT4G03190decoy
pENTR-AT1G27340decoy
pENTR-AT1G32430decoy
pENTR-AT3G18910decoy
pENTR-AT1G50870decoy
pENTR-AT1G65740decoy
pENTR-AT3G63220decoy
pENTR-AT5G18780decoy
pENTR-AT5G22730decoy
pENTR-AT1G51320decoy
pENTR-AT1G59680decoy
pENTR-AT1G74510decoy
pENTR-AT3G54480decoy
pENTR-AT5G22700decoy
pENTR-AT1G27420decoy
pENTR-AT2G44630decoy
pENTR-AT2G44700decoy
pENTR-AT3G03030decoy
pENTR-AT1G80960decoy
pENTR-AT2G26030decoy
pENTR-AT2G39490decoy
pENTR-AT2G40920decoy
pENTR-AT2G41170decoy
pENTR-AT3G26000decoy
pENTR-AT4G02740decoy
pENTR-AT4G10400 decoy
pENTR-AT3G27150decoy
pENTR-AT3G50080decoy
pENTR-AT3G59210decoy
pENTR-AT4G00755decoy
pENTR-AT4G14905decoy
pENTR-AT4G39600decoy
pENTR-AT5G03020decoy
pENTR-AT5G21040decoy
pENTR-AT4G19870decoy
pENTR-AT4G22390decoy
pENTR-AT4G29420decoy
pENTR-AT4G39550decoy
pENTR-AT4G39560decoy
pENTR-AT4G39580decoy
pENTR-AT5G56420decoy
pENTR-AT5G57900decoy
pENTR-AT5G42350decoy
pENTR-AT5G48170decoy
pENTR-AT5G48980decoy
pENTR-AT1G14330decoy
pENTR-AT5G48990decoy
pENTR-AT5G60610decoy
pENTR-AT1G78760decoy
pENTR-AT5G67250decoy
pENTR-AT1G32375decoy
pENTR-AT1G47056decoy
pENTR-AT1G51370decoy
pENTR-AT1G67190 decoy
pENTR-AT2G29910decoy
pENTR-AT3G58900decoy
pENTR-AT3G58930decoy
pENTR-AT3G26920decoy
pENTR-AT3G52680decoy
pENTR-AT4G33210decoy
pENTR-AT3G62980decoy
pENTR-AT4G09920decoy
pENTR-AT4G14096decoy
pENTR-AT4G15475decoy
pENTR-AT5G56700decoy
pENTR-AT5G56810decoy
pENTR-AT5G62970decoy
pENTR-AT5G35995decoy
pENTR-AT5G44980decoy
pENTR-AT5G51380decoy
pENTR-AT5G56370decoy
pENTR-AT2G21680decoy
pENTR-AT2G22030decoy
pENTR-AT2G29770decoy
pENTR-AT2G44030decoy
pENTR-AT3G58880decoy
pENTR-AT5G52120decoy
pENTR-AT3G53000decoy
